# Supplementary material
Source: MDPI journal article supplement (https://www.mdpi.com/1424-8247/14/12/1291)

# Supplementary material 2

for

## Heterocyclic cathinones as inhibitors of kynurenine aminotransferase II – design, synthesis, and evaluation

Michal Maryška <sup>1,2</sup>, Lucie Svobodová <sup>1</sup>, Wim Dehaen <sup>3</sup>, Martina Hrabínová <sup>4,5</sup>, Michaela Rumlová <sup>6</sup>, Ondřej Soukup <sup>4,5</sup> and Martin Kuchař <sup>1,2\*</sup>

<sup>1</sup> Forensic Laboratory of Biologically Active Substances, Department of Chemistry of Natural Compounds, Faculty of Food and Biochemical Technology, UCT Prague, Technická 5, 16628 Prague, Czech Republic; maryskam@vscht.cz

<sup>2</sup> National Institute of Mental Health, Topolová 748, 250 67 Klecany, Czech Republic

<sup>3</sup> CZ-OPENSREEN: National Infrastructure for Chemical Biology, Department of Informatics and Chemistry, Faculty of Chemical Technology, UCT Prague, Technická 5, 16628 Prague, Czech Republic

<sup>4</sup> Biomedical Research Centre, University Hospital Hradec Králové, Sokolská 581, 50005 Hradec Králové, Czech Republic

<sup>5</sup> Department of Toxicology and Military Pharmacy, University of Defence, Třebešská 1575, 50005 Hradec Králové, Czech Republic

<sup>6</sup> Department of Biotechnology, Faculty of Food and Biochemical Technology, UCT Prague, Technická 5, 16628 Prague, Czech Republic

\* Correspondence: martin.kuchar@vscht.cz; Tel.: +420 220 444 431

### Table of contents:

|                                       |   |
|---------------------------------------|---|
| 1. NMR spectra of new compounds ..... | 2 |
|---------------------------------------|---|

## 1. NMR spectra of new compounds

Compound **18c** ( $^1\text{H}$  NMR, 400 MHz):

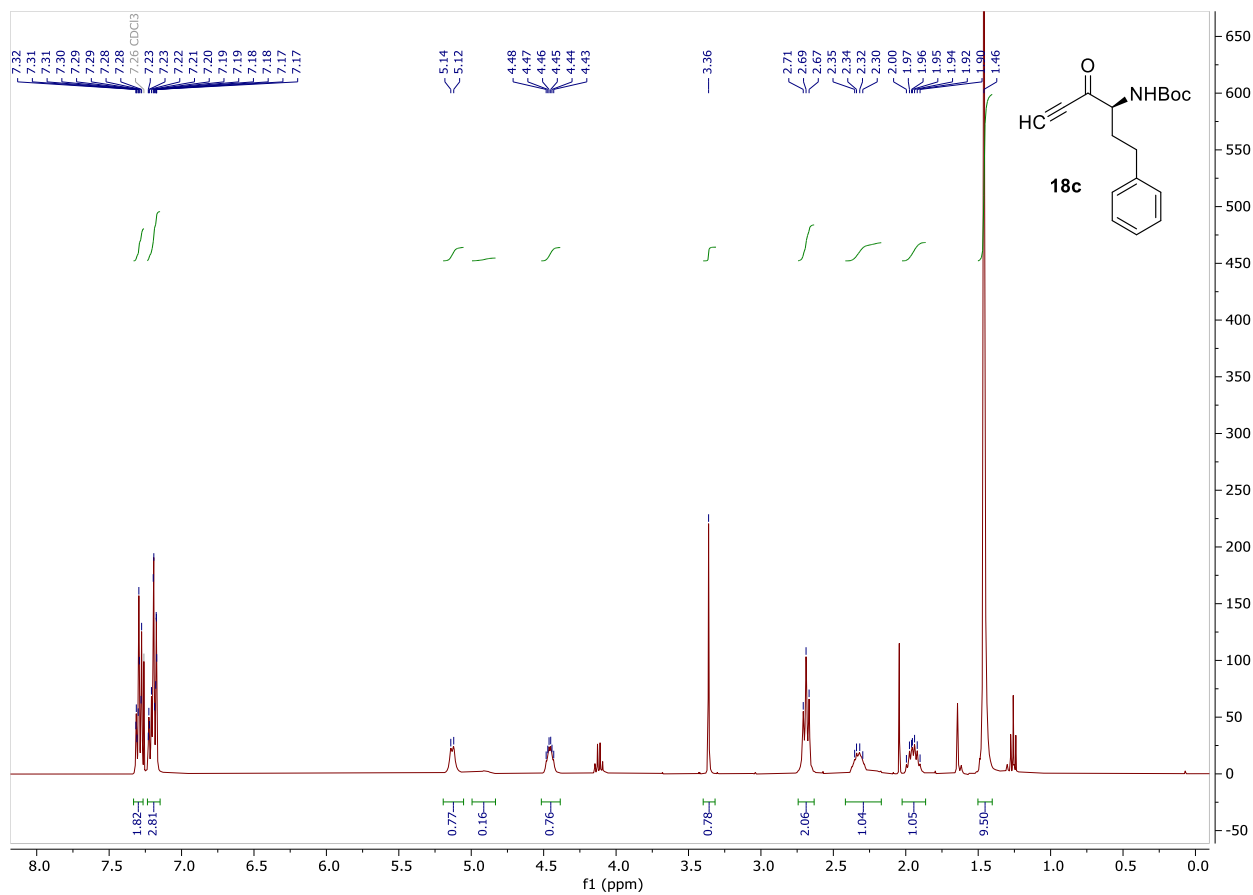

Compound **18c** ( $^{13}\text{C}$  NMR, 101 MHz):

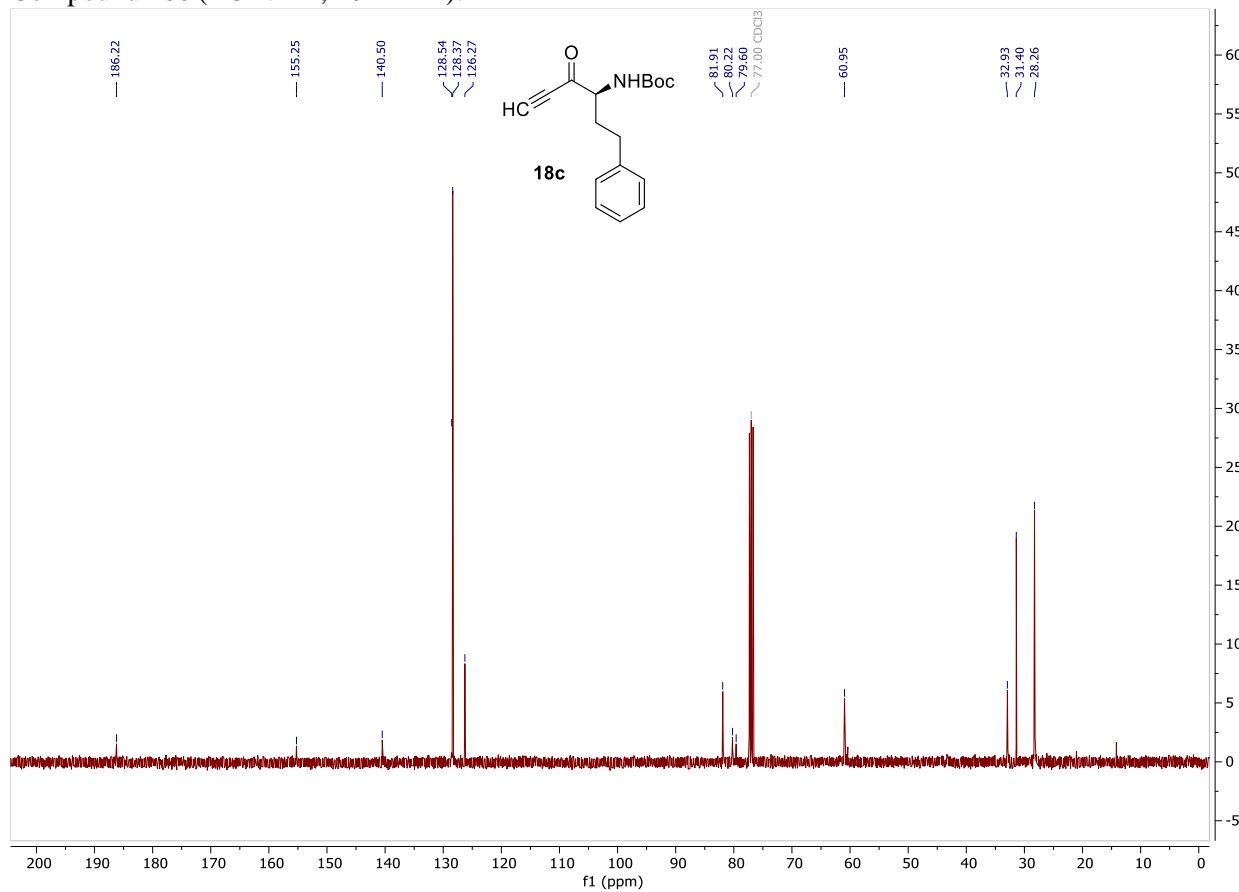

Compound **18d** ( $^1\text{H}$  NMR, 400 MHz):

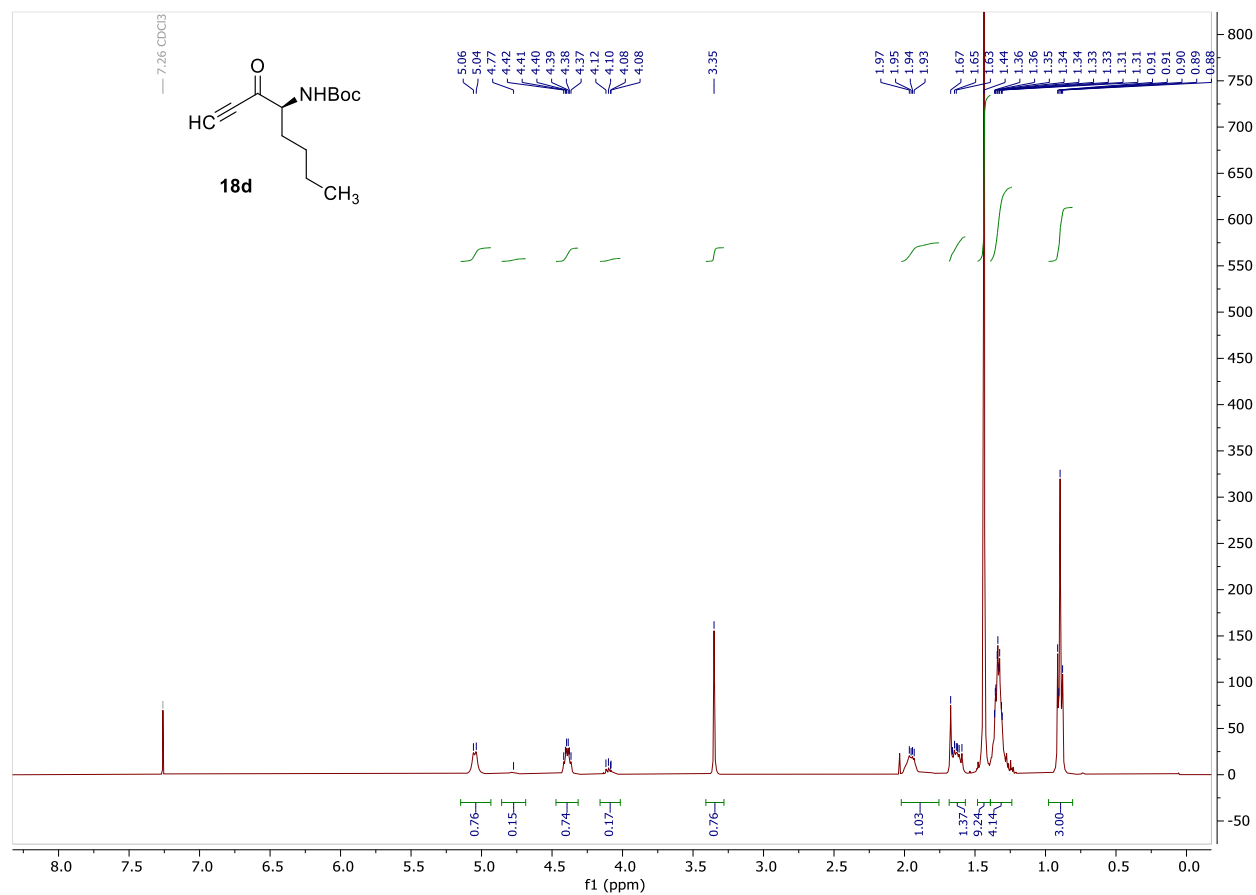

Compound **18d** ( $^{13}\text{C}$  NMR, 101 MHz):

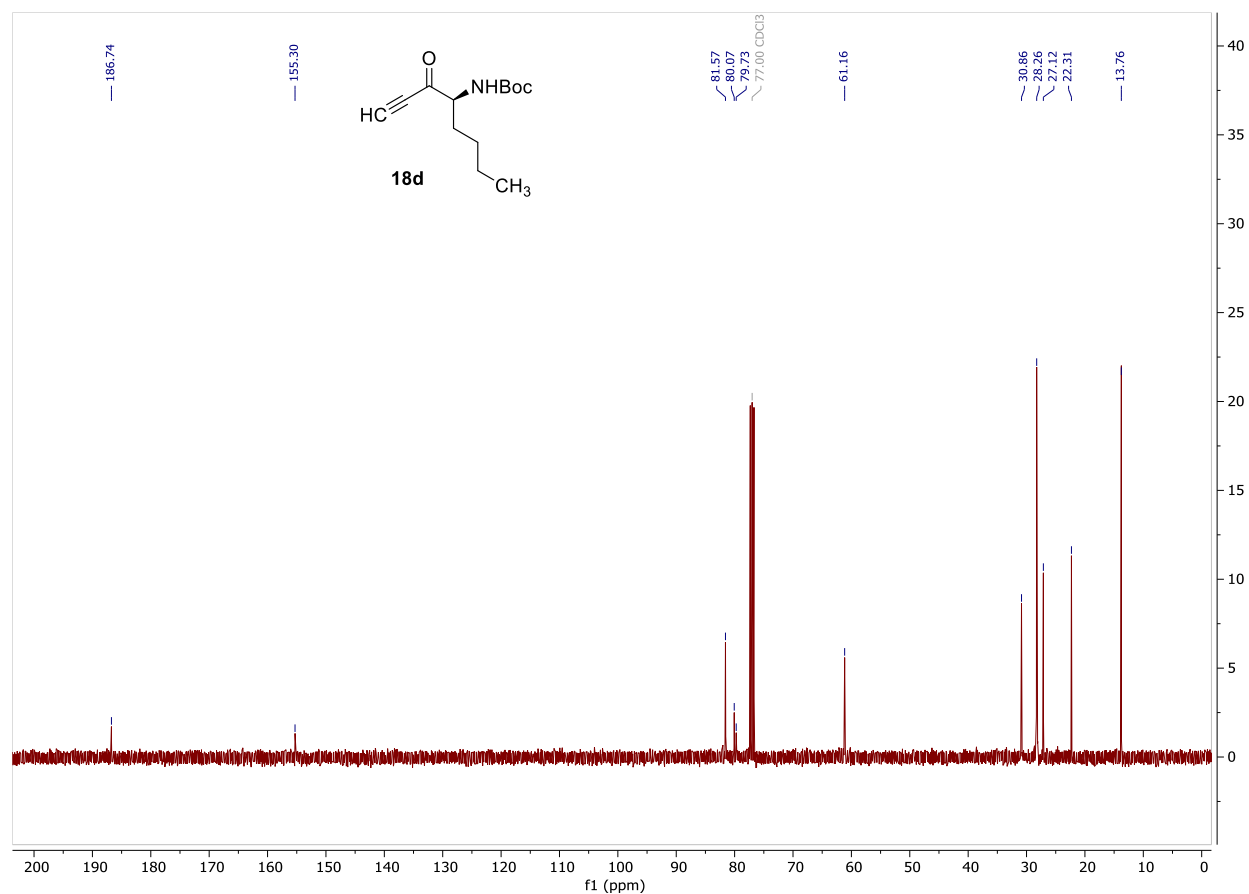

Compound **18e** ( $^1\text{H}$  NMR, 400 MHz):

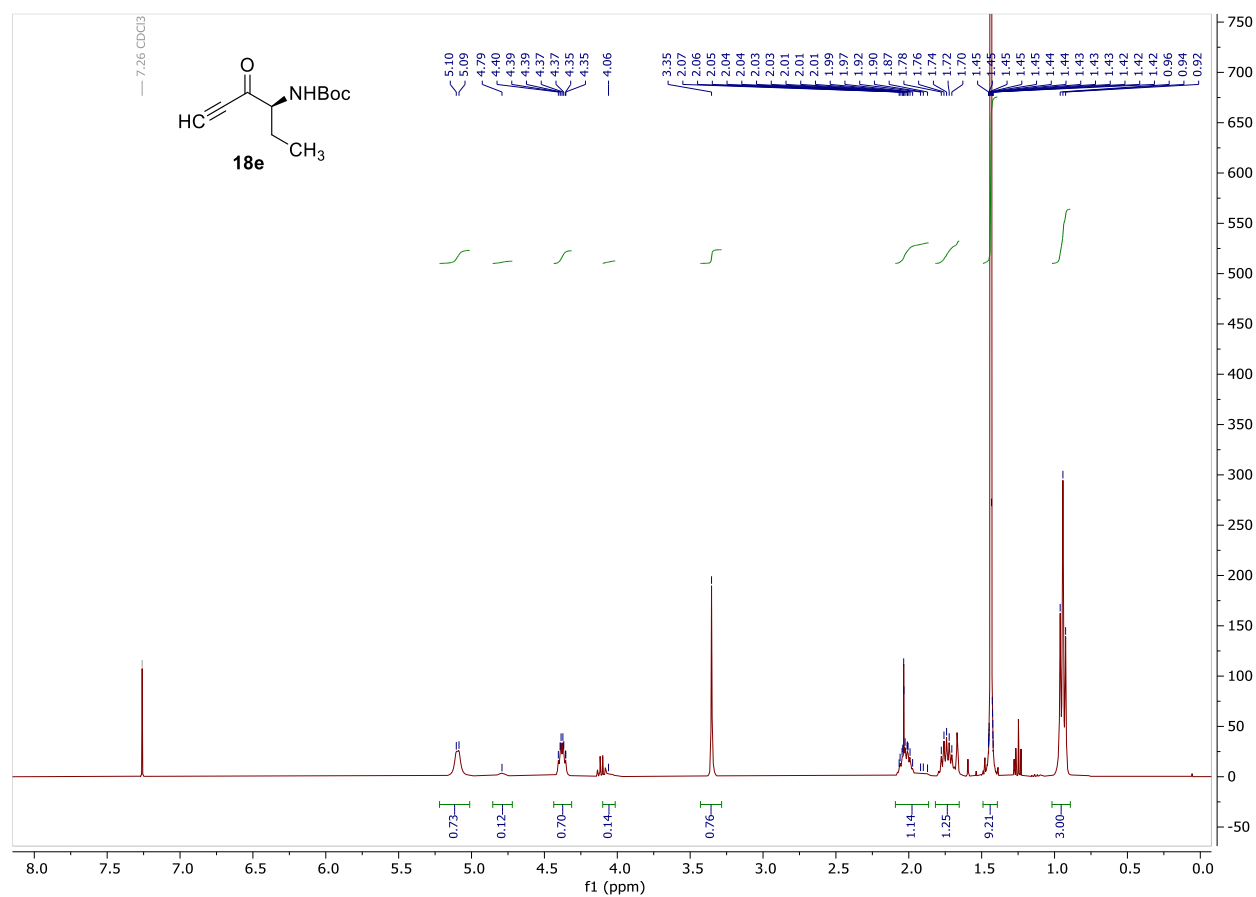

Compound **18e** ( $^{13}\text{C}$  NMR, 101 MHz):

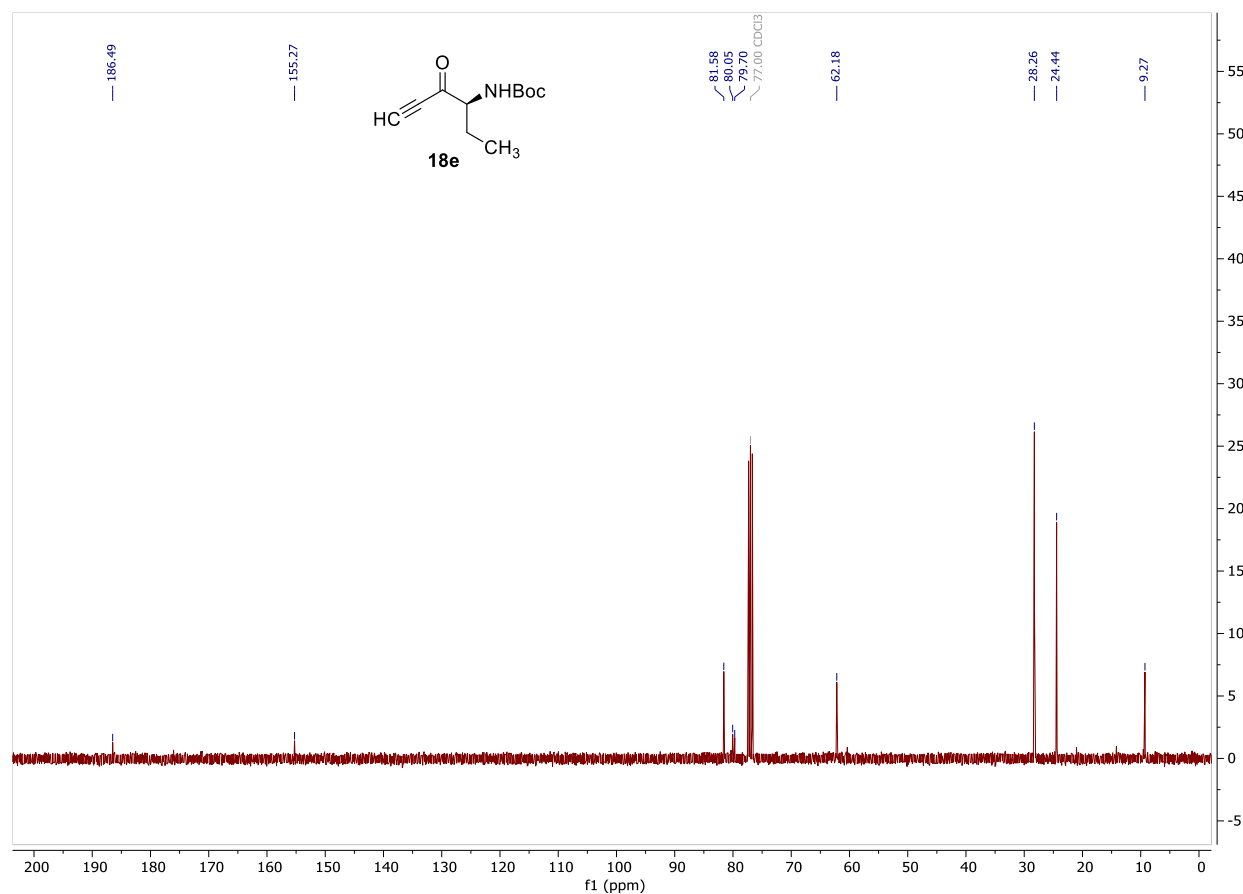



Compound **18f** ( $^1\text{H}$  NMR, 400 MHz):

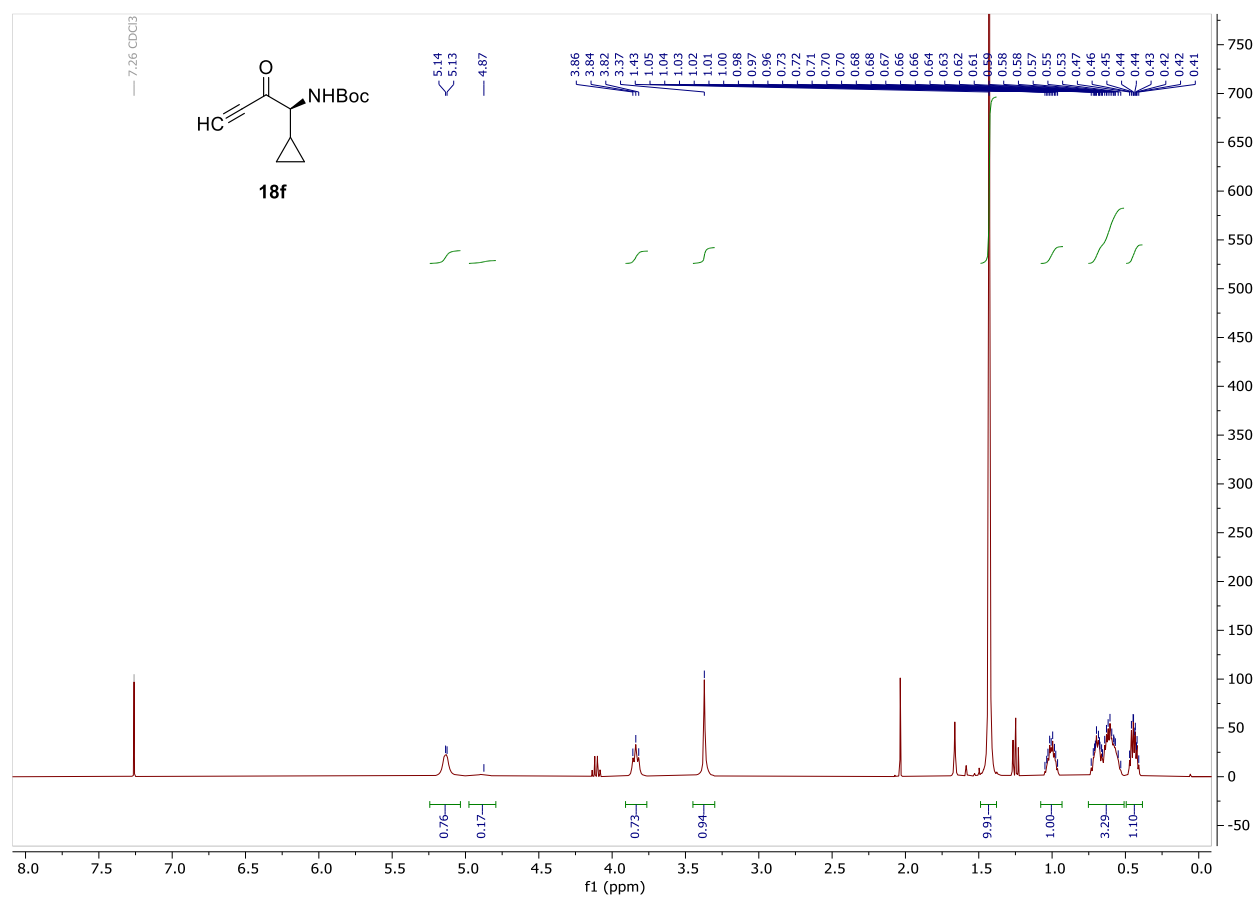

Compound **18f** ( $^{13}\text{C}$  NMR, 101 MHz):

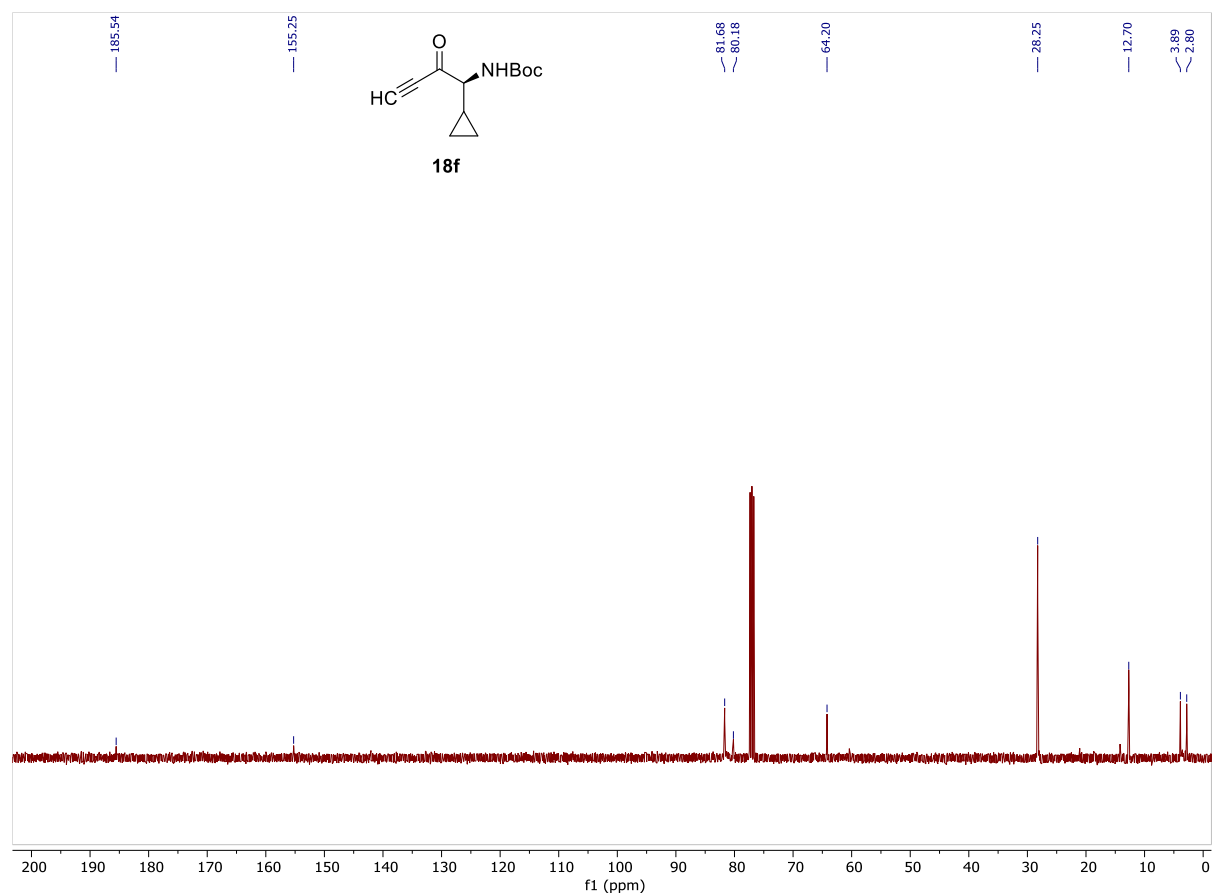

Compound **16** (<sup>1</sup>H NMR, 400 MHz):

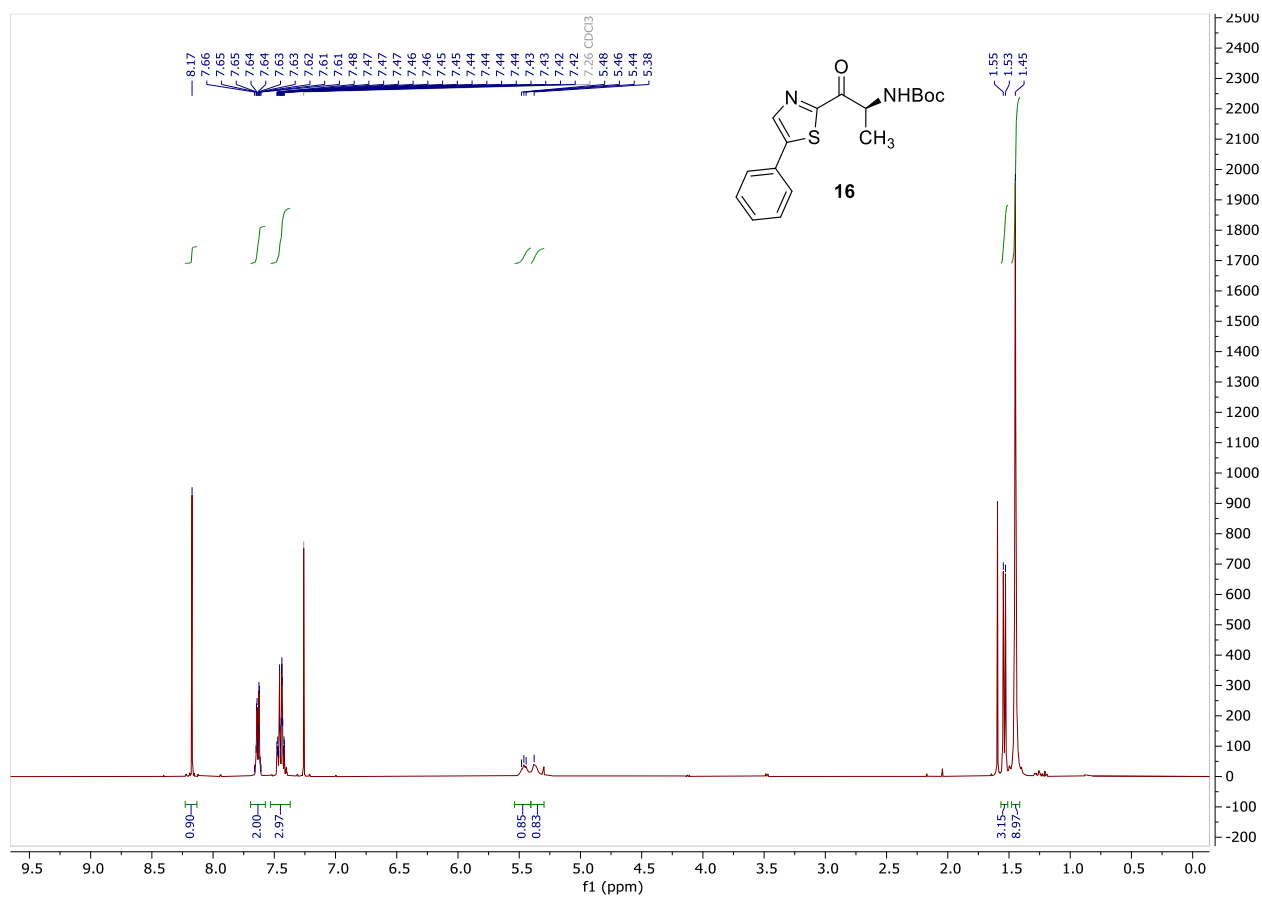

Compound **16** (<sup>13</sup>C NMR, 101 MHz):

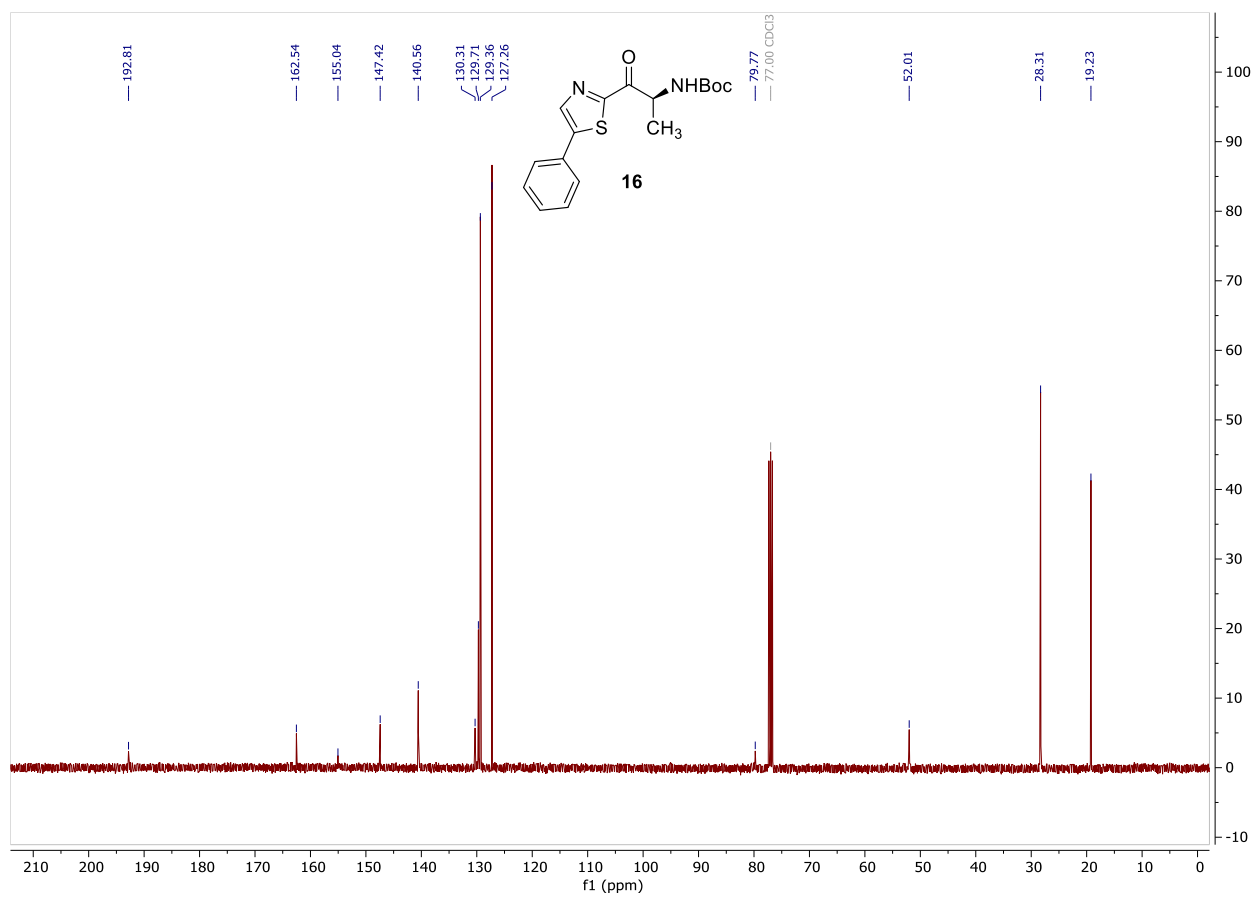

Compound **24a** ( $^1\text{H}$  NMR, 400 MHz):

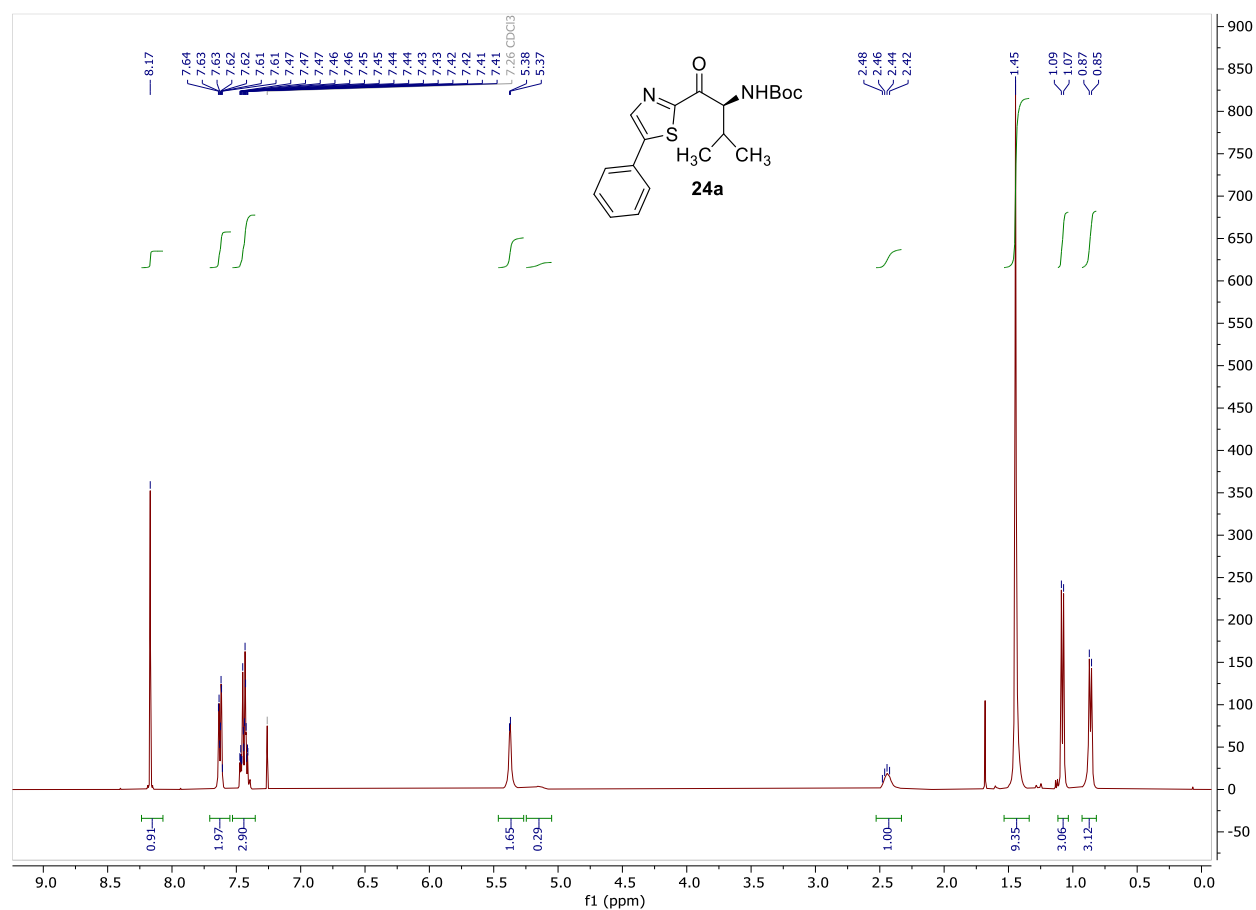

Compound **24a** ( $^{13}\text{C}$  NMR, 101 MHz):

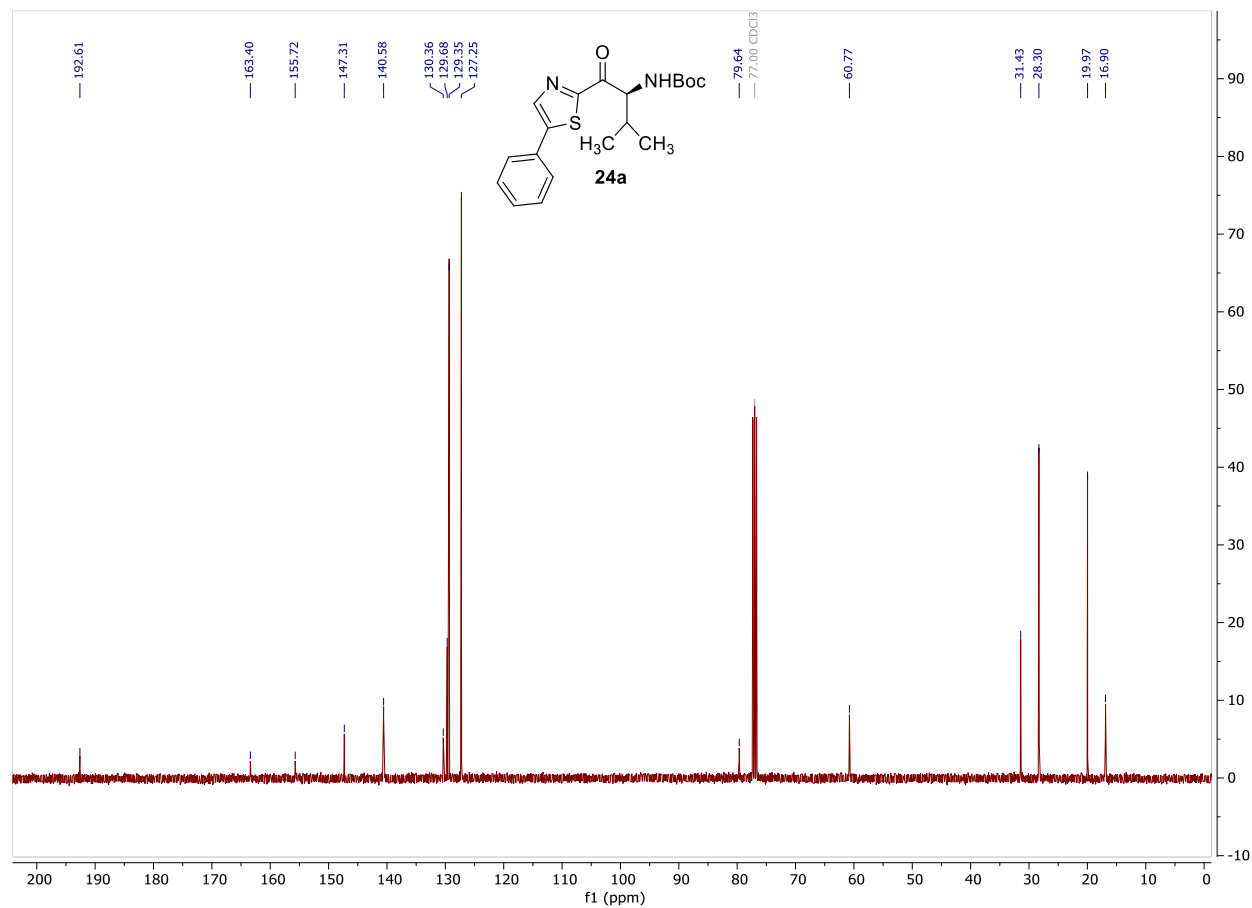

Compound **24b** ( $^1\text{H}$  NMR, 400 MHz):

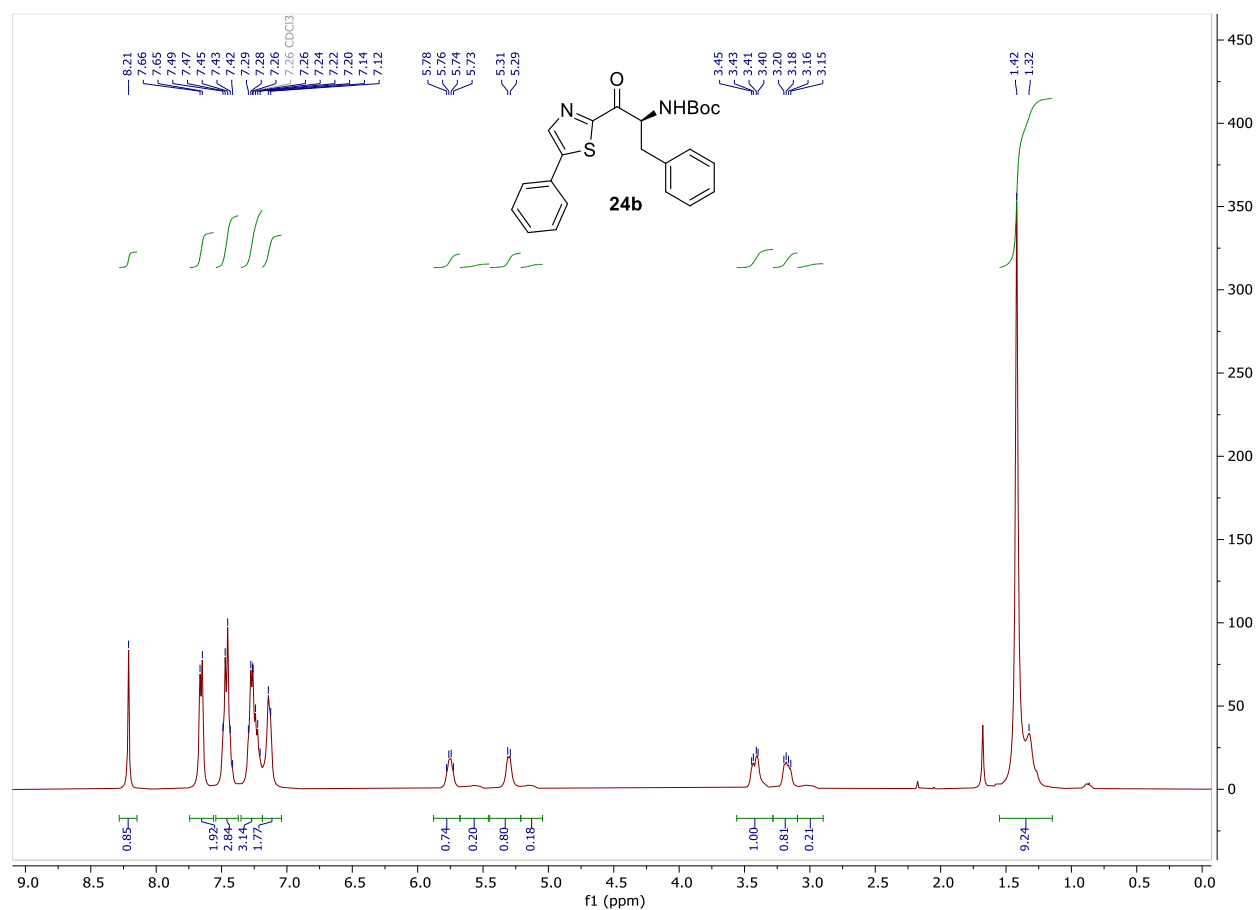

Compound **24b** ( $^{13}\text{C}$  NMR, 101 MHz):

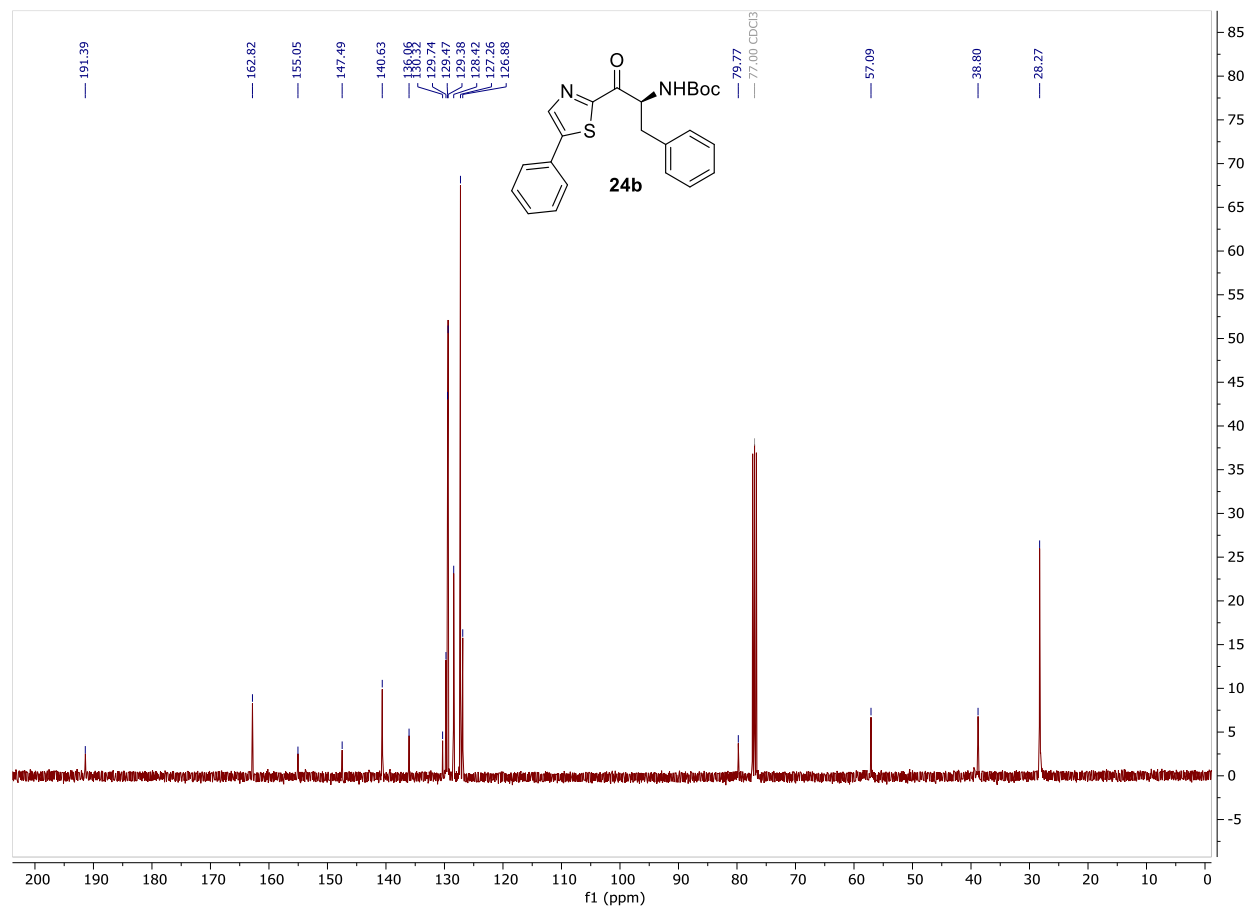

Compound **24c** ( $^1\text{H}$  NMR, 400 MHz):

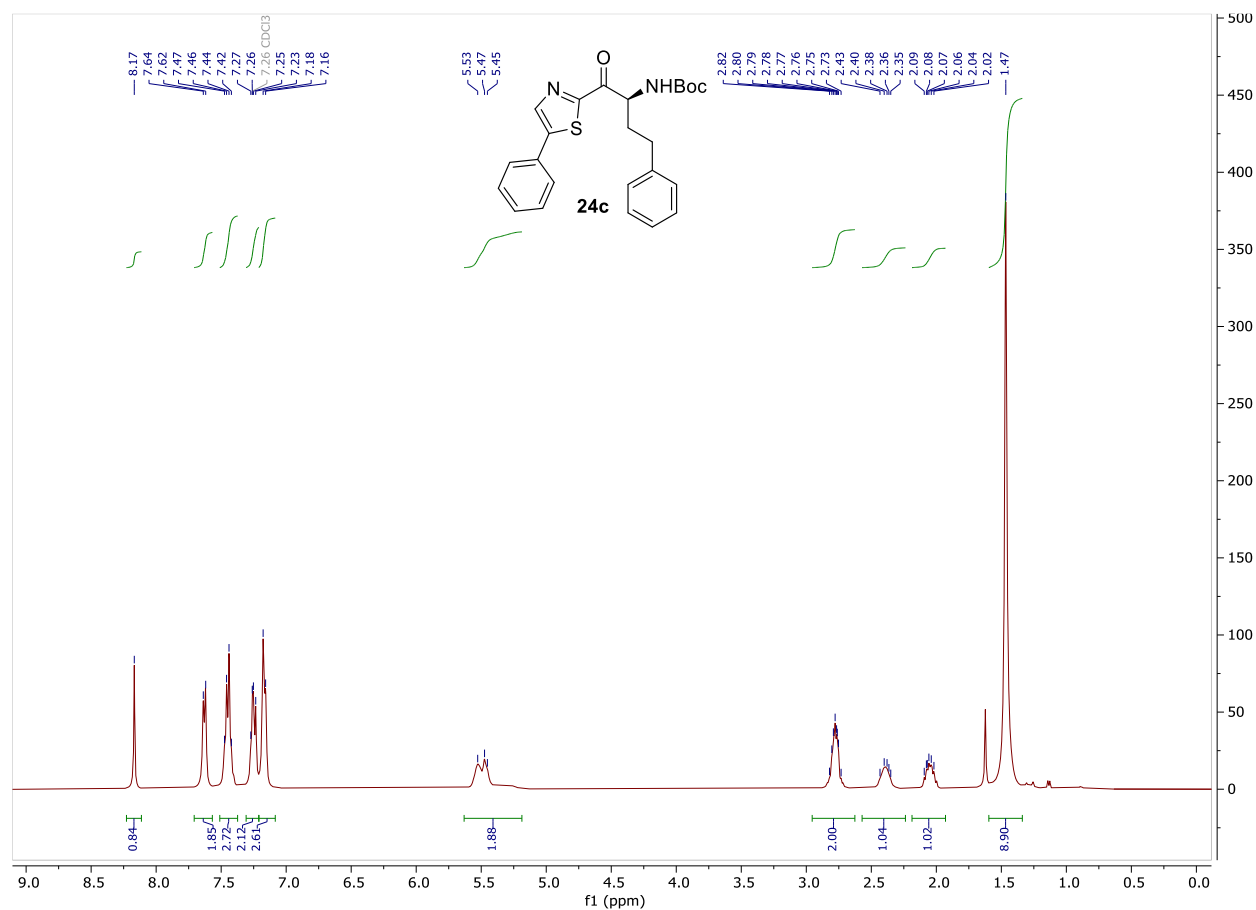

Compound **24c** ( $^{13}\text{C}$  NMR, 101 MHz):

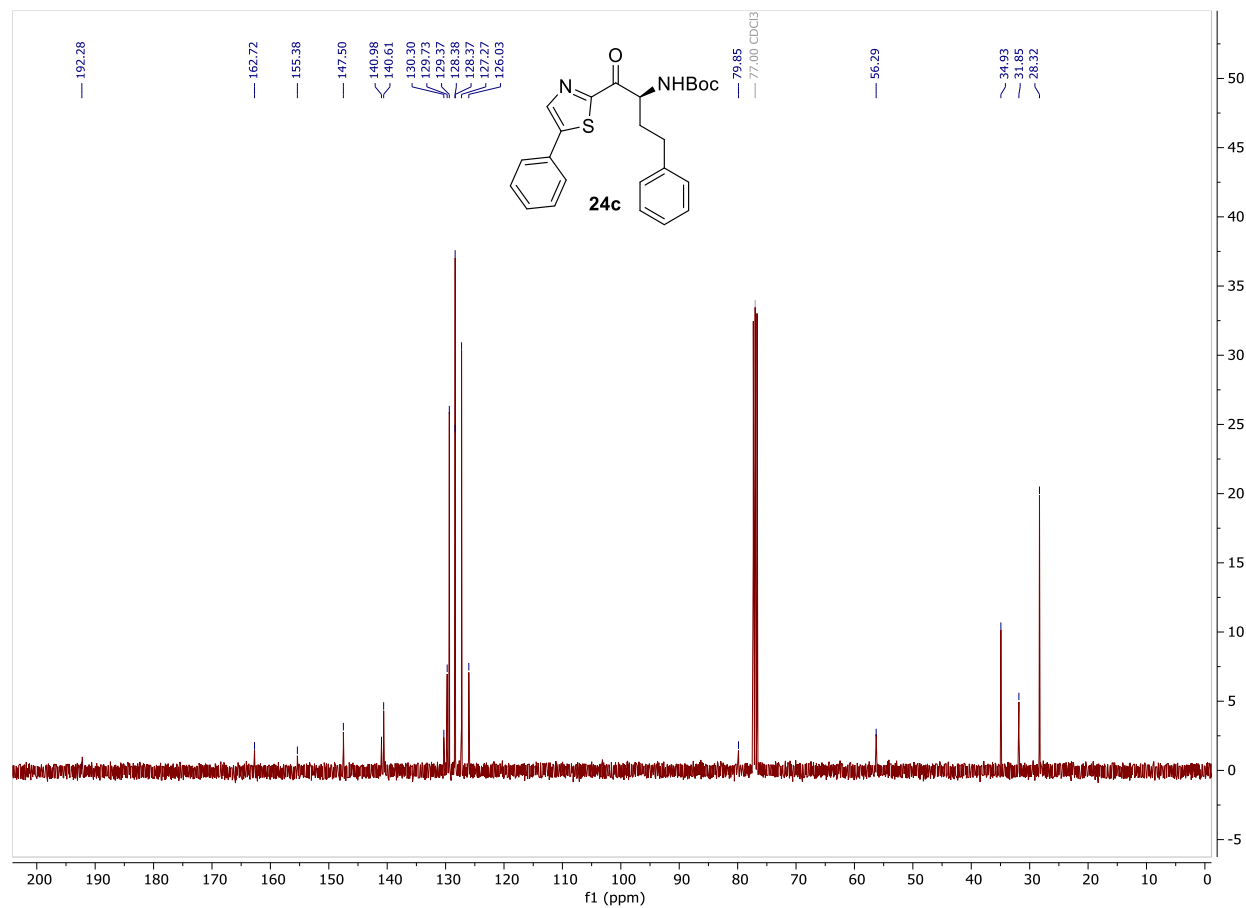

Compound **24d** ( $^1\text{H}$  NMR, 400 MHz):

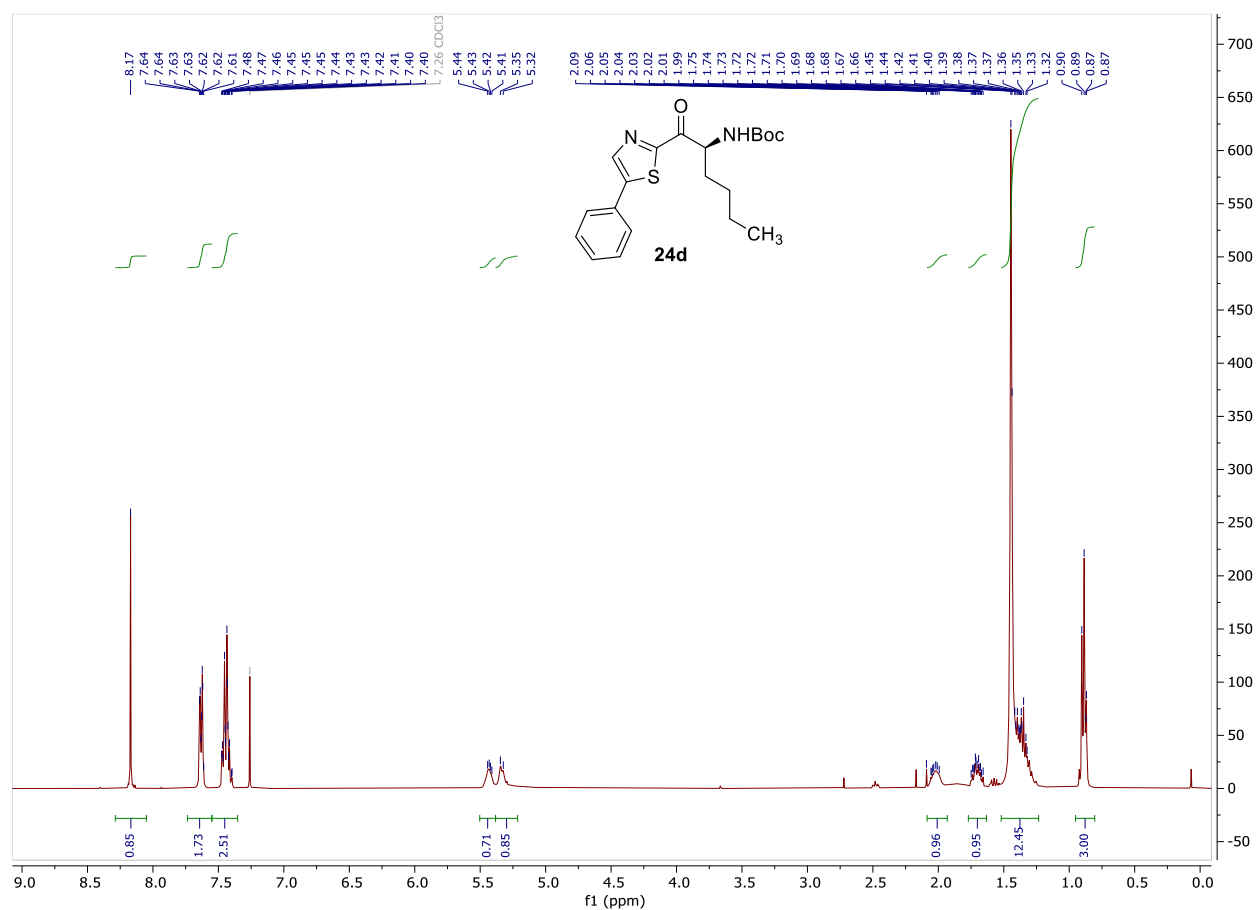

Compound **24d** ( $^{13}\text{C}$  NMR, 101 MHz):

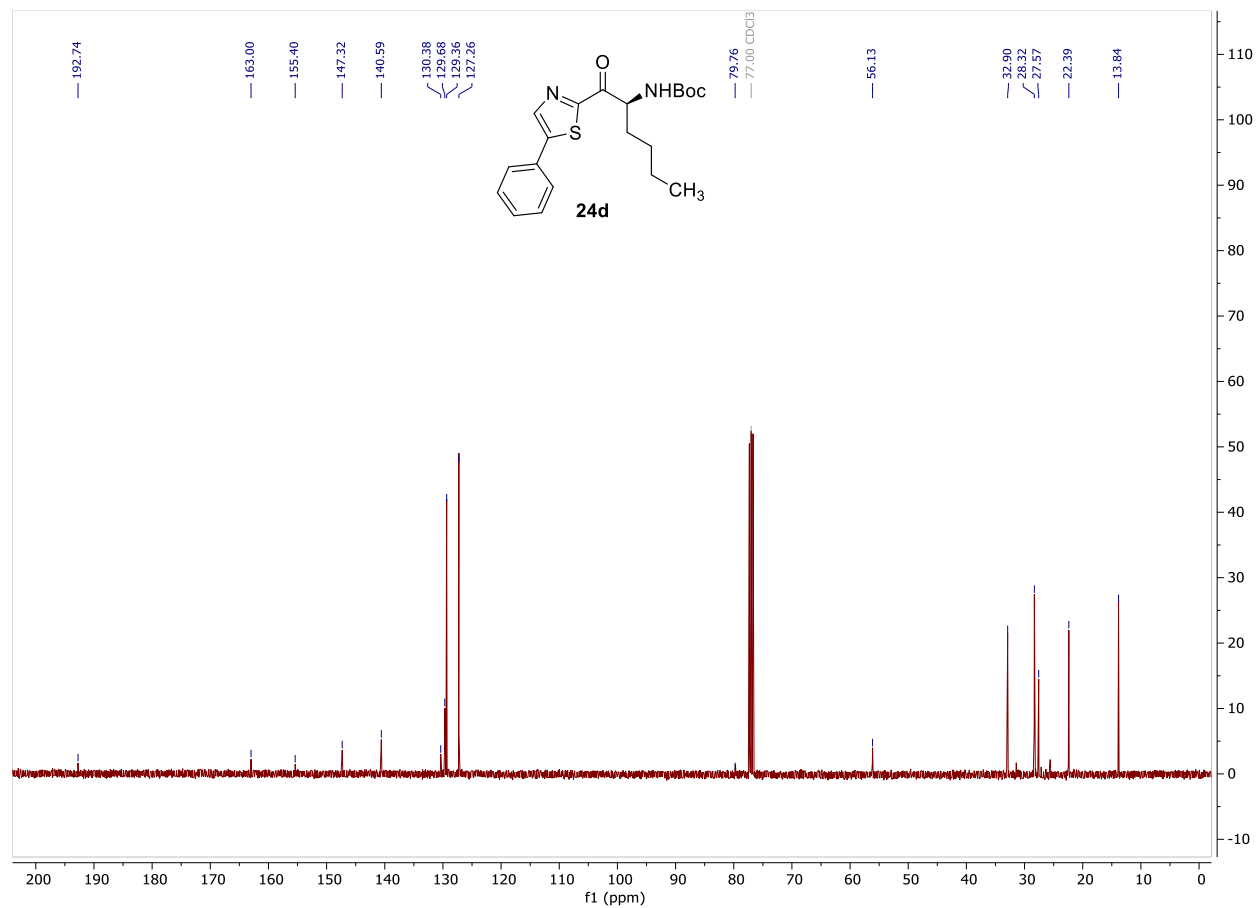

Compound **24e** ( $^1\text{H}$  NMR, 400 MHz):

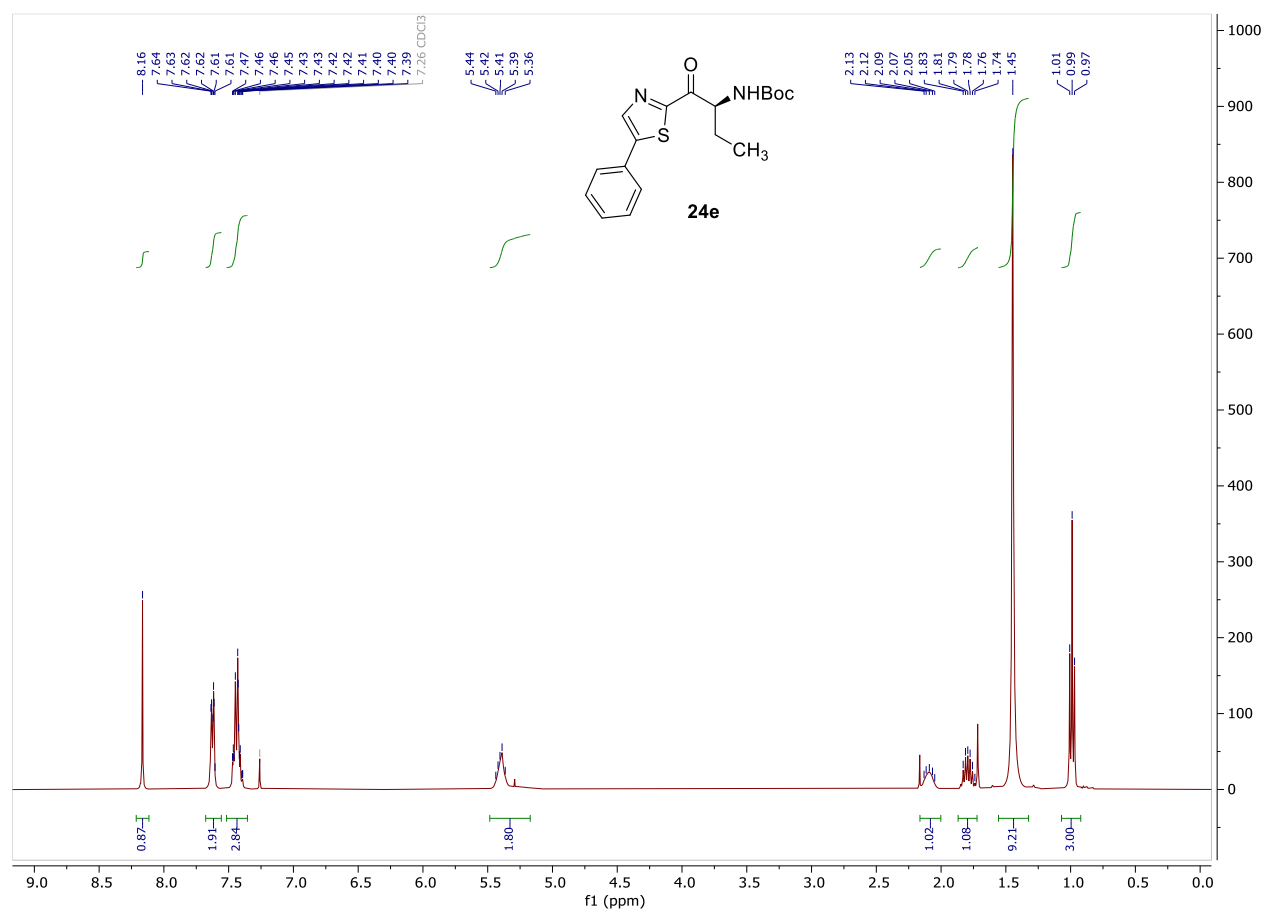

Compound **24e** ( $^{13}\text{C}$  NMR, 101 MHz):

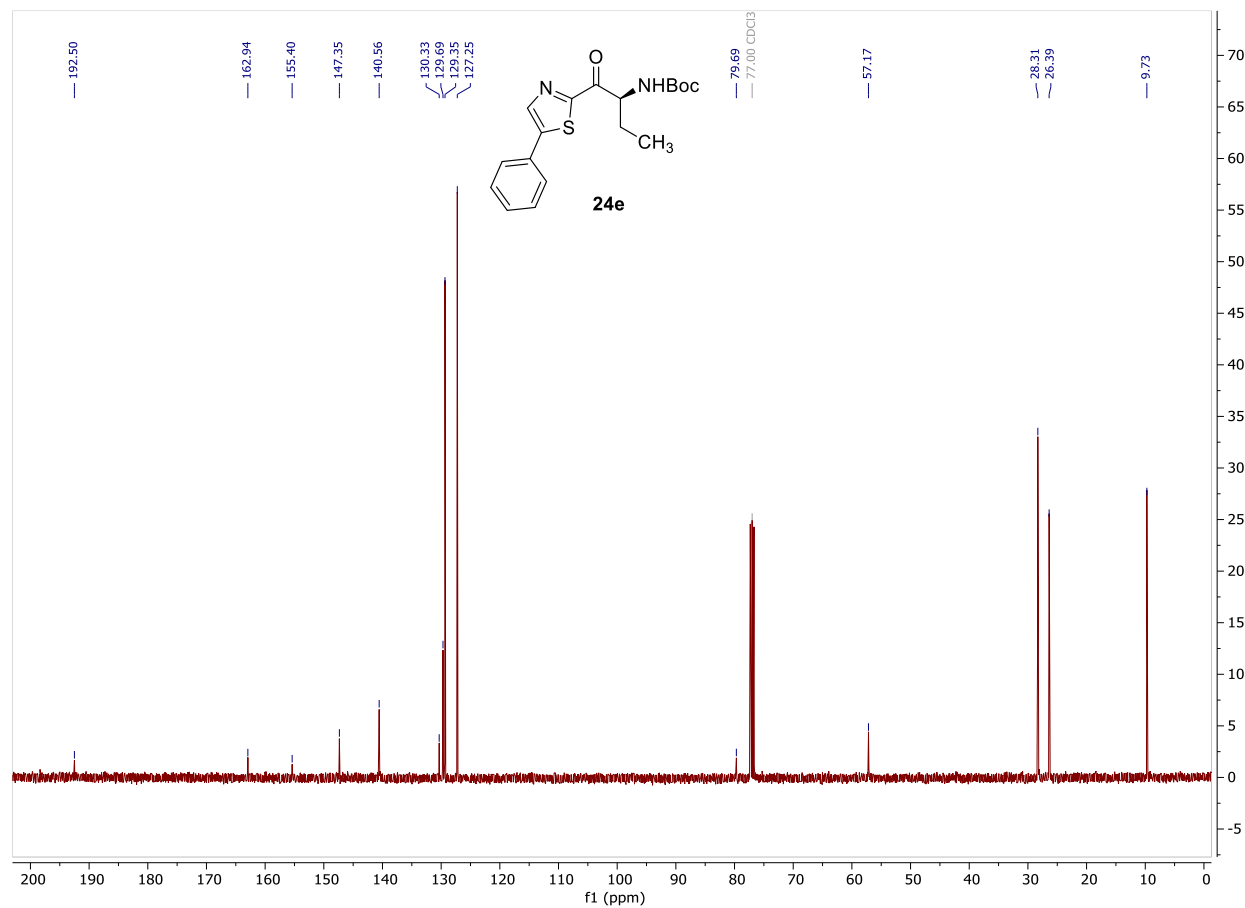

Compound **24f** ( $^1\text{H}$  NMR, 400 MHz):

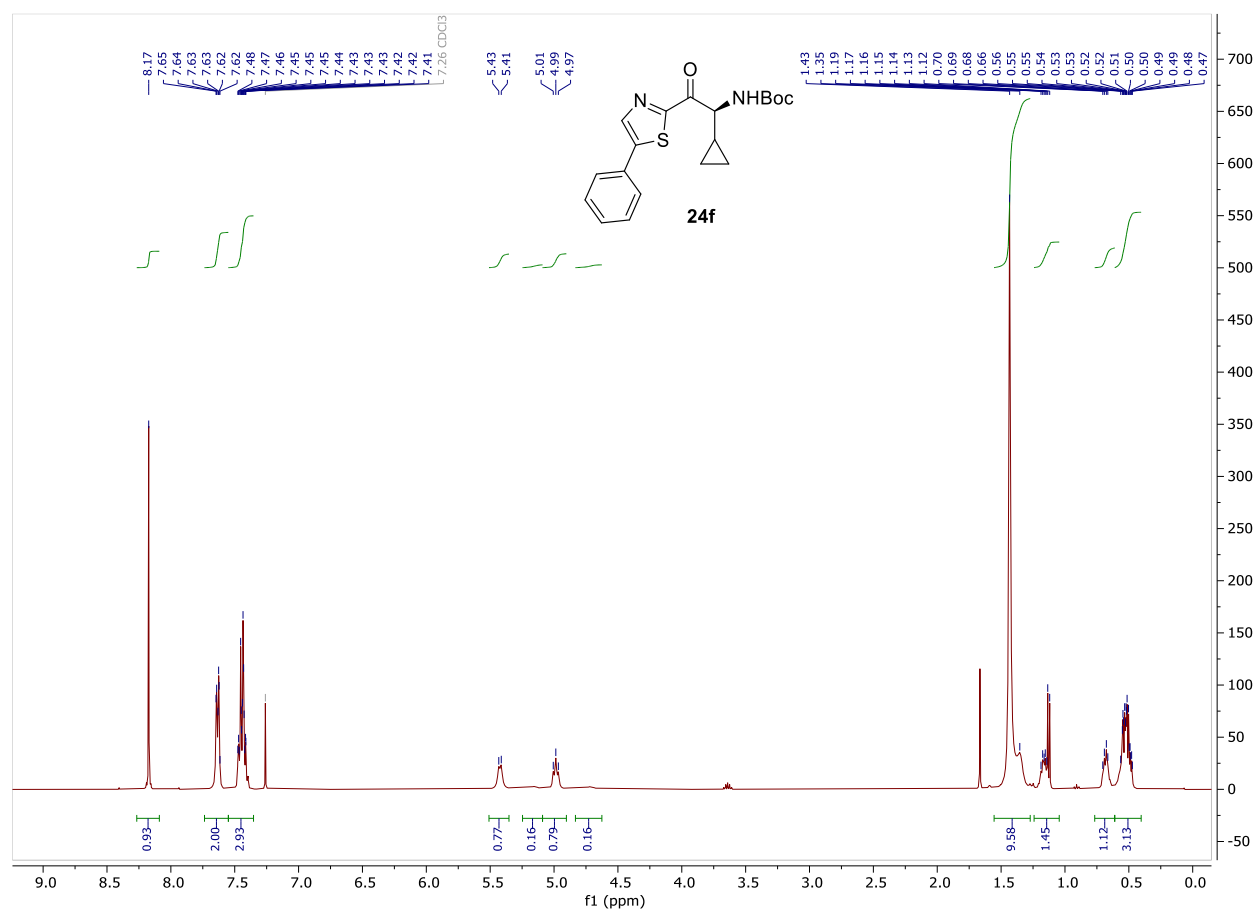

Compound **24f** ( $^{13}\text{C}$  NMR, 101 MHz):

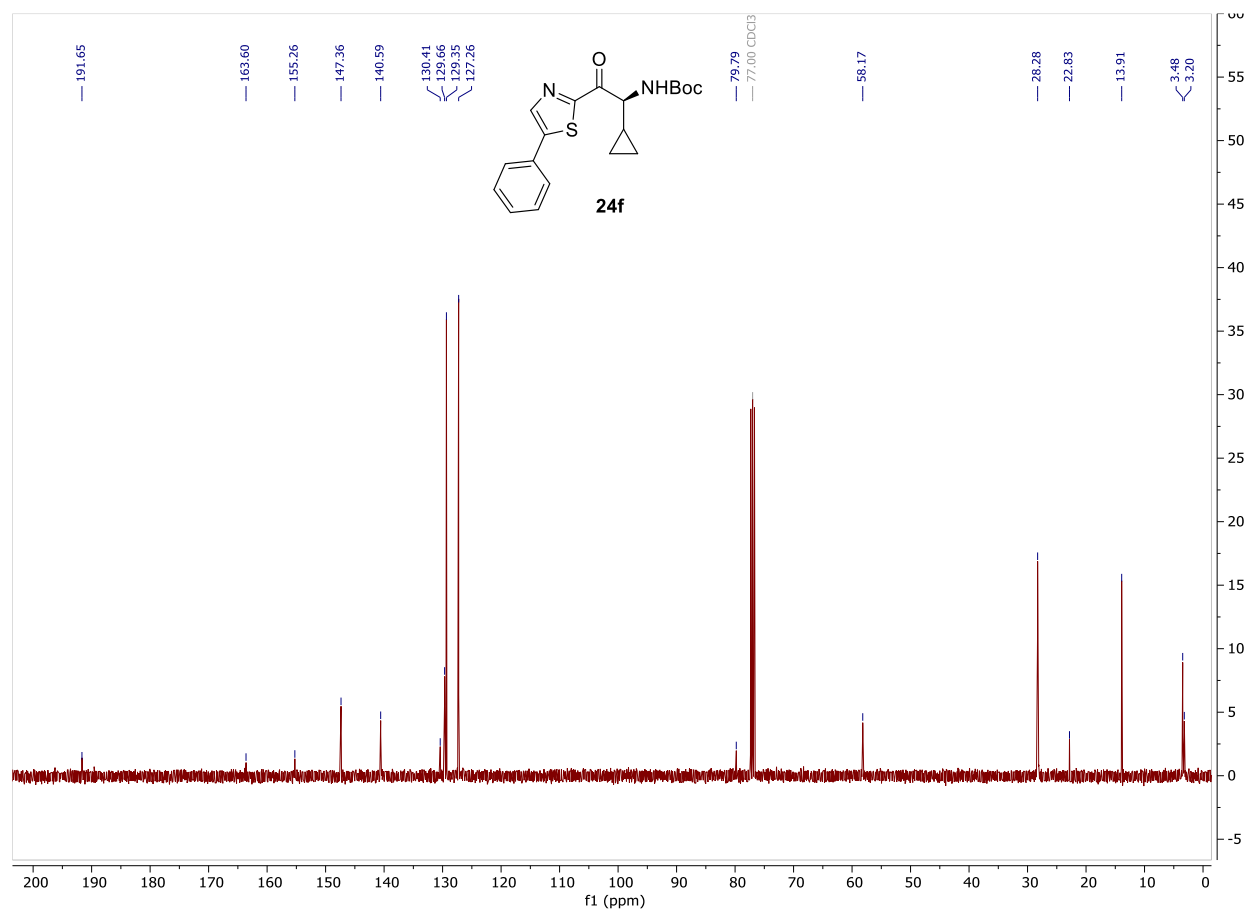



Compound **39a** ( $^1\text{H}$  NMR, 400 MHz):

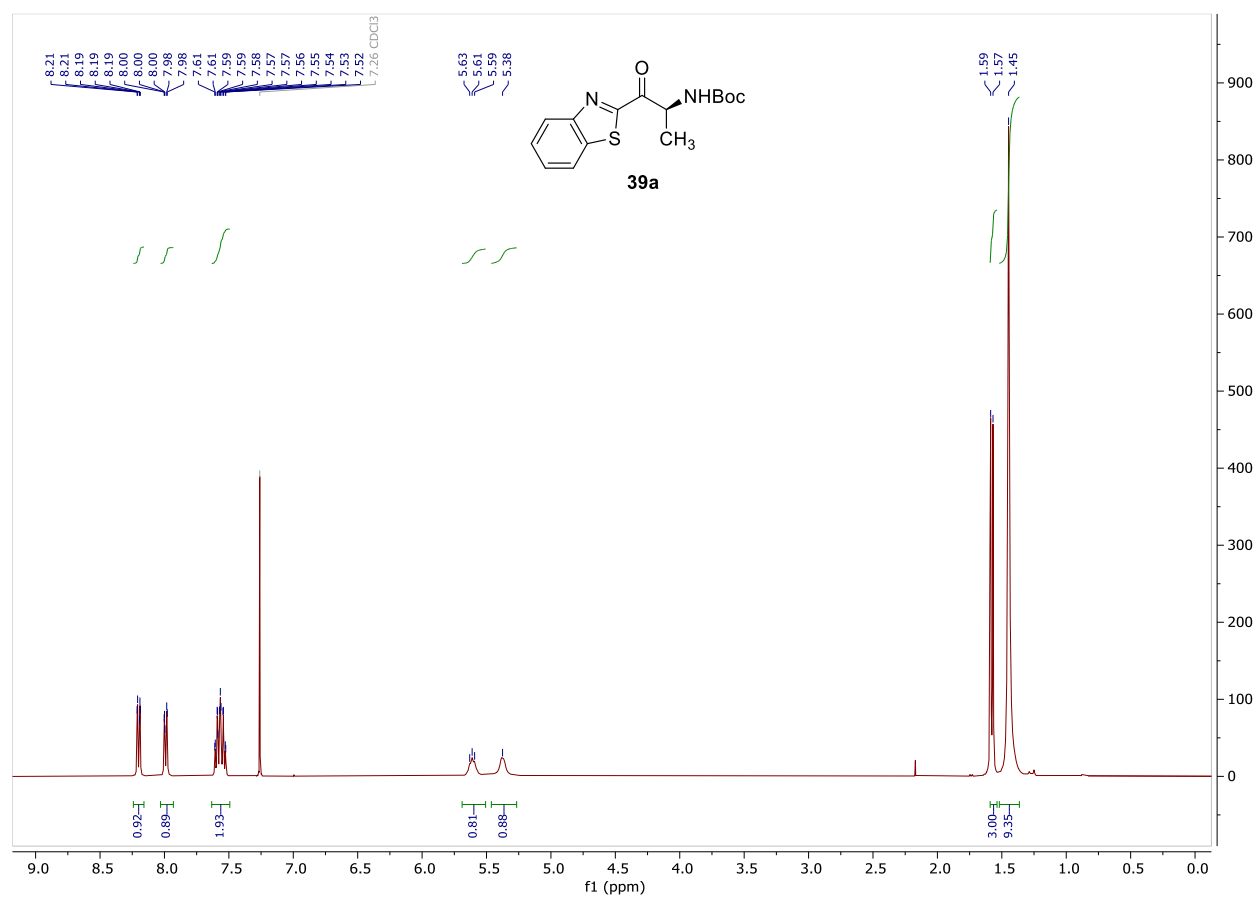

Compound **39a** ( $^{13}\text{C}$  NMR, 101 MHz):

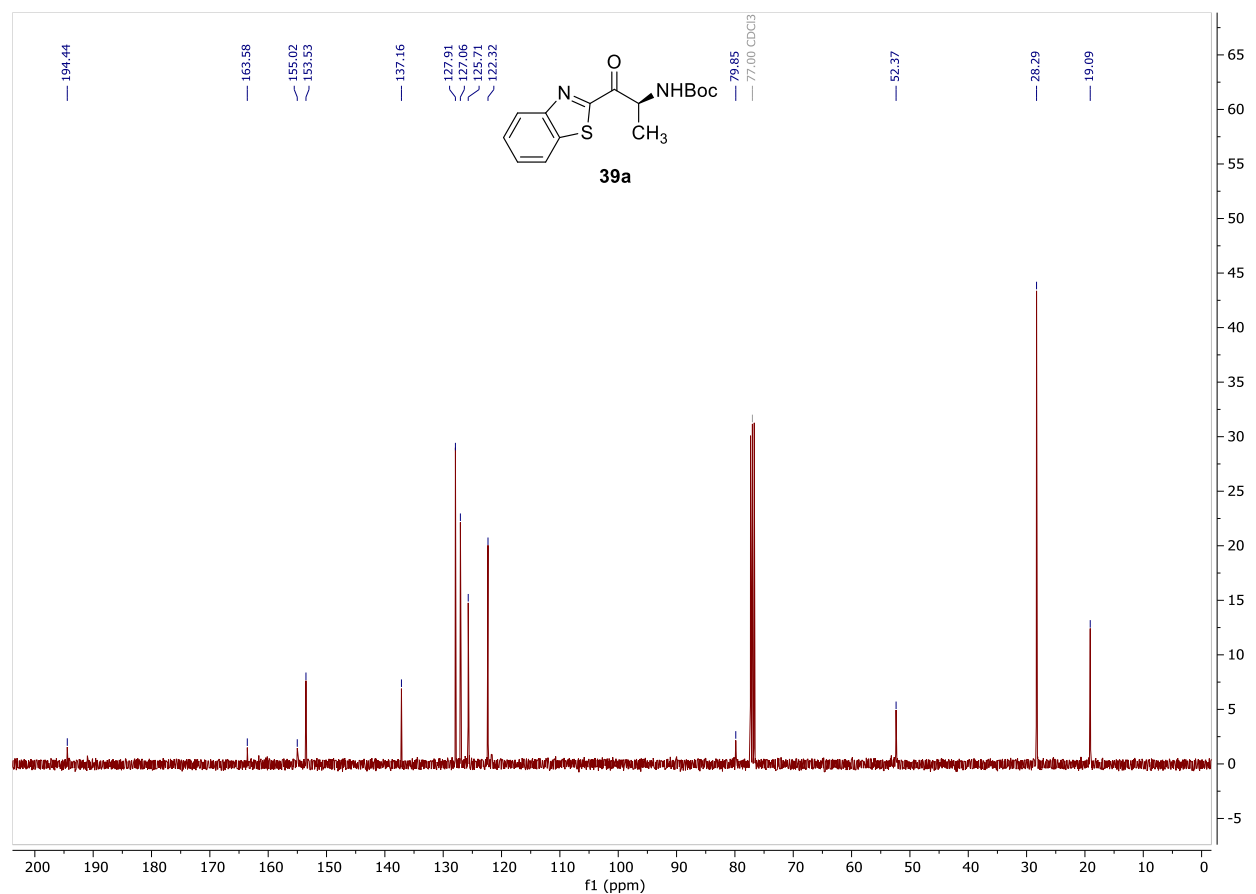

Compound **39b** ( $^1\text{H}$  NMR, 400 MHz):

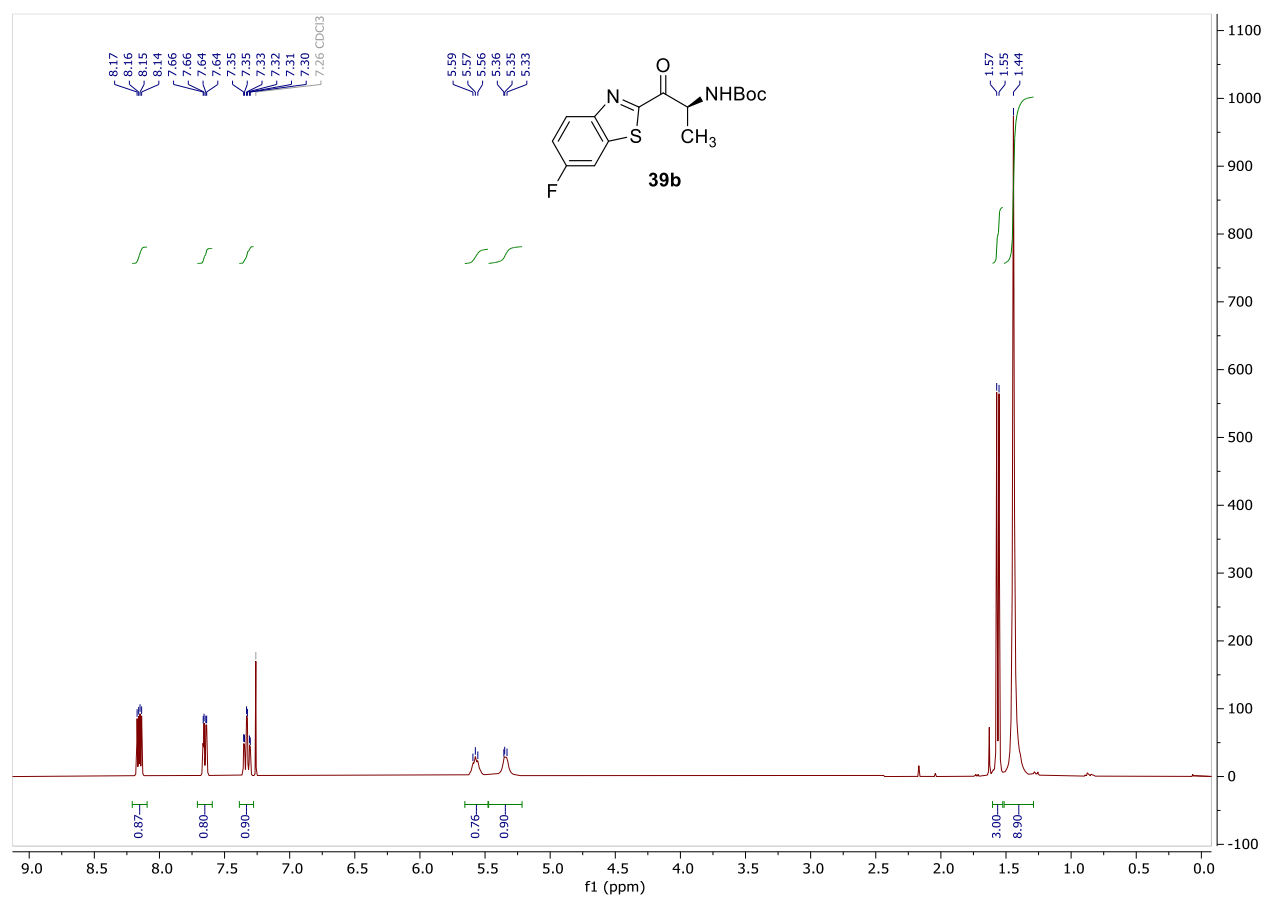

Compound **39b** ( $^{13}\text{C}$  NMR, 101 MHz):

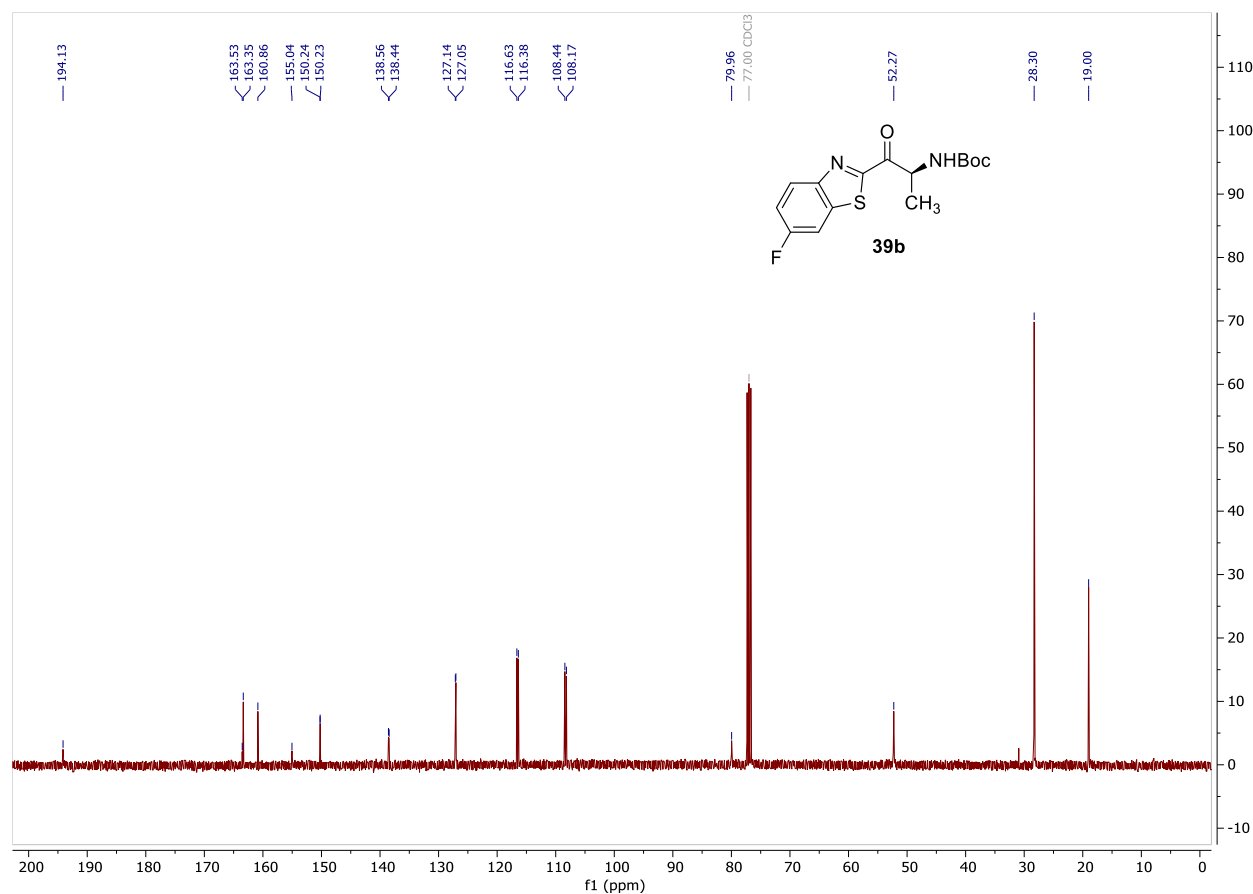

Compound **39b** ( $^{19}\text{F}$  NMR, 282 MHz):

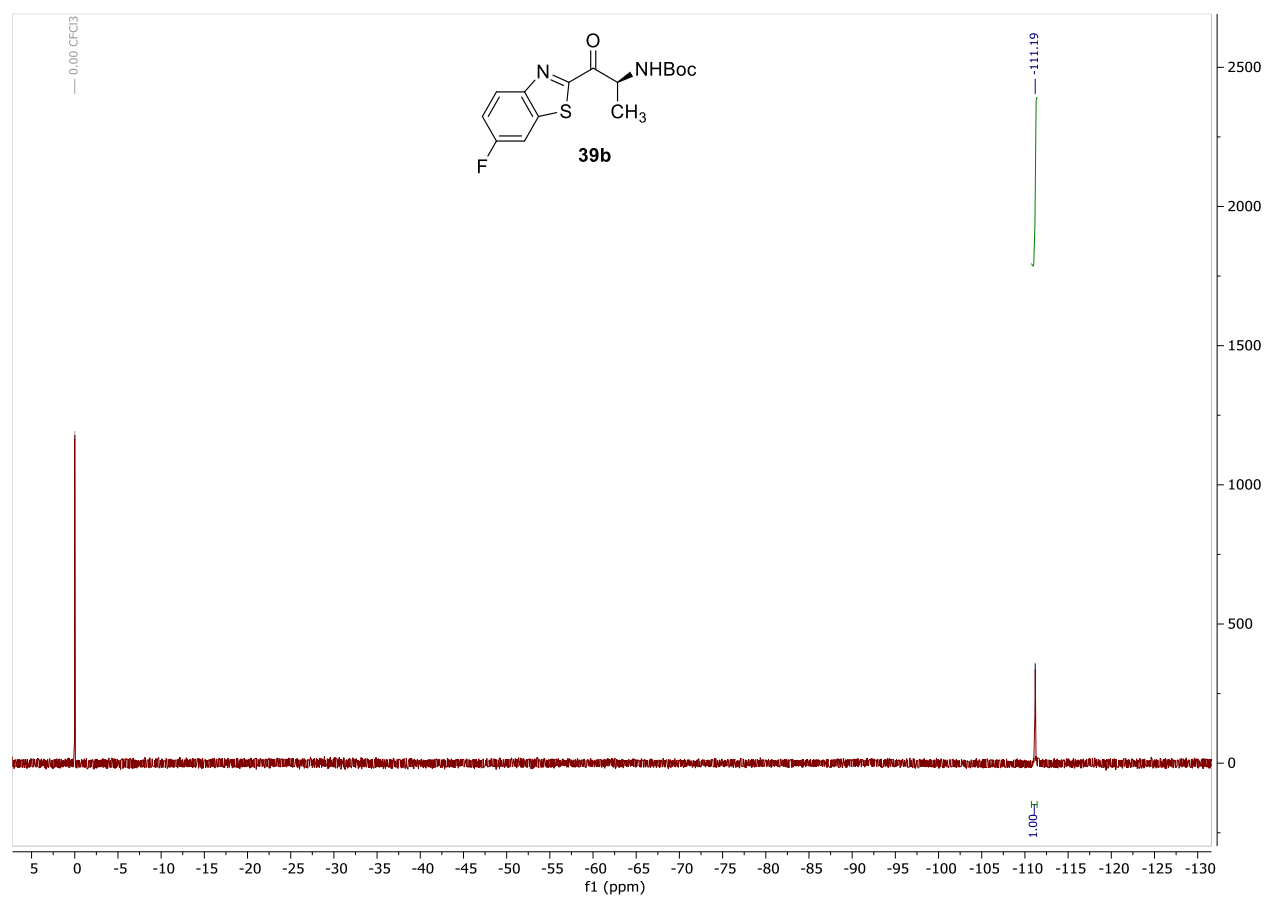

Compound **39c** ( $^1\text{H}$  NMR, 400 MHz):

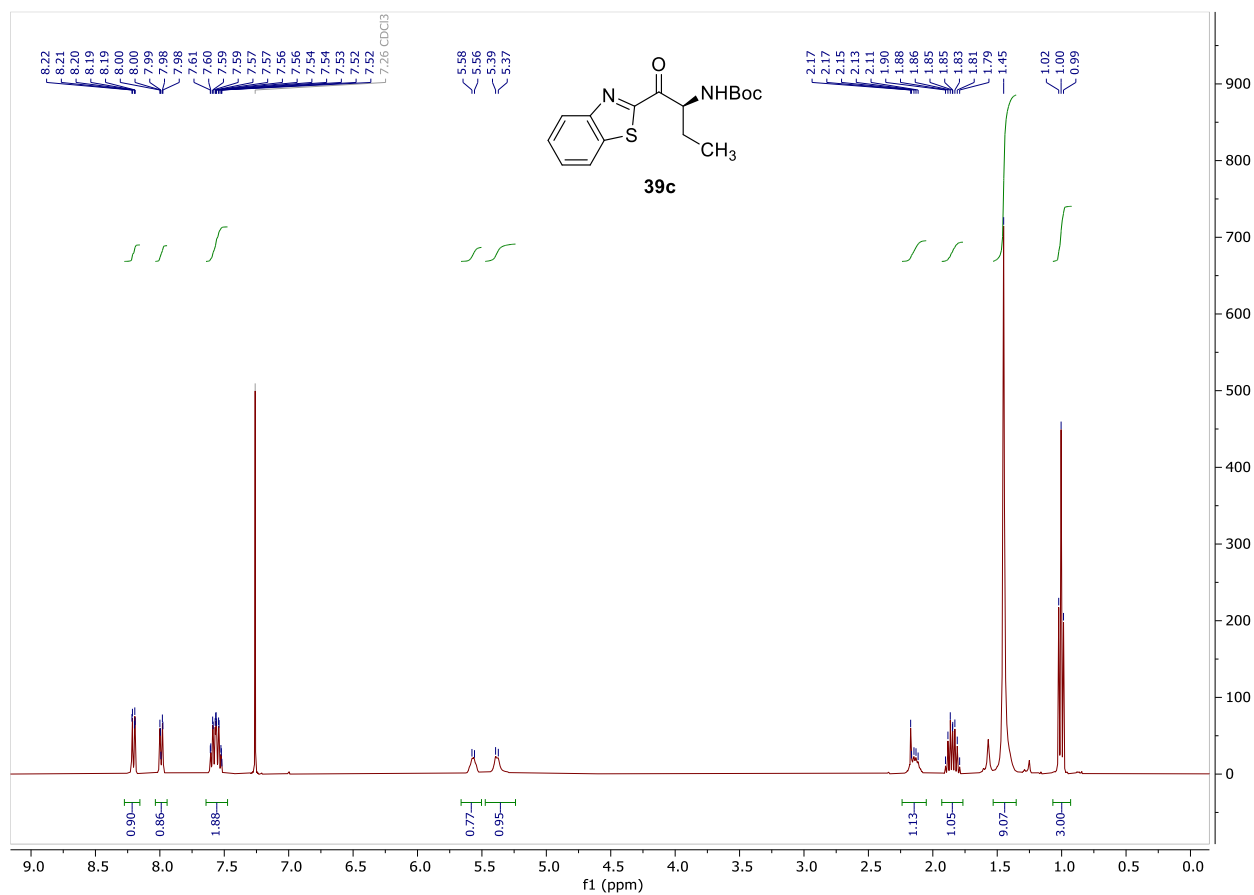

Compound **39c** ( $^{13}\text{C}$  NMR, 101 MHz):

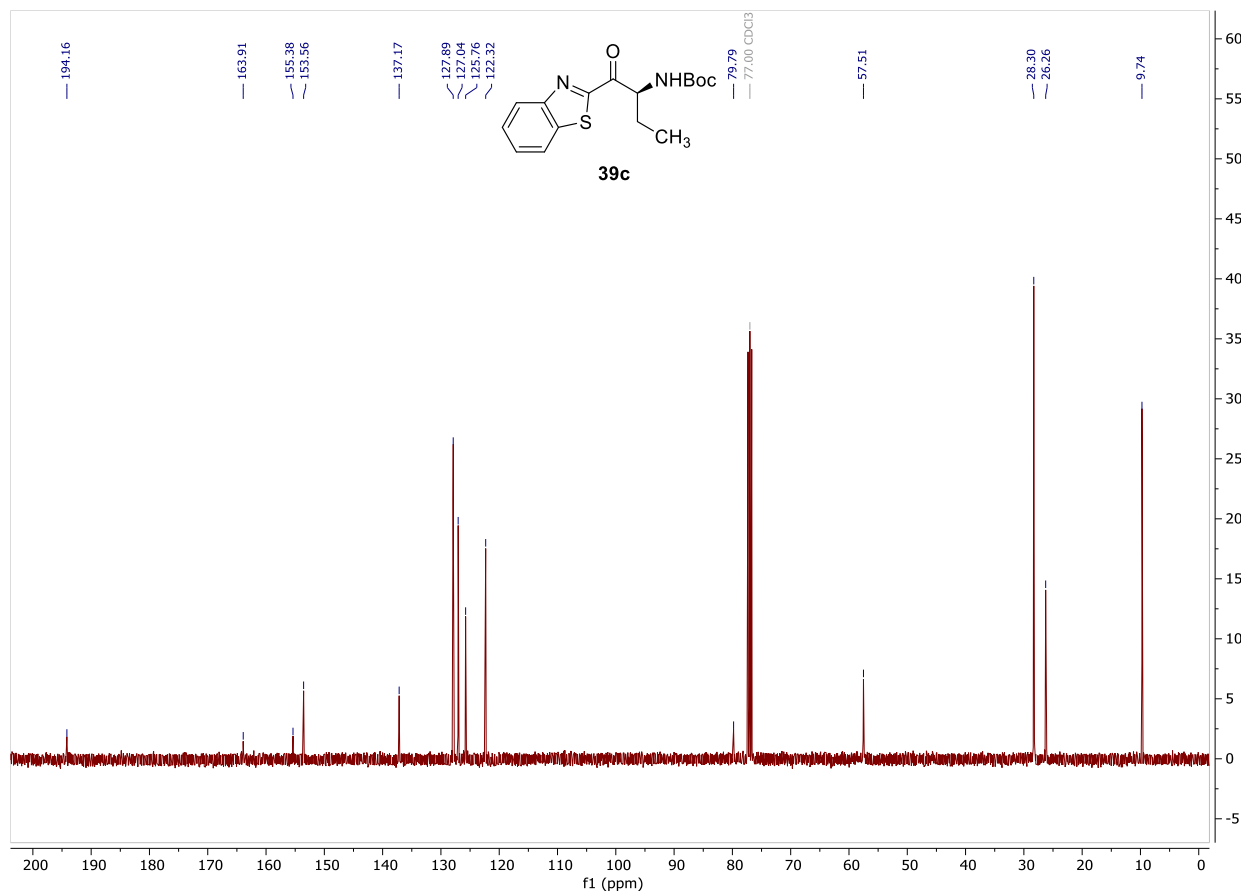

Compound **39d** ( $^1\text{H}$  NMR, 400 MHz):

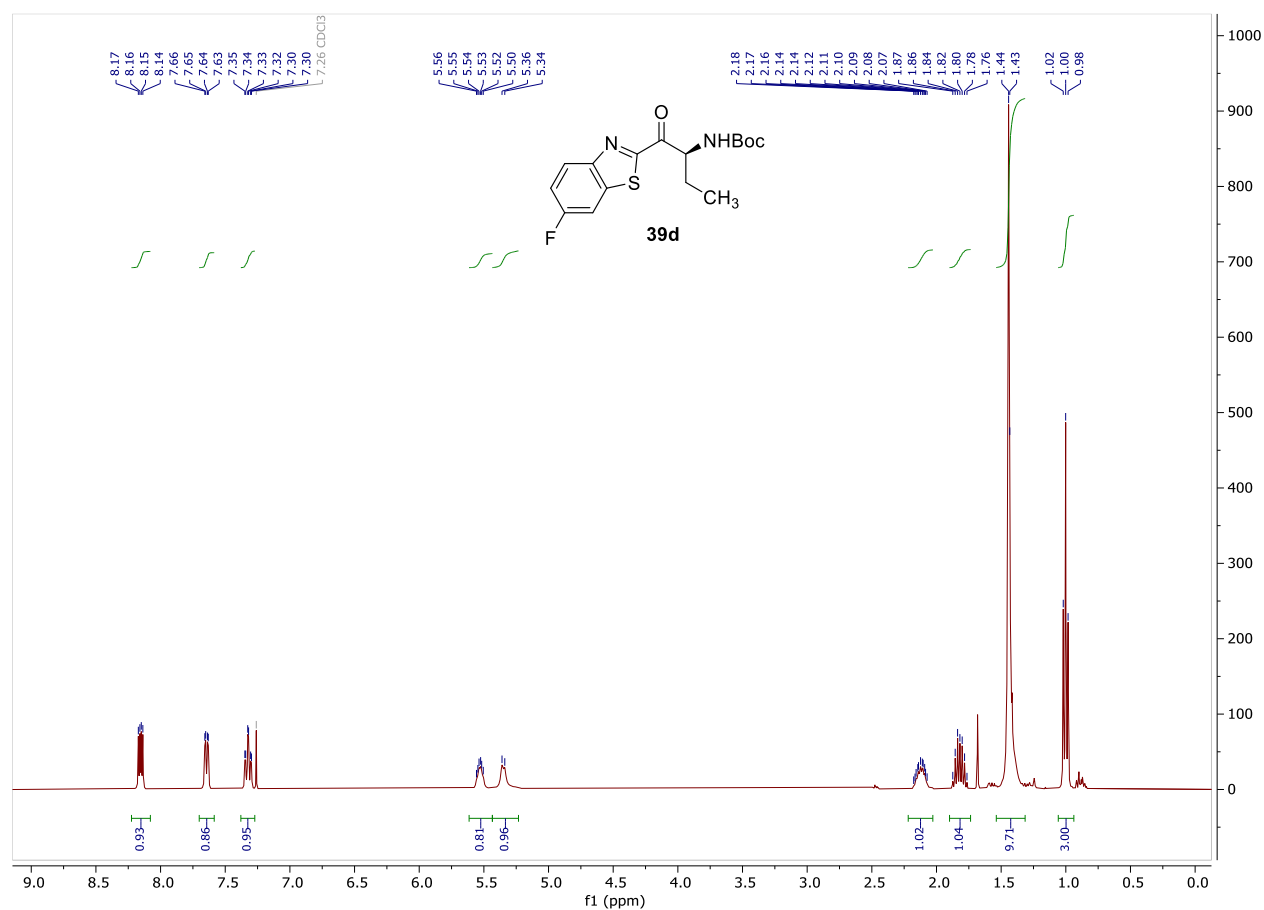

Compound **39d** ( $^{13}\text{C}$  NMR, 101 MHz):

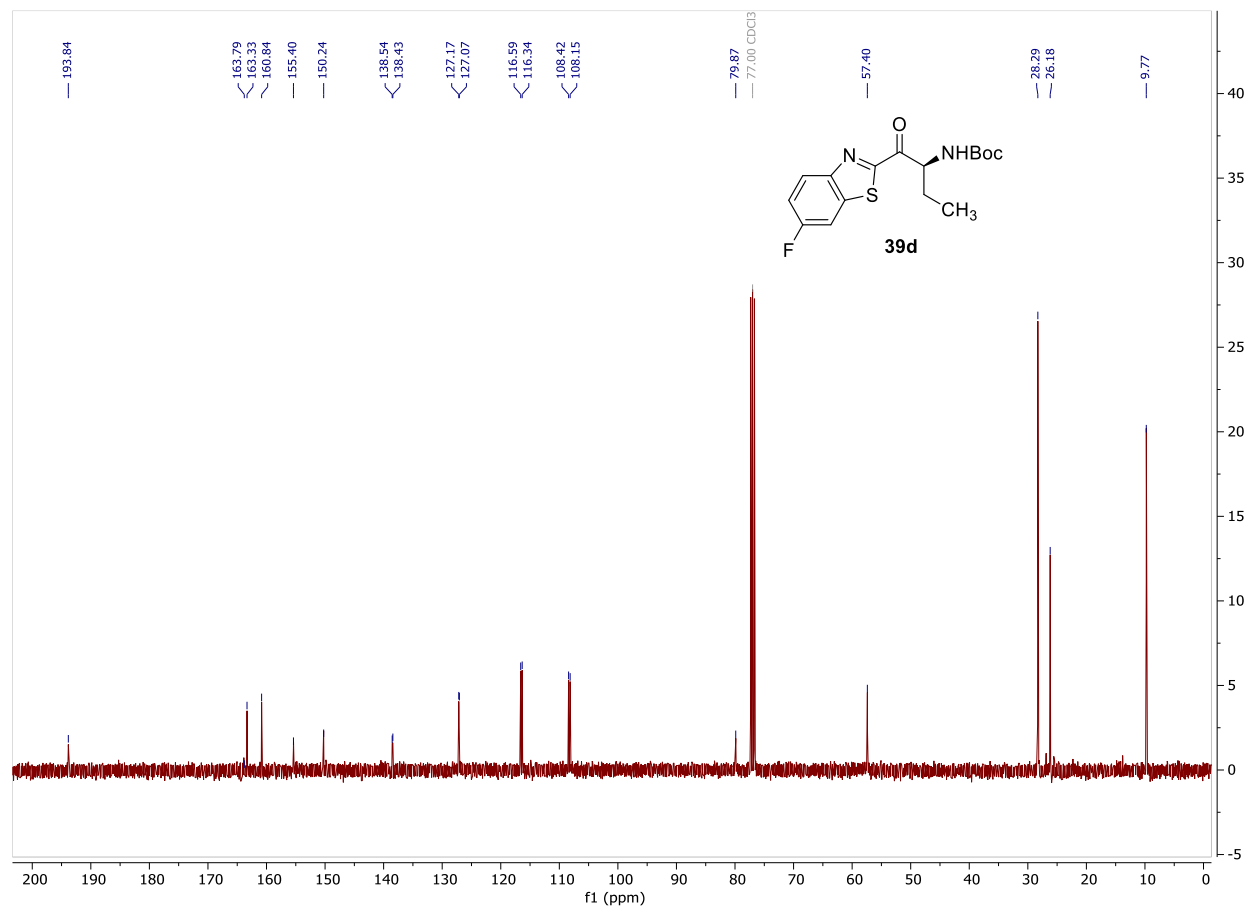

Compound **39d** ( $^{19}\text{F}$  NMR, 282 MHz):

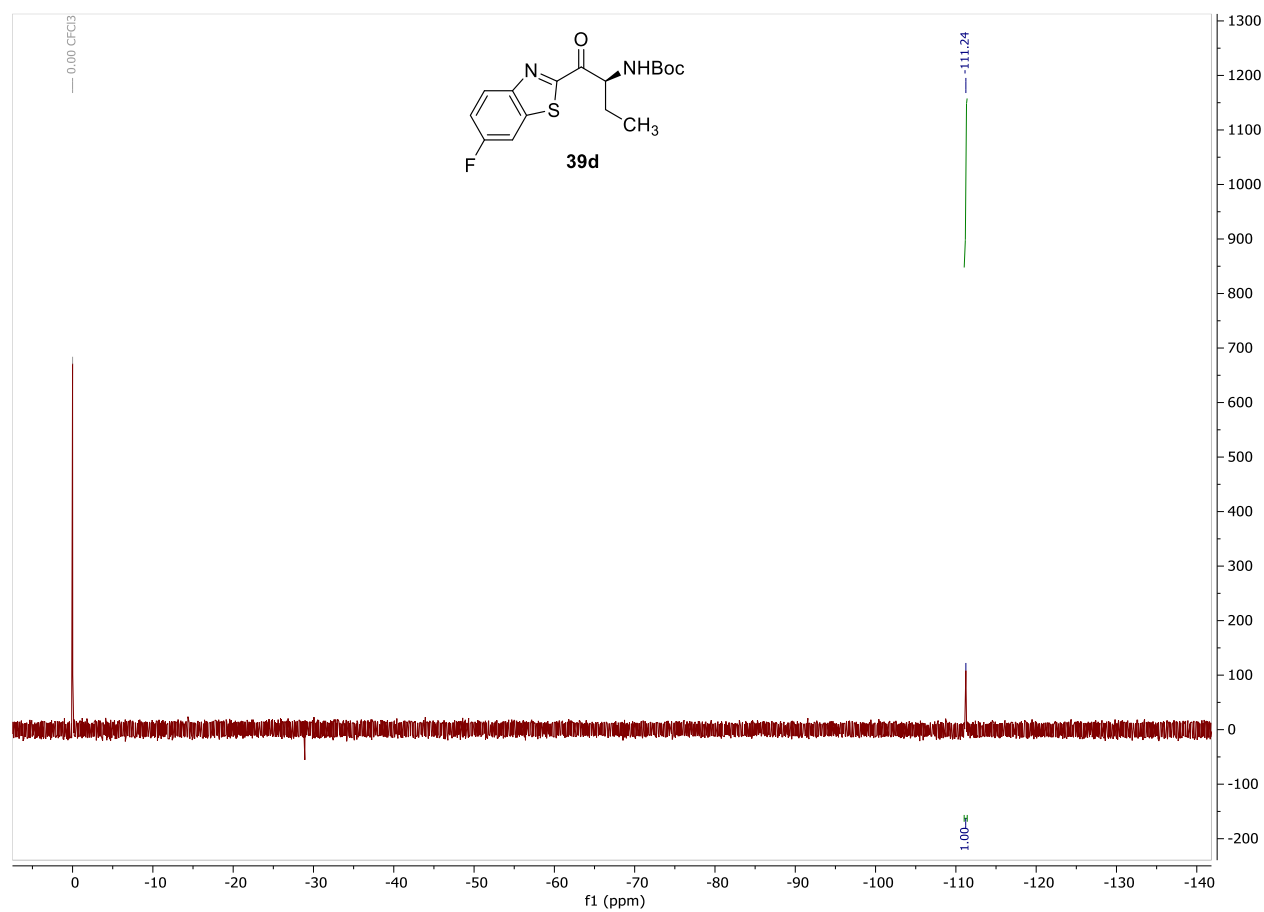

Compound **42b** ( $^1\text{H}$  NMR, 400 MHz):

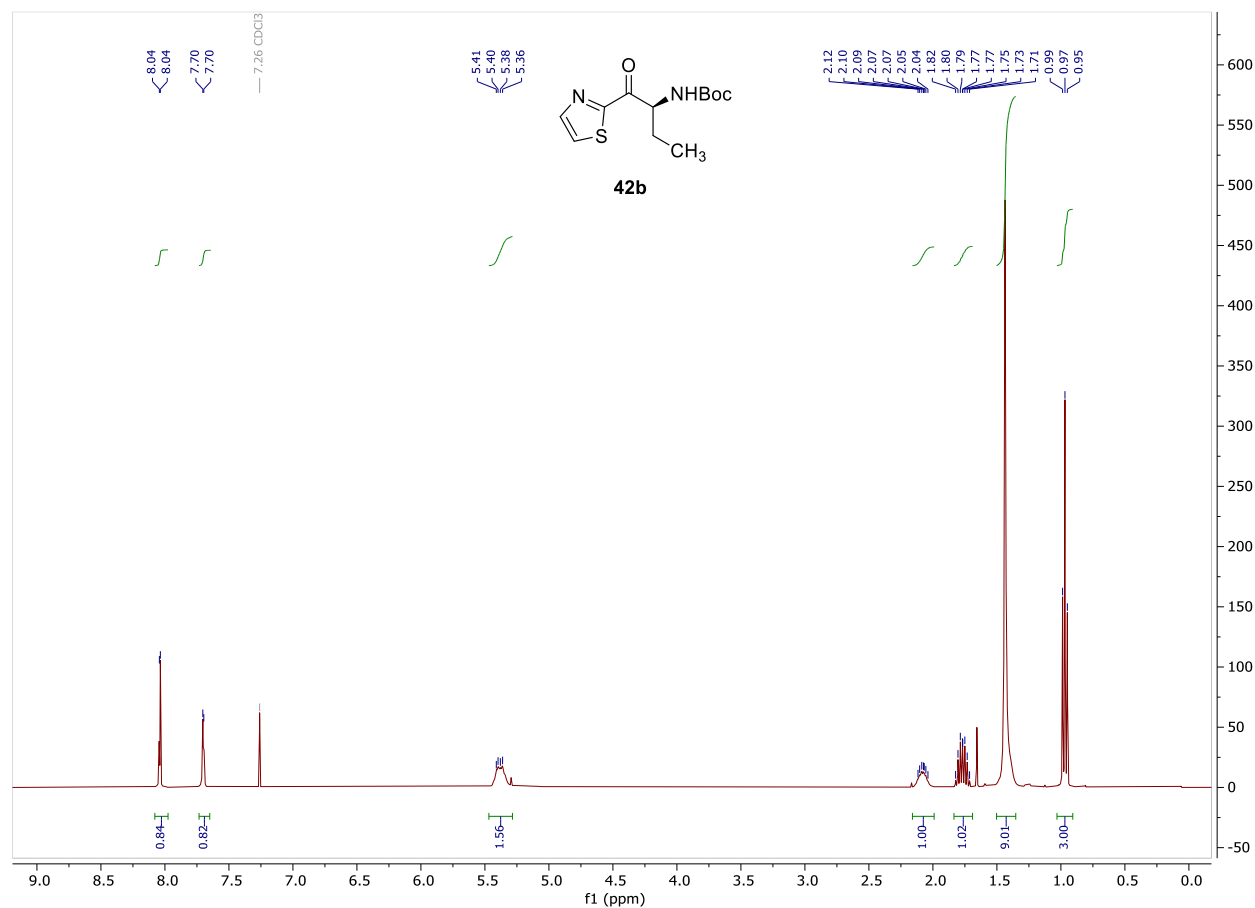

Compound **42b** ( $^{13}\text{C}$  NMR, 101 MHz):

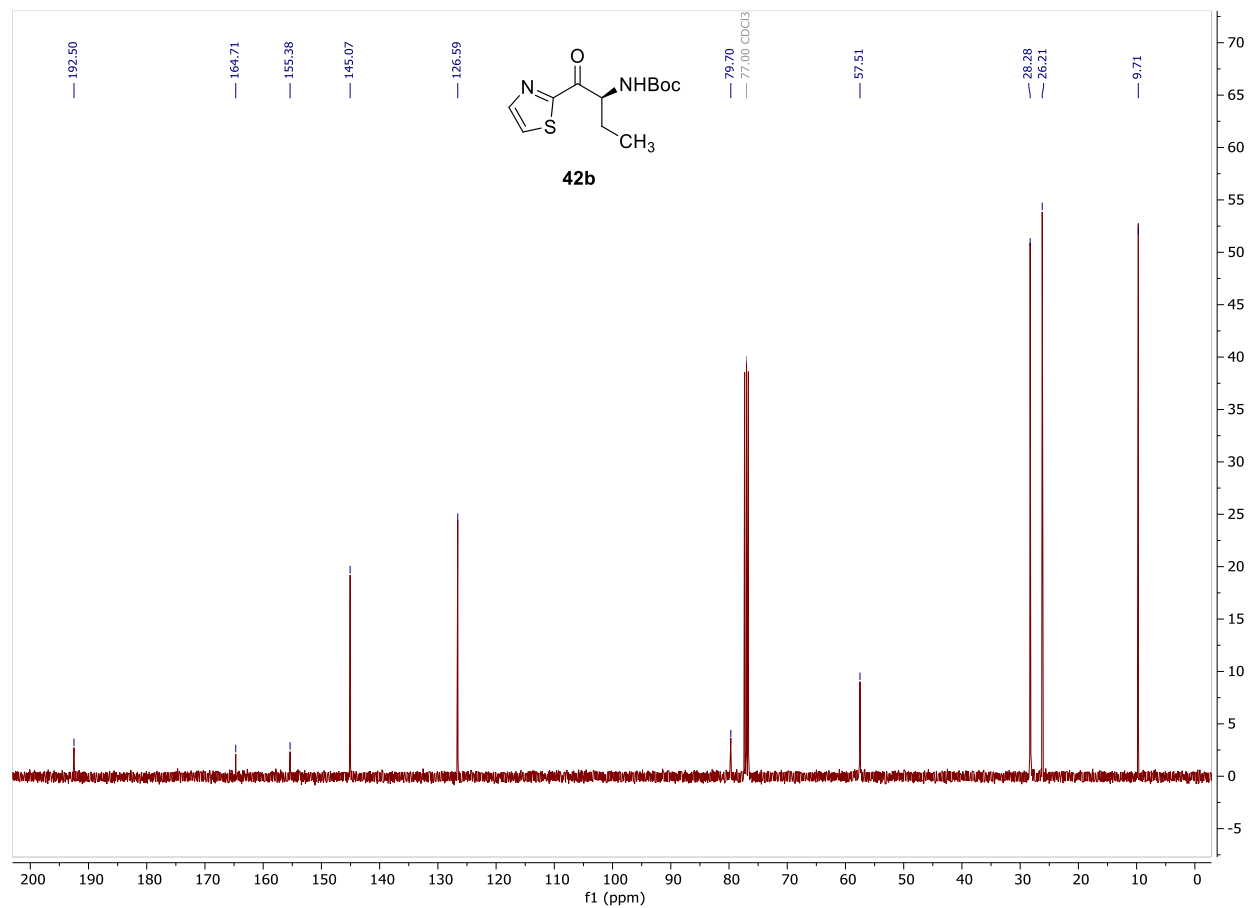

Compound **43a** ( $^1\text{H}$  NMR, 400 MHz):

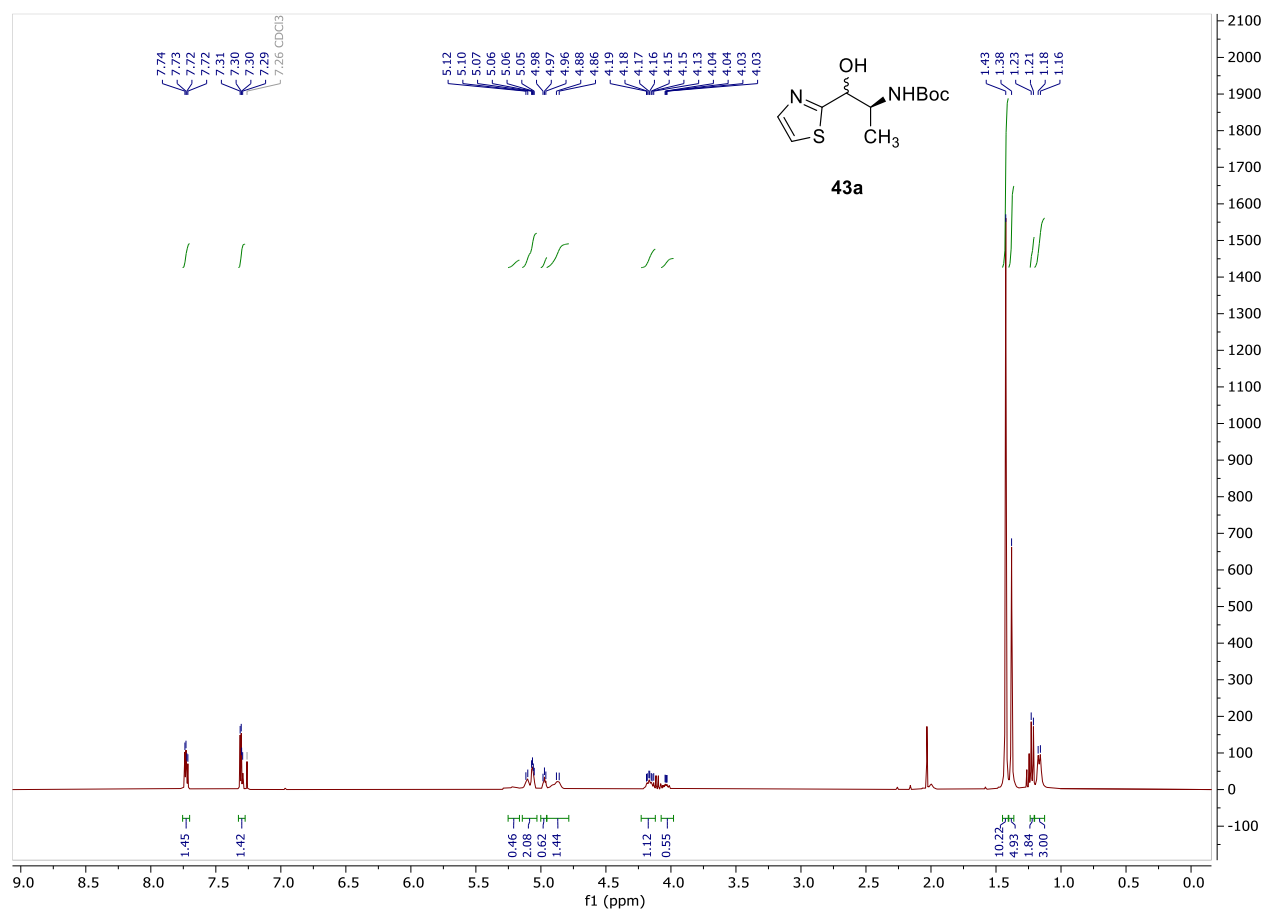

Compound **43a** ( $^{13}\text{C}$  NMR, 101 MHz):

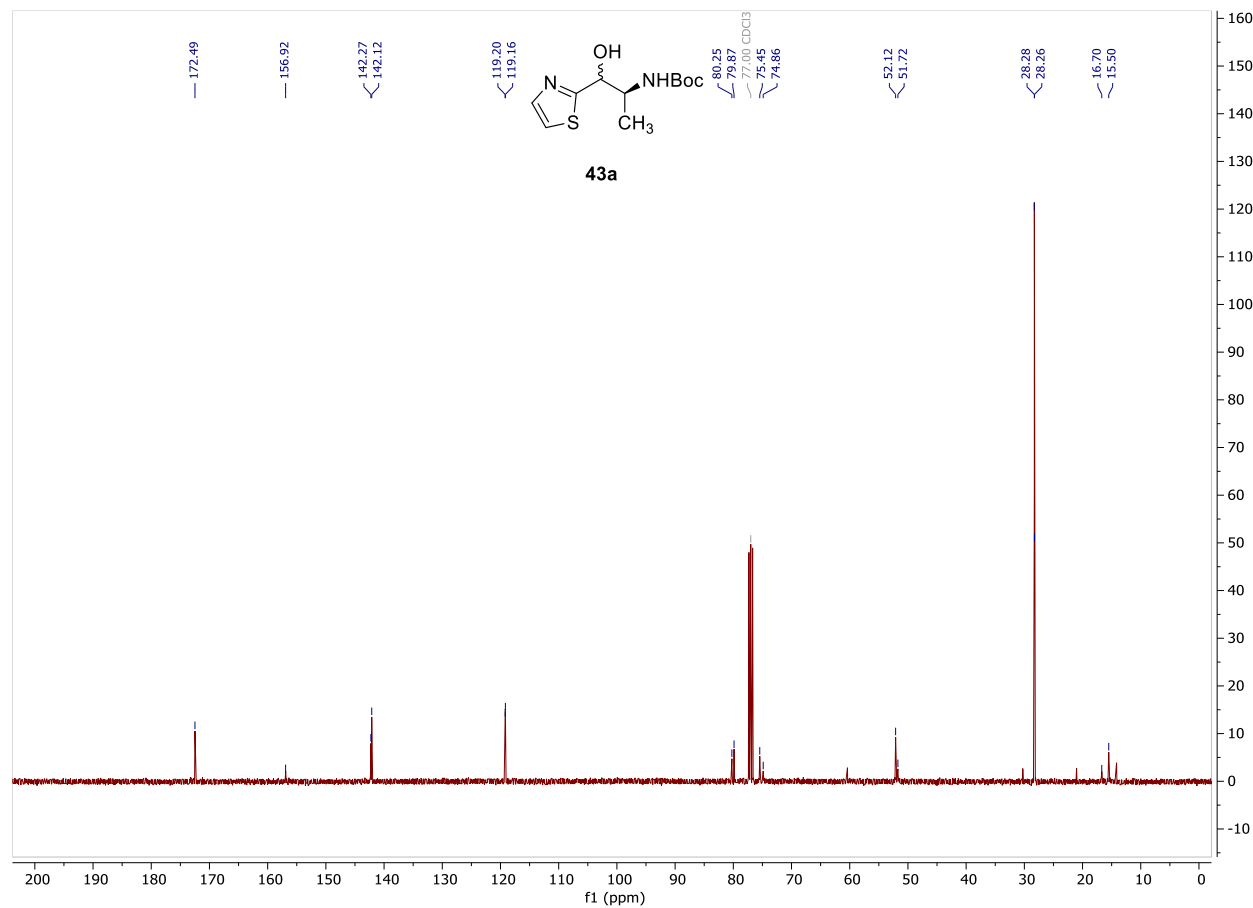



Compound **43b** ( $^1\text{H}$  NMR, 400 MHz):

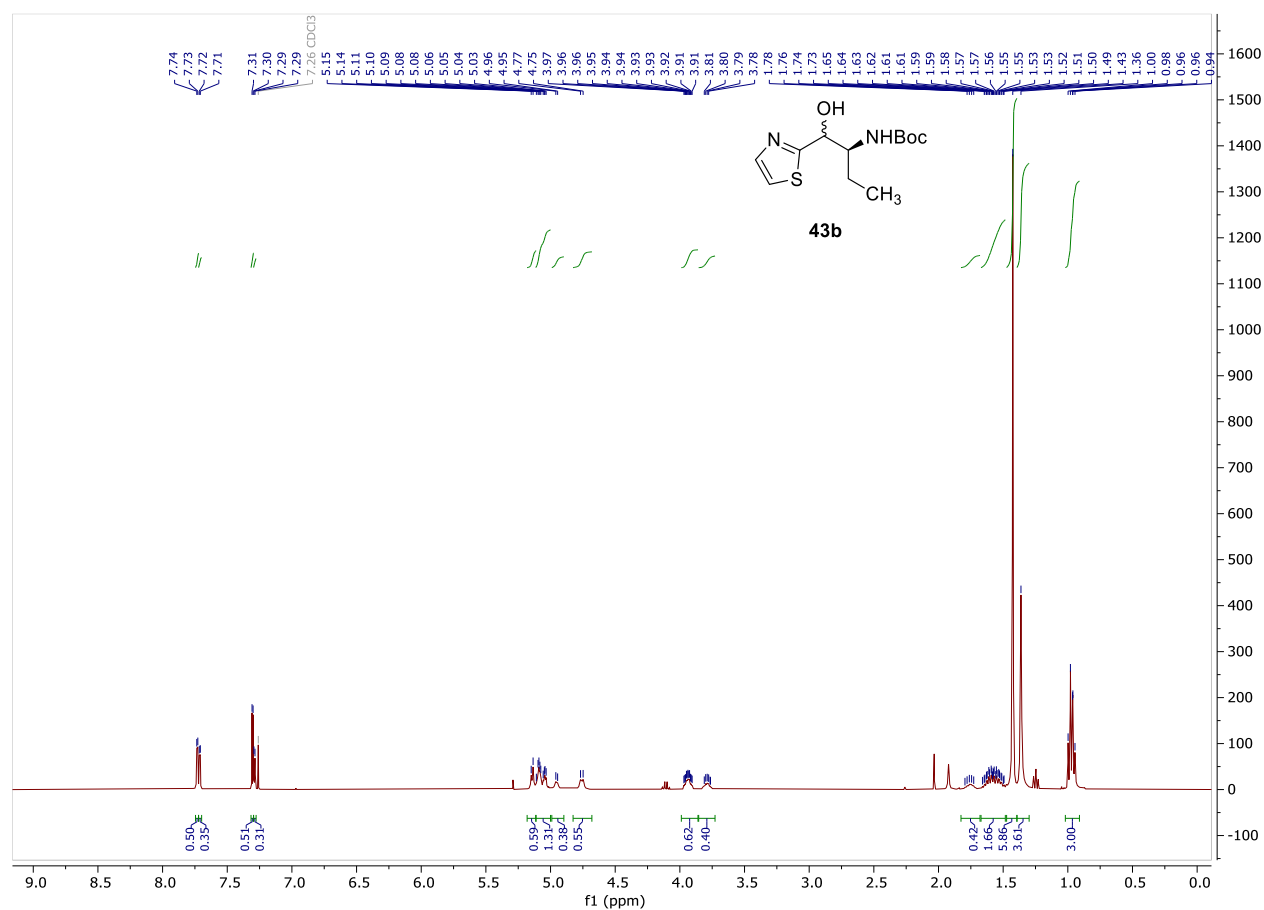

Compound **43b** ( $^{13}\text{C}$  NMR, 101 MHz):

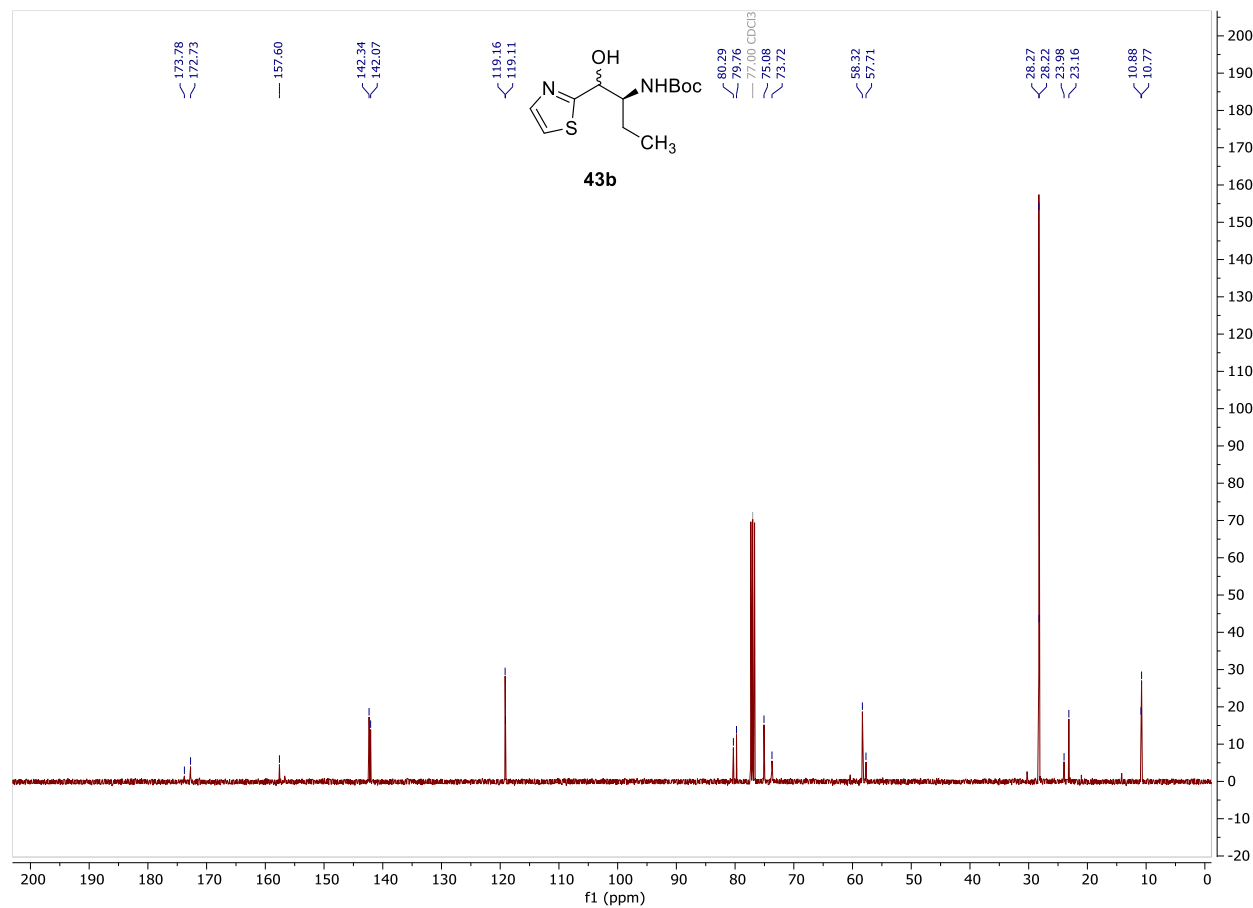

Compound **44a** – major diastereomer ( $^1\text{H}$  NMR, 400 MHz):

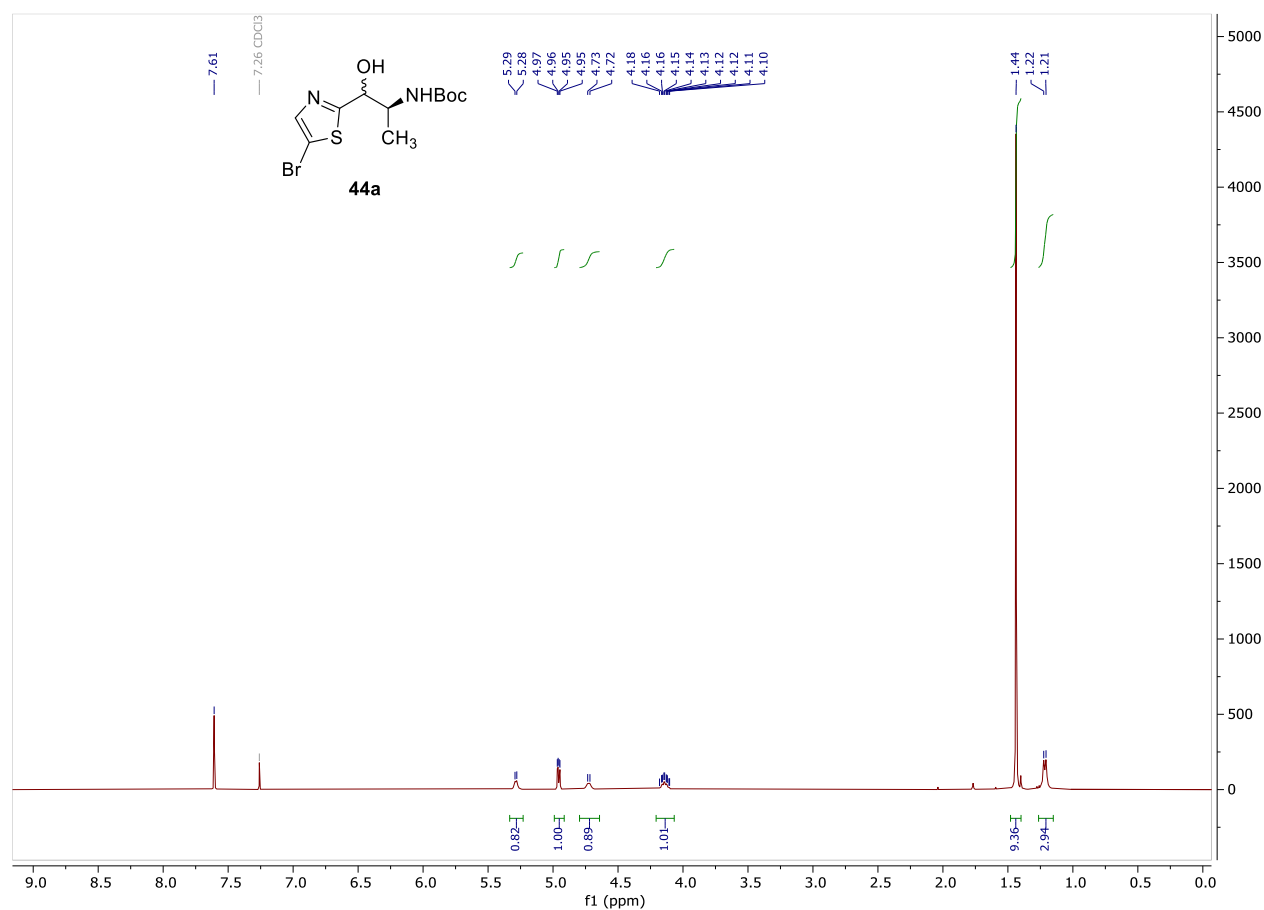

Compound **44a** – major diastereomer ( $^{13}\text{C}$  NMR, 101 MHz):

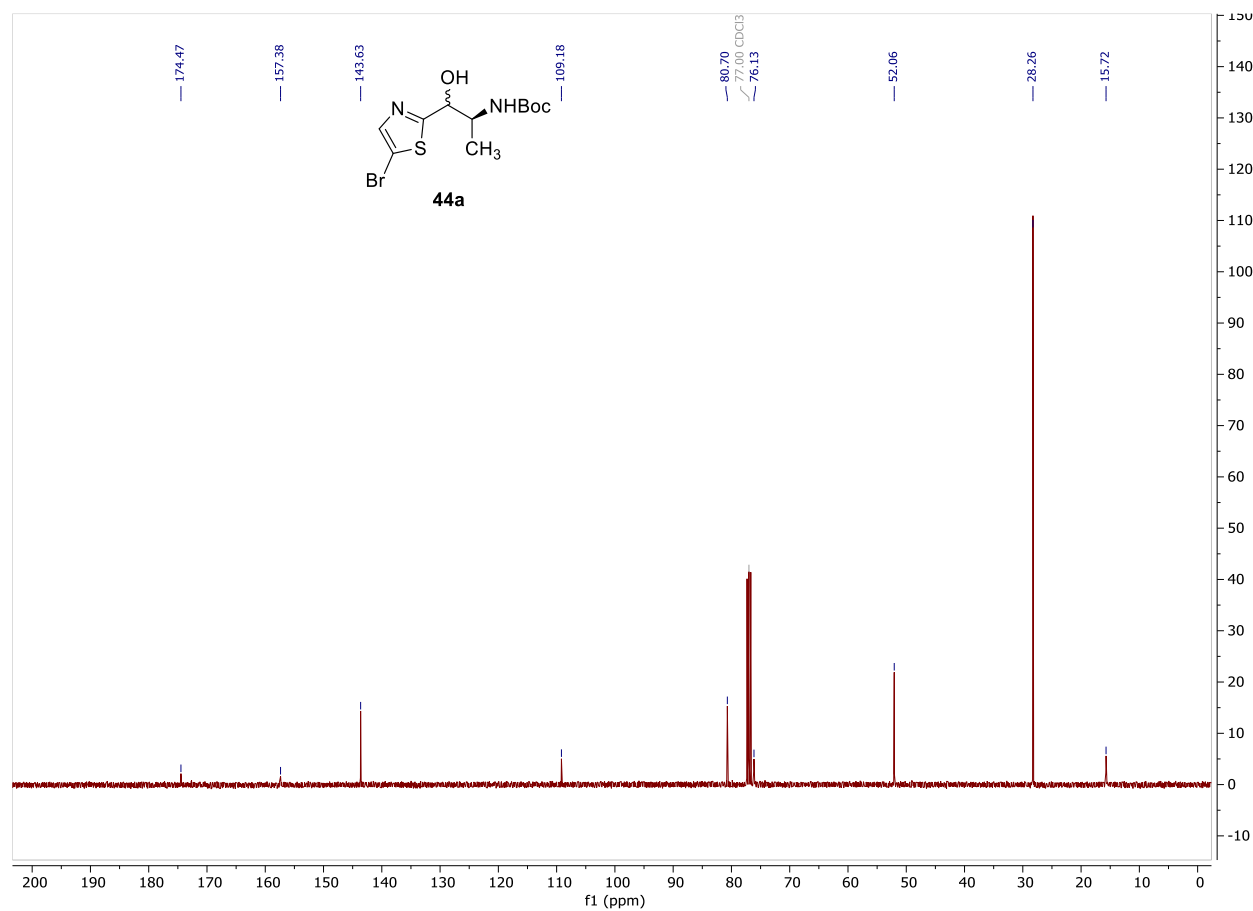

Compound **44a** – minor diastereomer ( $^1\text{H}$  NMR, 400 MHz):

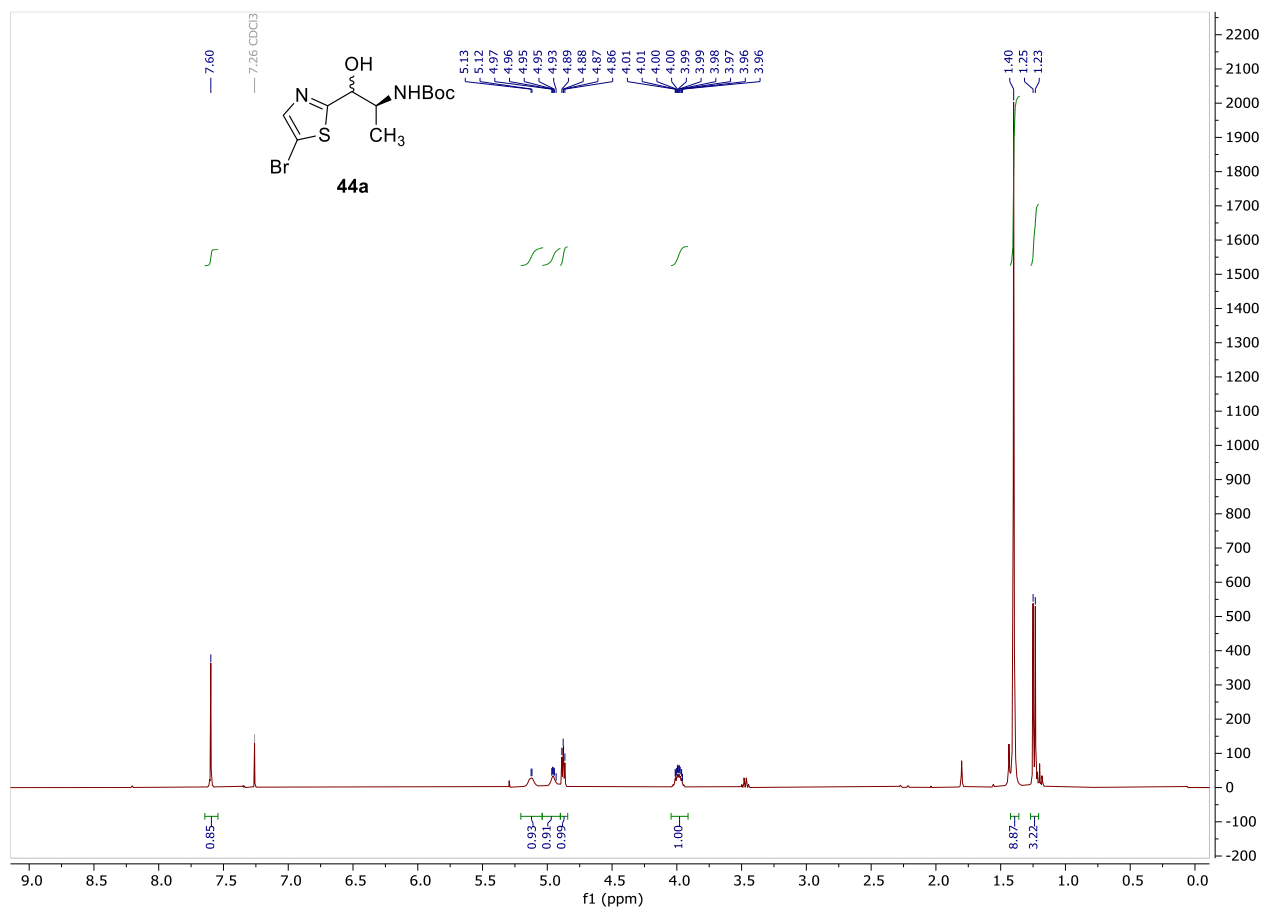

Compound **44a** – minor diastereomer ( $^{13}\text{C}$  NMR, 101 MHz):

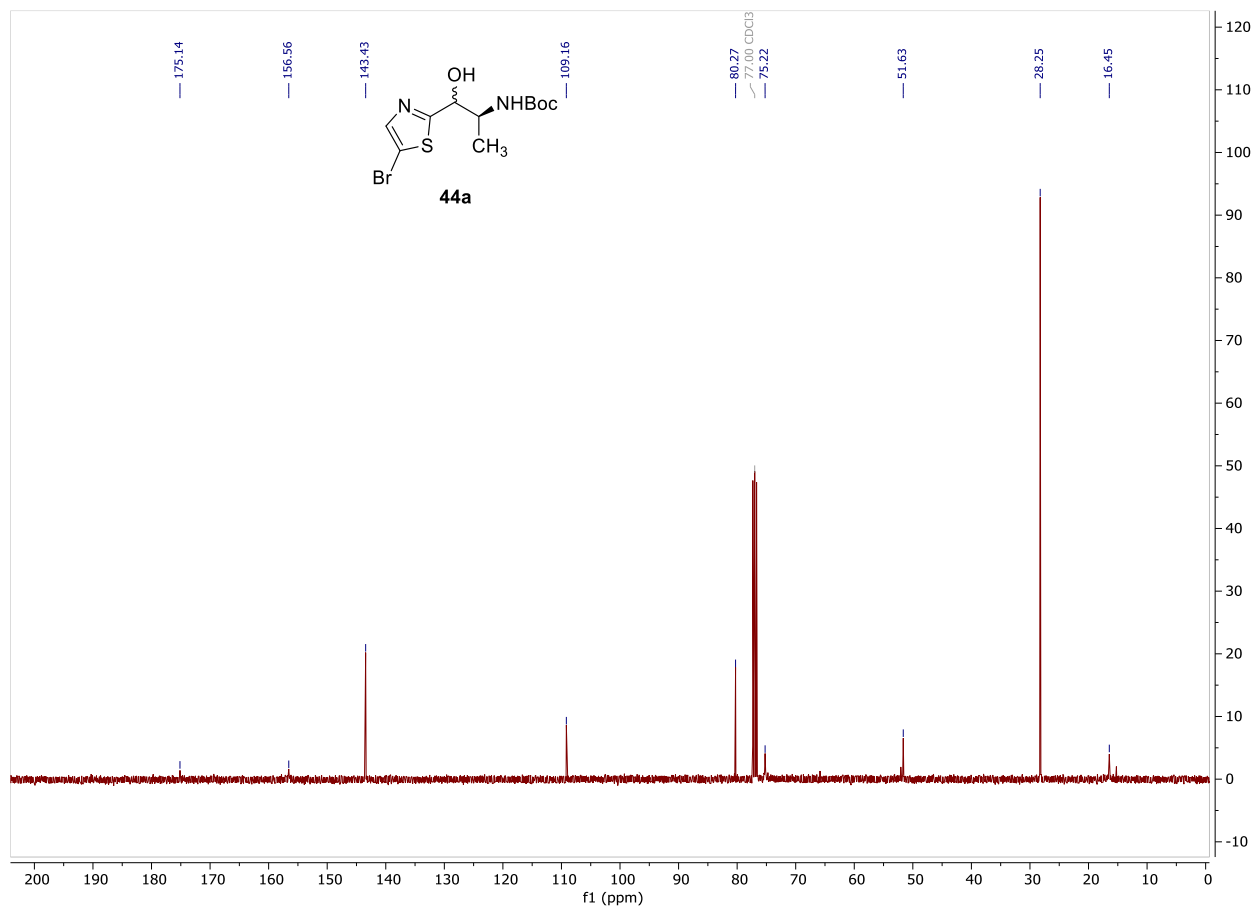

Compound **44b** – major diastereomer ( $^1\text{H}$  NMR, 400 MHz):

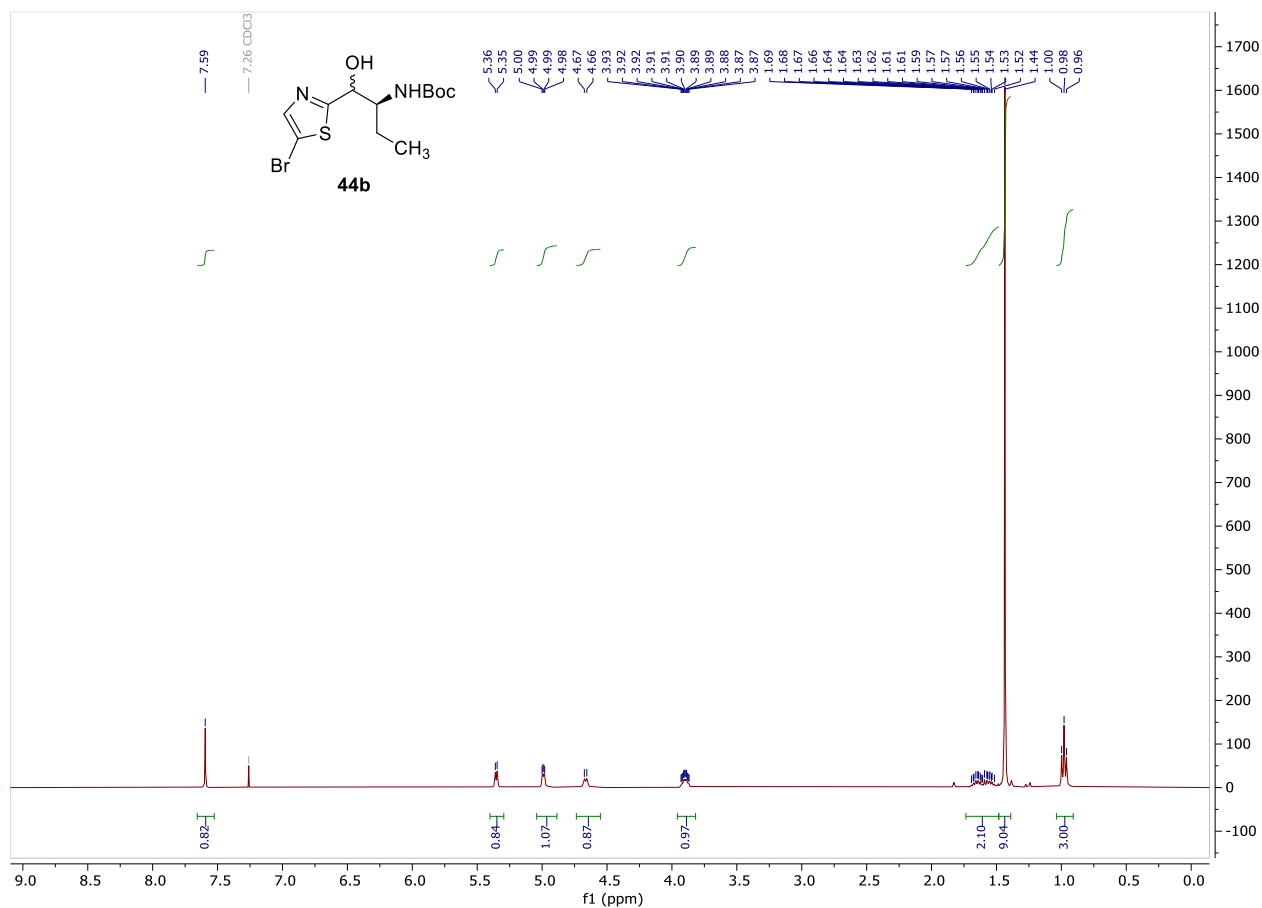

Compound **44b** – major diastereomer ( $^{13}\text{C}$  NMR, 101 MHz):

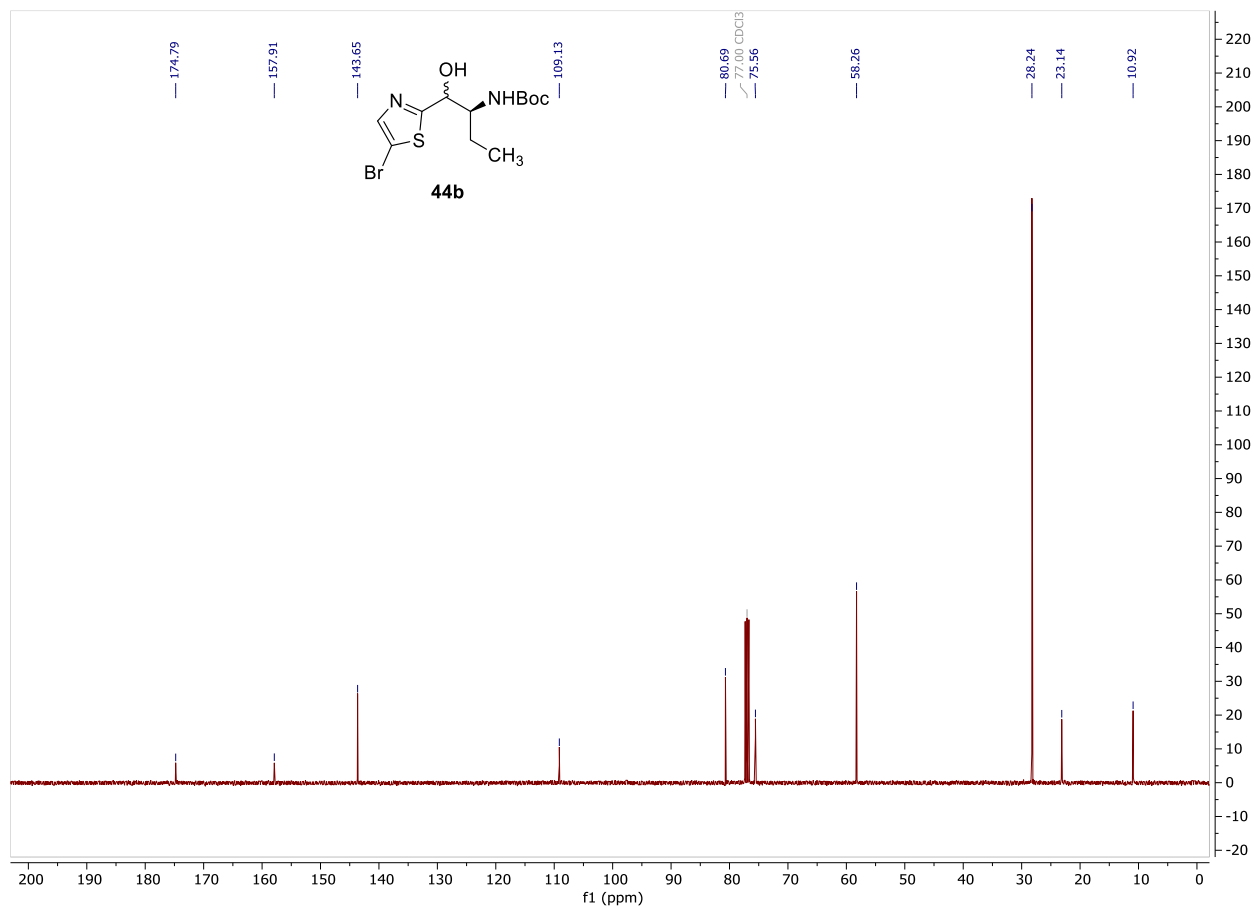

Compound **44b** – minor diastereomer ( $^1\text{H}$  NMR, 400 MHz):

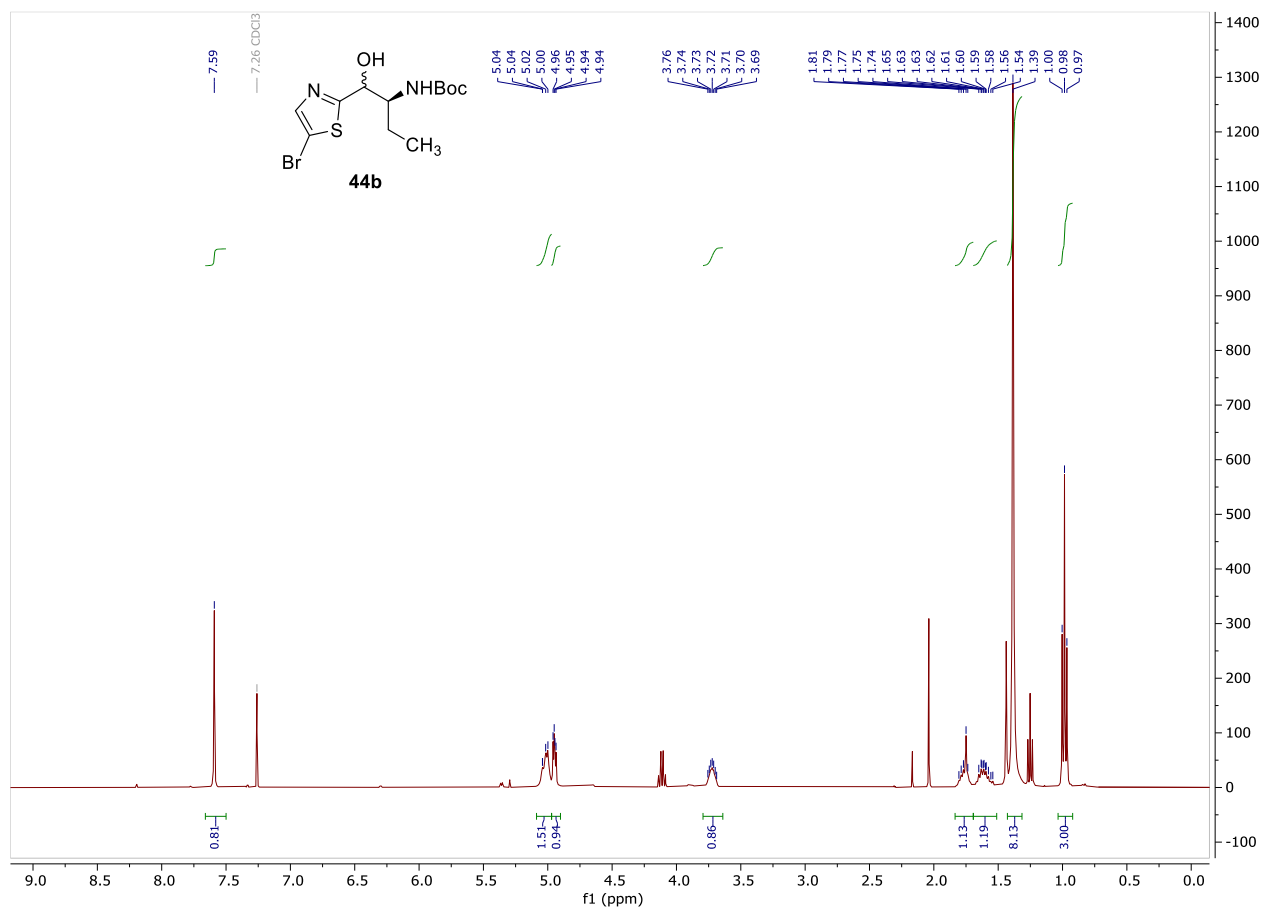

Compound **44b** – minor diastereomer ( $^{13}\text{C}$  NMR, 101 MHz):

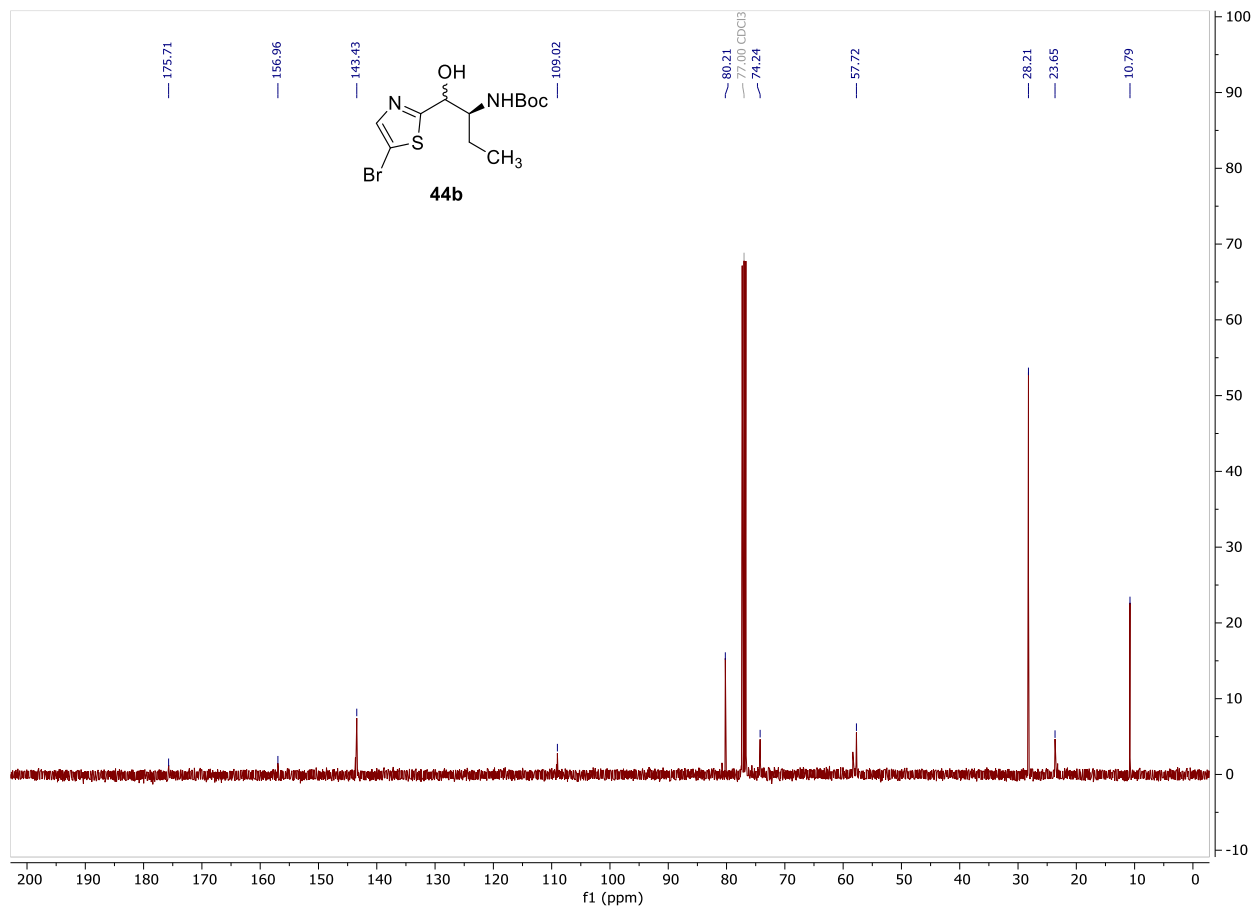

Compound **40a** ( $^1\text{H}$  NMR, 400 MHz):

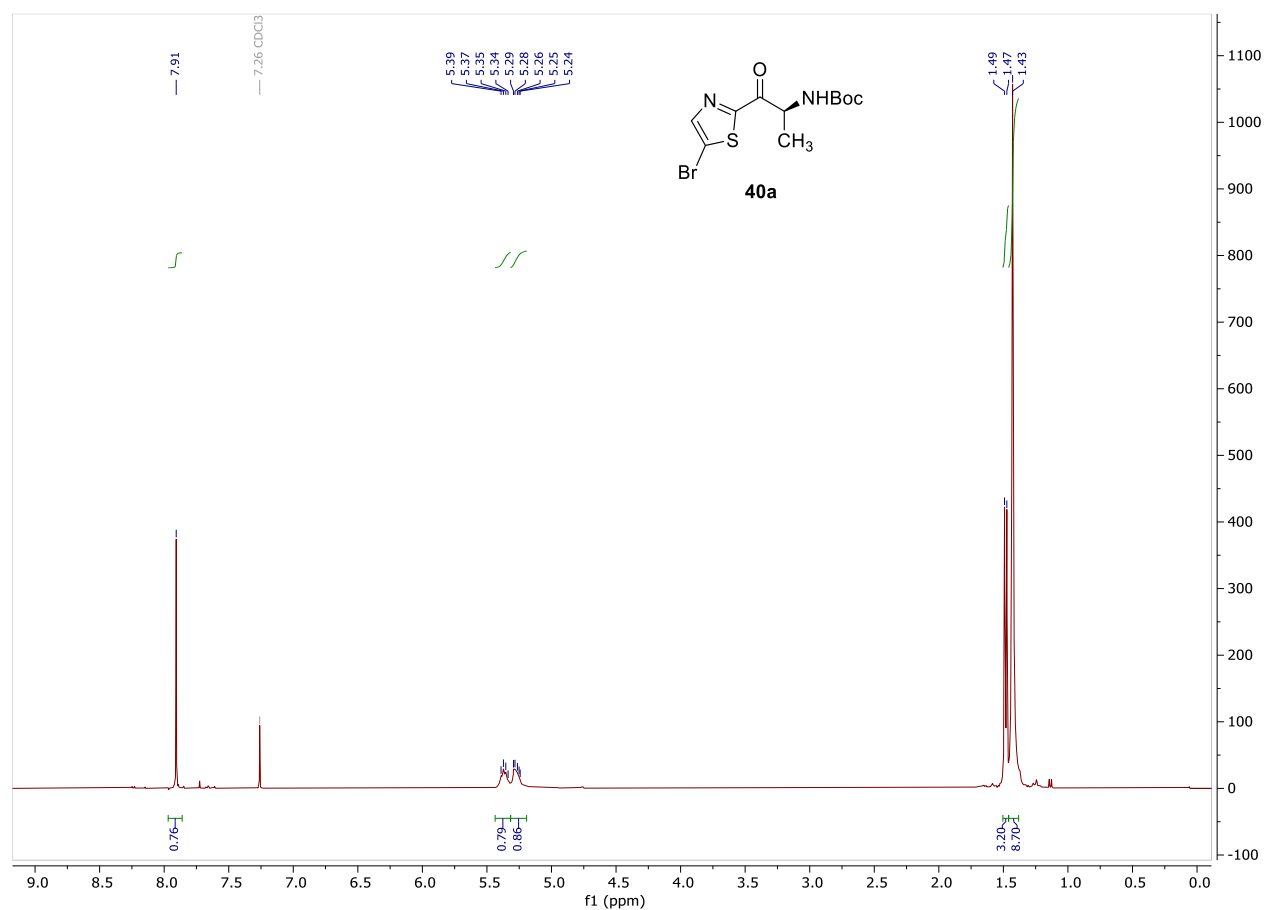

Compound **40a** ( $^{13}\text{C}$  NMR, 101 MHz):

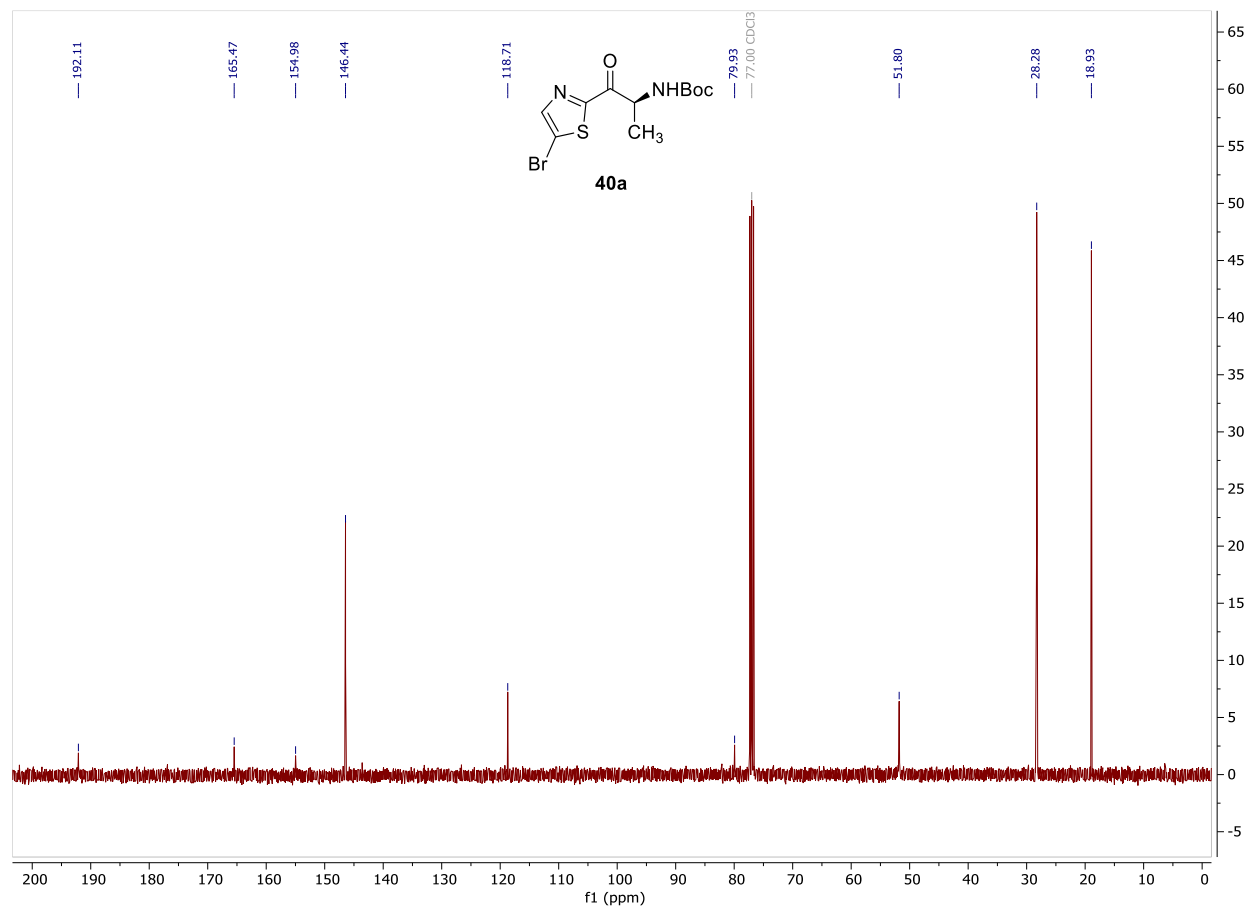

Compound **40b** ( $^1\text{H}$  NMR, 400 MHz):

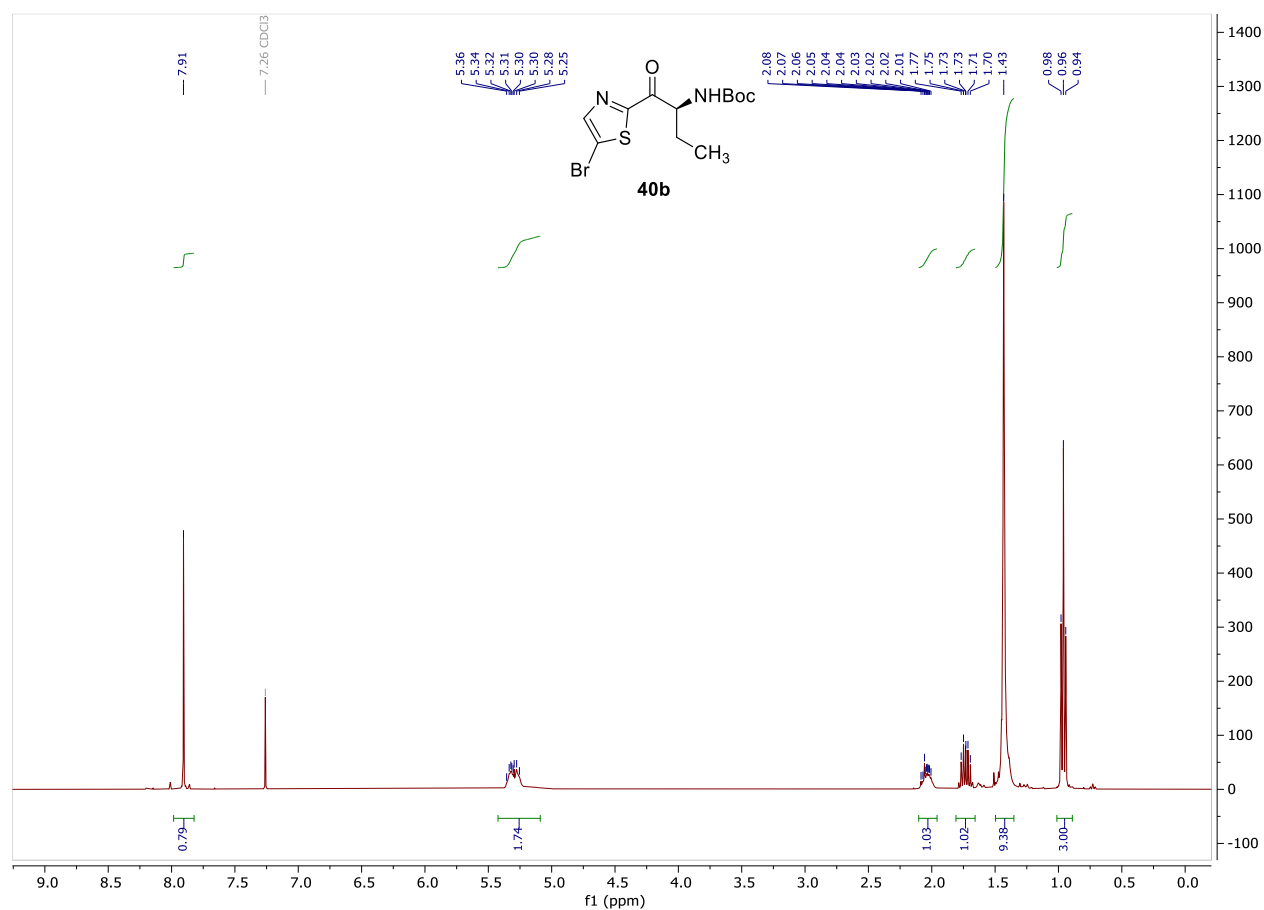

Compound **40b** ( $^{13}\text{C}$  NMR, 101 MHz):

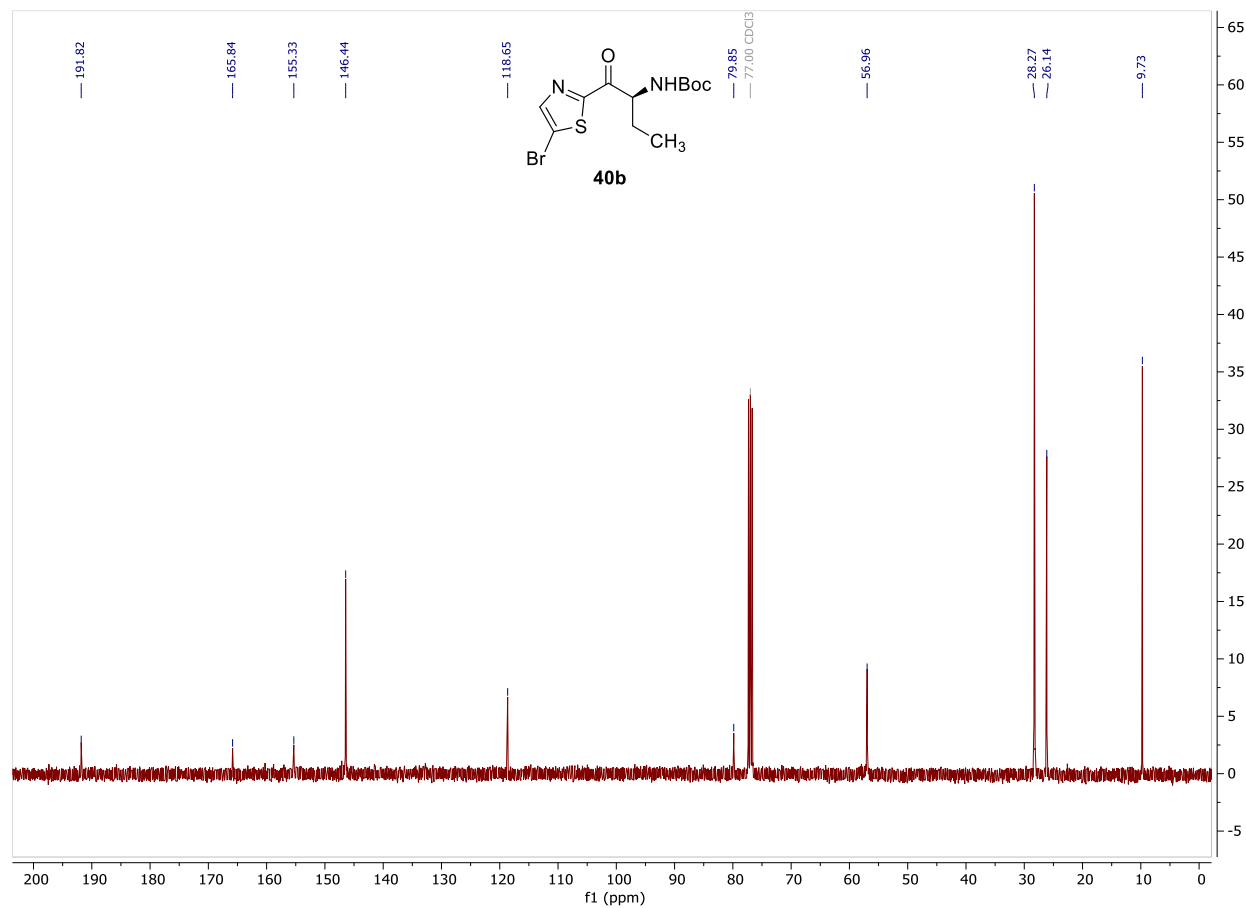

Compound **45a** ( $^1\text{H}$  NMR, 400 MHz):

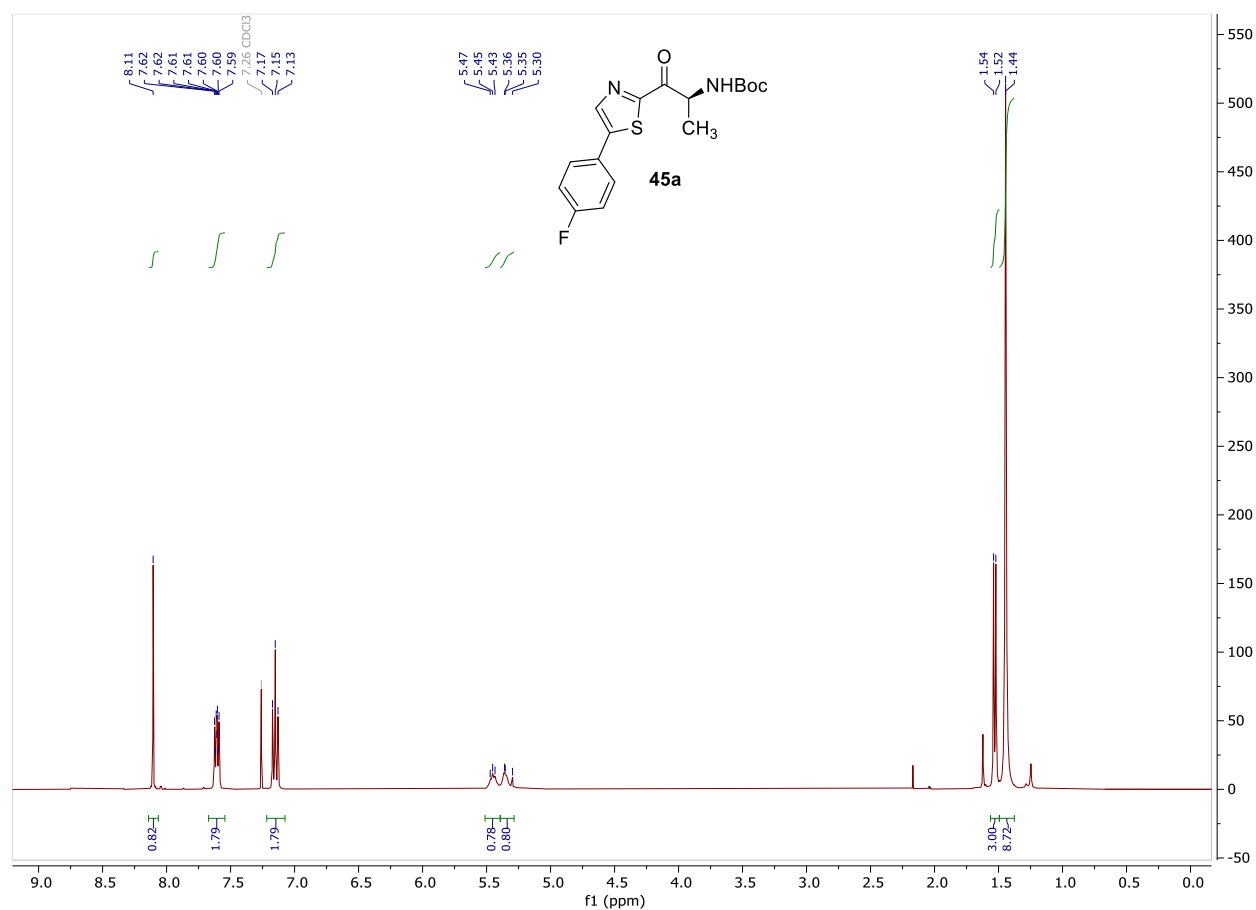

Compound **45a** ( $^{13}\text{C}$  NMR, 101 MHz):

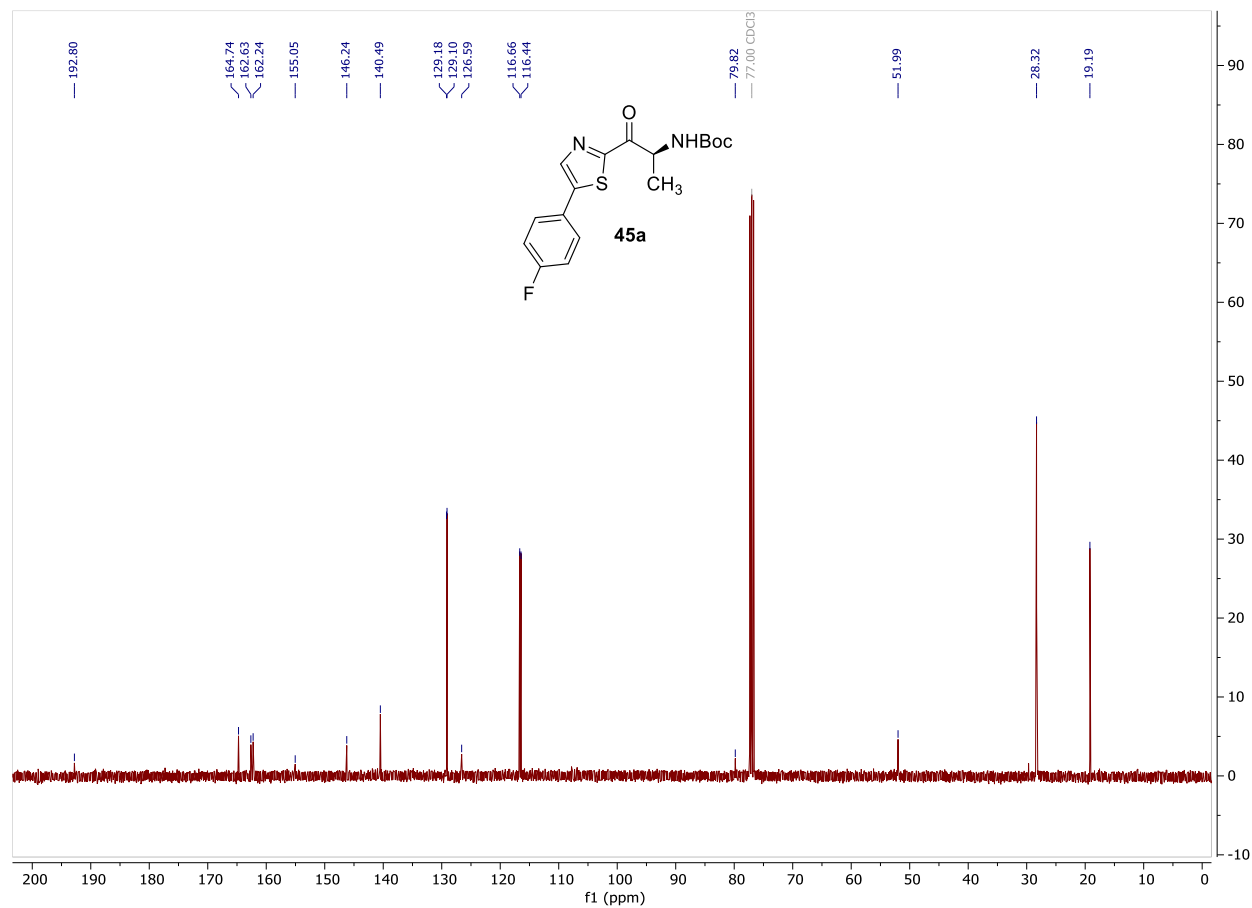



Compound **45a** ( $^{19}\text{F}$  NMR, 282 MHz):

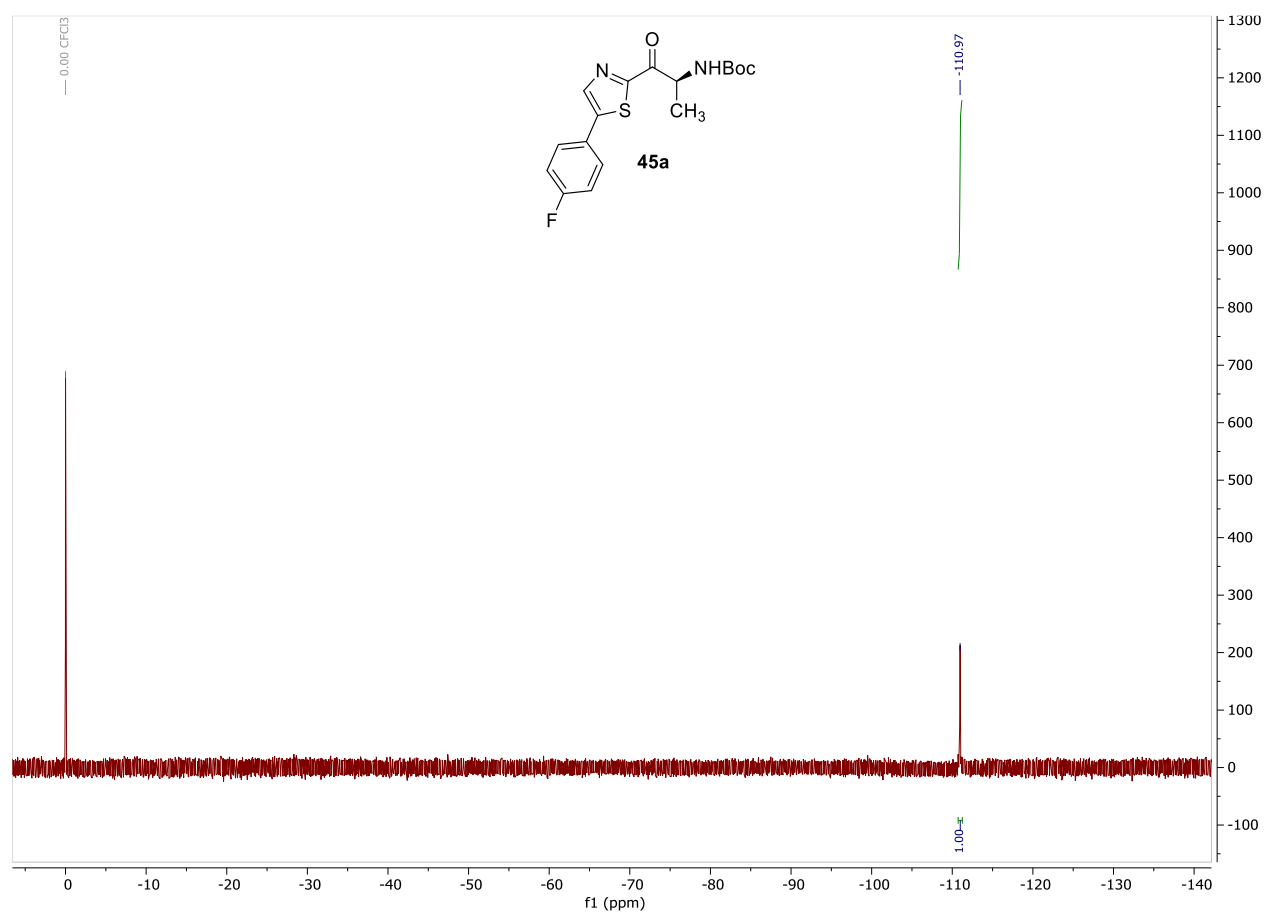

Compound **45b** ( $^1\text{H}$  NMR, 400 MHz):

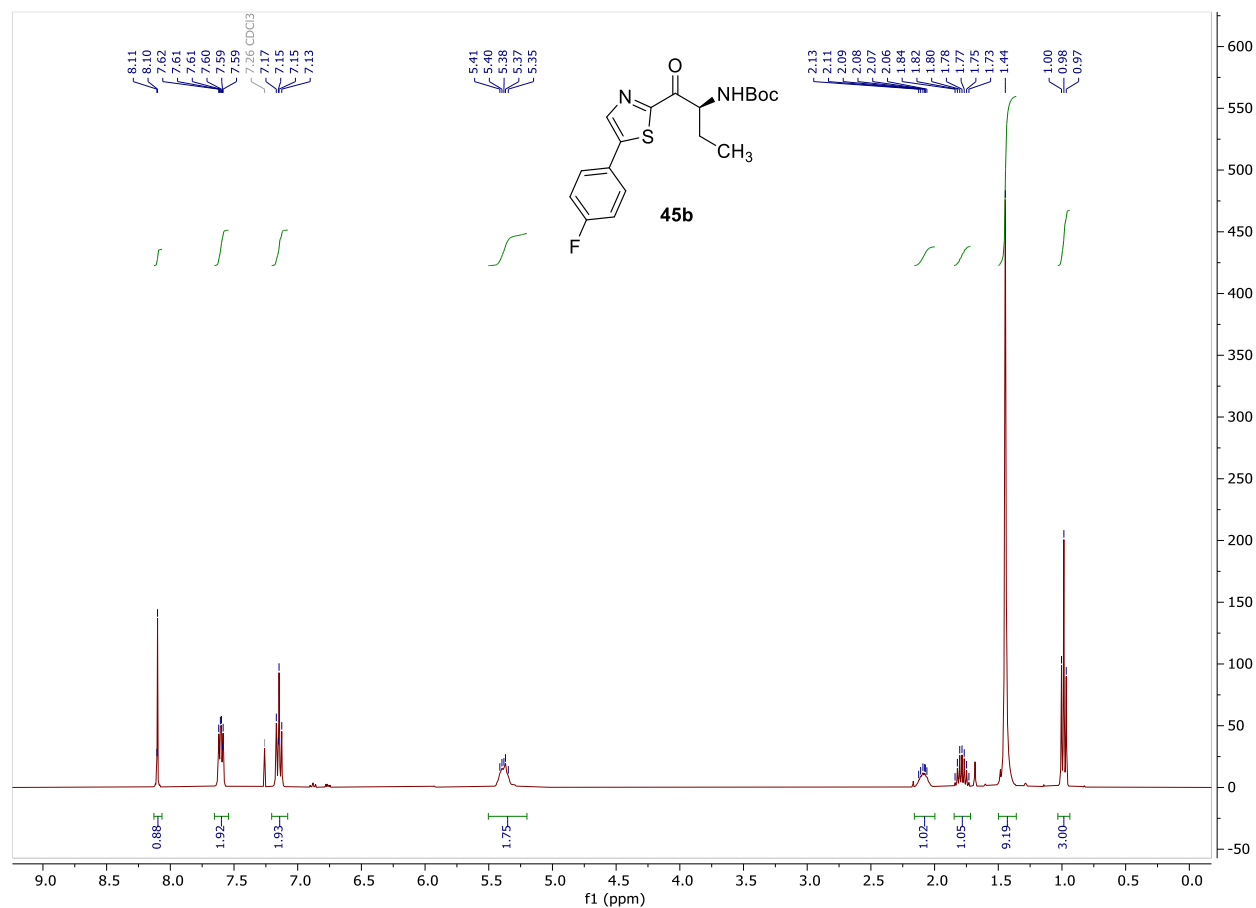

Compound **45b** ( $^{13}\text{C}$  NMR, 101 MHz):

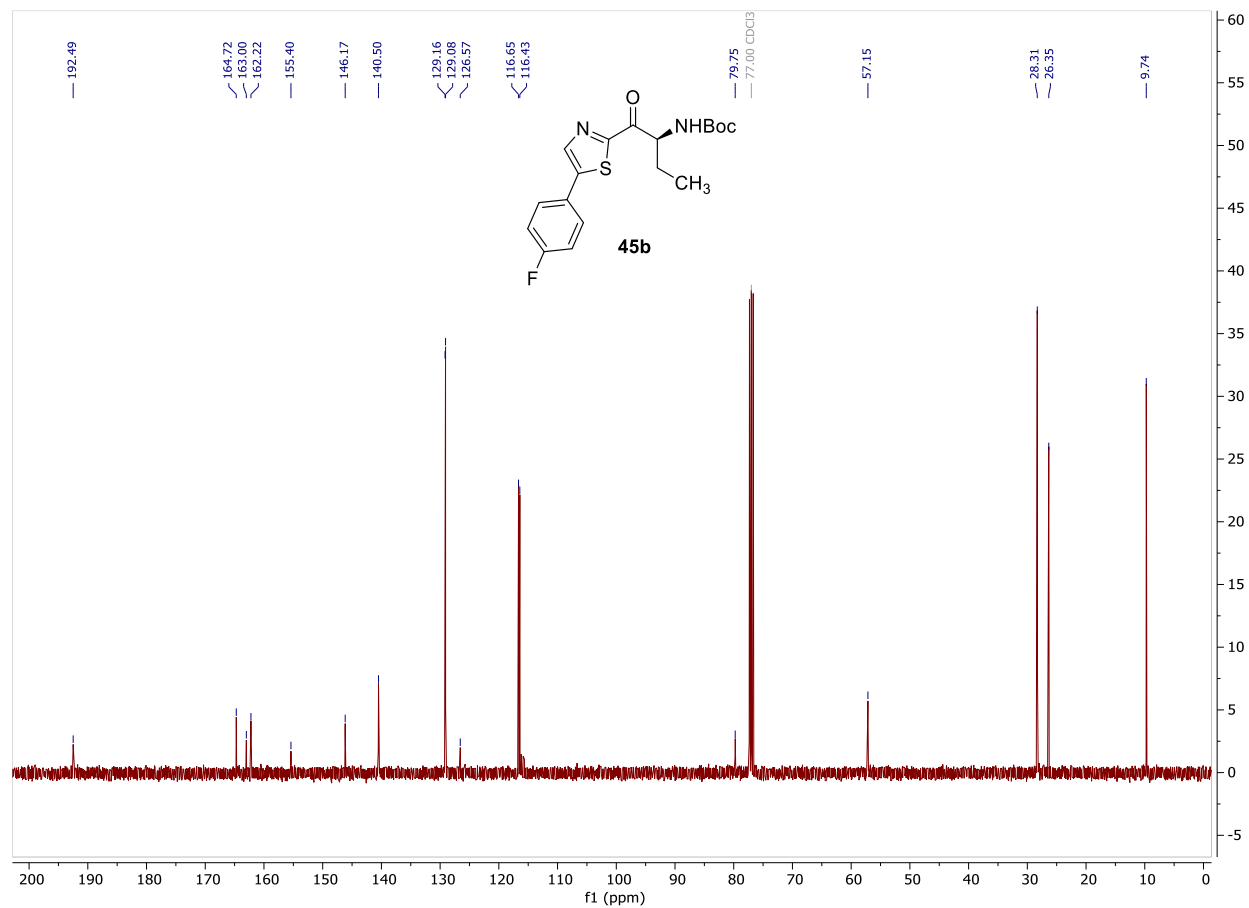

Compound **45b** ( $^{19}\text{F}$  NMR, 282 MHz):

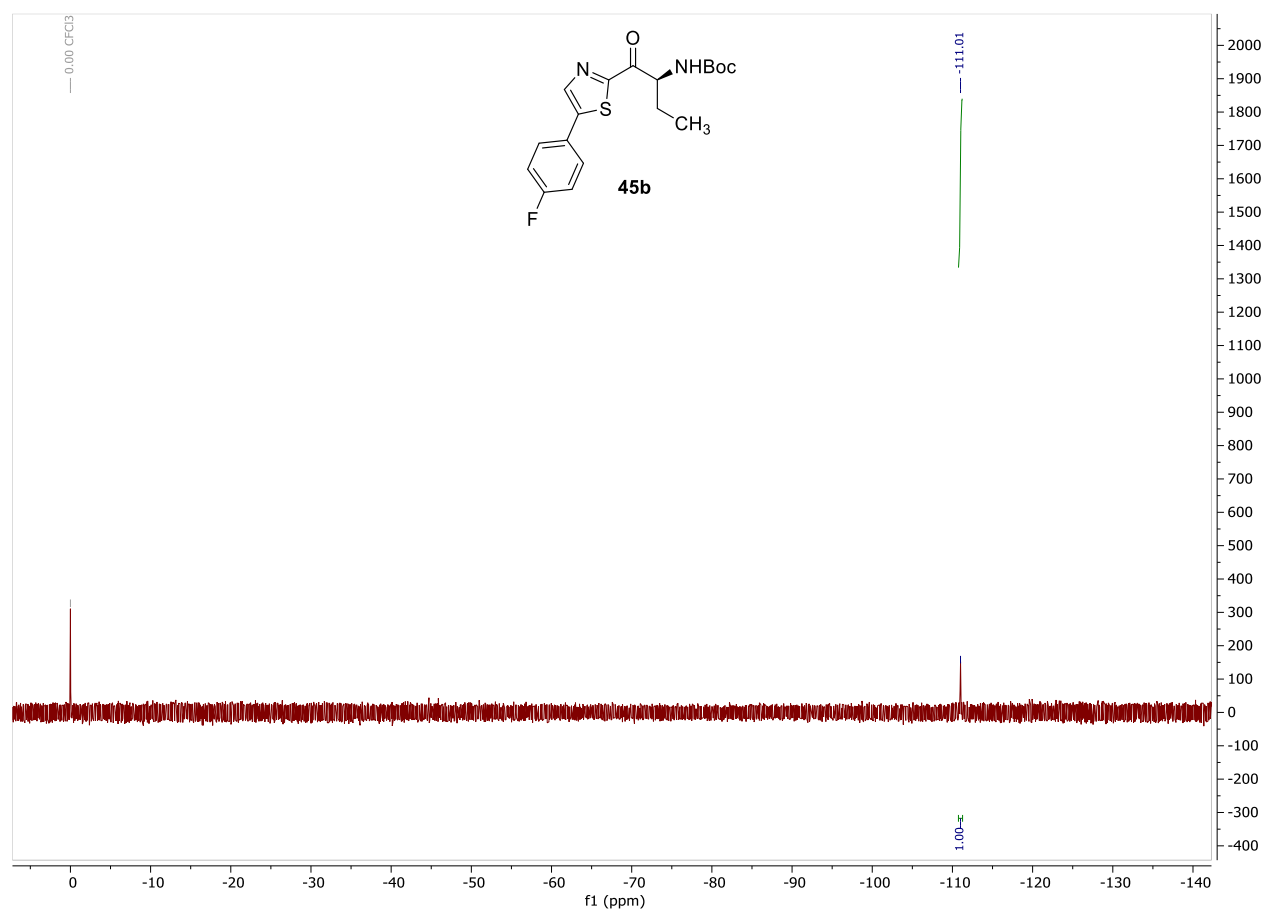

Compound **46a** ( $^1\text{H}$  NMR, 400 MHz):

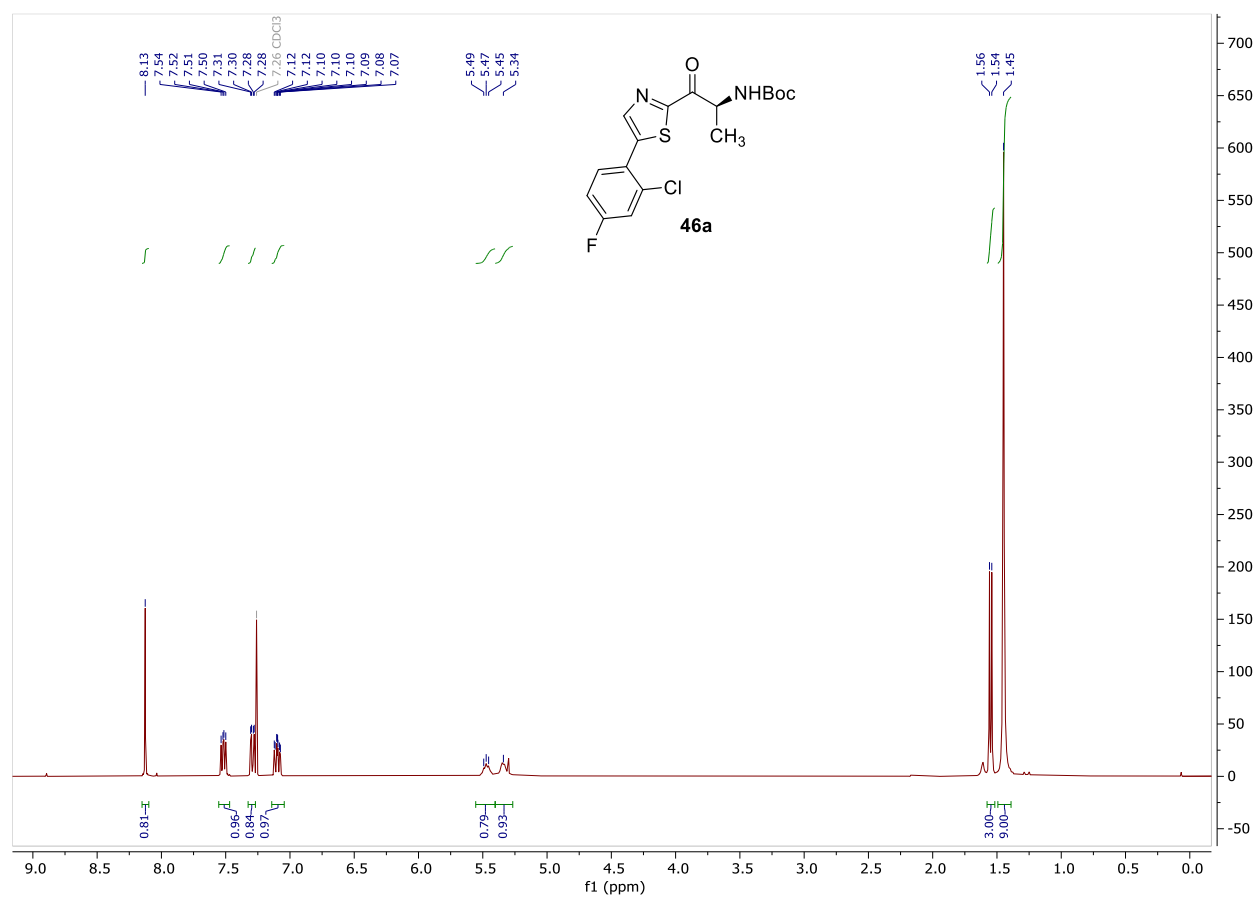

Compound **46a** ( $^{13}\text{C}$  NMR, 101 MHz):

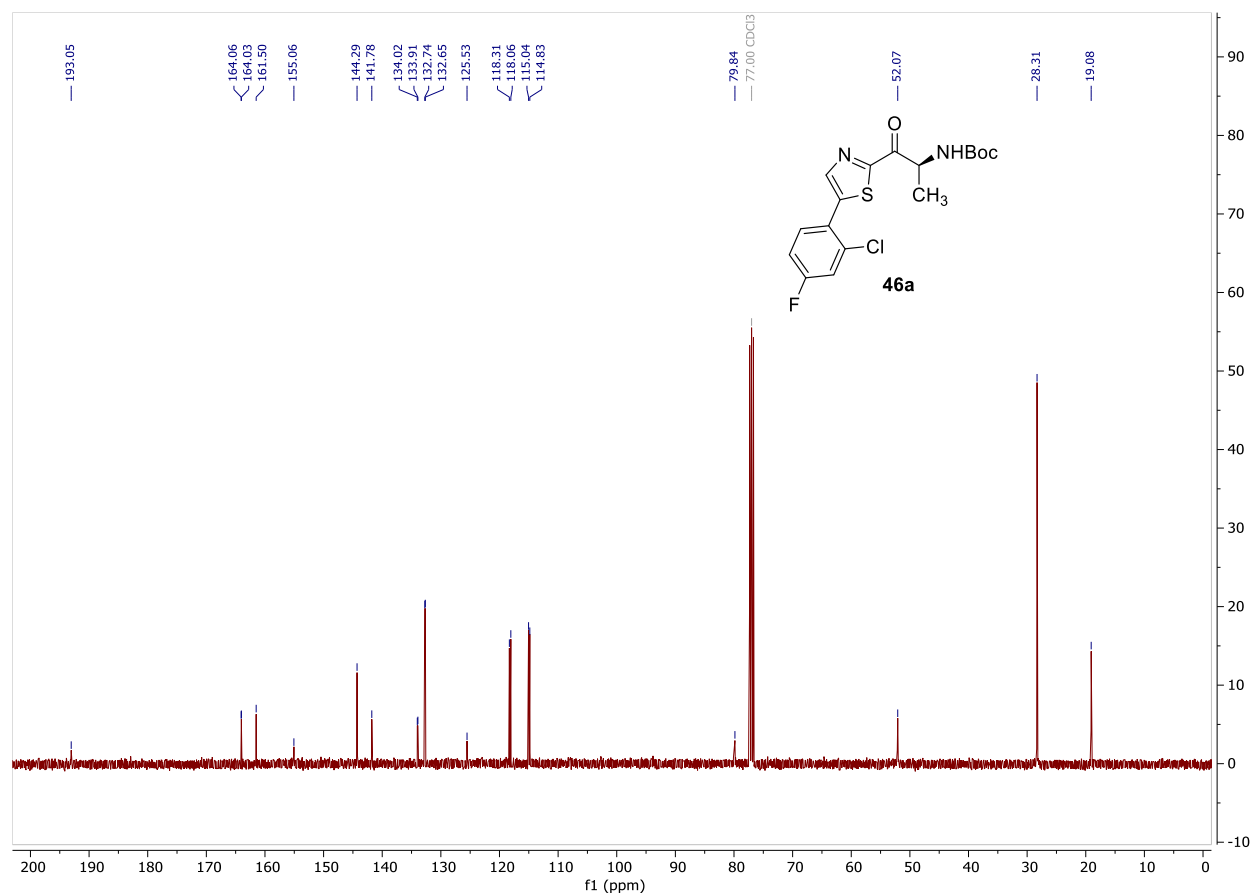

Compound **46a** ( $^{19}\text{F}$  NMR, 282 MHz):

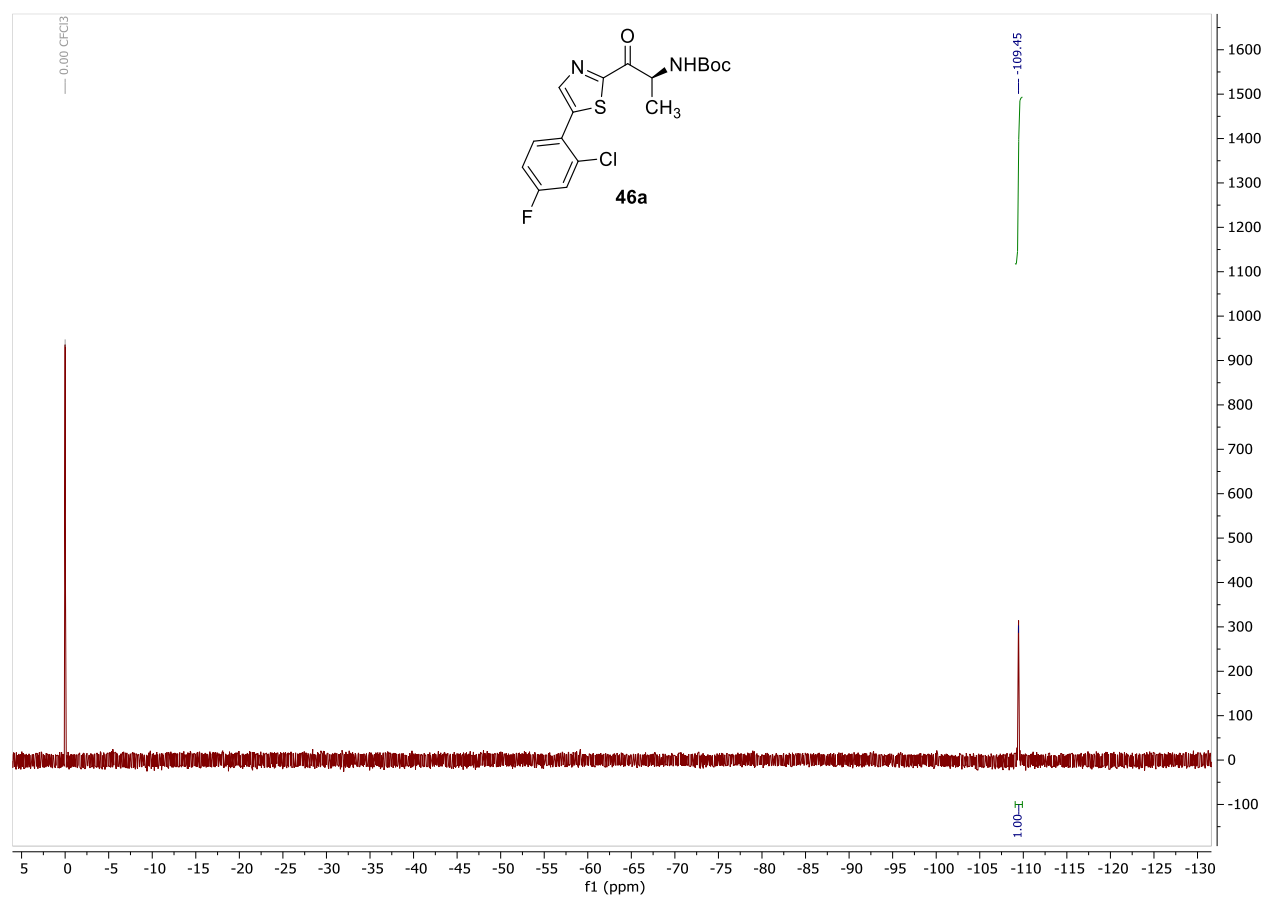

Compound **46b** ( $^1\text{H}$  NMR, 400 MHz):

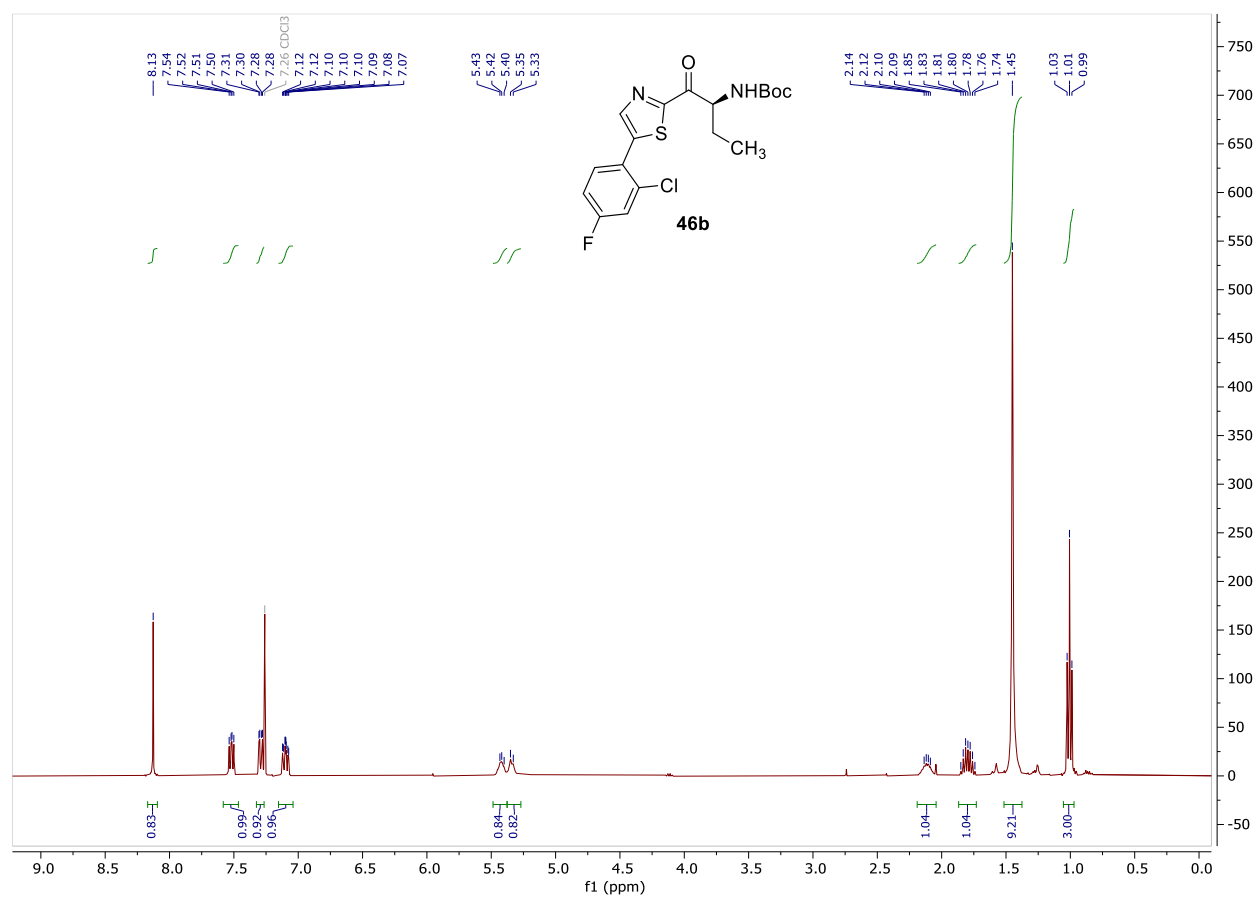

Compound **46b** ( $^{13}\text{C}$  NMR, 101 MHz):

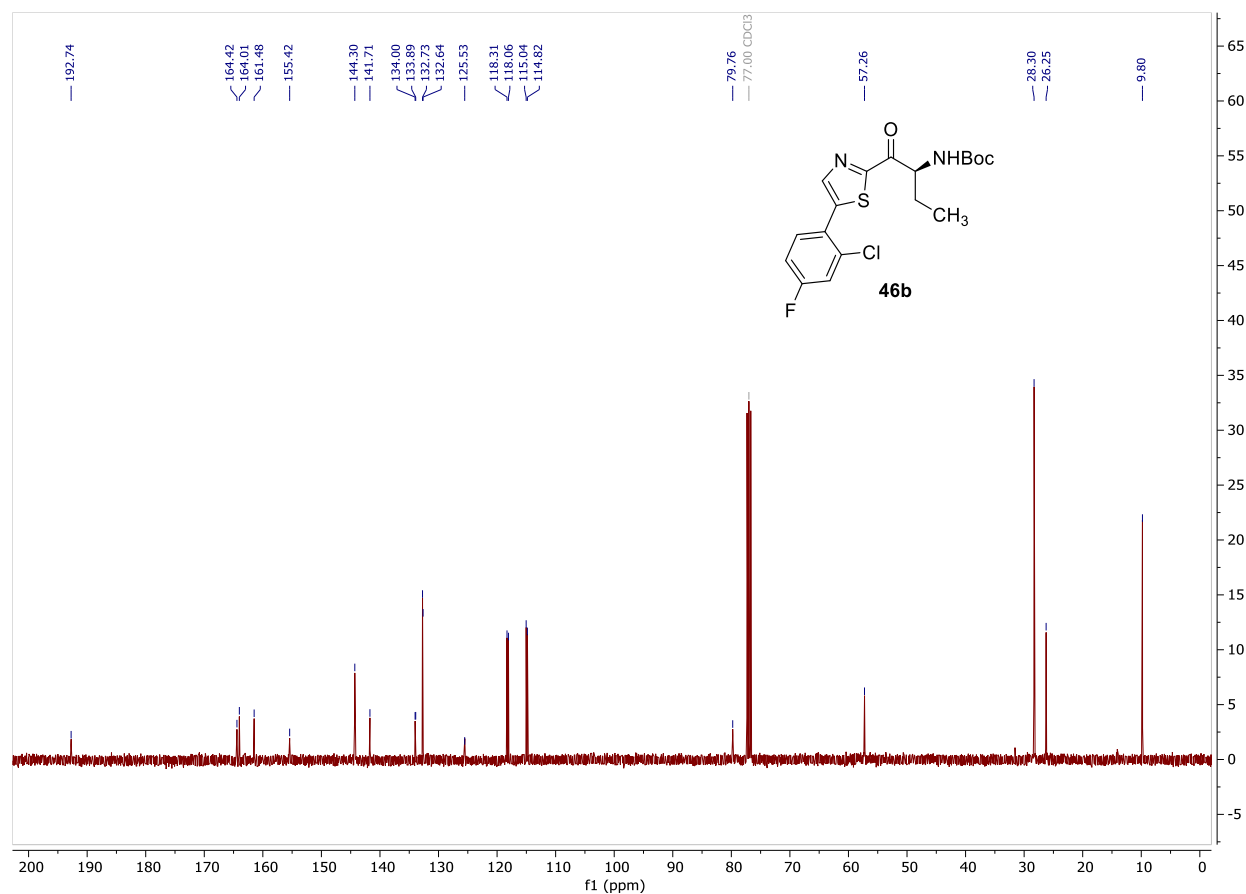

Compound **46b** ( $^{19}\text{F}$  NMR, 282 MHz):

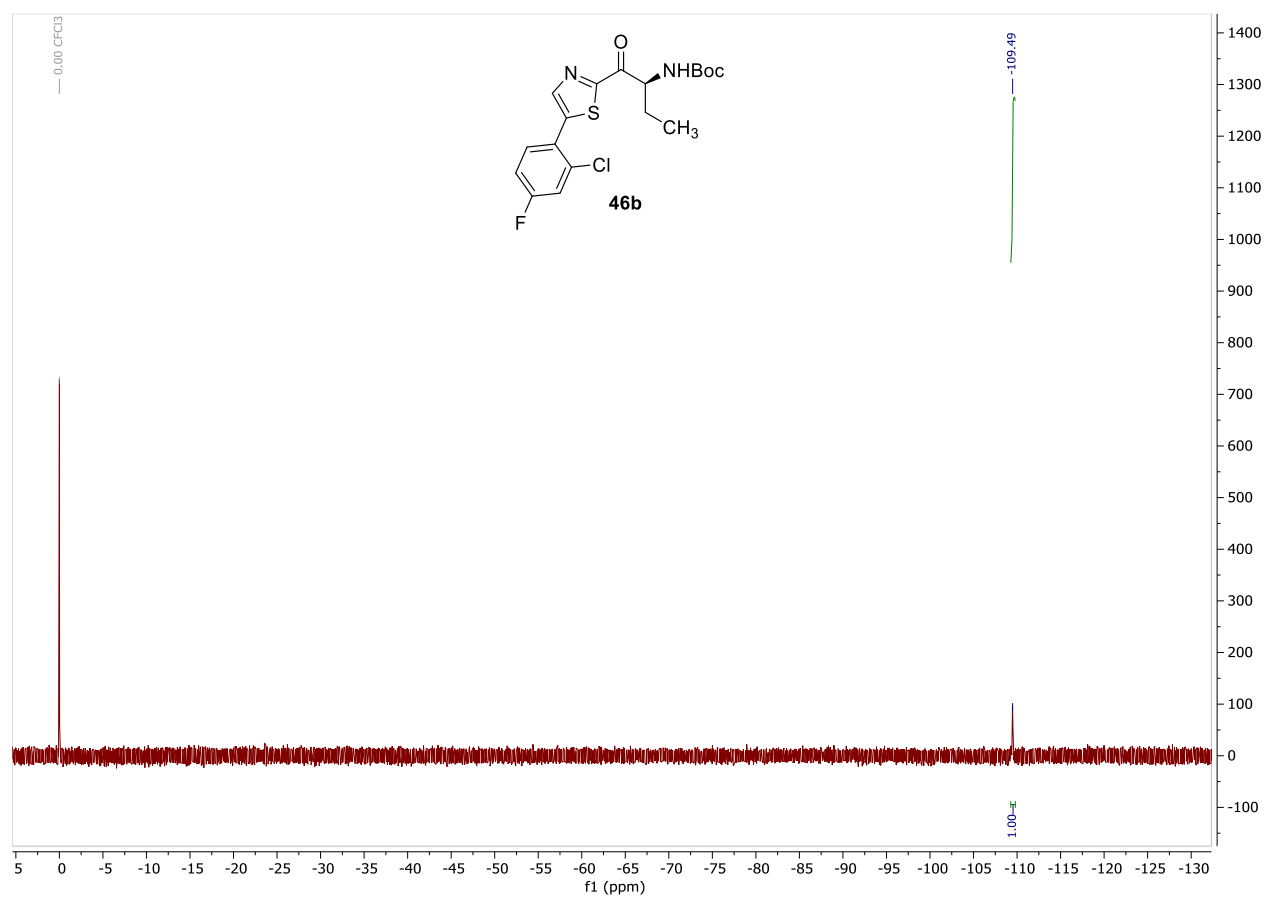

Compound **47** ( $^1\text{H}$  NMR, 400 MHz):

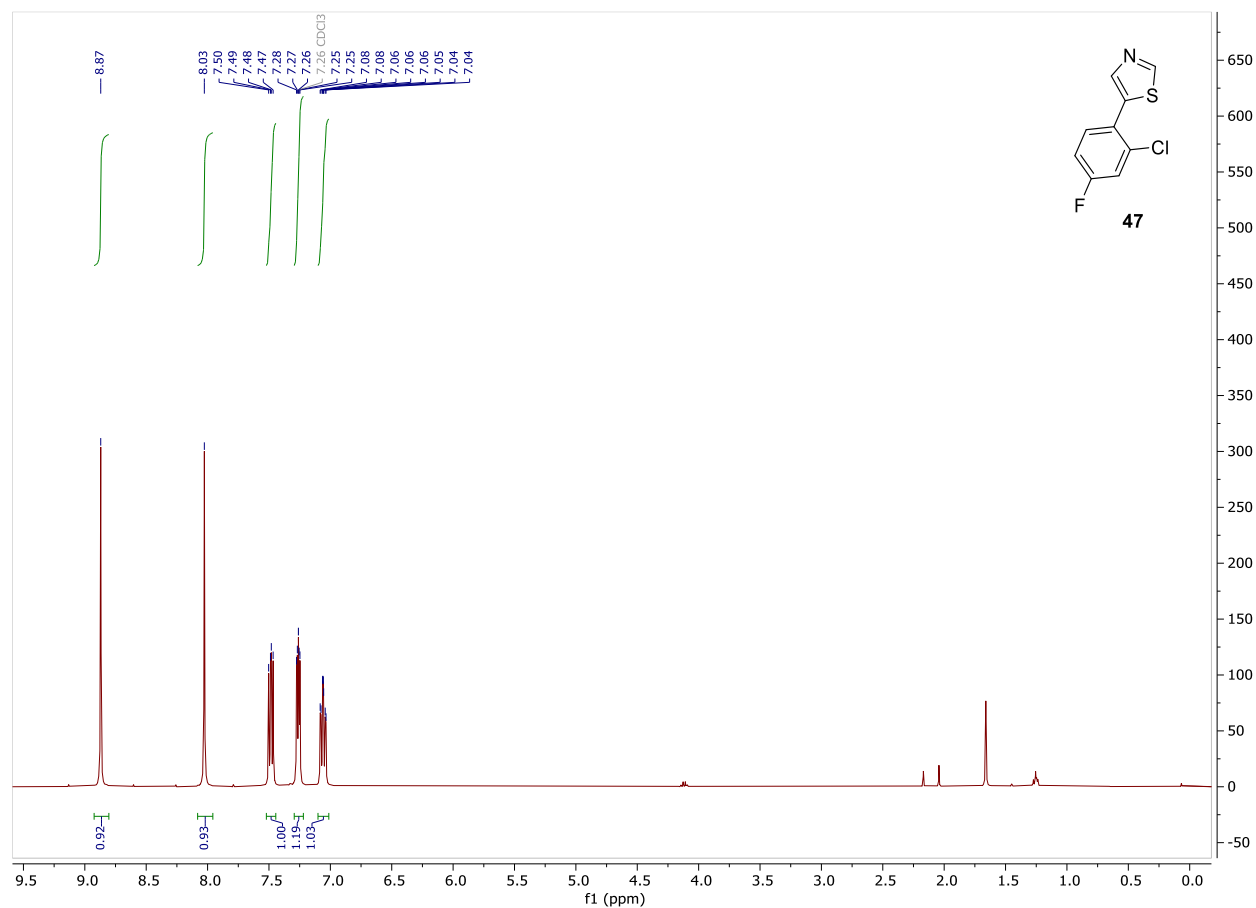

Compound **47** ( $^{13}\text{C}$  NMR, 101 MHz):

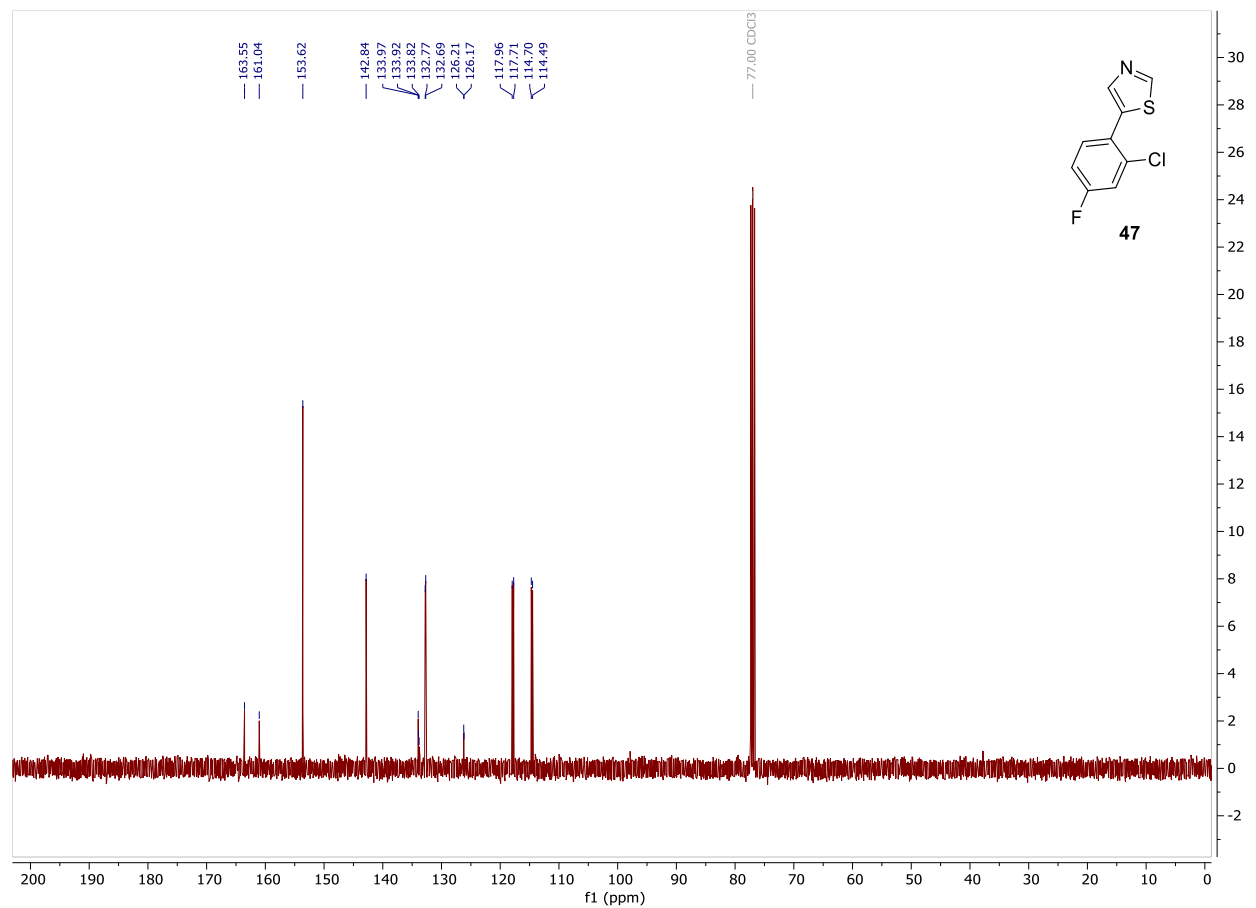



Compound **47** ( $^{19}\text{F}$  NMR, 282 MHz):

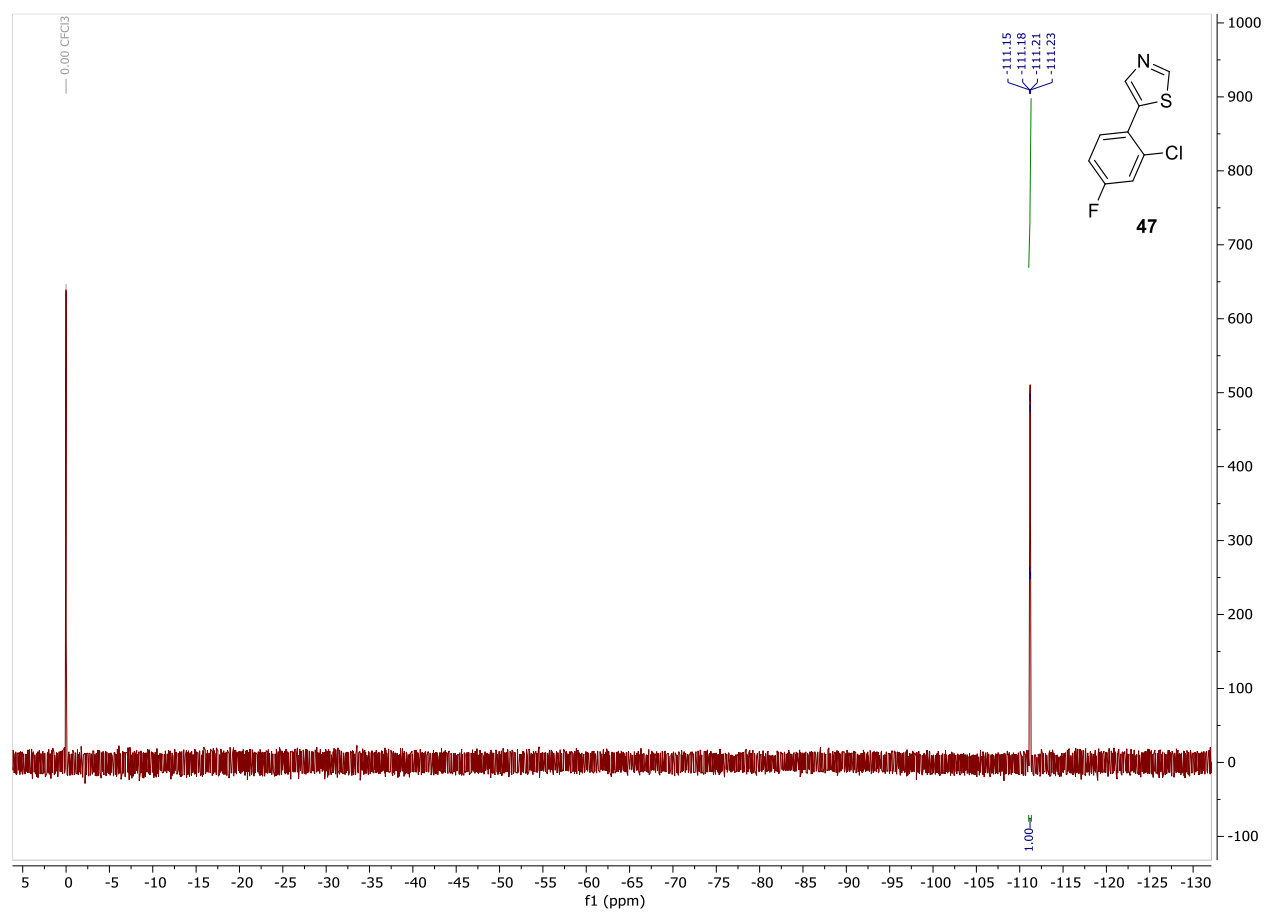

Compound **17** ( $^1\text{H}$  NMR, 400 MHz):

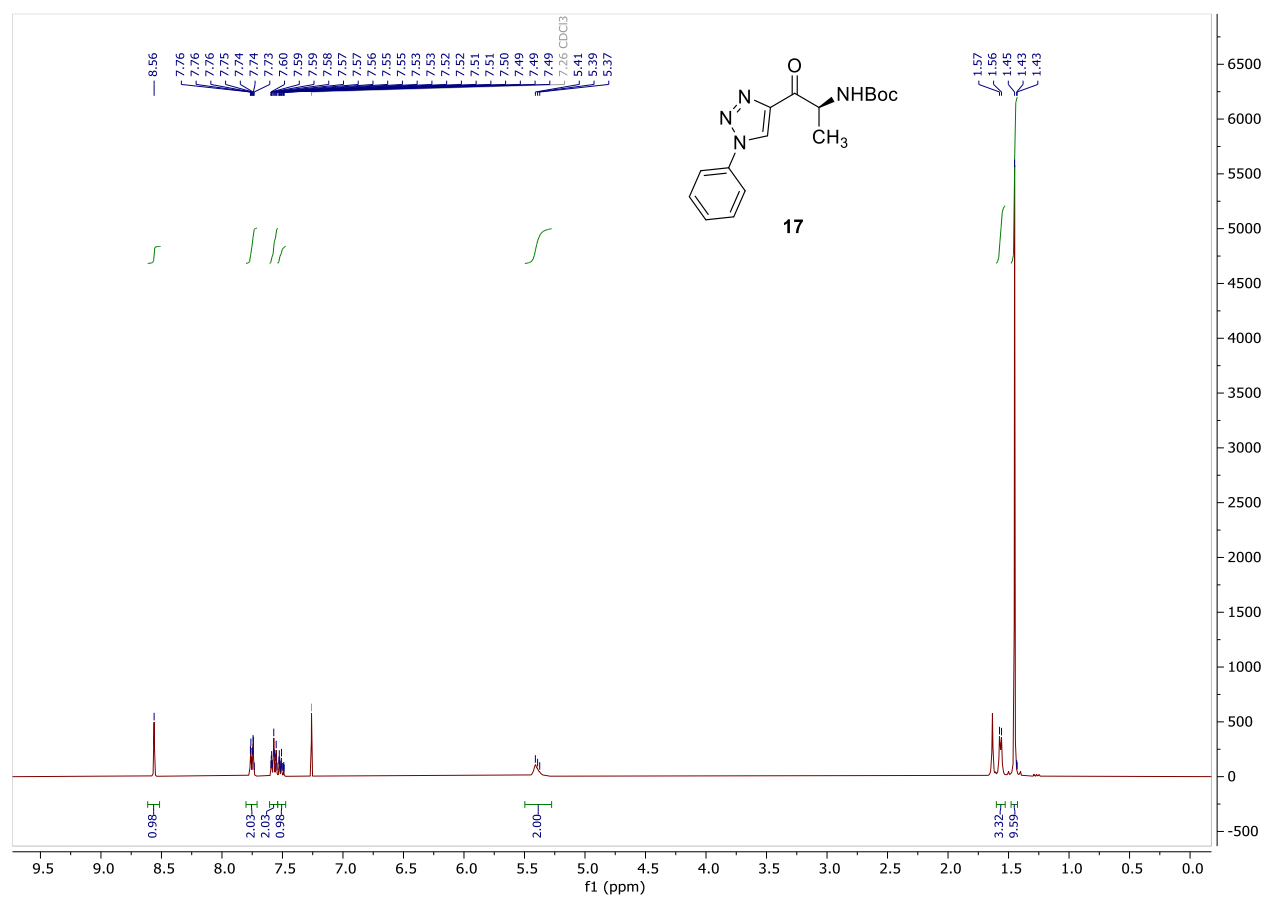

Compound **17** ( $^{13}\text{C}$  NMR, 101 MHz):

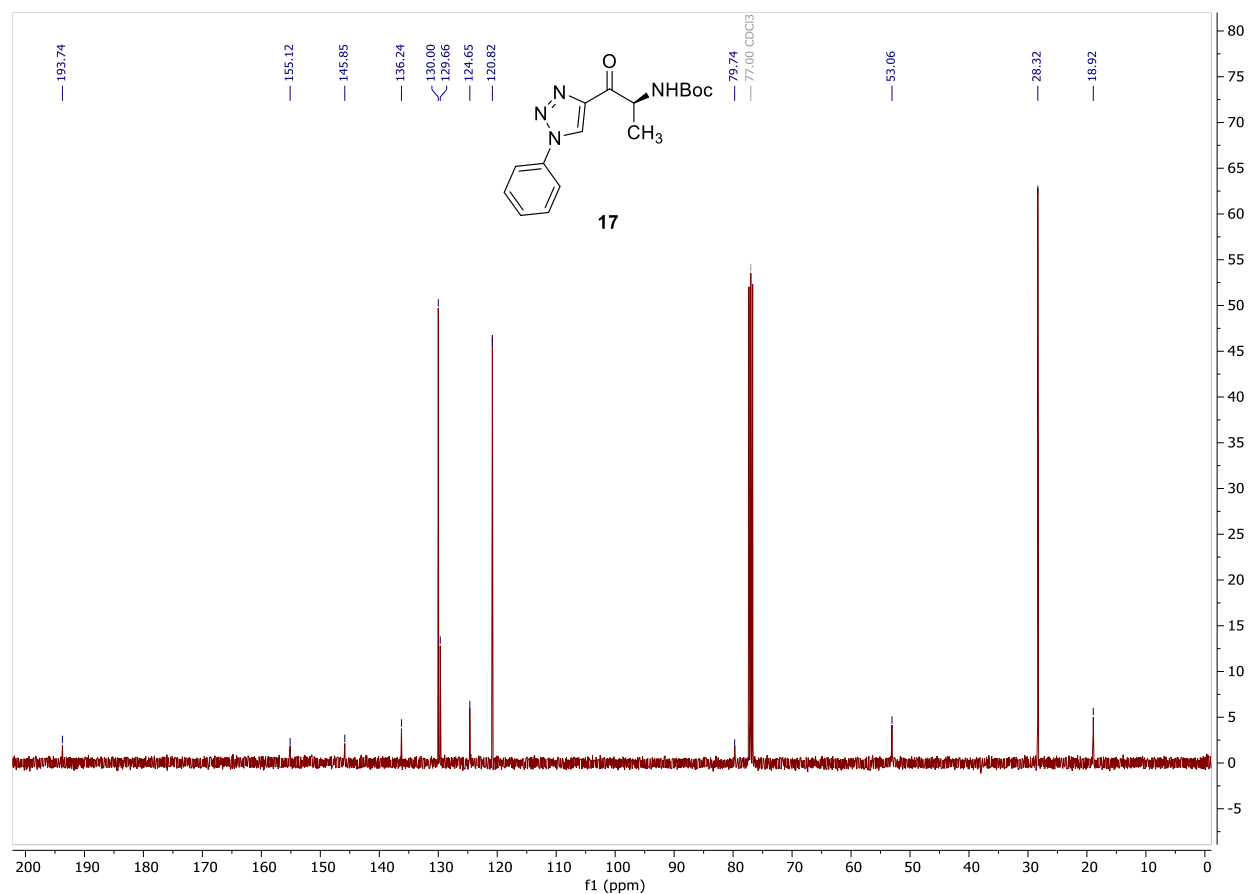

Compound **20a** ( $^1\text{H}$  NMR, 400 MHz):

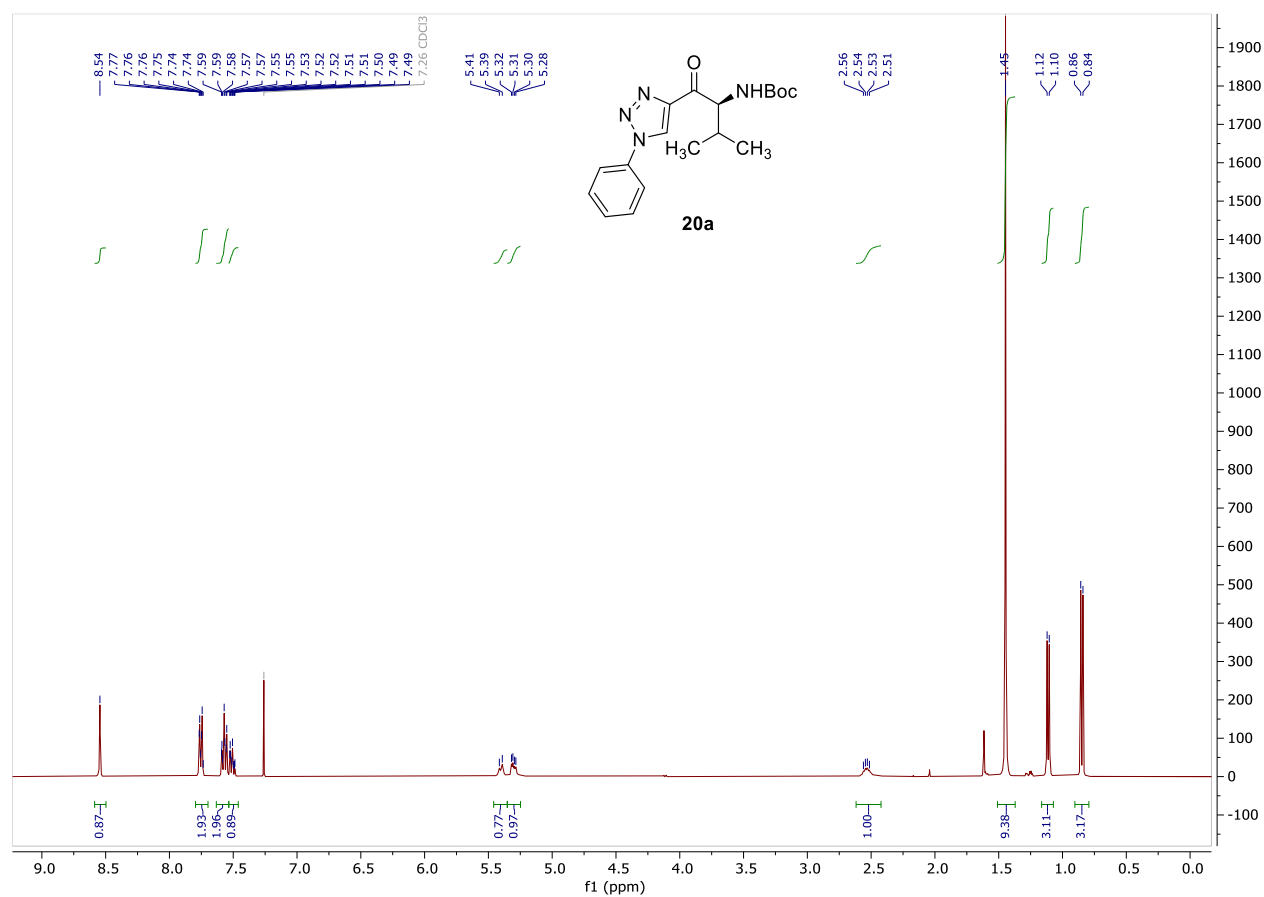

Compound **20a** ( $^{13}\text{C}$  NMR, 101 MHz):

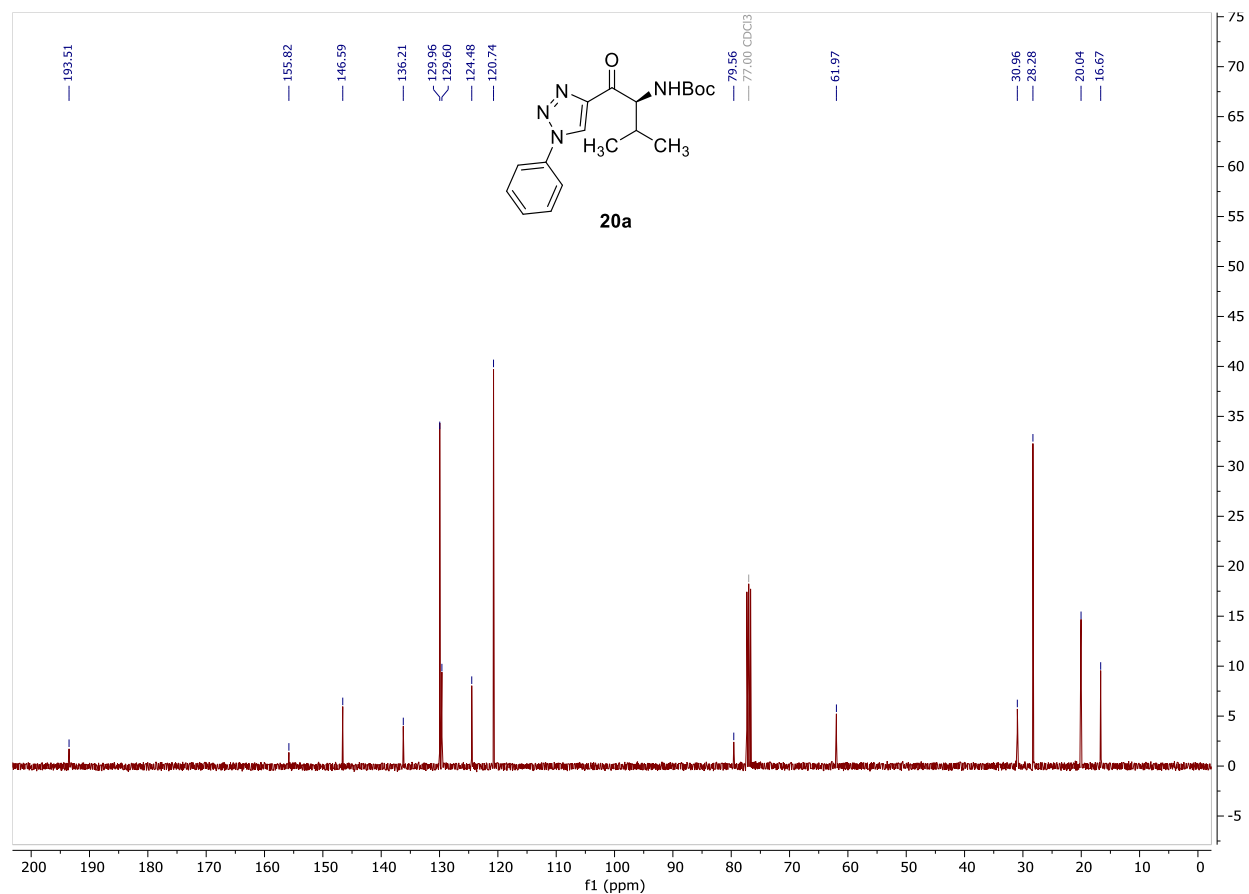

Compound **20b** ( $^1\text{H}$  NMR, 400 MHz):

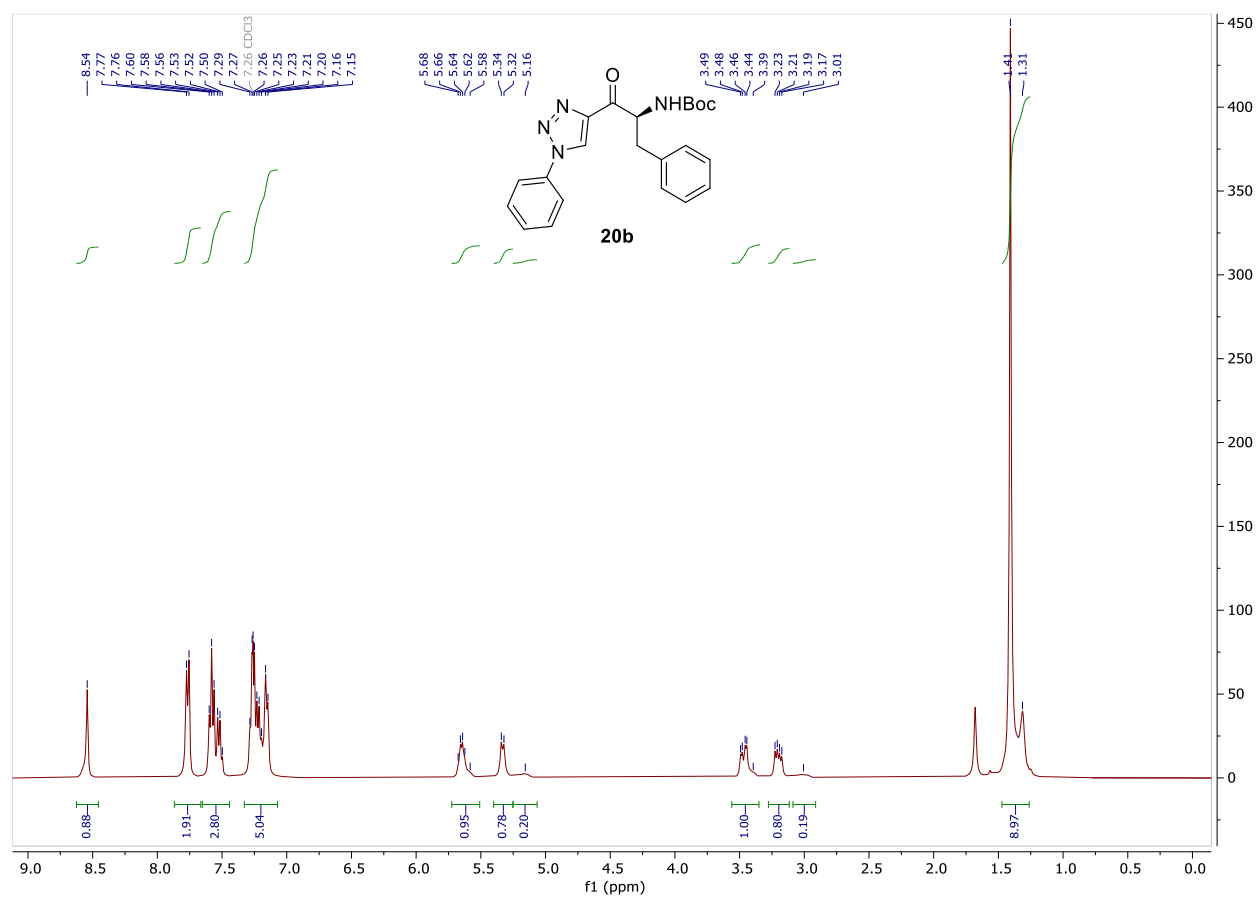

Compound **20b** ( $^{13}\text{C}$  NMR, 101 MHz):

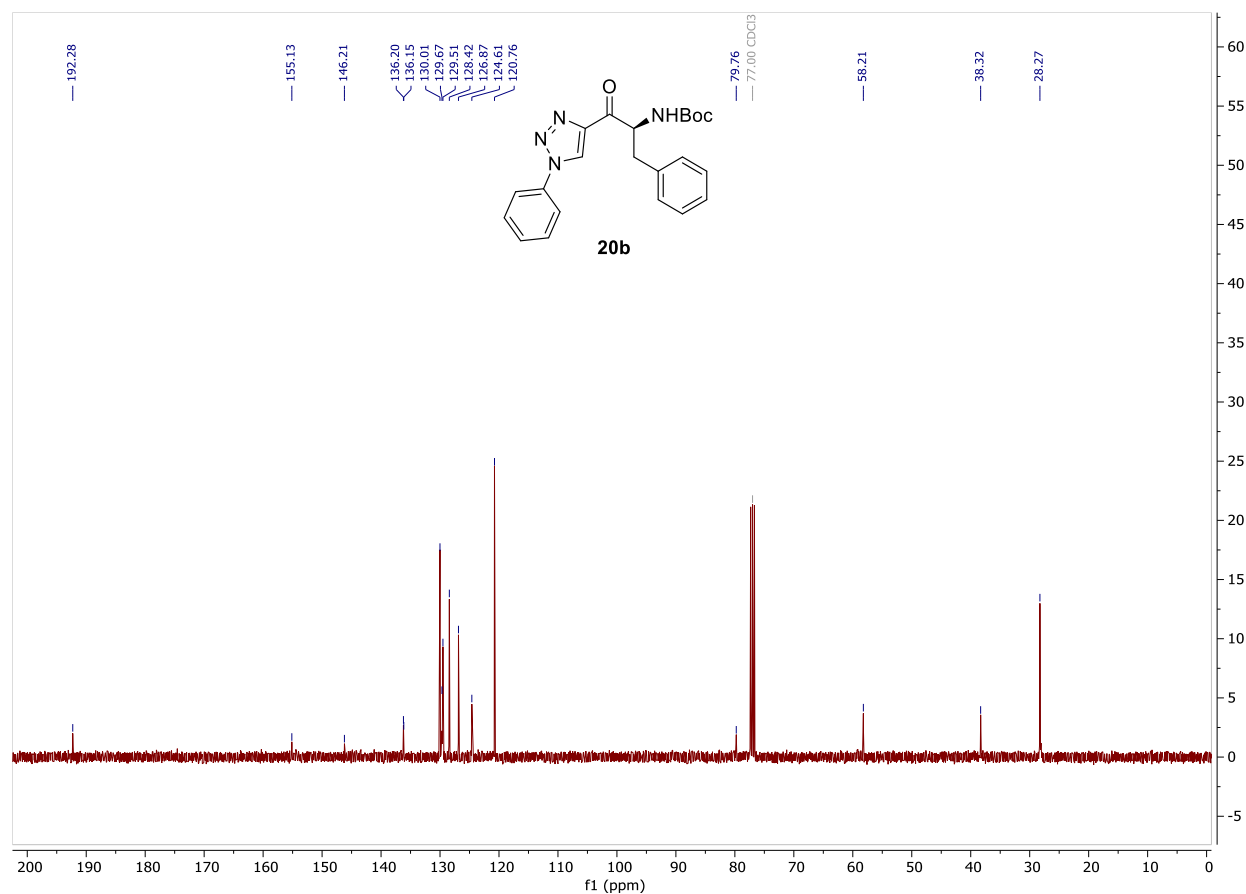

Compound **20c** ( $^1\text{H}$  NMR, 400 MHz):

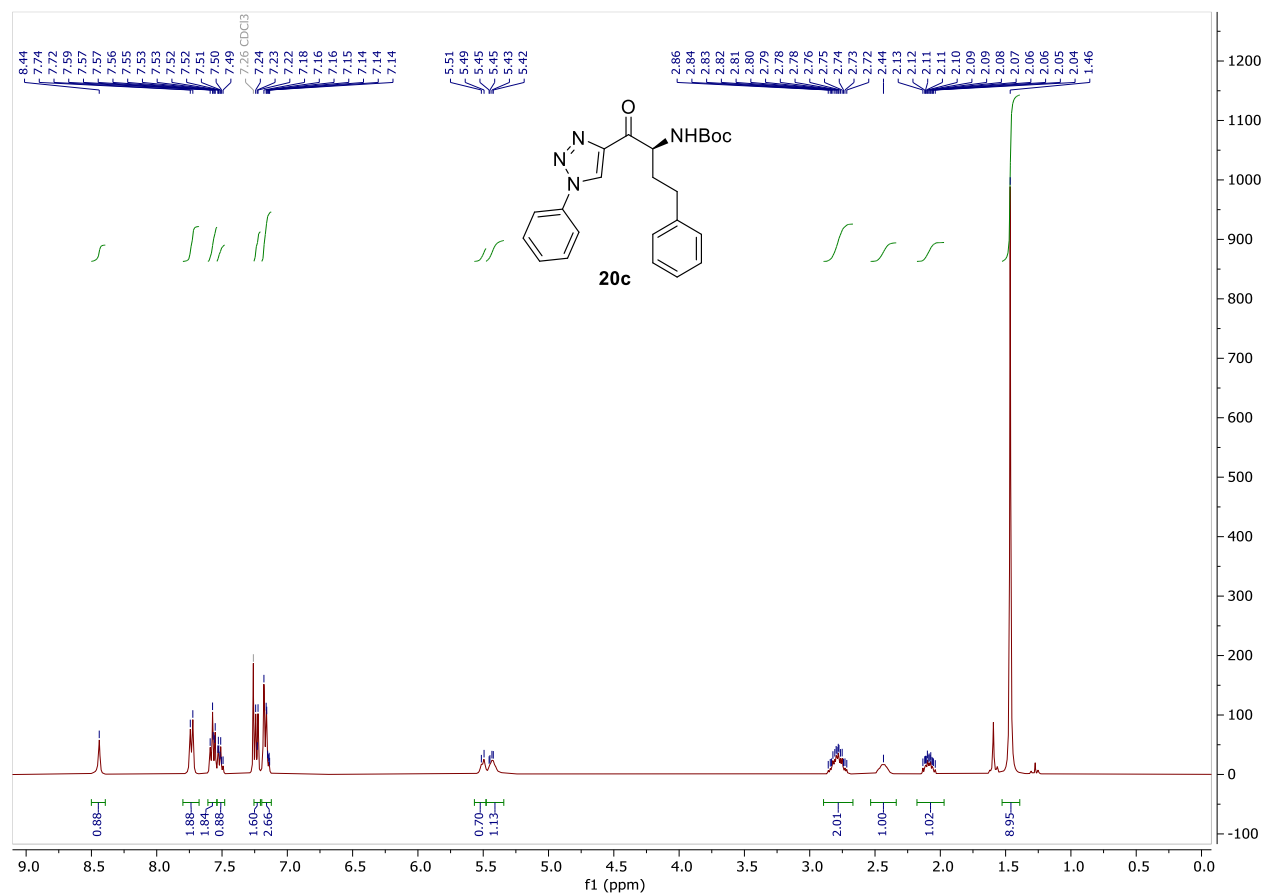

Compound **20c** ( $^{13}\text{C}$  NMR, 101 MHz):

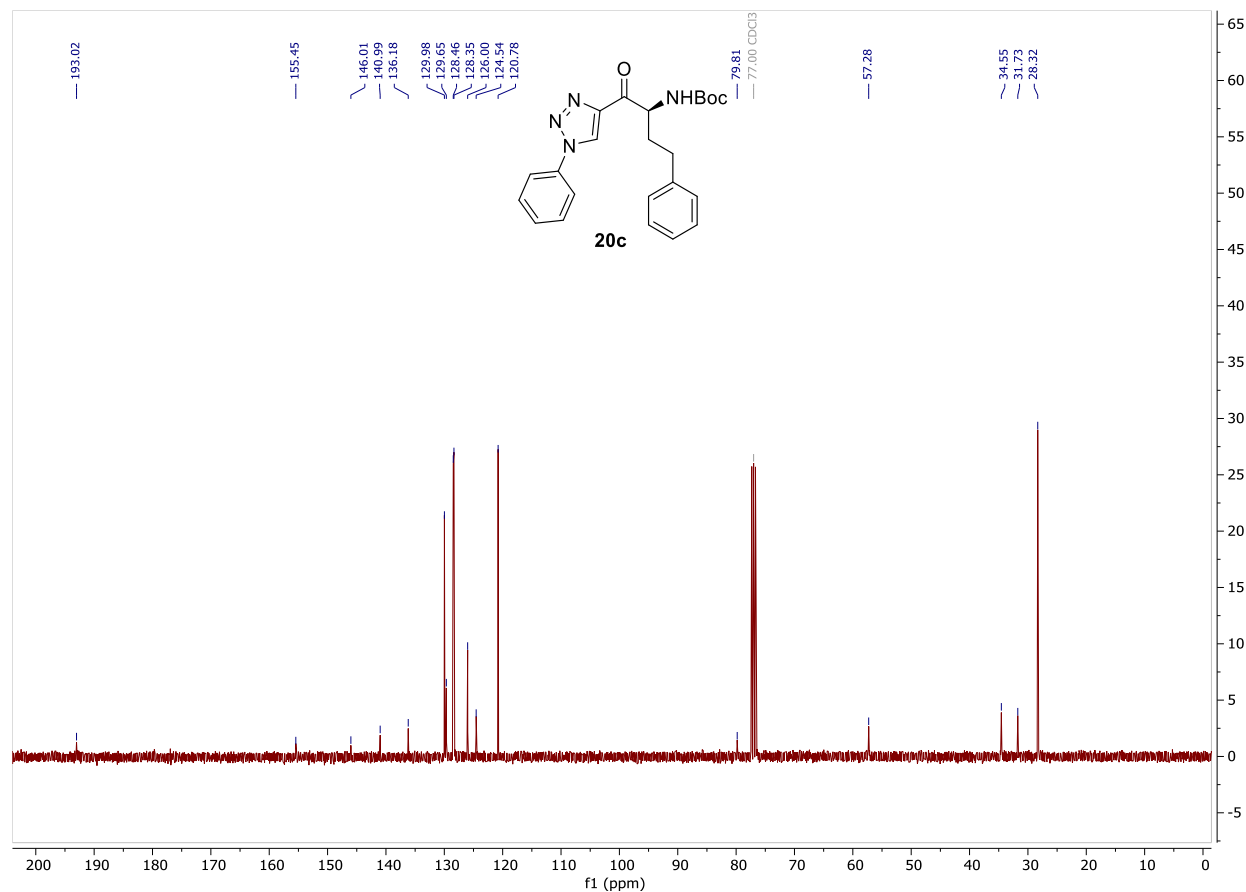

Compound **20d** ( $^1\text{H}$  NMR, 400 MHz):

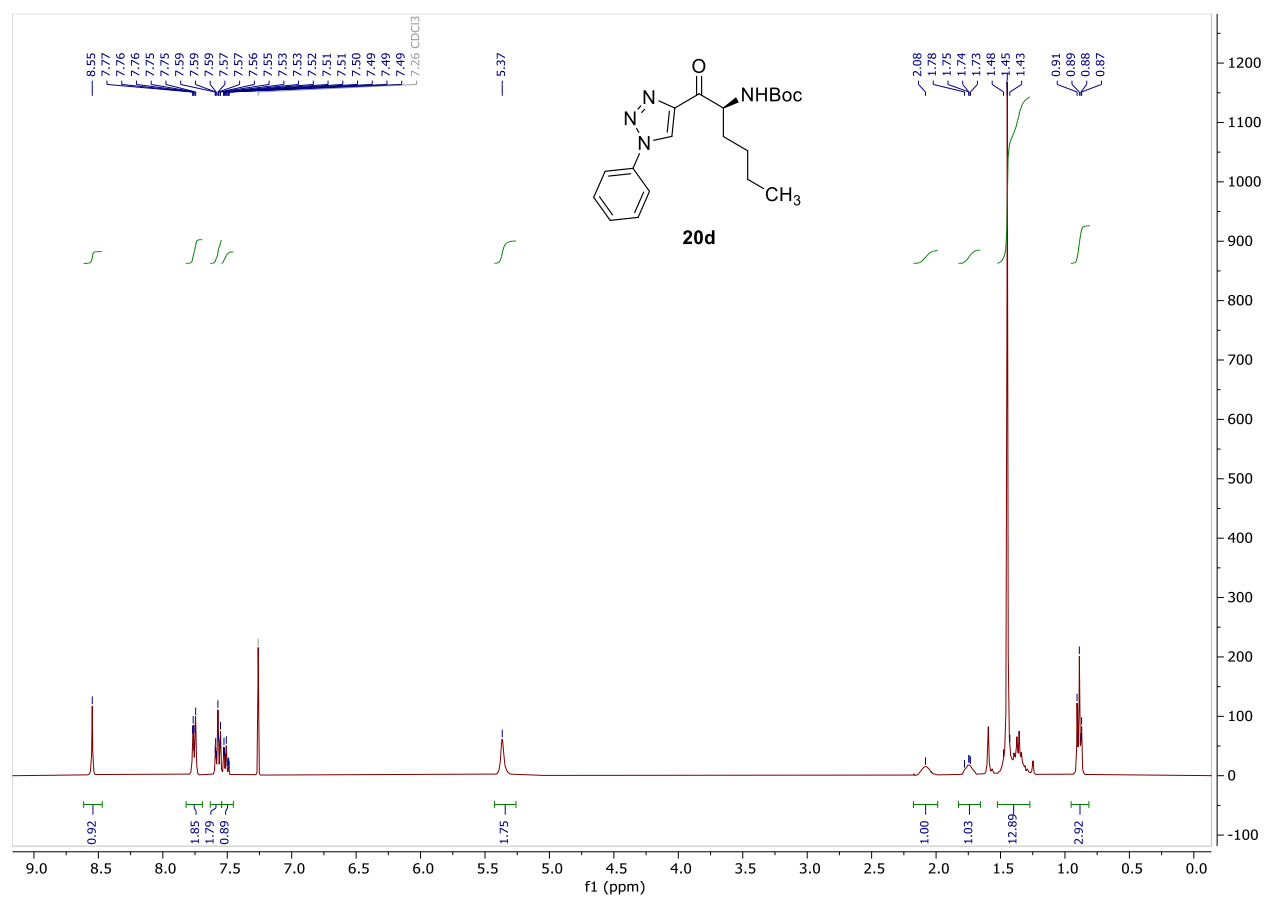

Compound **20d** ( $^{13}\text{C}$  NMR, 101 MHz):

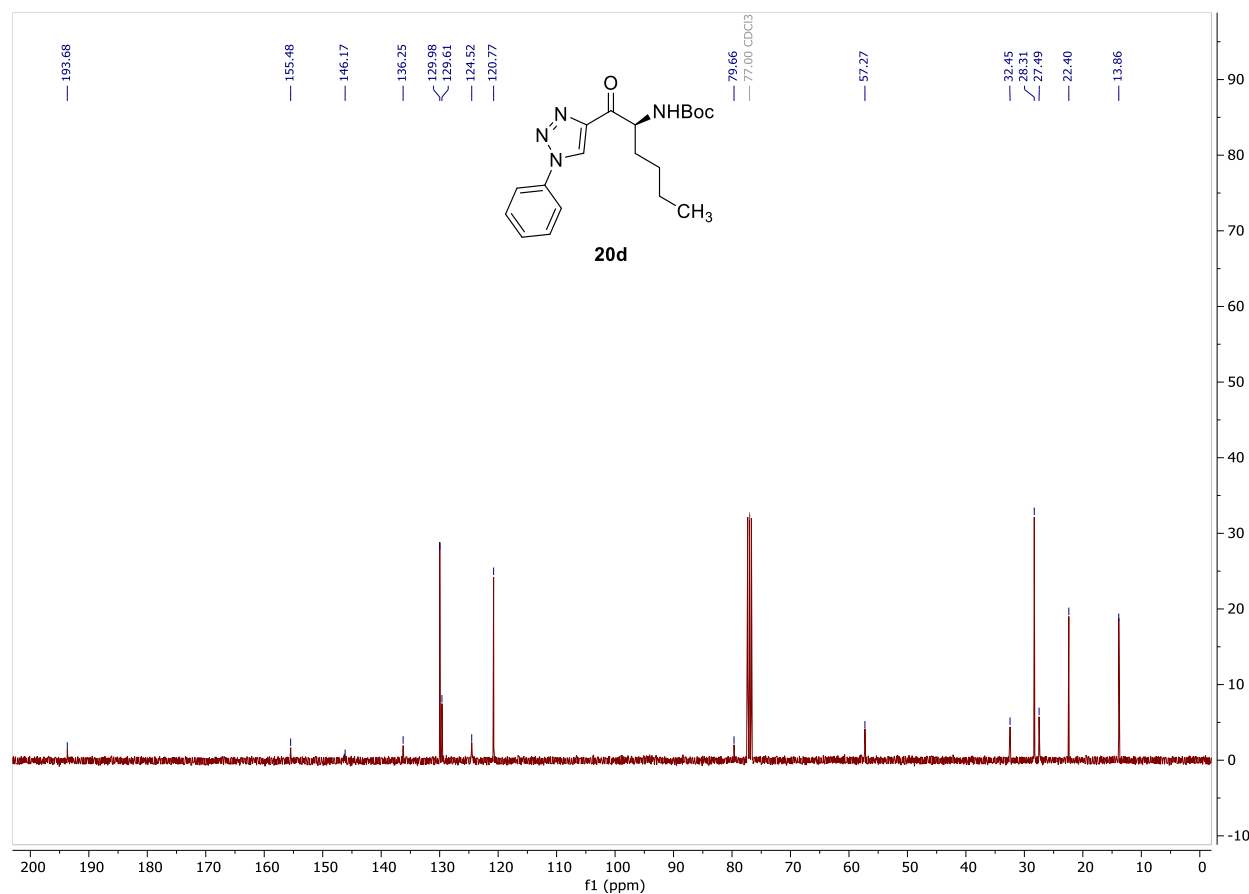

Compound **20e** ( $^1\text{H}$  NMR, 400 MHz):

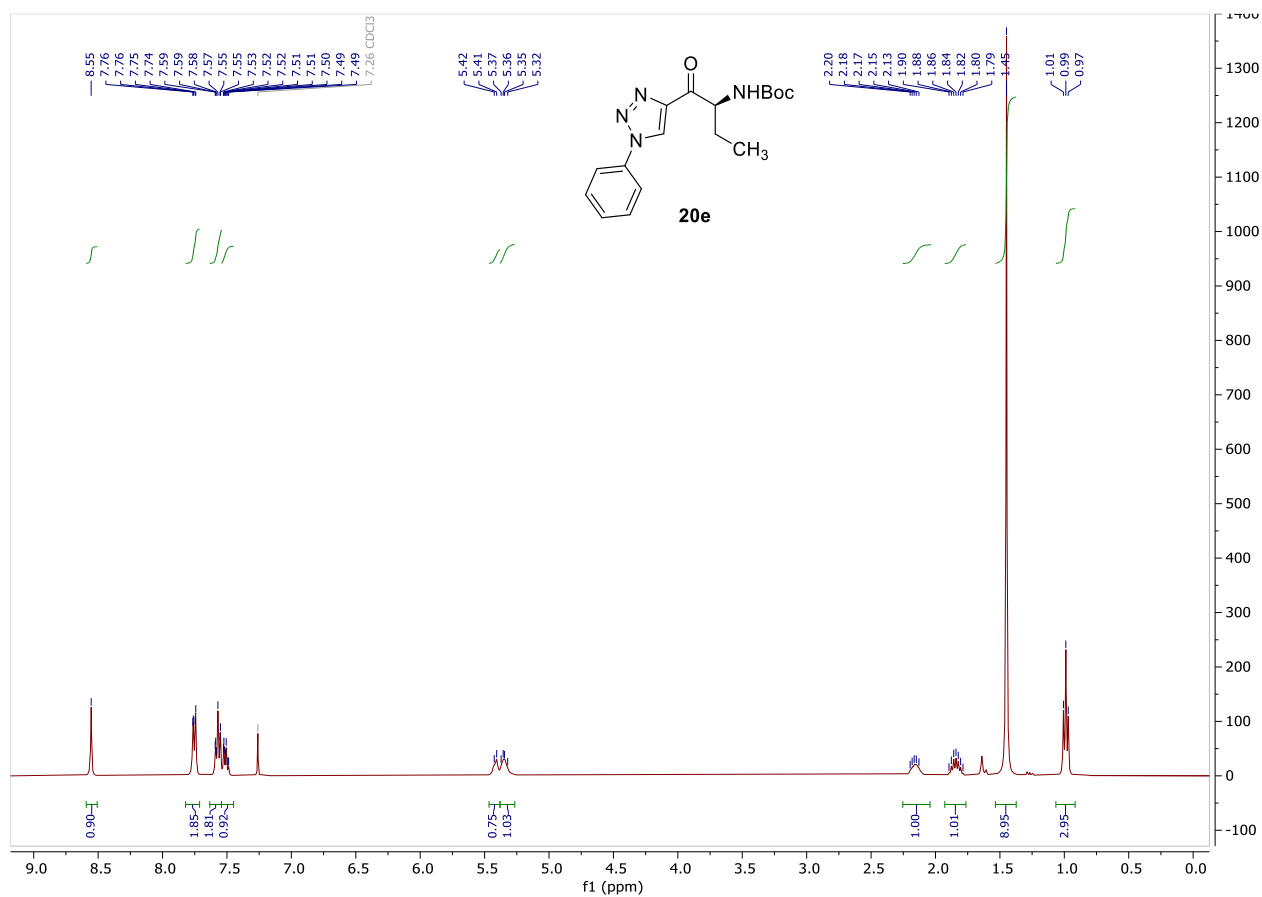

Compound **20e** ( $^{13}\text{C}$  NMR, 101 MHz):

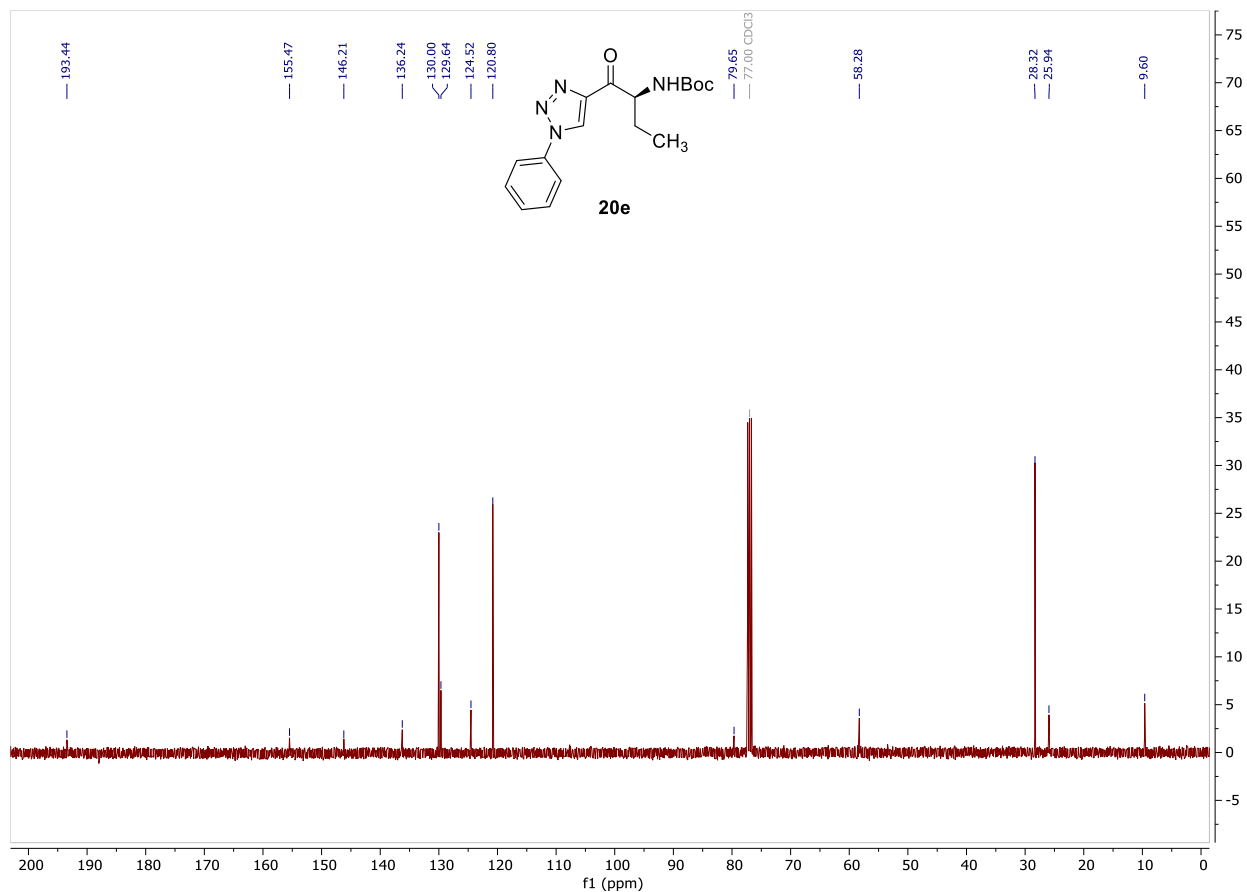

Compound **20f** ( $^1\text{H}$  NMR, 400 MHz):

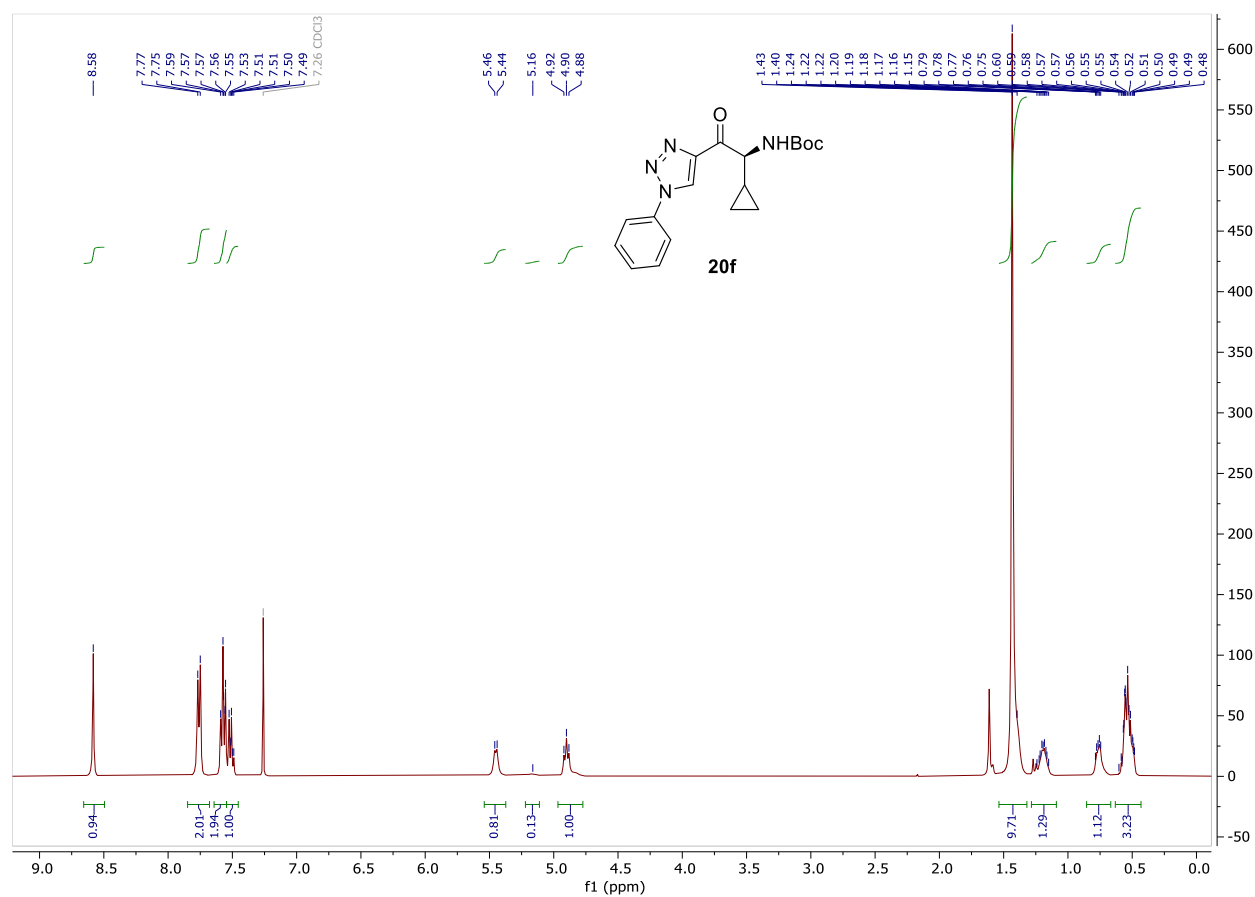

Compound **20f** ( $^{13}\text{C}$  NMR, 101 MHz):

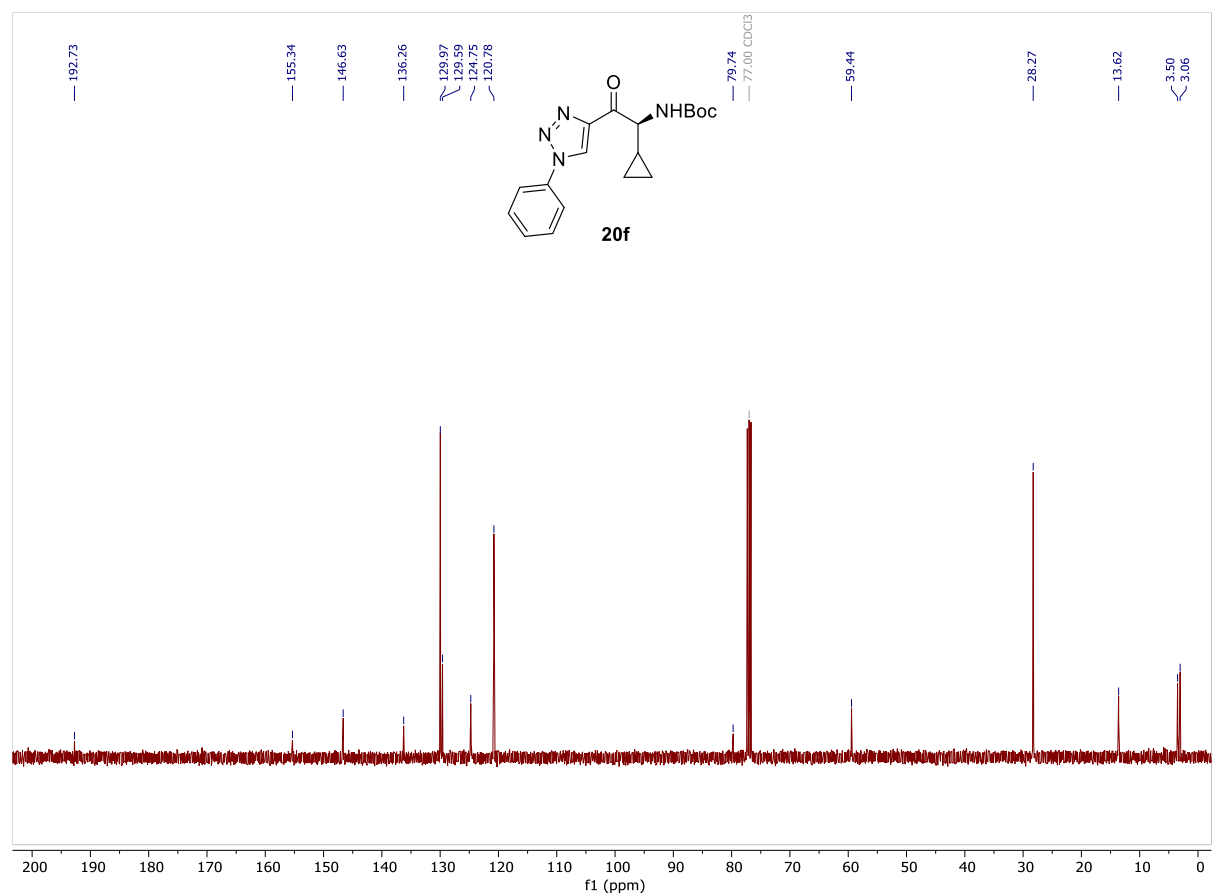



Compound **31a** ( $^1\text{H}$  NMR, 400 MHz):

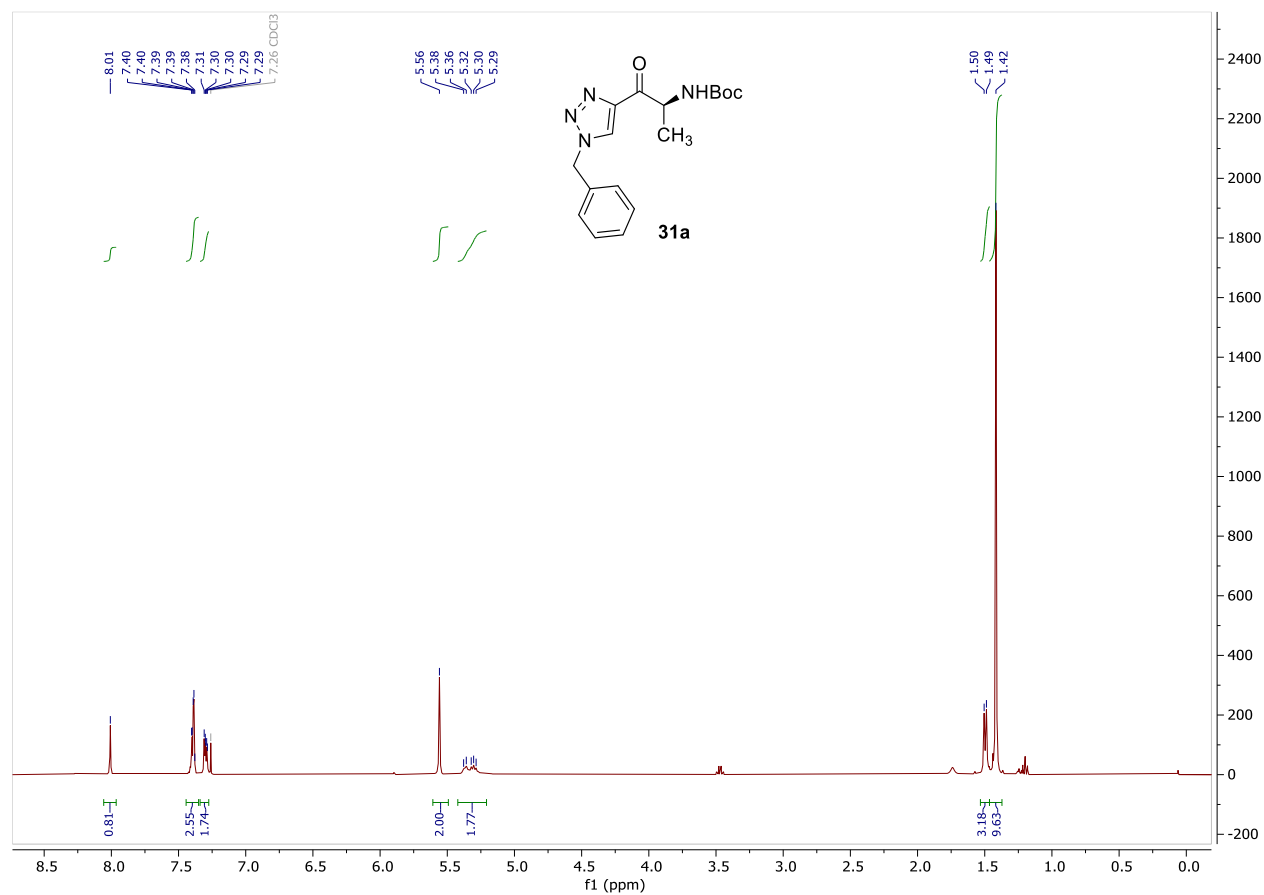

Compound **31a** ( $^{13}\text{C}$  NMR, 101 MHz):

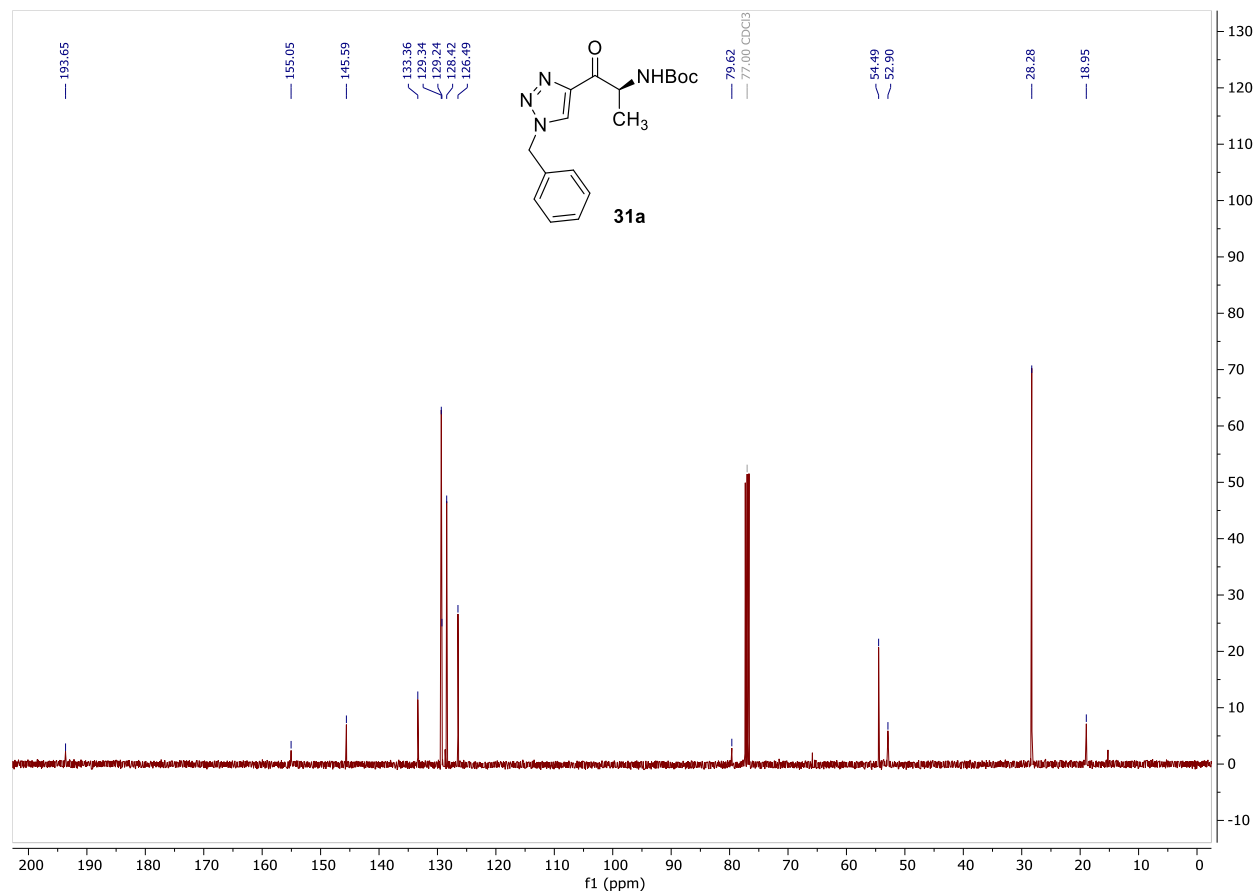

Compound **31b** ( $^1\text{H}$  NMR, 400 MHz):

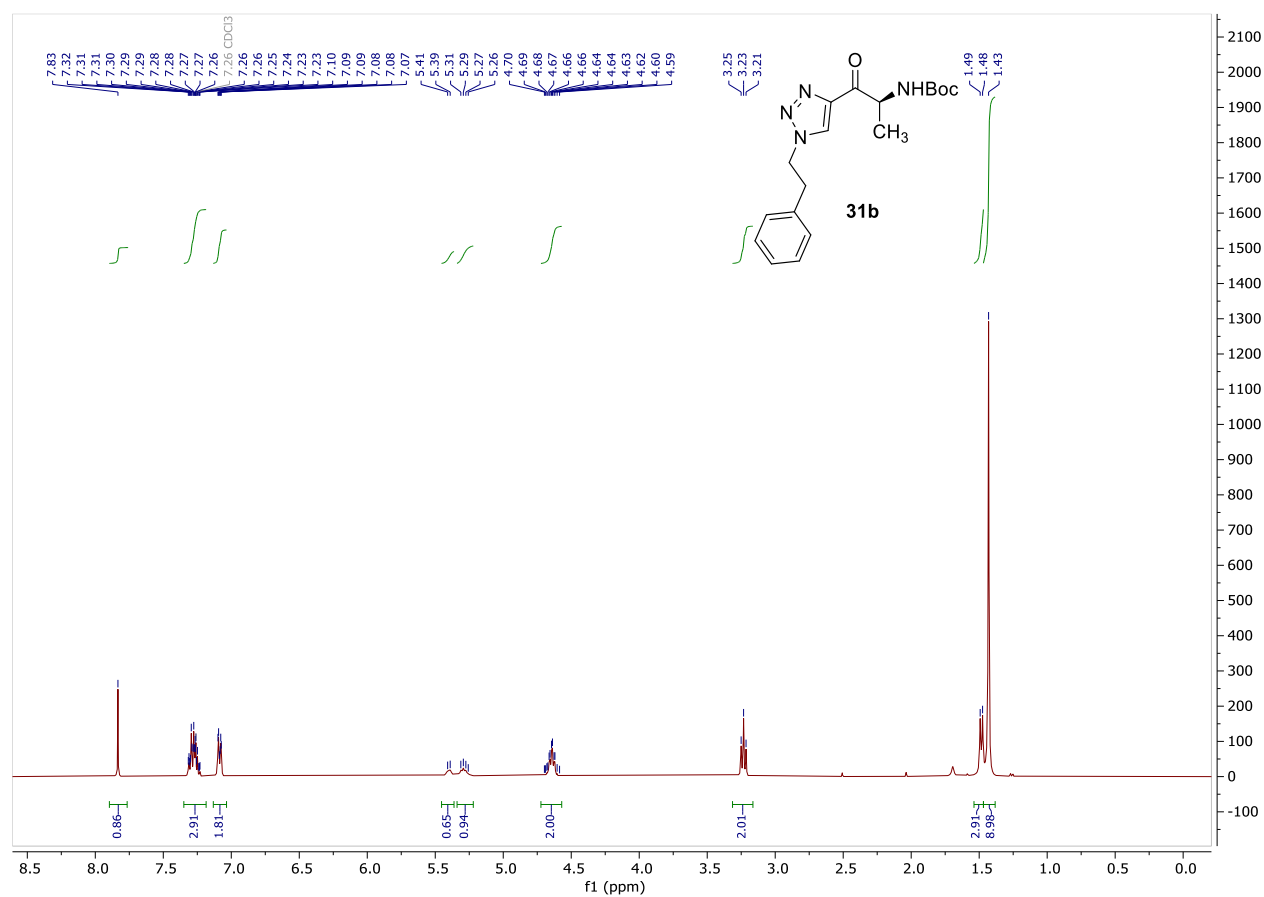

Compound **31b** ( $^{13}\text{C}$  NMR, 101 MHz):

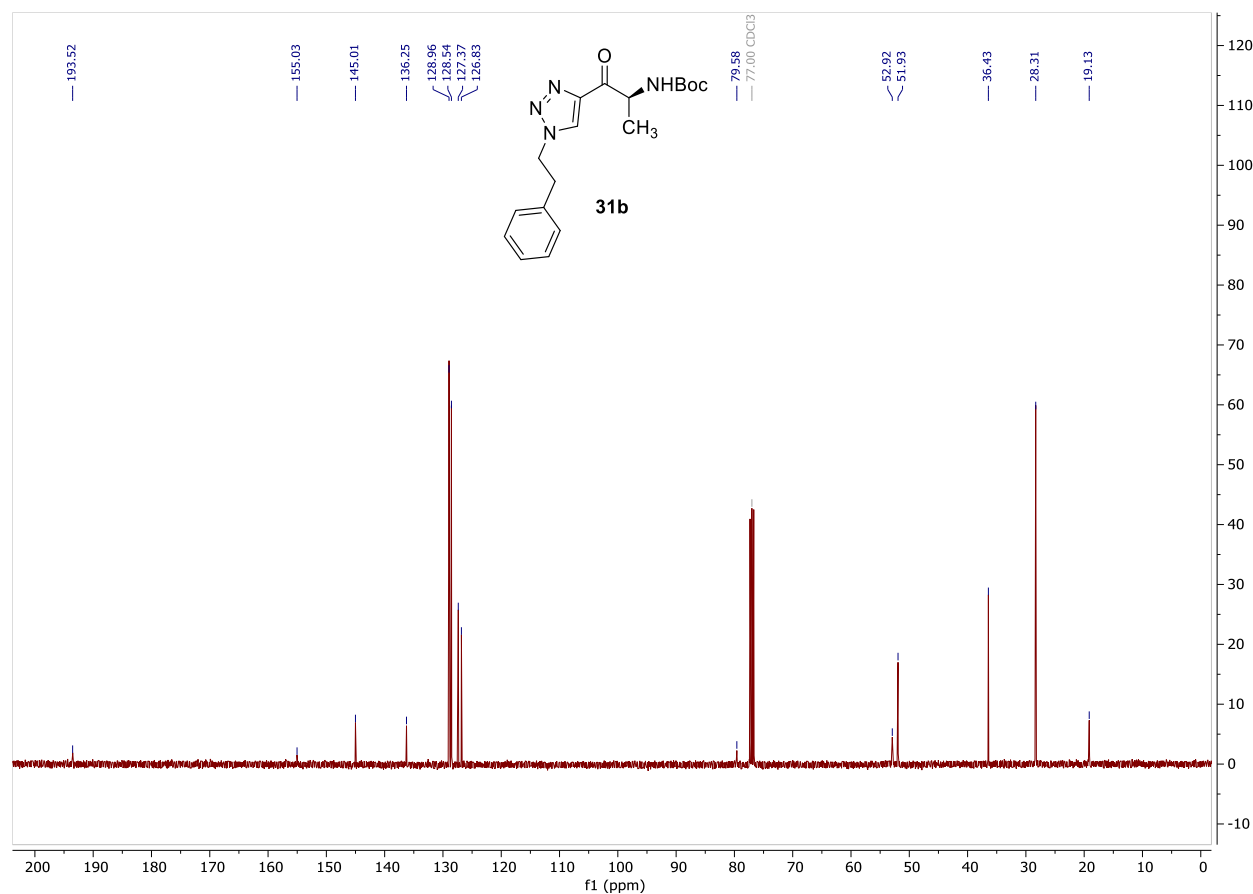

Compound **27a** ( $^1\text{H}$  NMR, 400 MHz):

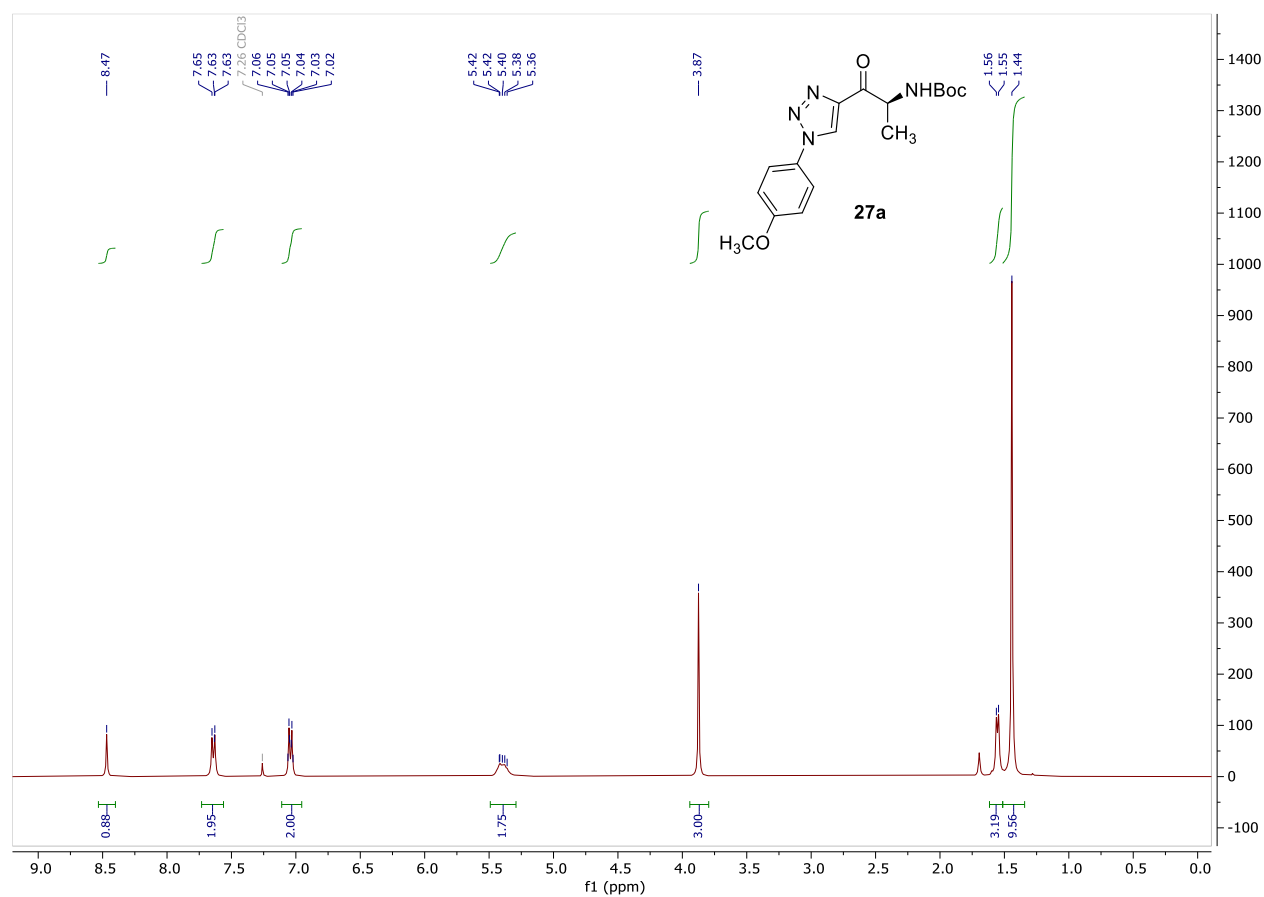

Compound **27a** ( $^{13}\text{C}$  NMR, 101 MHz):

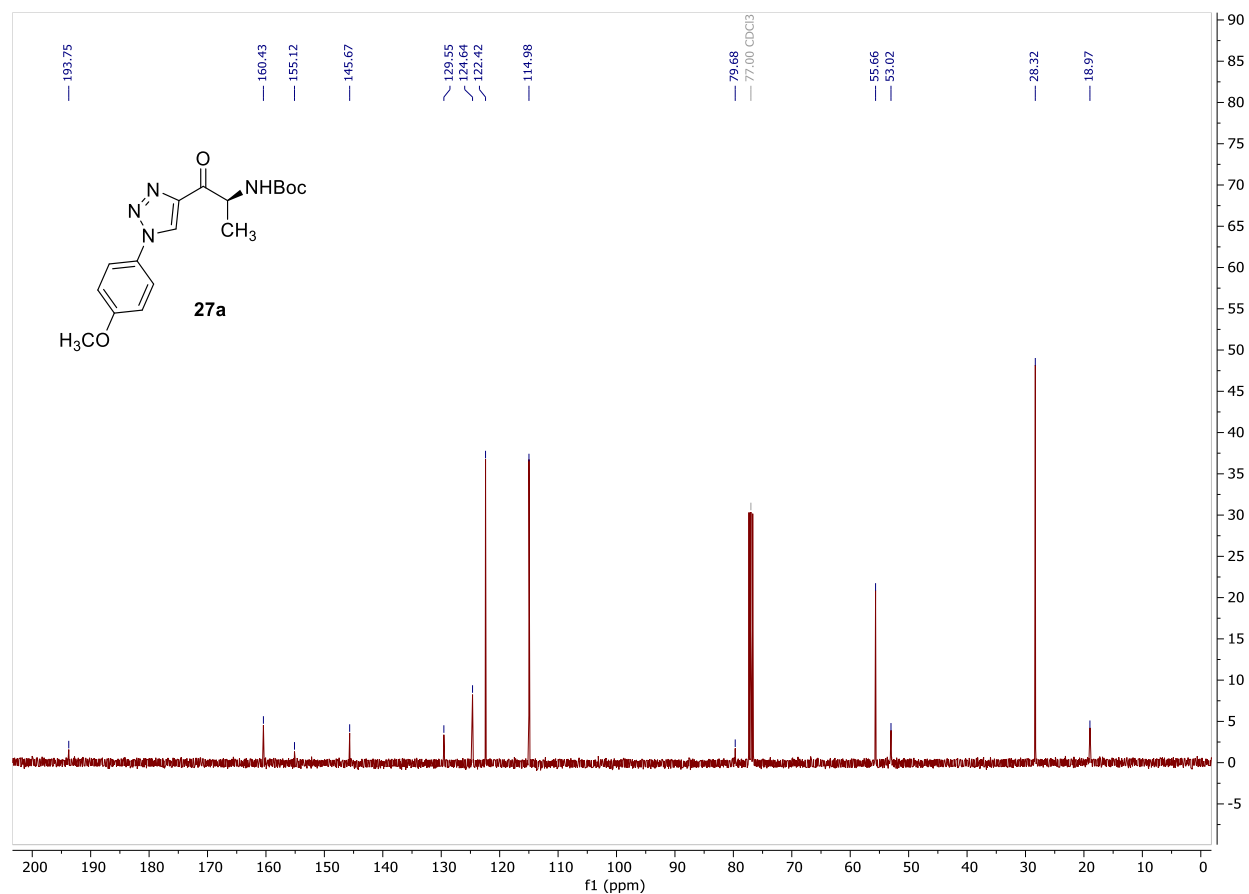

Compound **27b** ( $^1\text{H}$  NMR, 400 MHz):

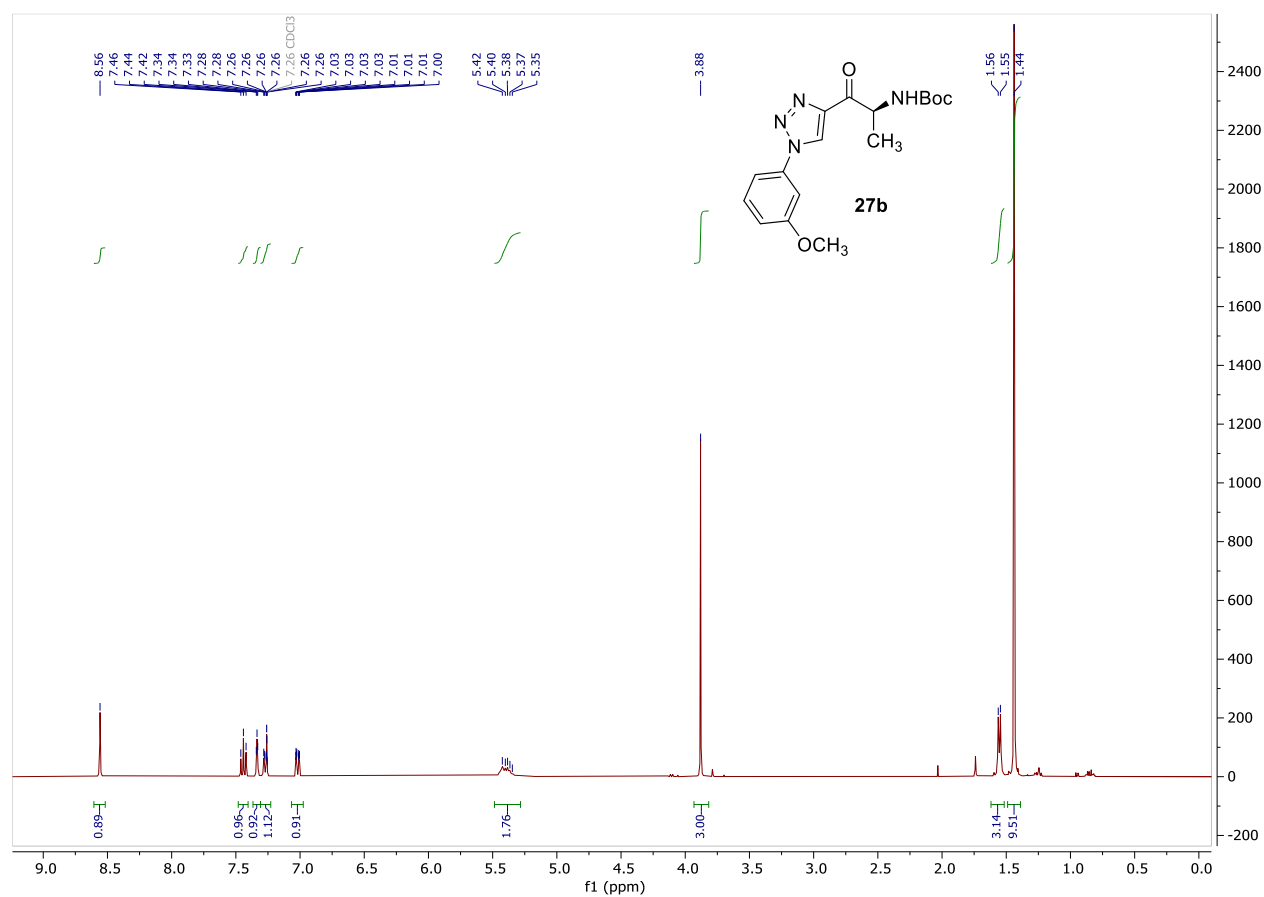

Compound **27b** ( $^{13}\text{C}$  NMR, 101 MHz):

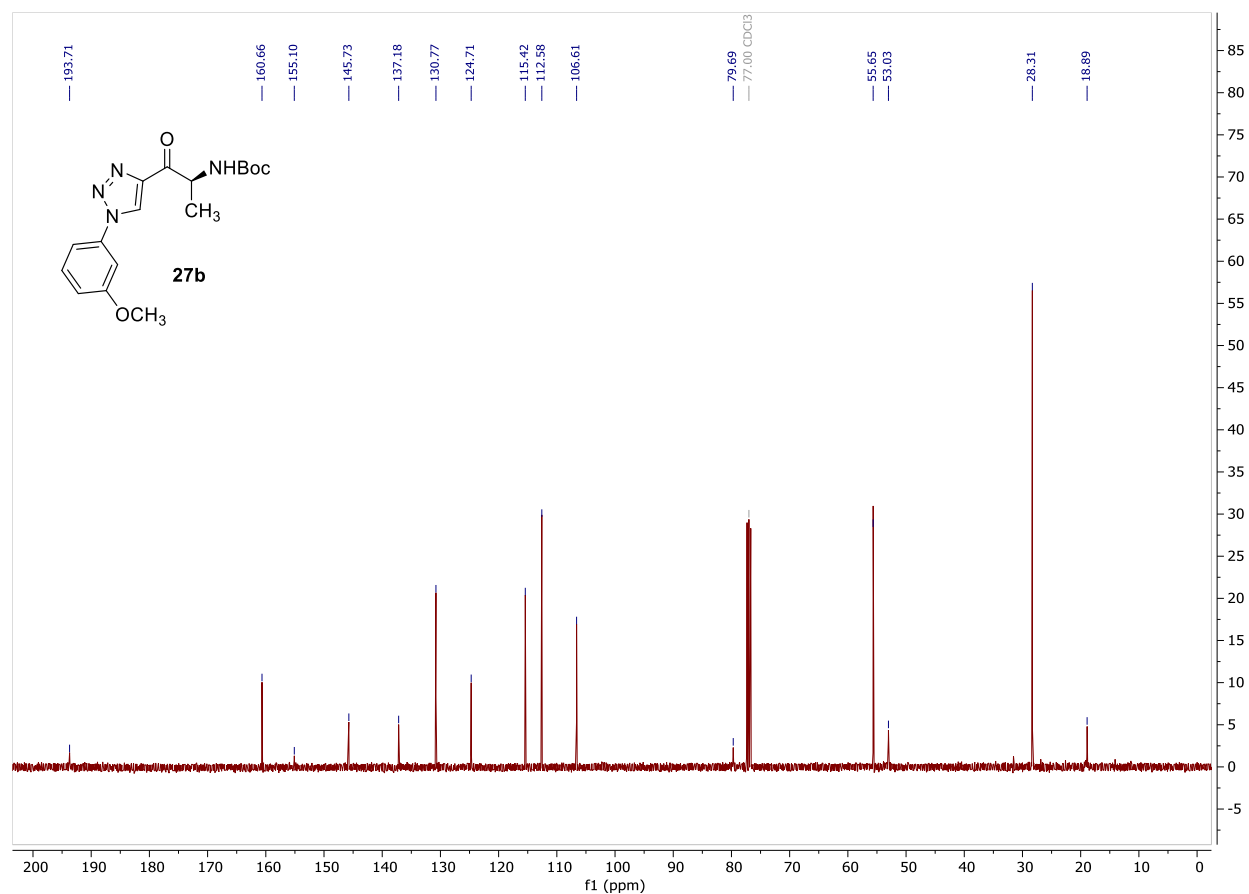

Compound **27c** ( $^1\text{H}$  NMR, 400 MHz):

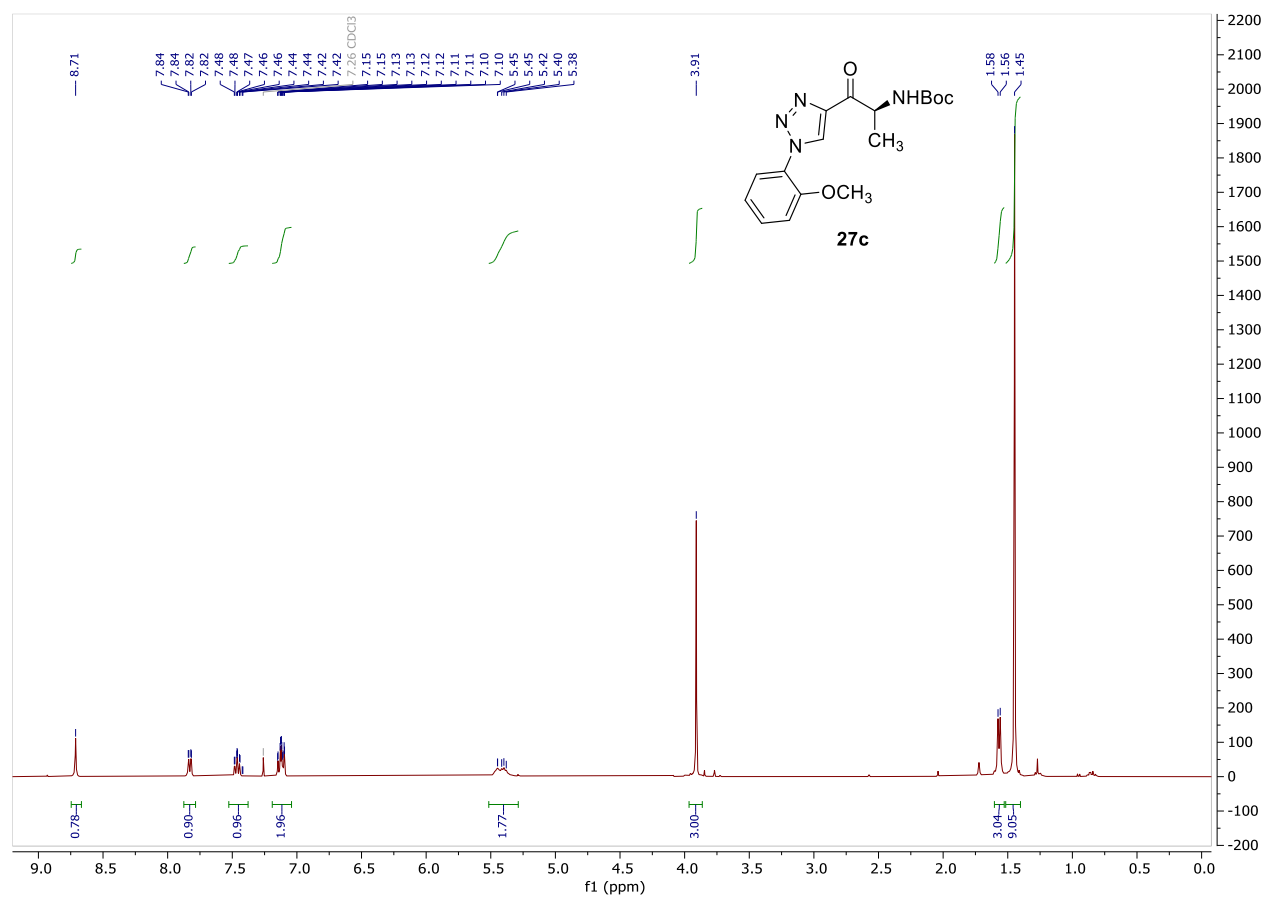

Compound **27c** ( $^{13}\text{C}$  NMR, 101 MHz):

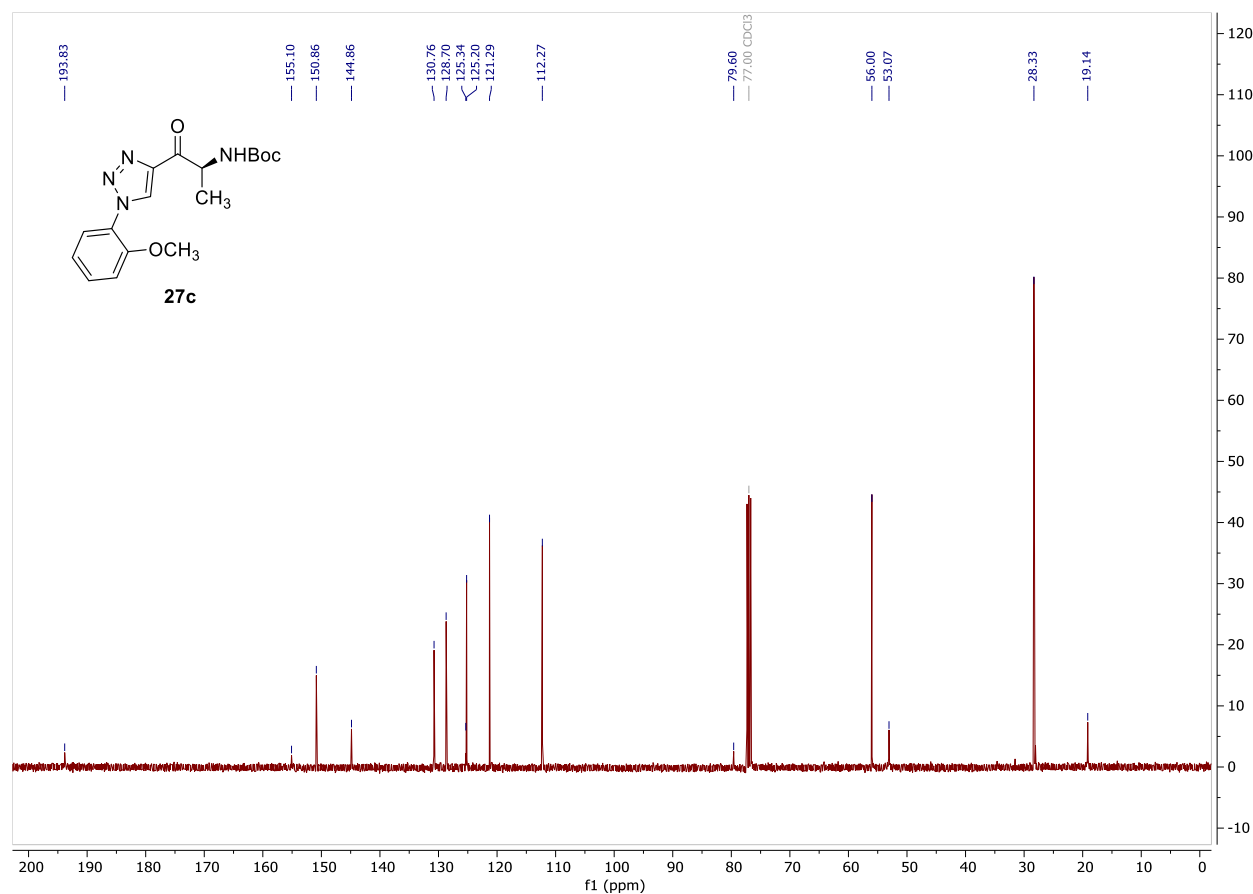

Compound **27d** ( $^1\text{H}$  NMR, 400 MHz):

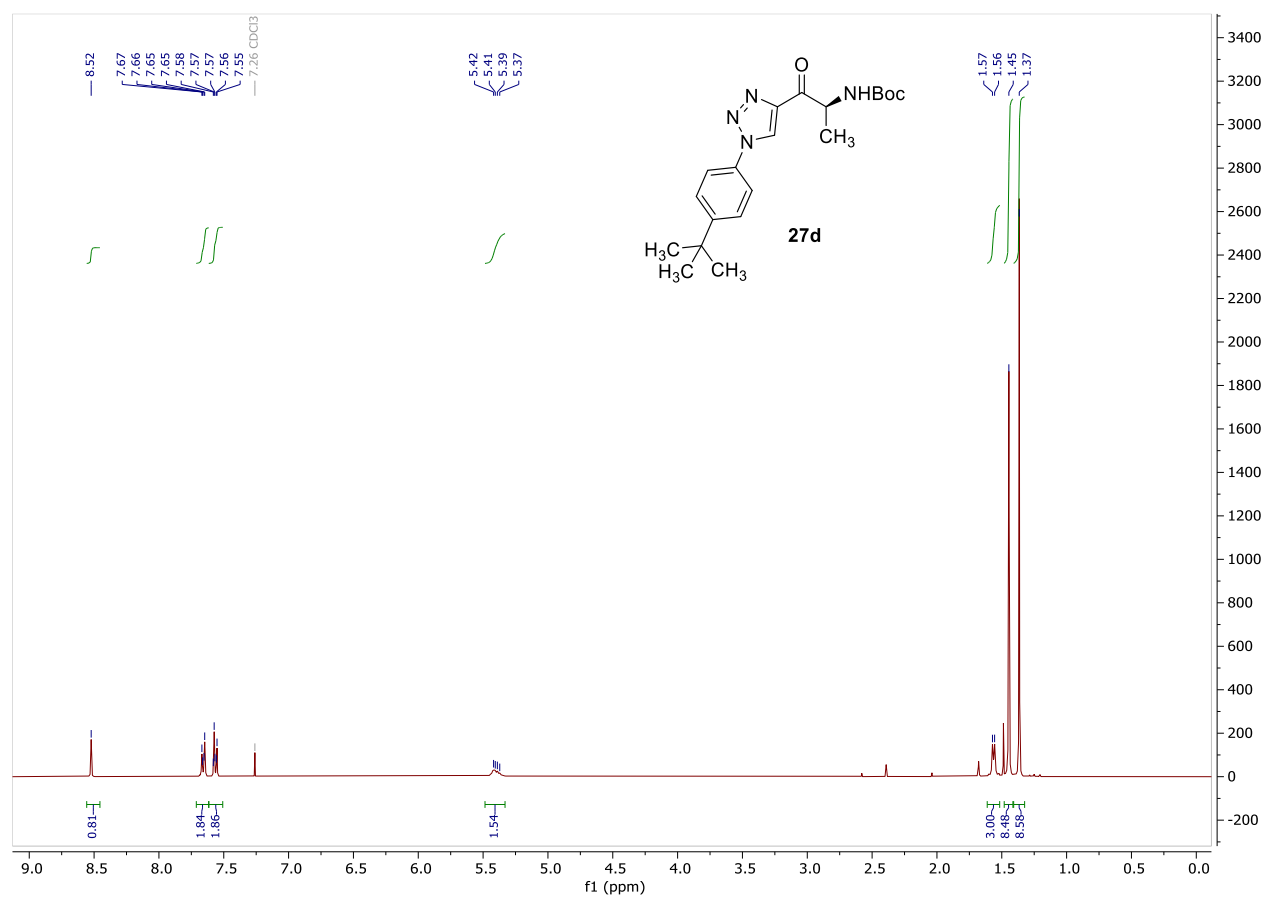

Compound **27d** ( $^{13}\text{C}$  NMR, 101 MHz):

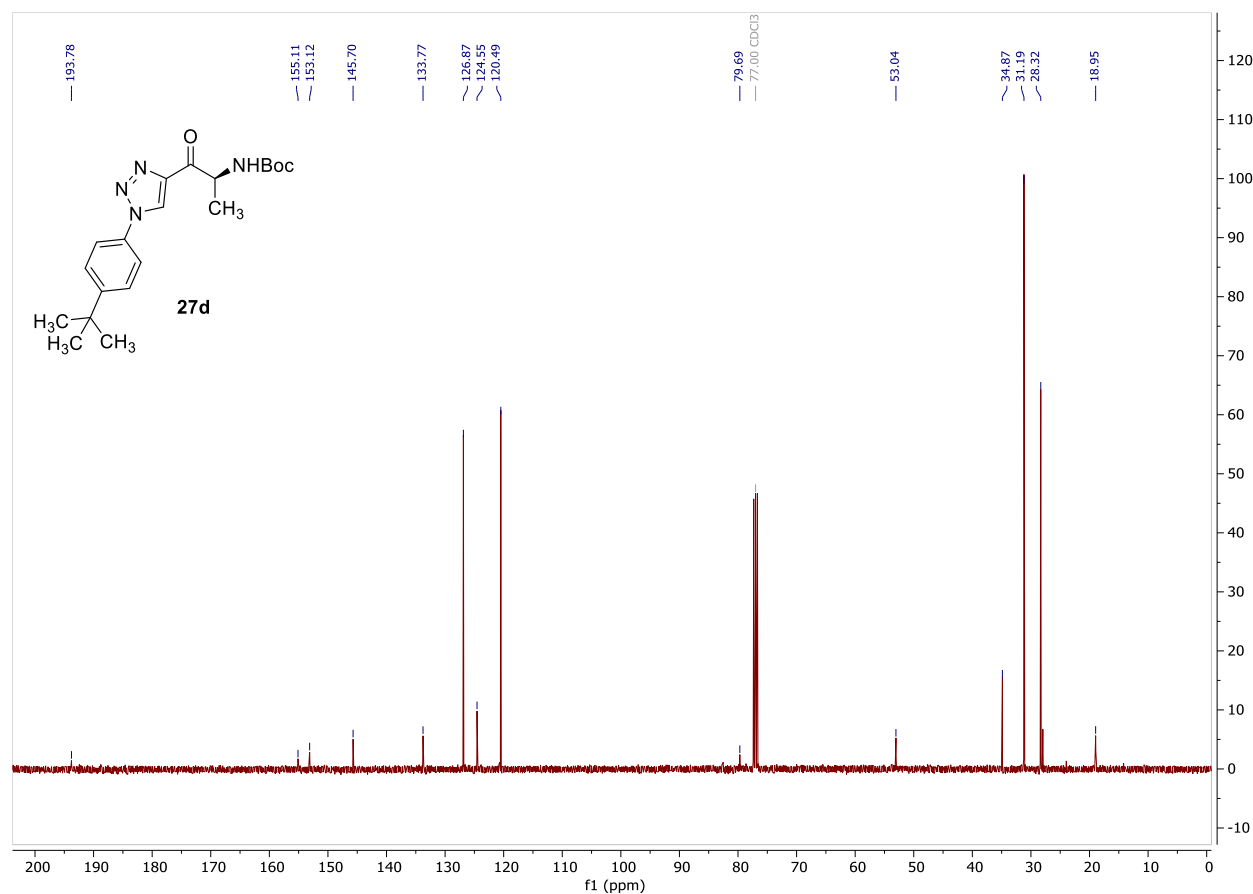

Compound **27e** ( $^1\text{H}$  NMR, 400 MHz):

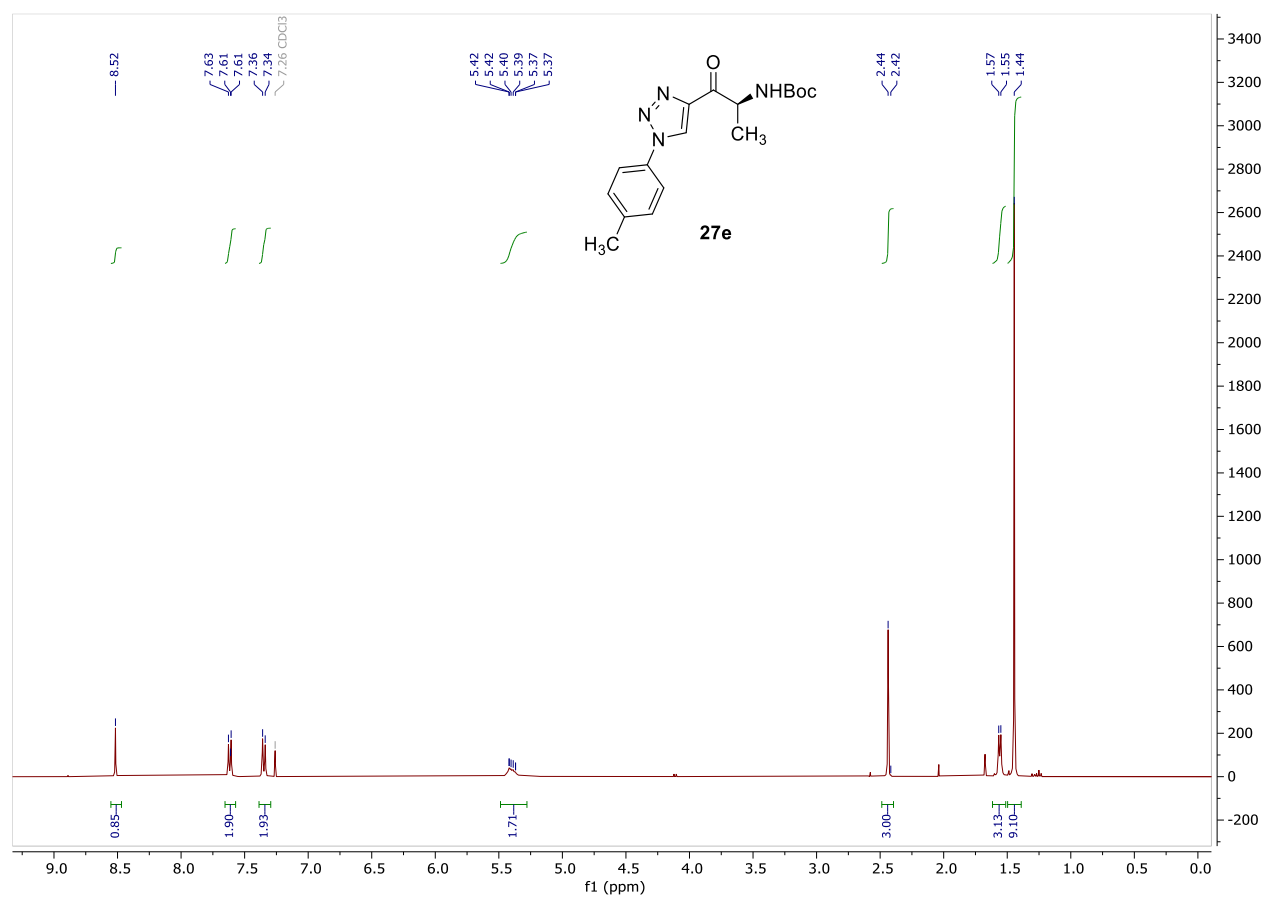

Compound **27e** ( $^{13}\text{C}$  NMR, 101 MHz):

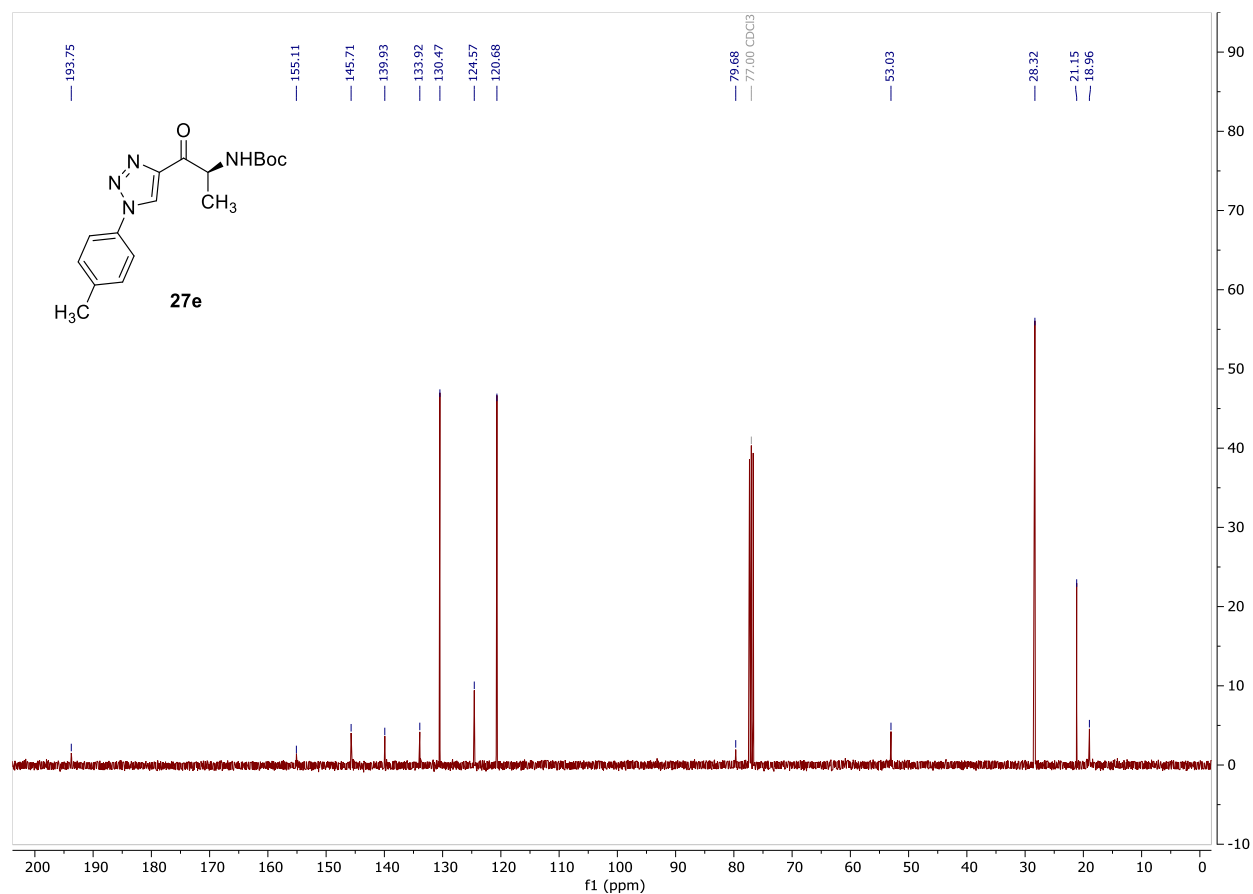

Compound **27f** ( $^1\text{H}$  NMR, 400 MHz):

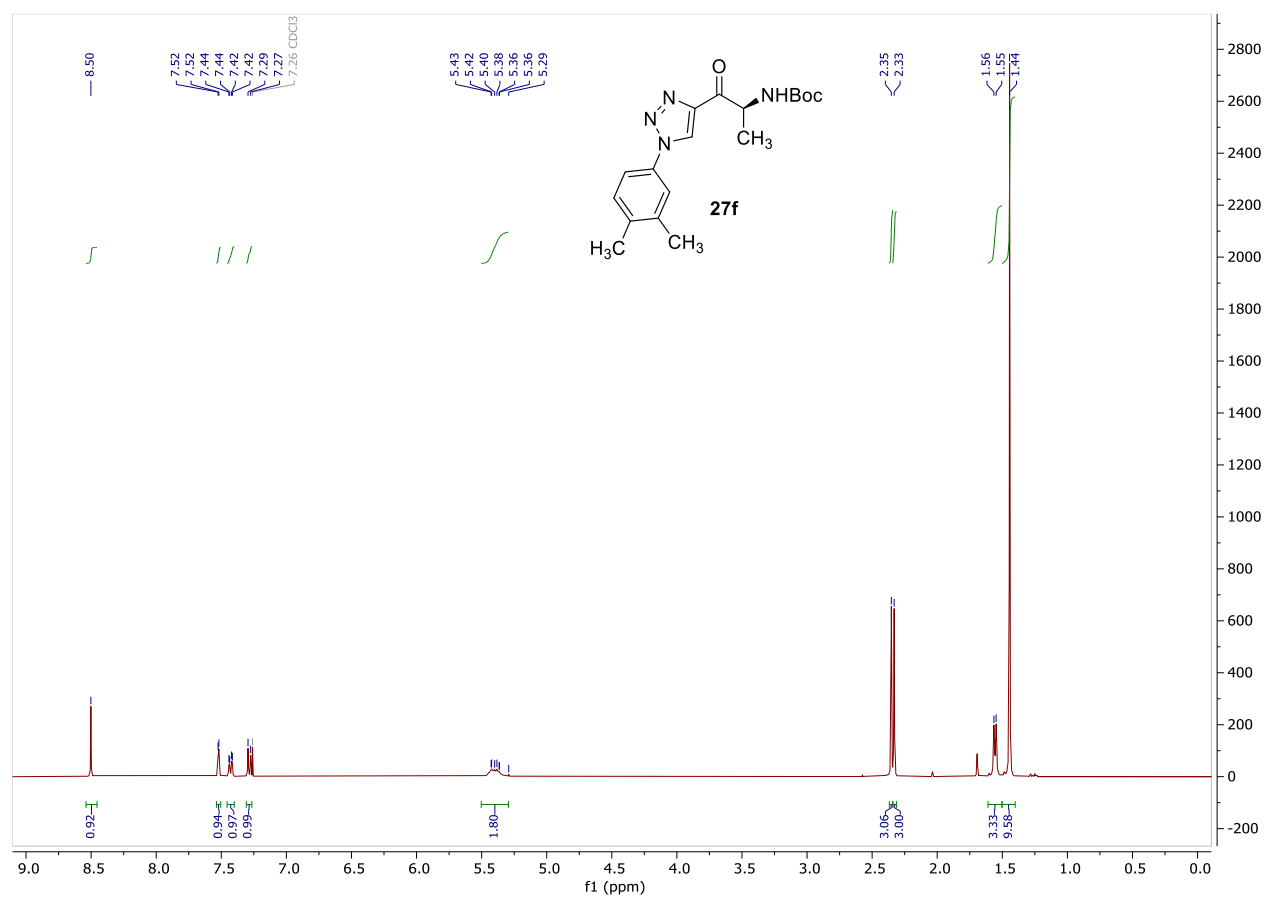

Compound **27f** ( $^{13}\text{C}$  NMR, 101 MHz):

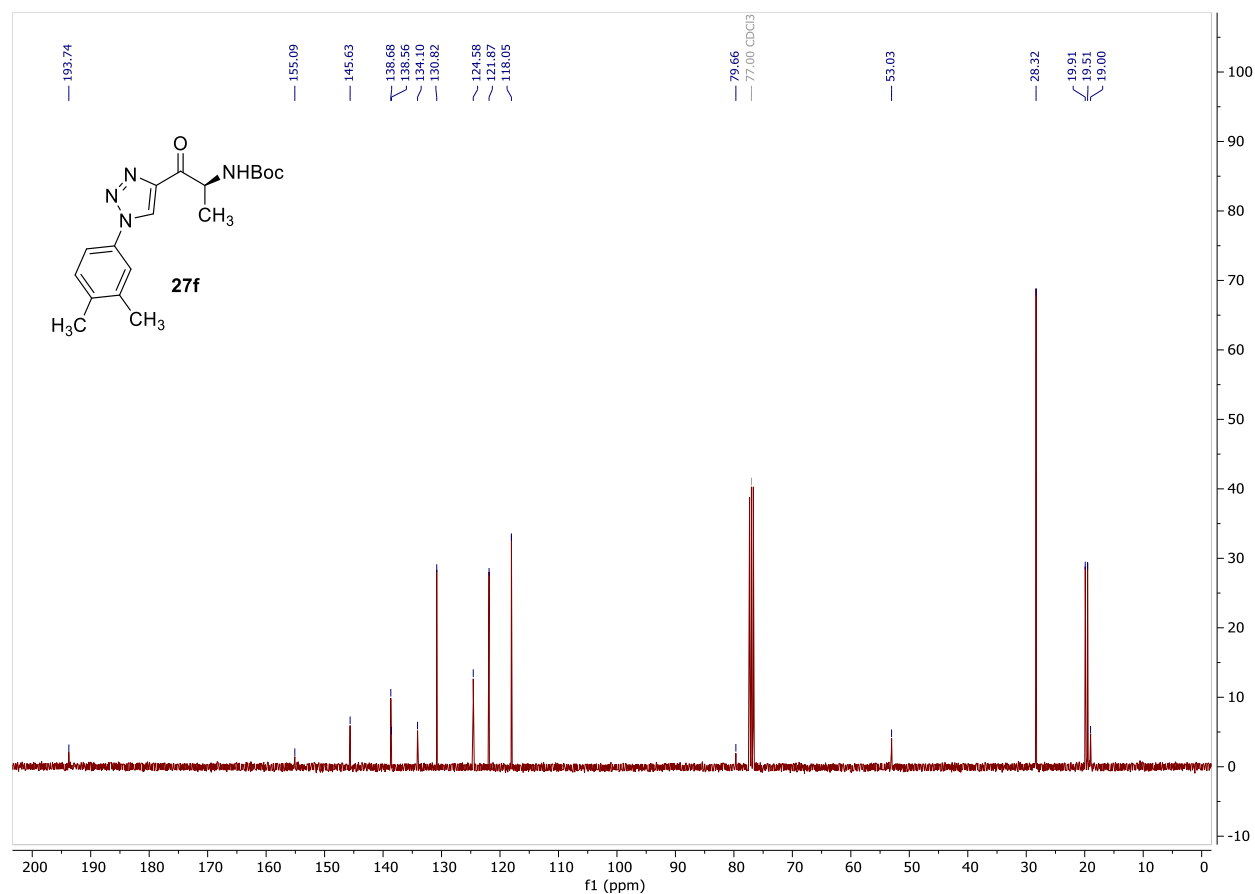



Compound **27g** ( $^1\text{H}$  NMR, 400 MHz):

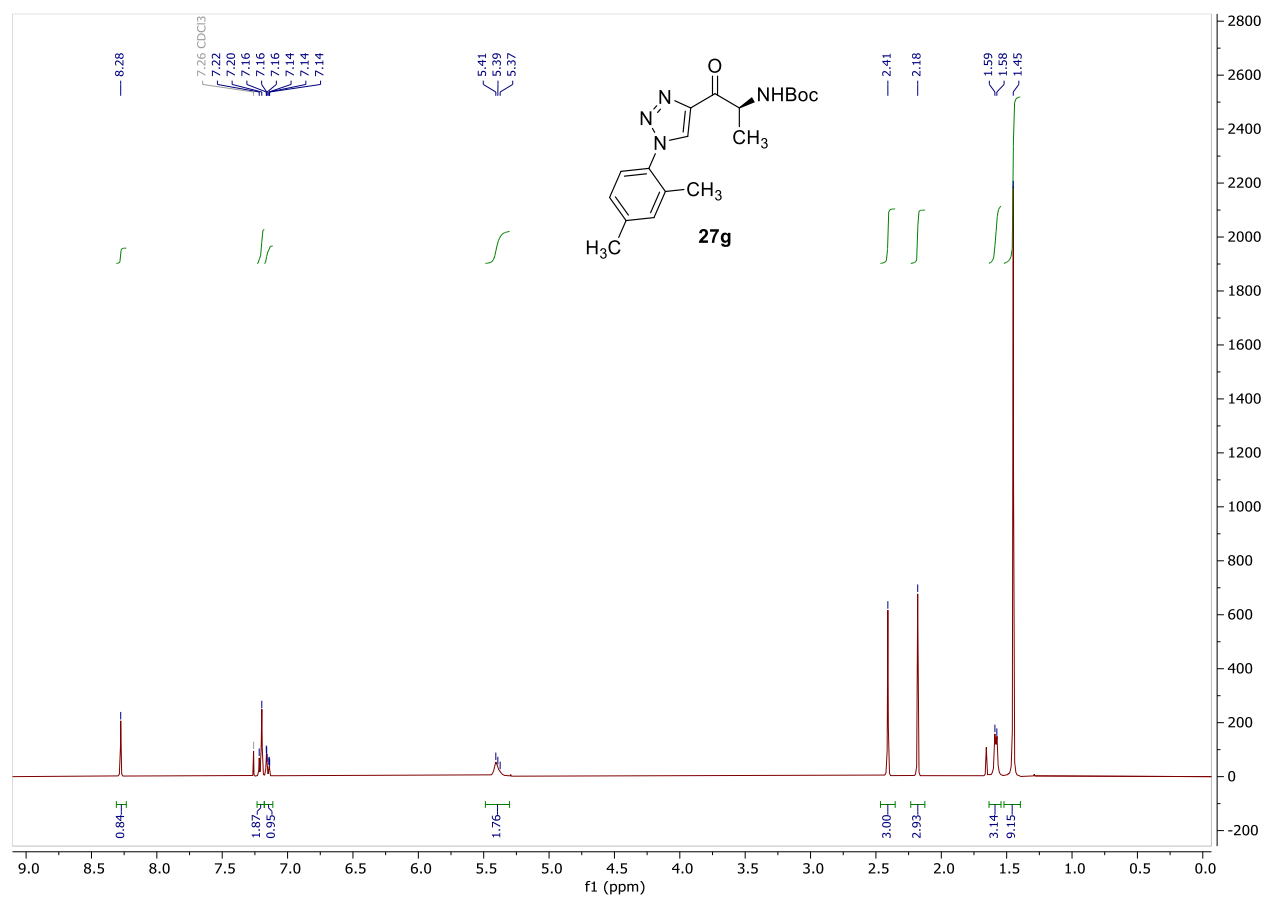

Compound **27g** ( $^{13}\text{C}$  NMR, 101 MHz):

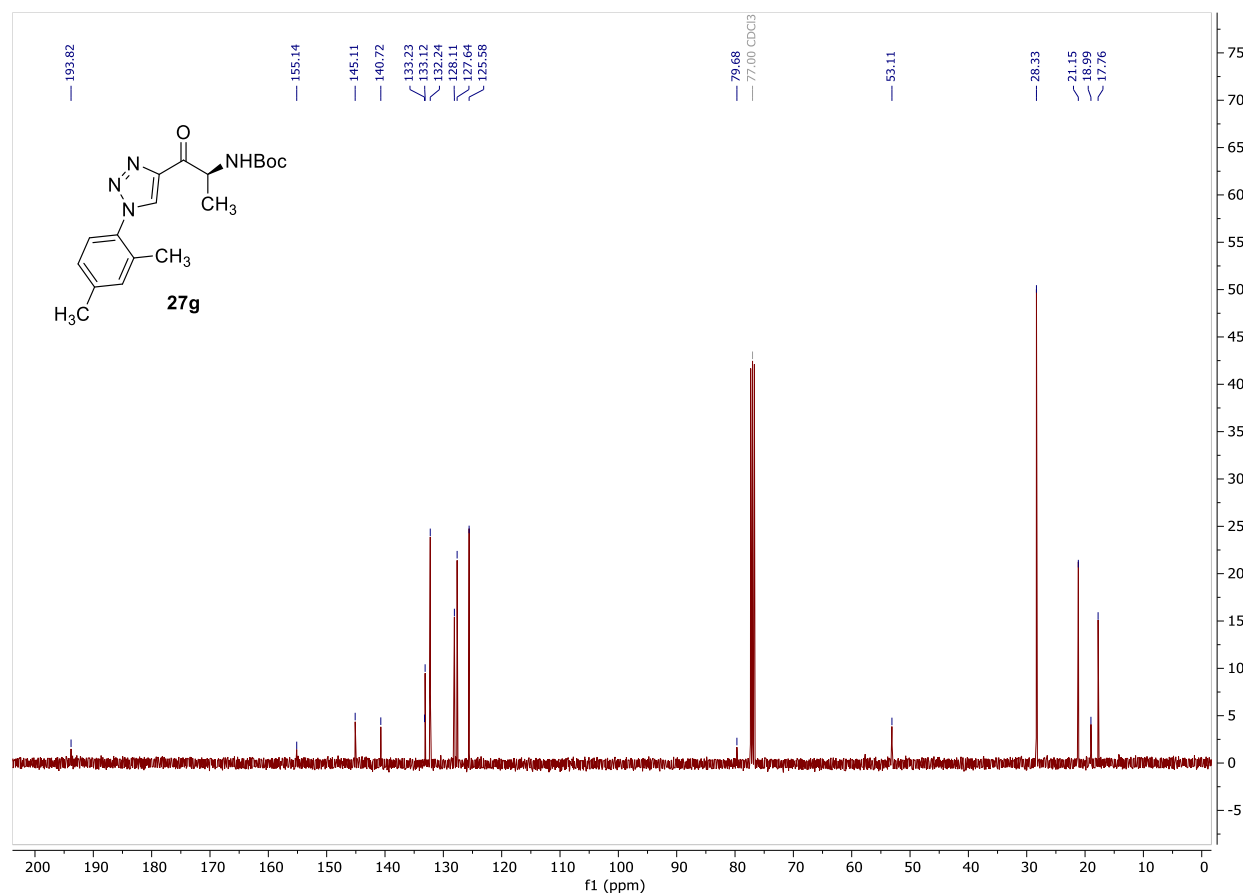

Compound **27h** ( $^1\text{H}$  NMR, 400 MHz):

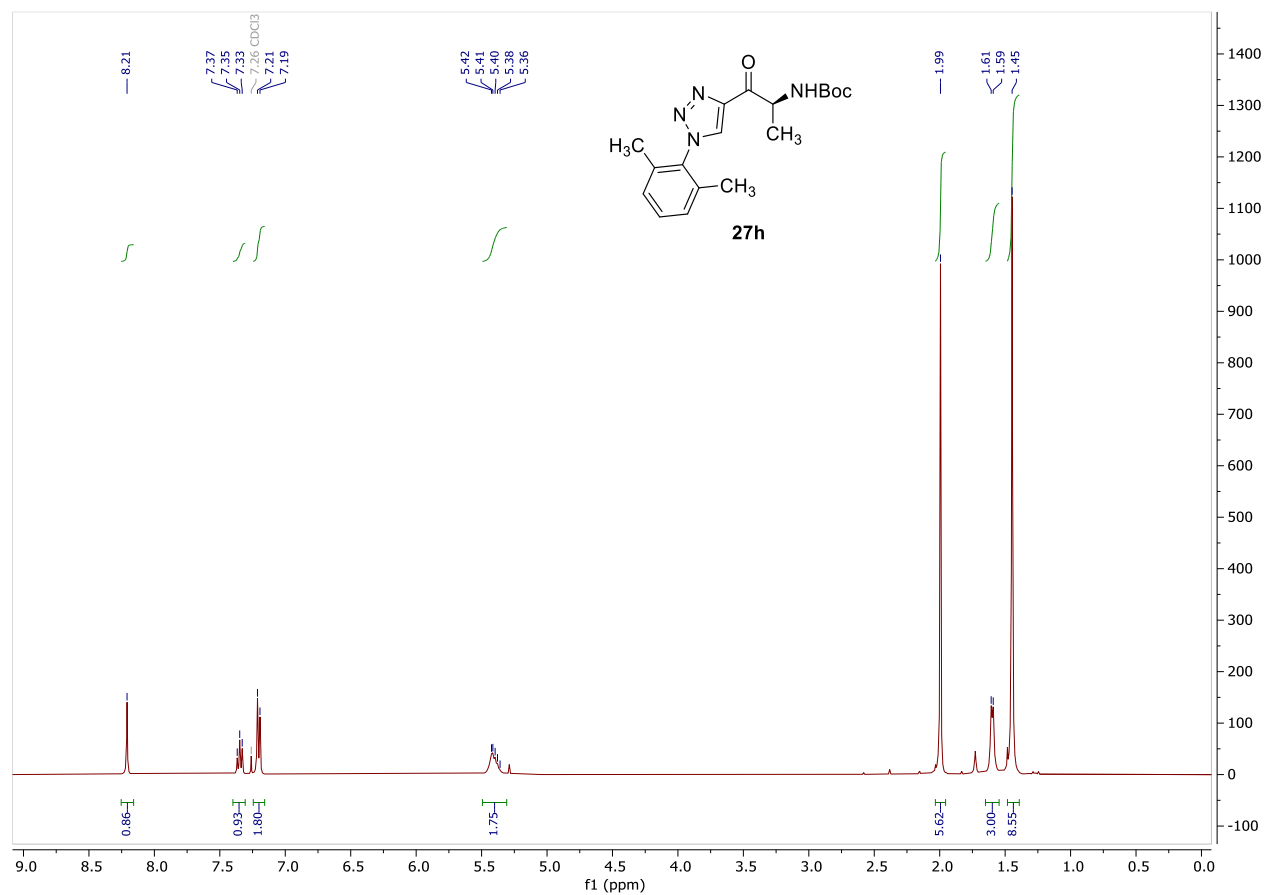

Compound **27h** ( $^{13}\text{C}$  NMR, 101 MHz):

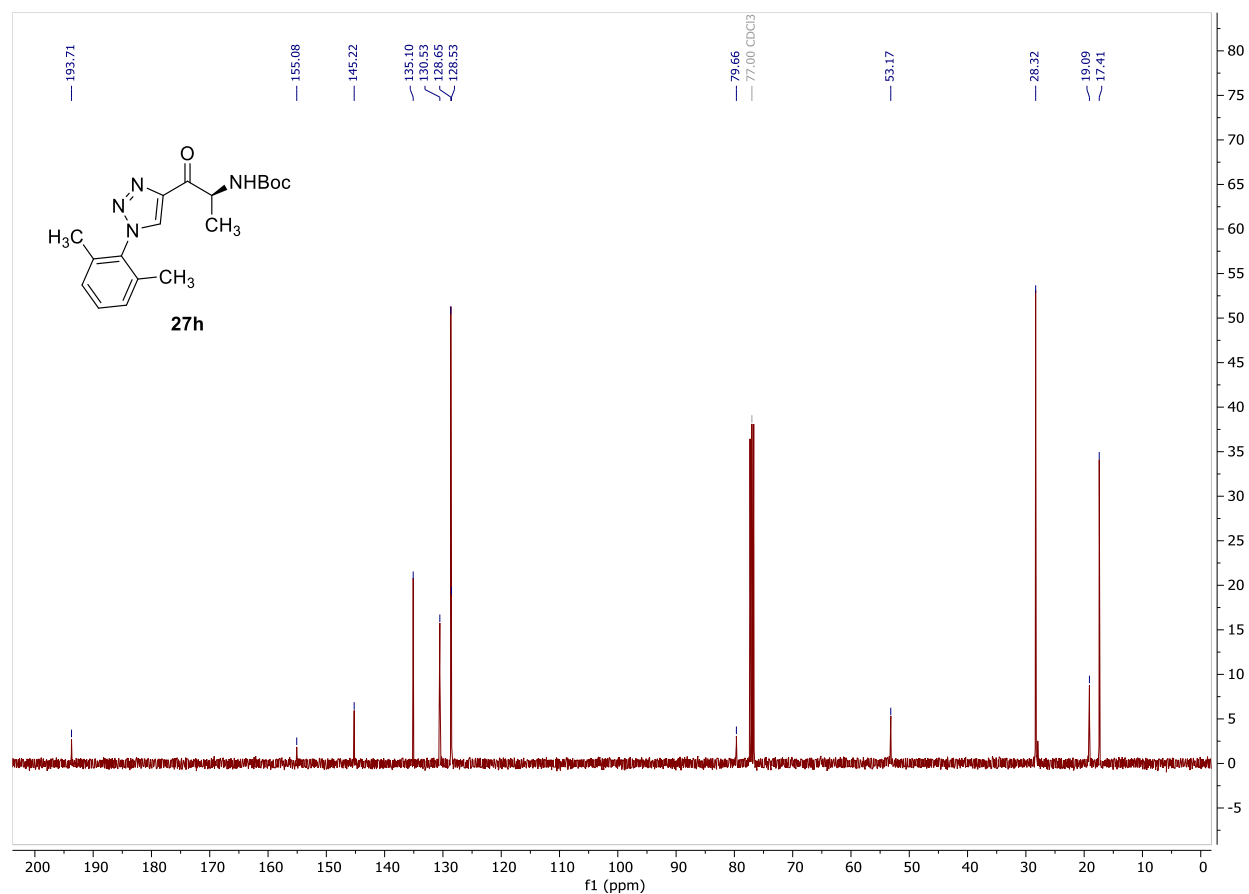

Compound **27i** ( $^1\text{H}$  NMR, 400 MHz):

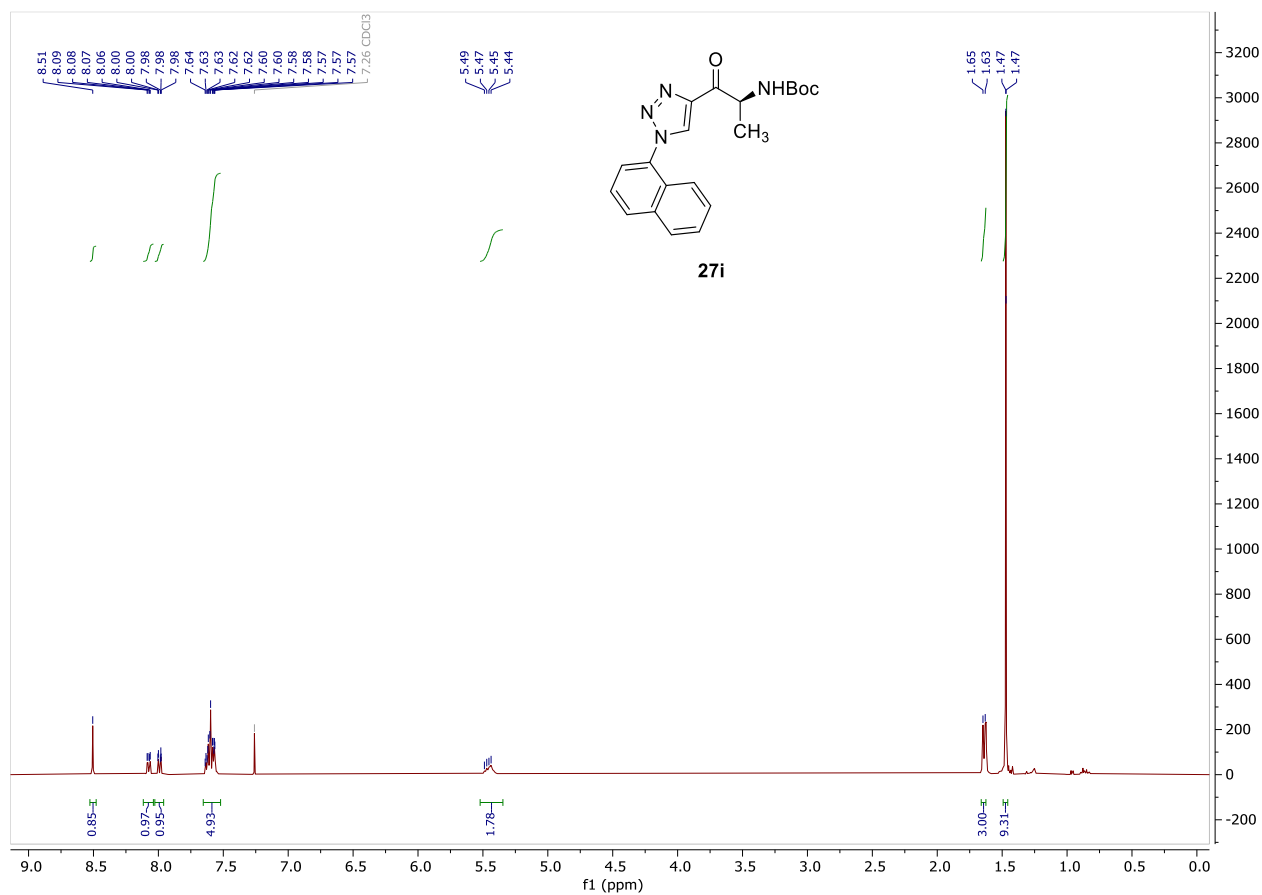

Compound **27i** ( $^{13}\text{C}$  NMR, 101 MHz):

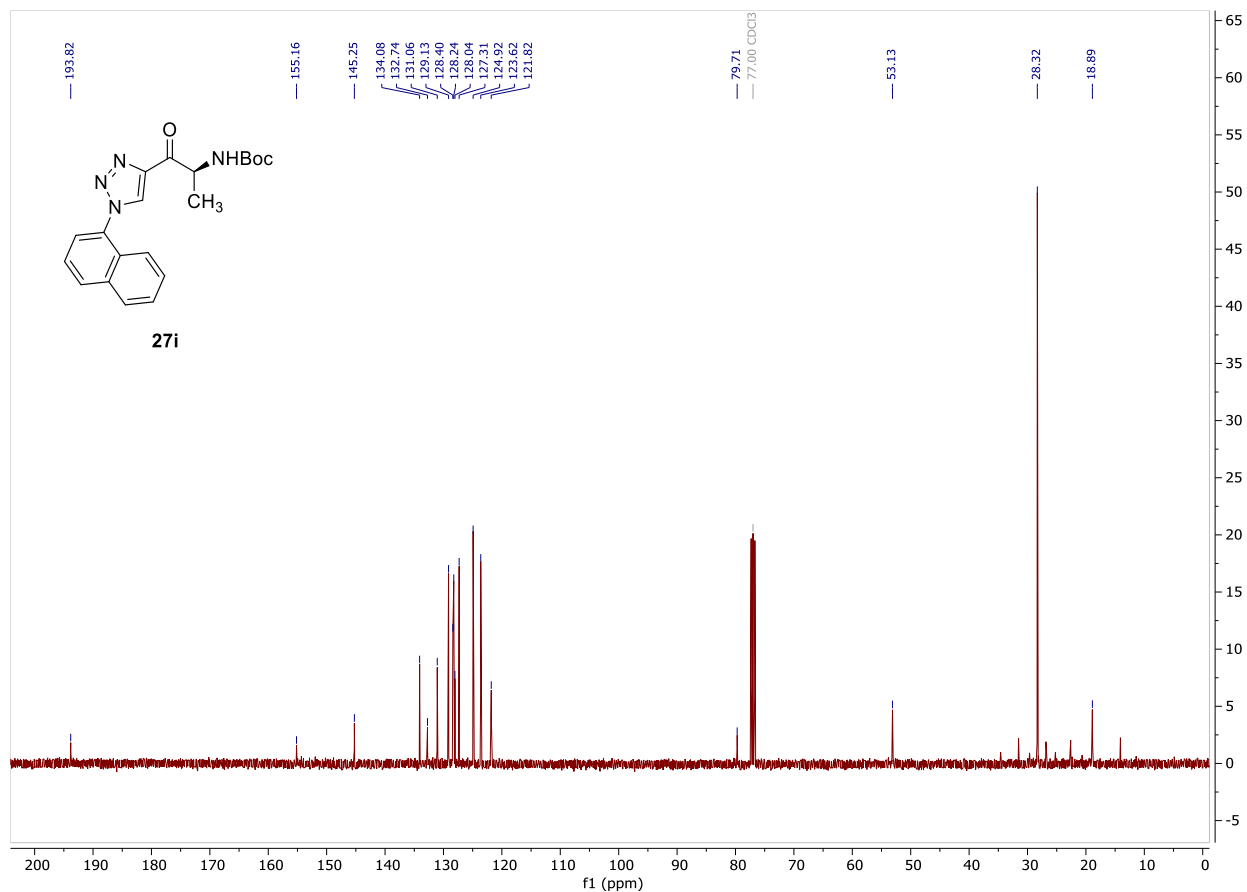

Compound **27j** ( $^1\text{H}$  NMR, 400 MHz):

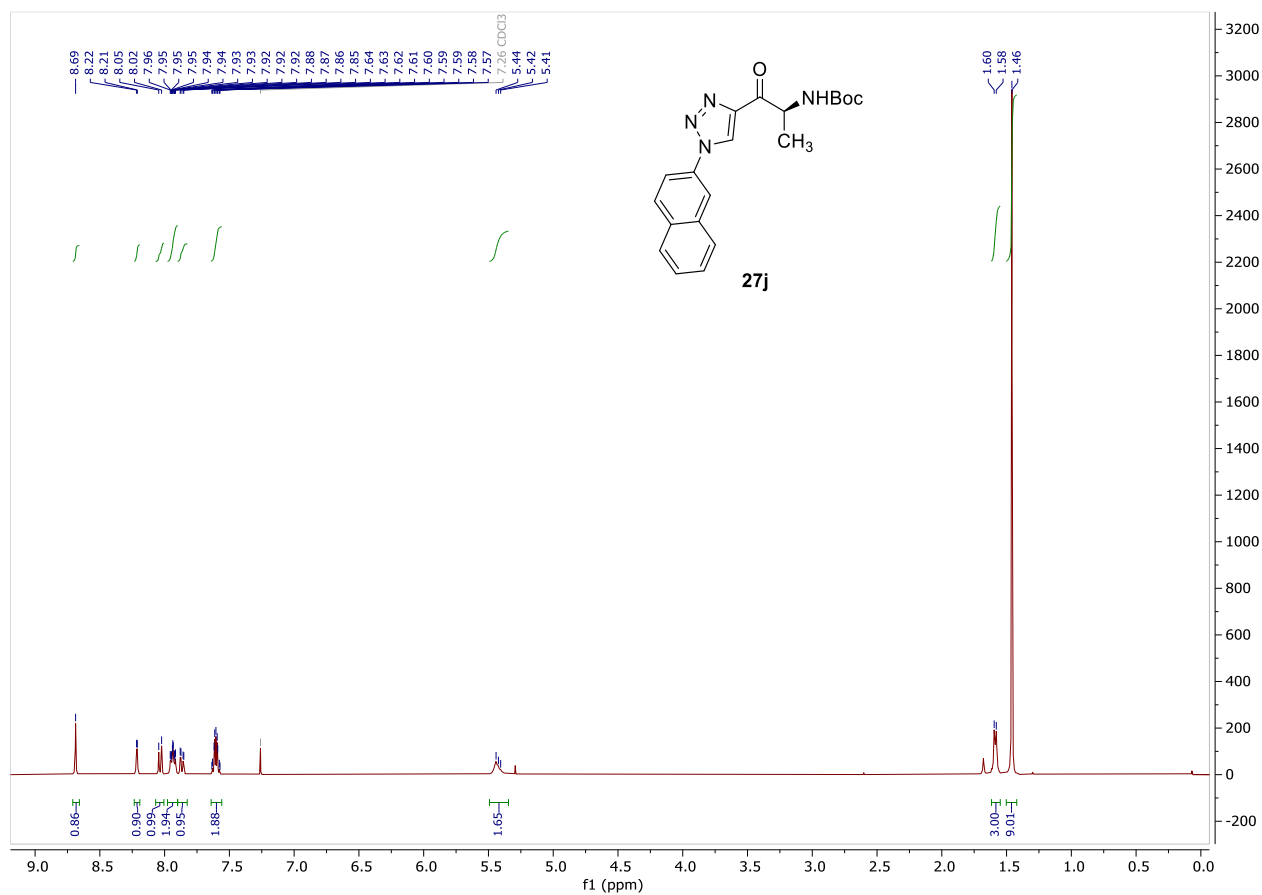

Compound **27j** ( $^{13}\text{C}$  NMR, 101 MHz):

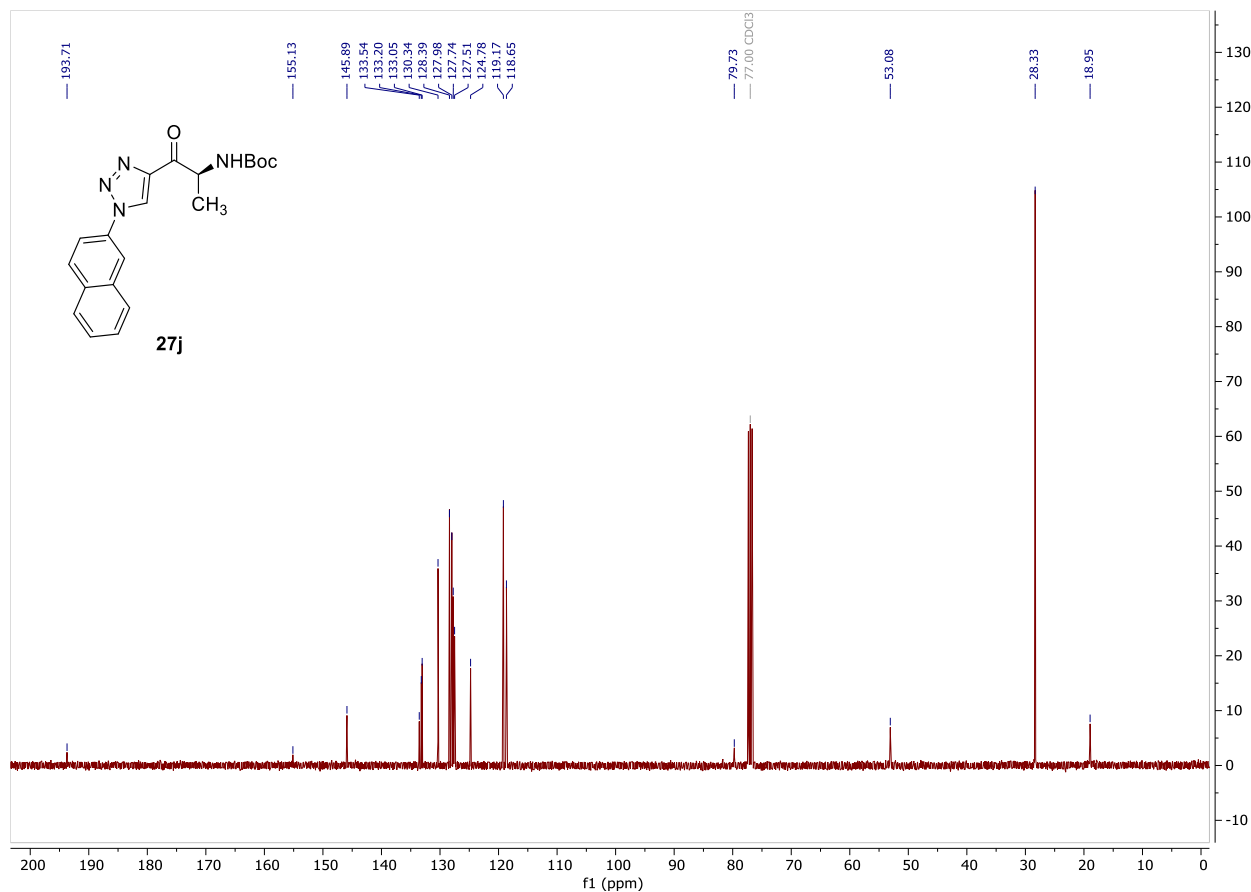

Compound **27k** ( $^1\text{H}$  NMR, 400 MHz):

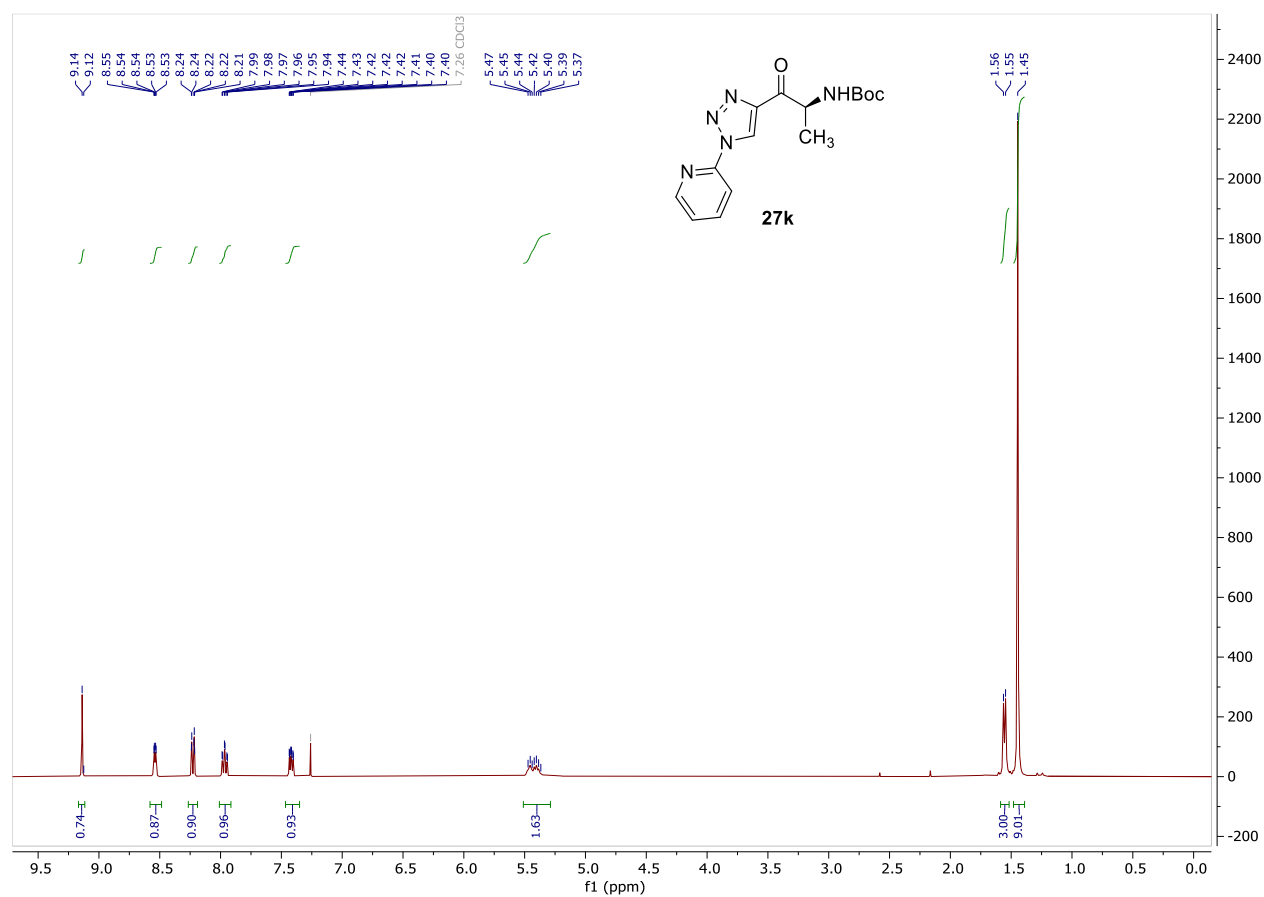

Compound **27k** ( $^{13}\text{C}$  NMR, 101 MHz):

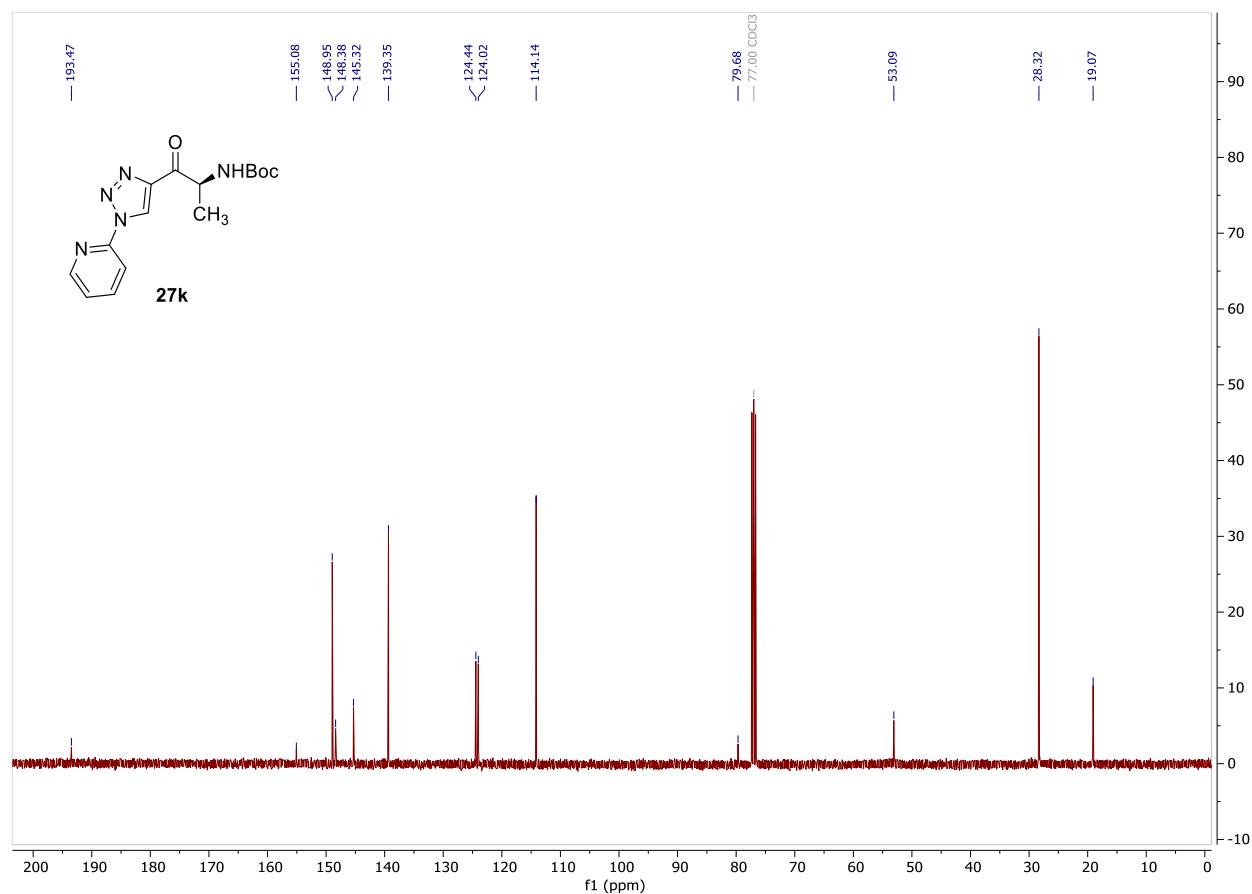

Compound **27I** ( $^1\text{H}$  NMR, 400 MHz):

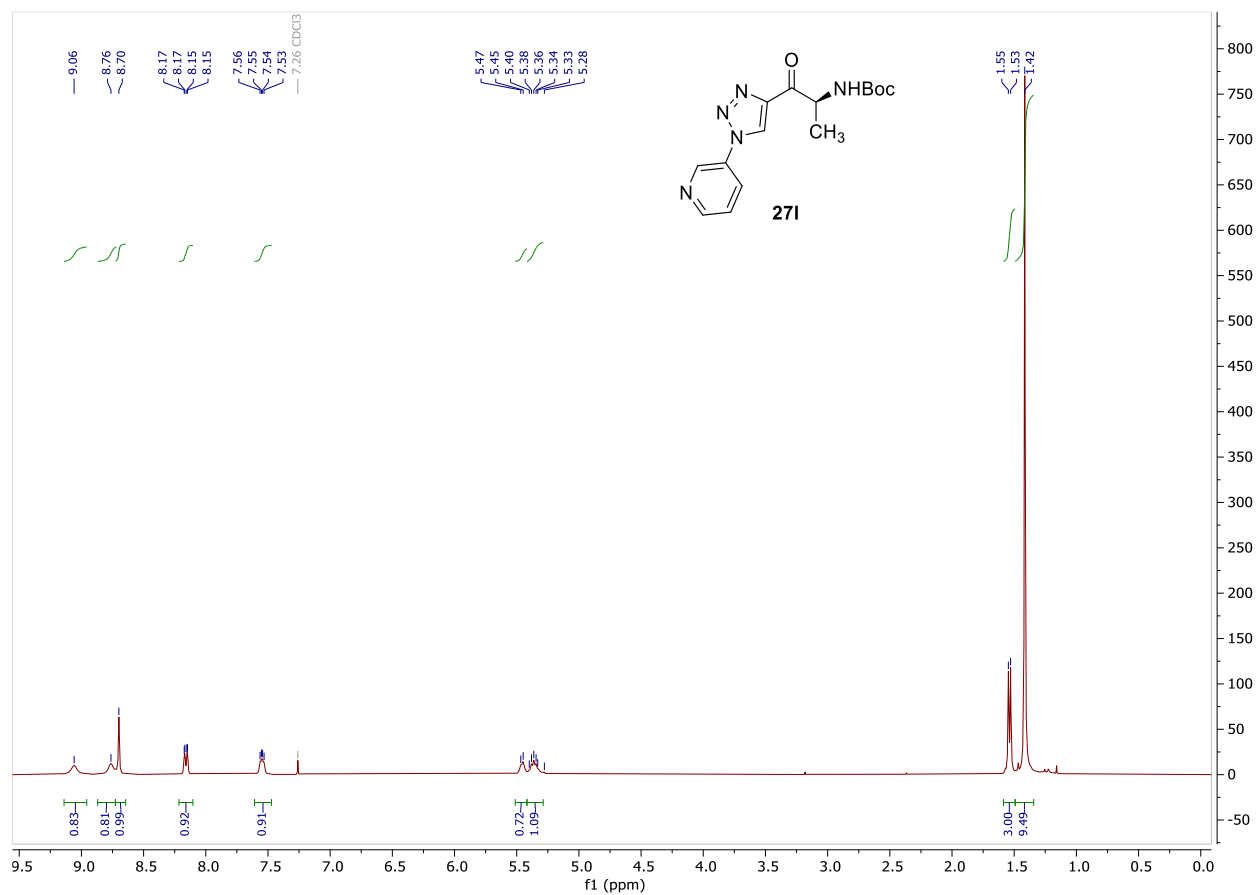

Compound **27I** ( $^{13}\text{C}$  NMR, 101 MHz):

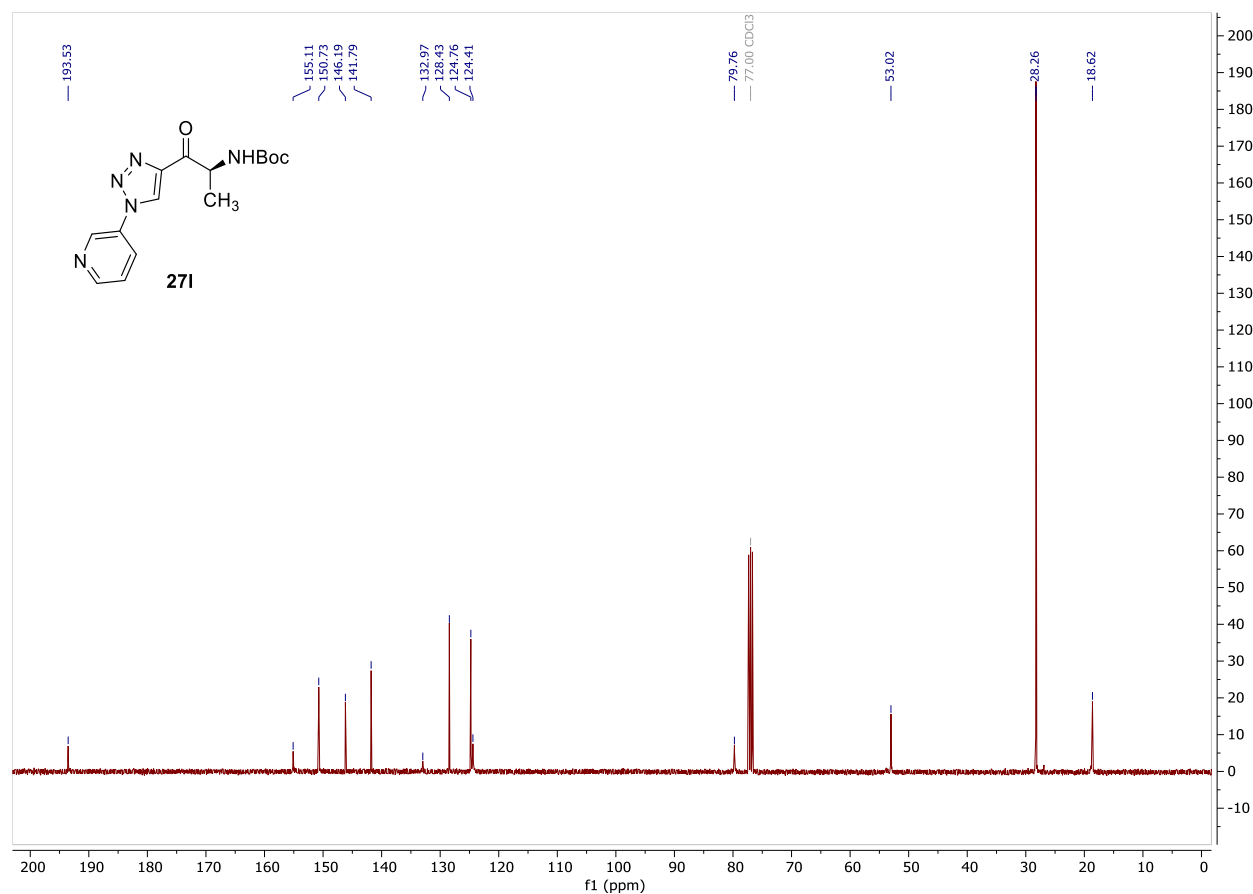

Compound **27m** ( $^1\text{H}$  NMR, 400 MHz):

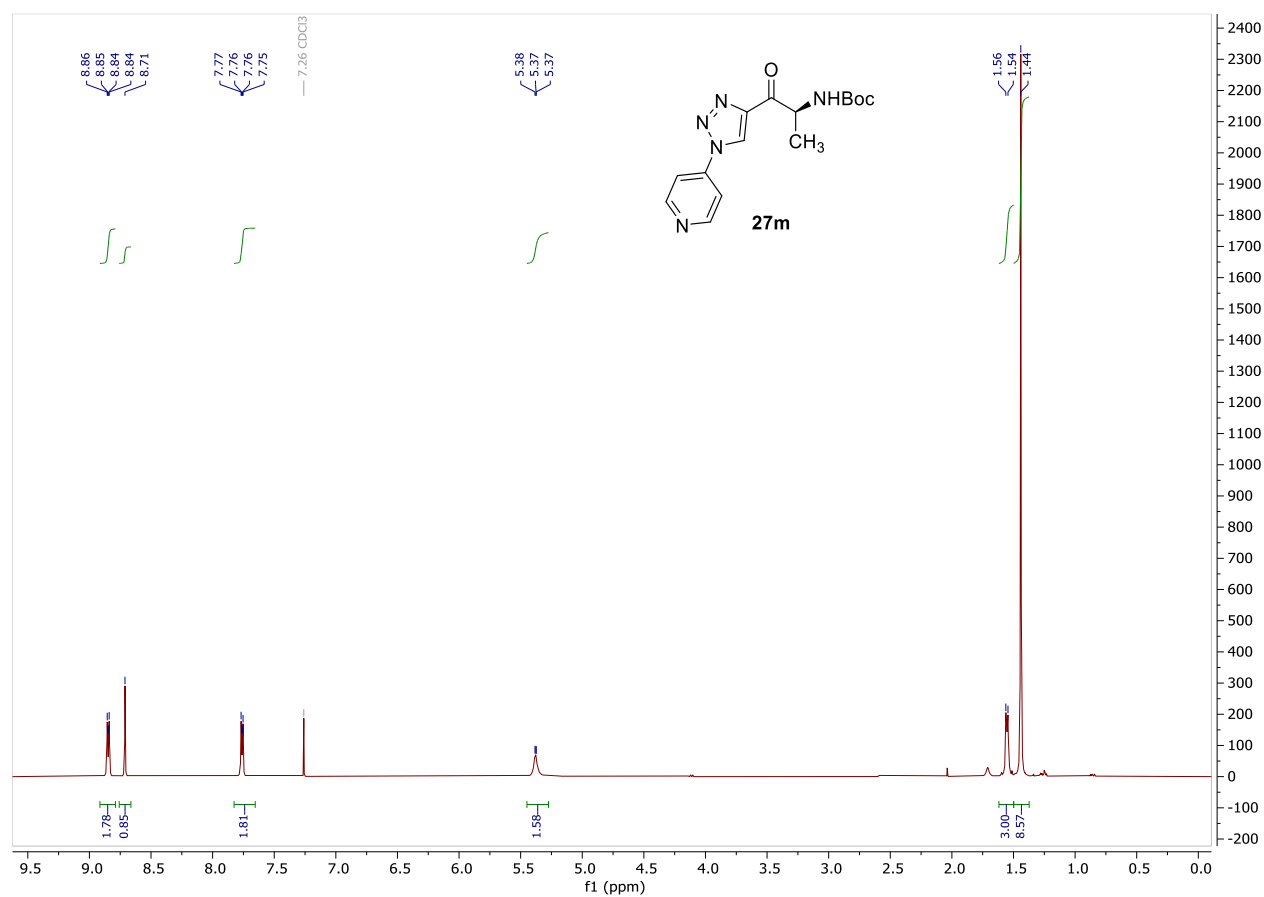

Compound **27m** ( $^{13}\text{C}$  NMR, 101 MHz):

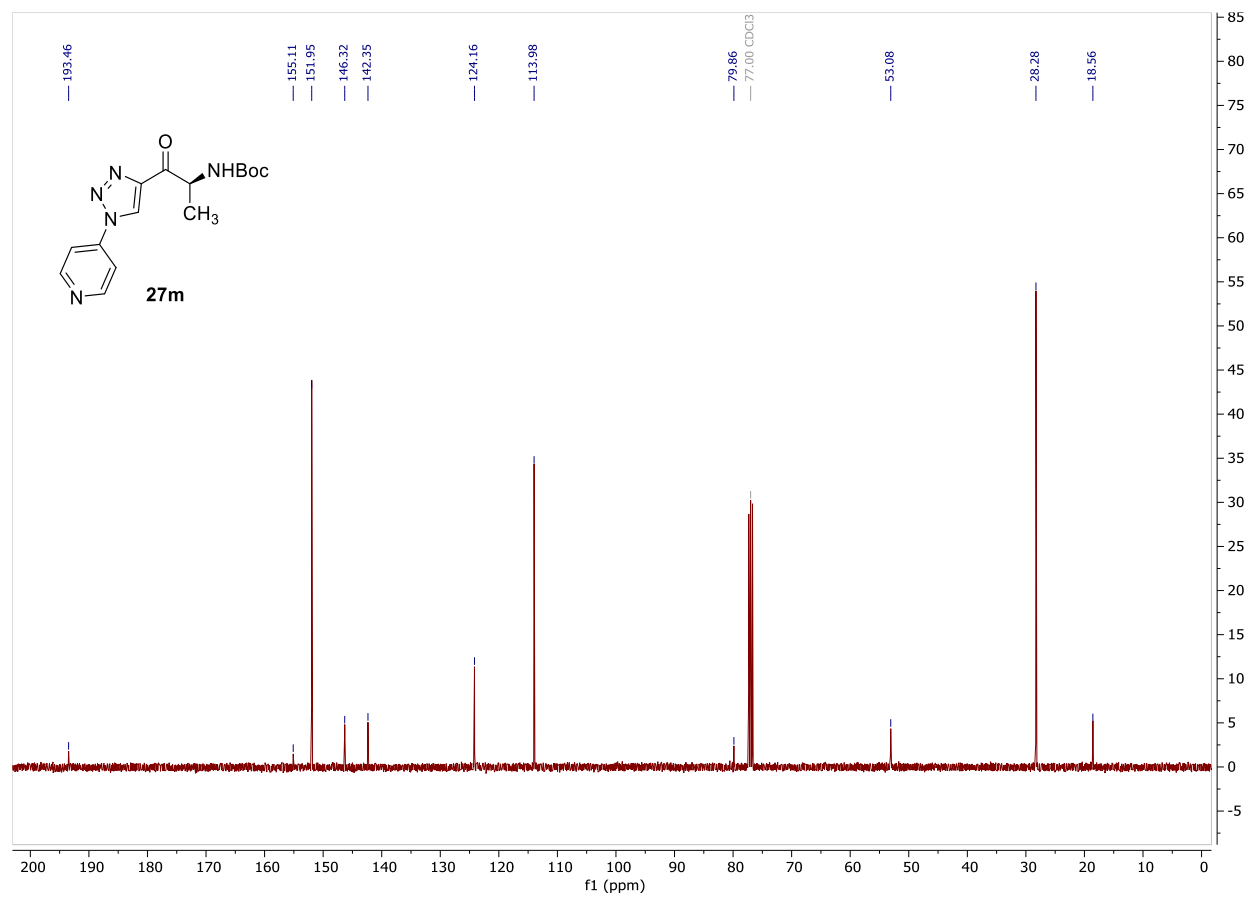

Compound **27n** ( $^1\text{H}$  NMR, 400 MHz):

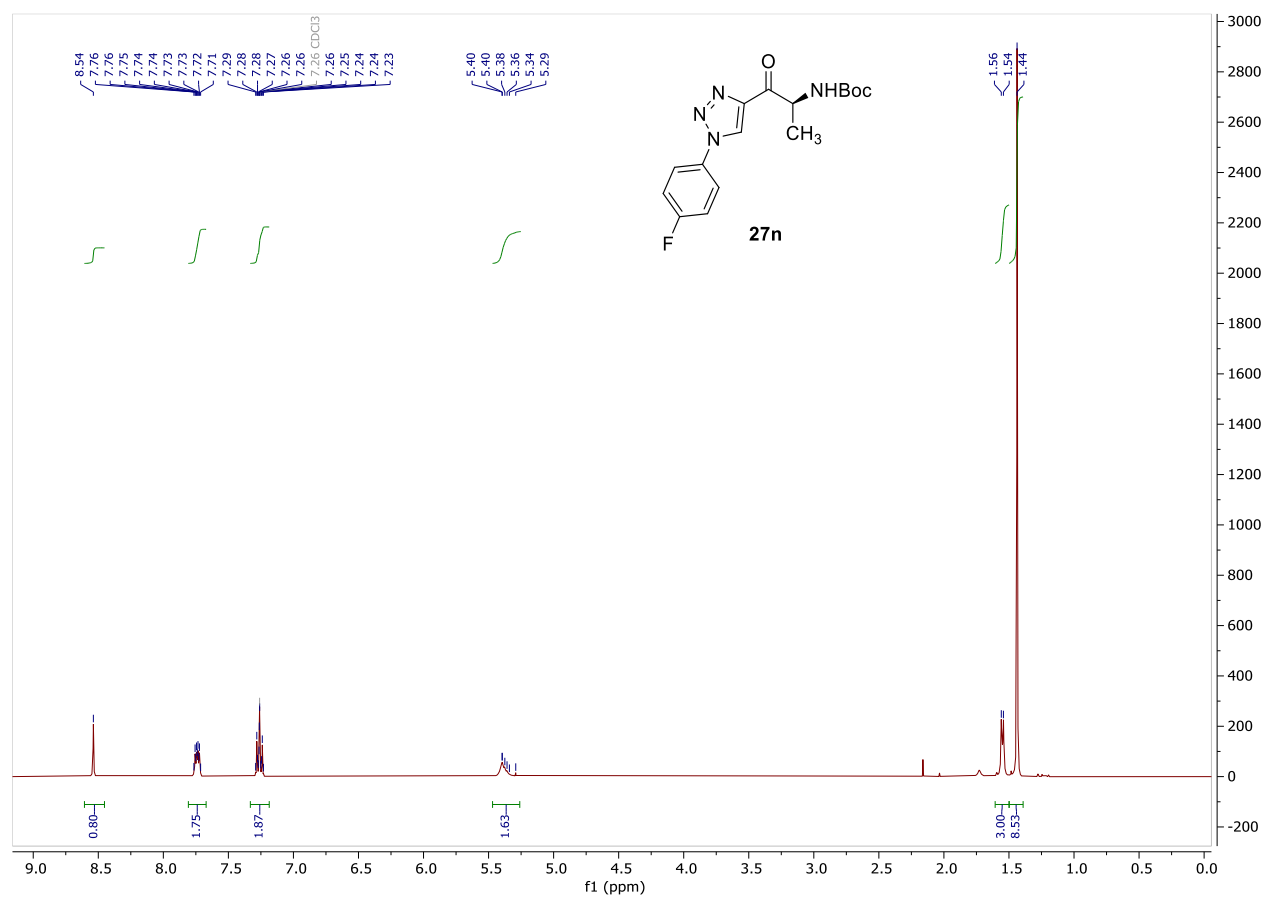



Compound **27n** ( $^{19}\text{F}$  NMR, 282 MHz):

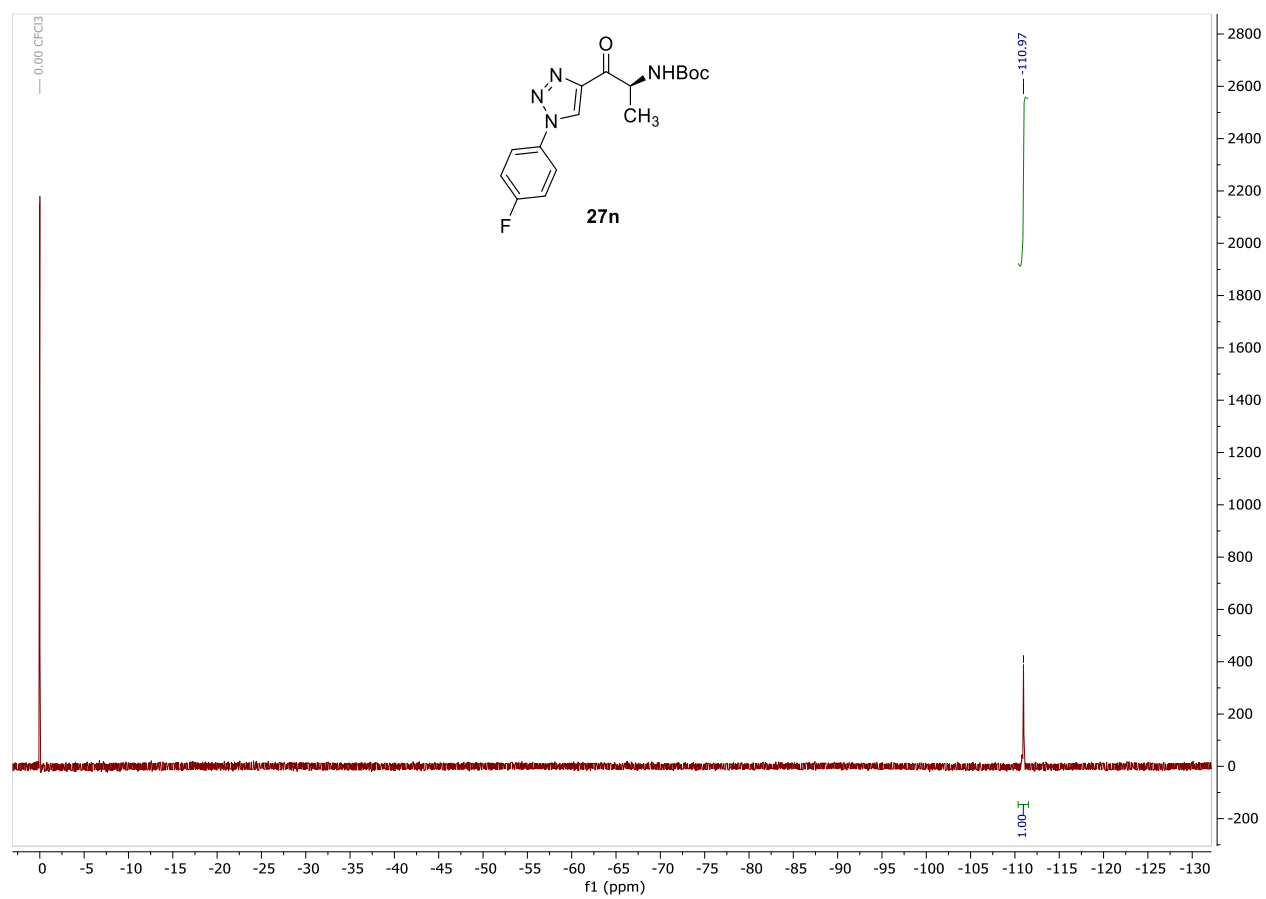

Compound **27o** ( $^1\text{H}$  NMR, 400 MHz):

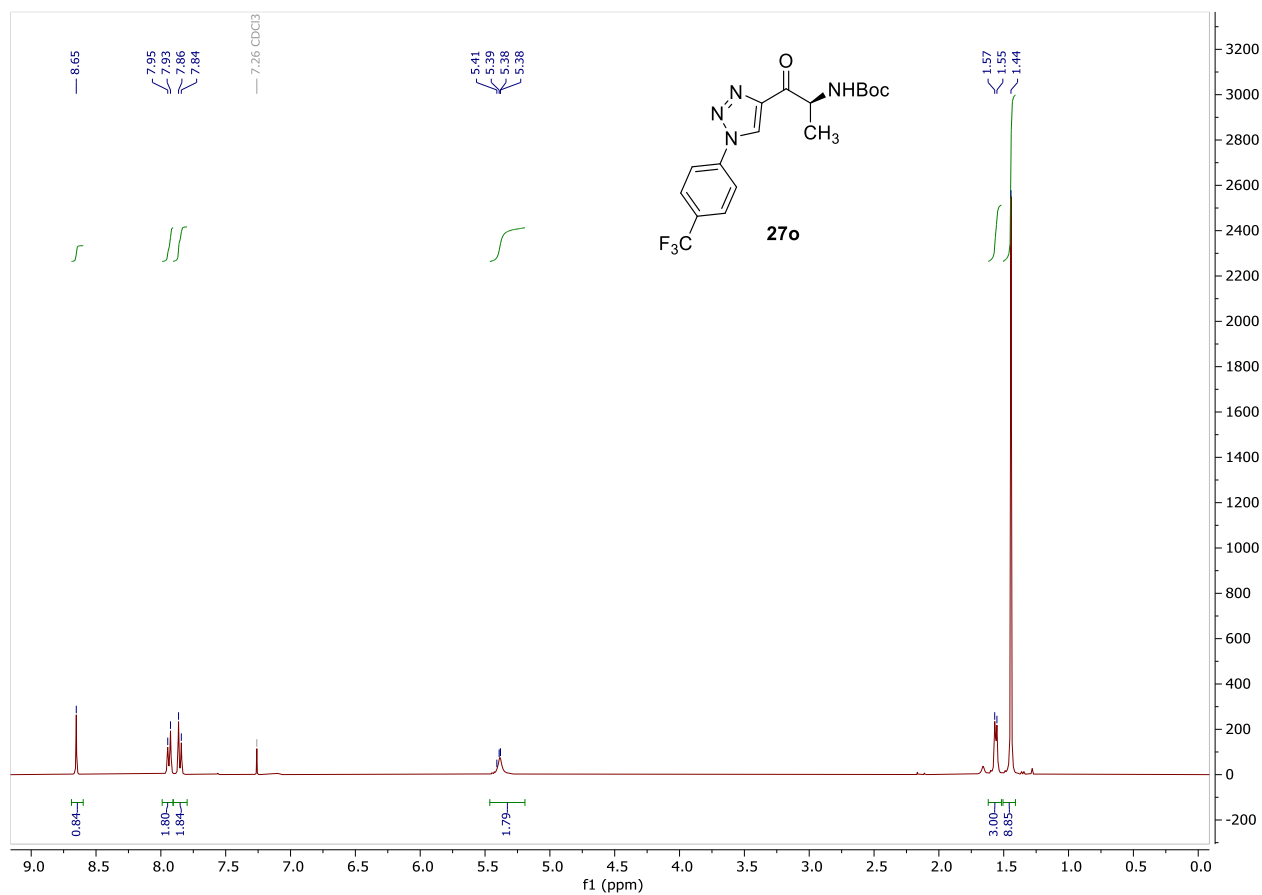

Compound **27o** ( $^{13}\text{C}$  NMR, 101 MHz):

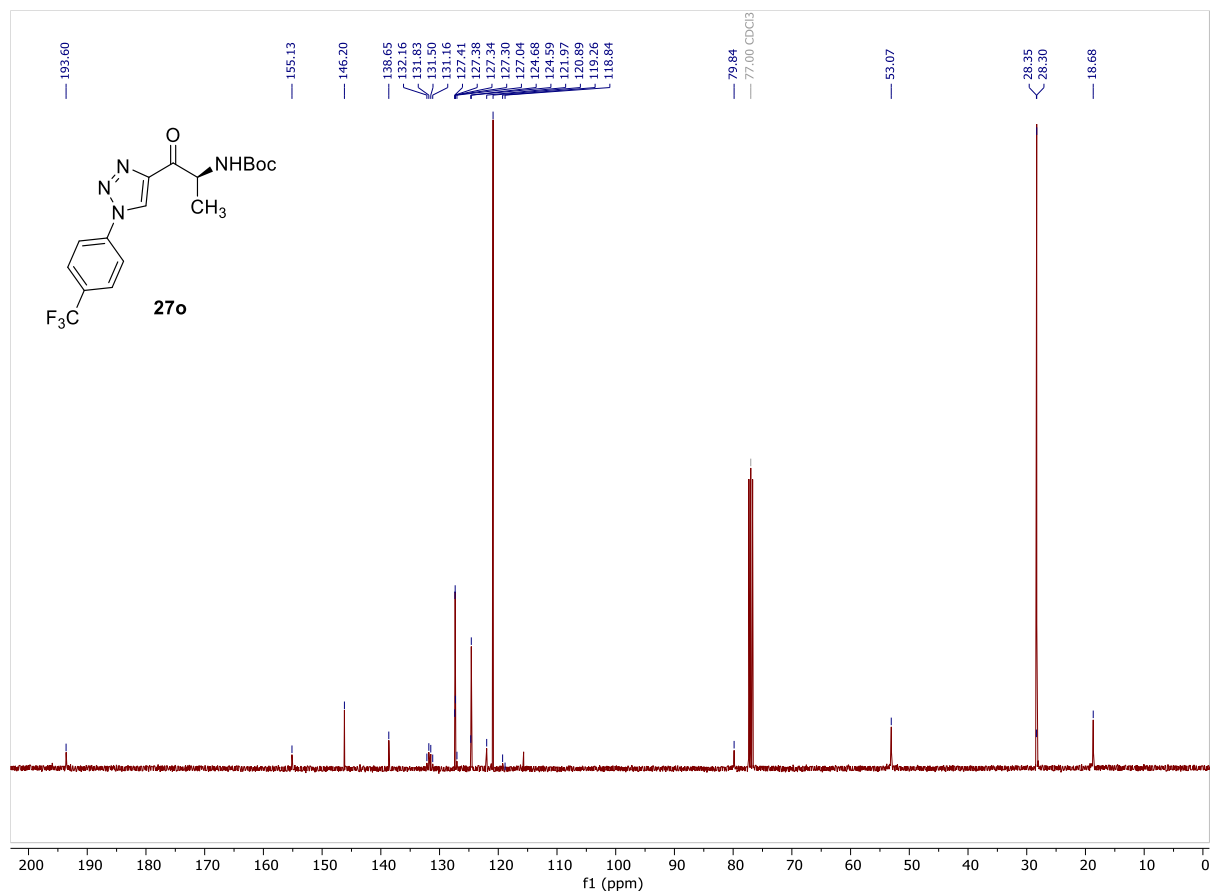

Compound **27o** ( $^{19}\text{F}$  NMR, 282 MHz):

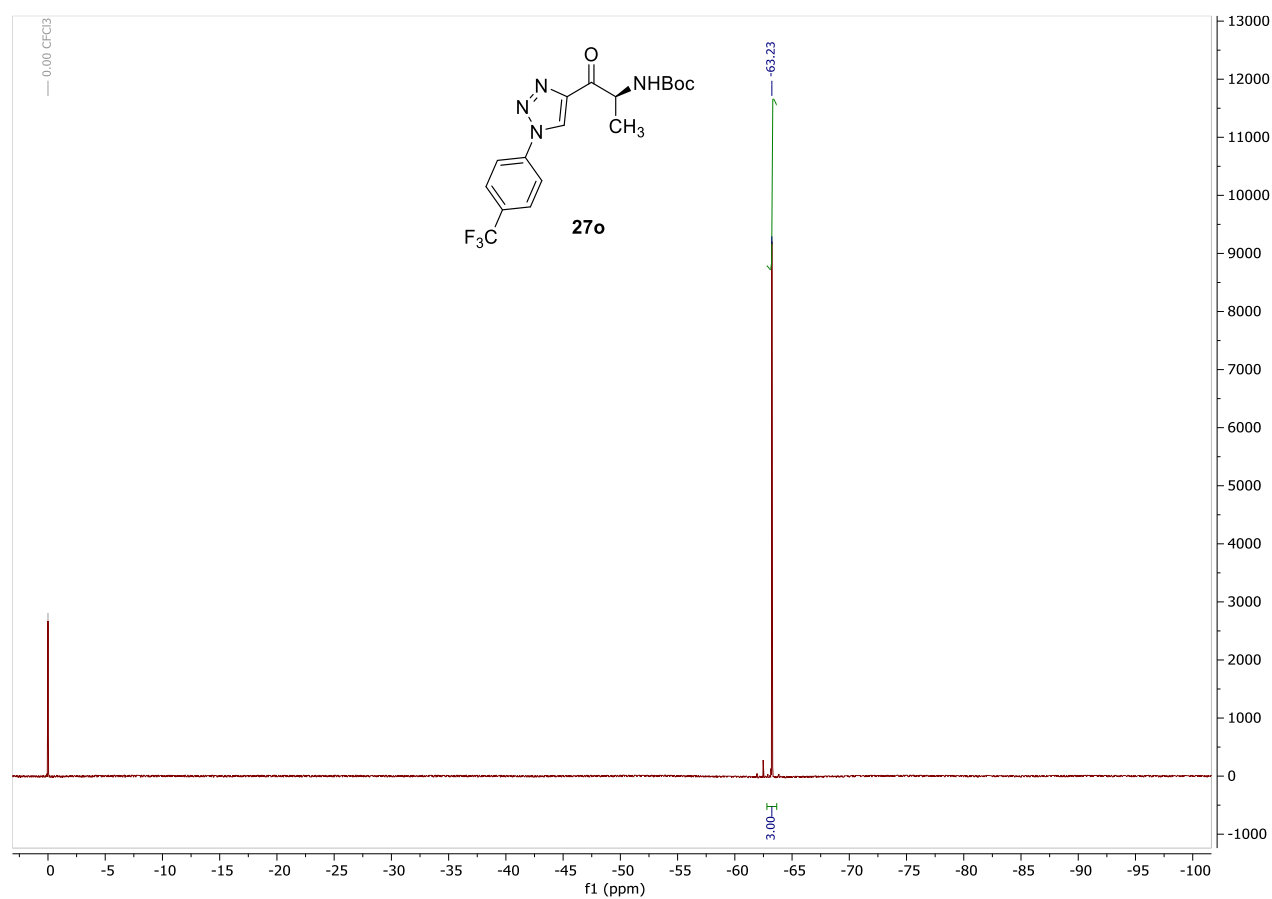

Compound **27p** ( $^1\text{H}$  NMR, 400 MHz):

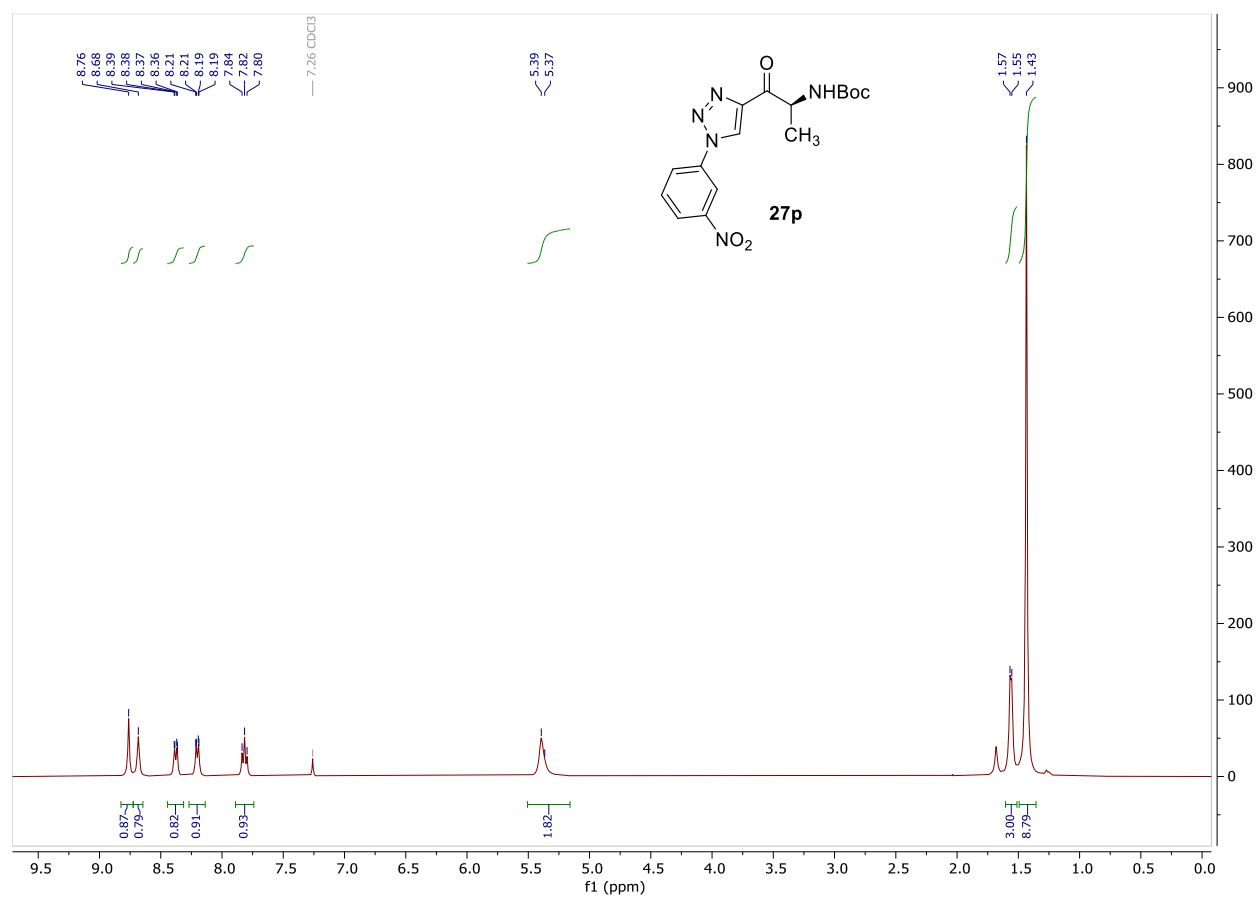

Compound **27p** ( $^{13}\text{C}$  NMR, 101 MHz):

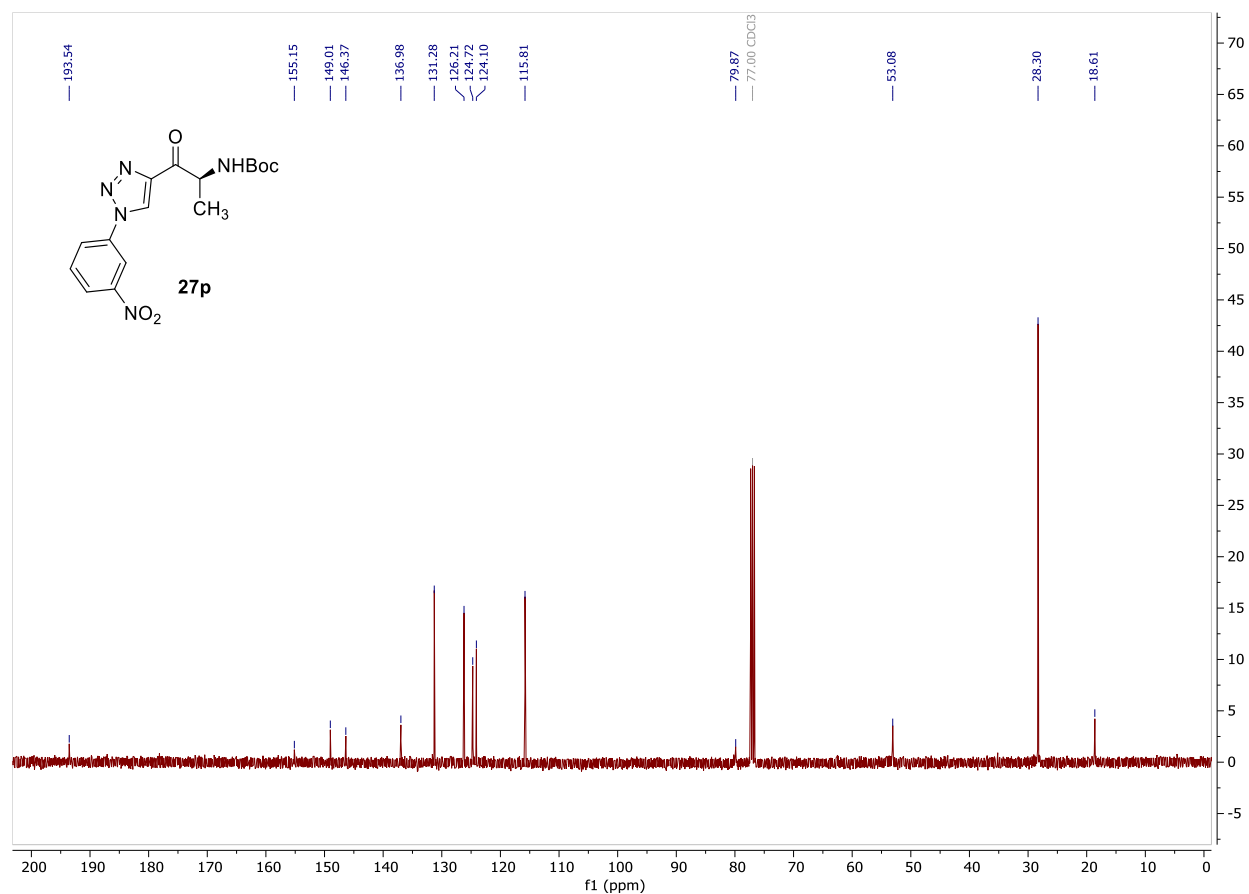

Compound **27q** ( $^1\text{H}$  NMR, 400 MHz):

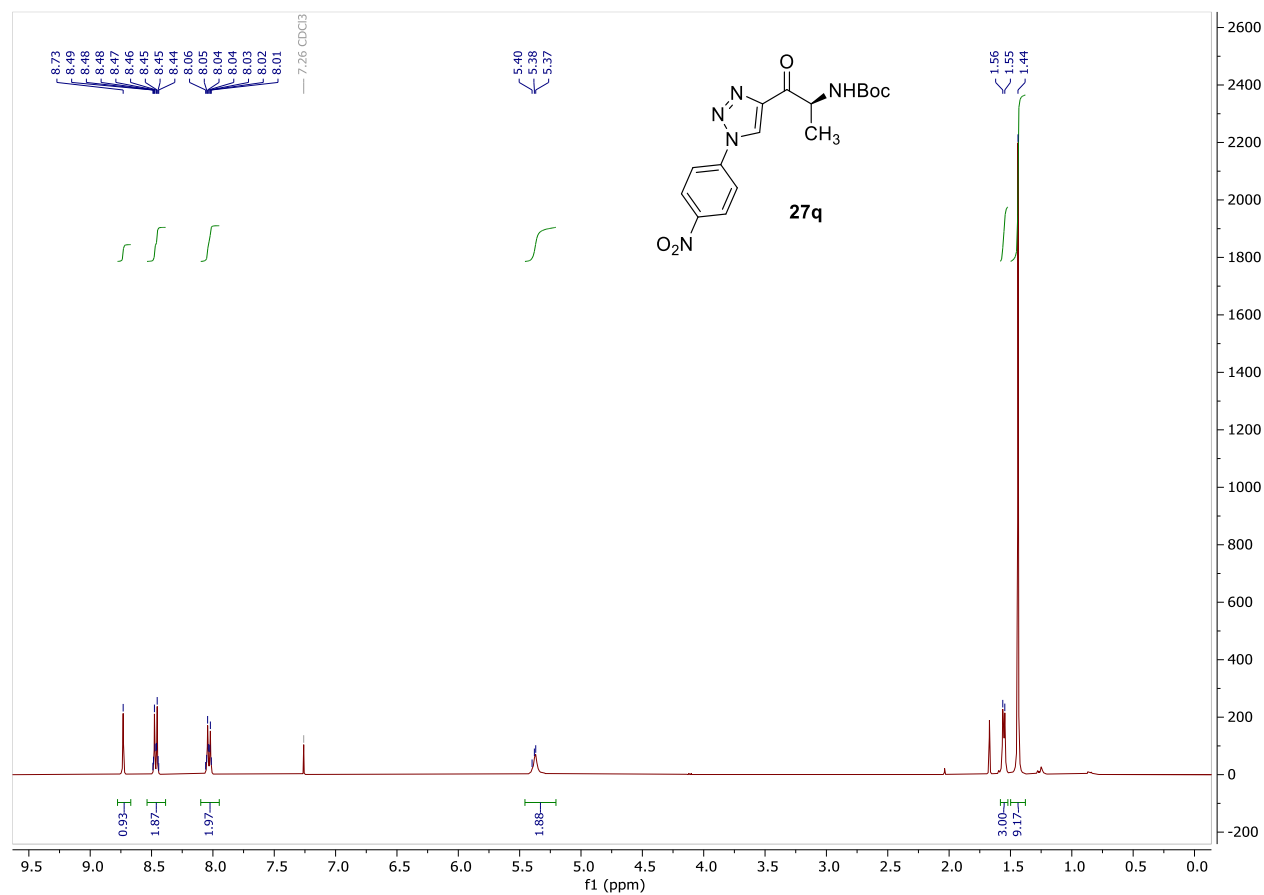

Compound **27q** ( $^{13}\text{C}$  NMR, 101 MHz):

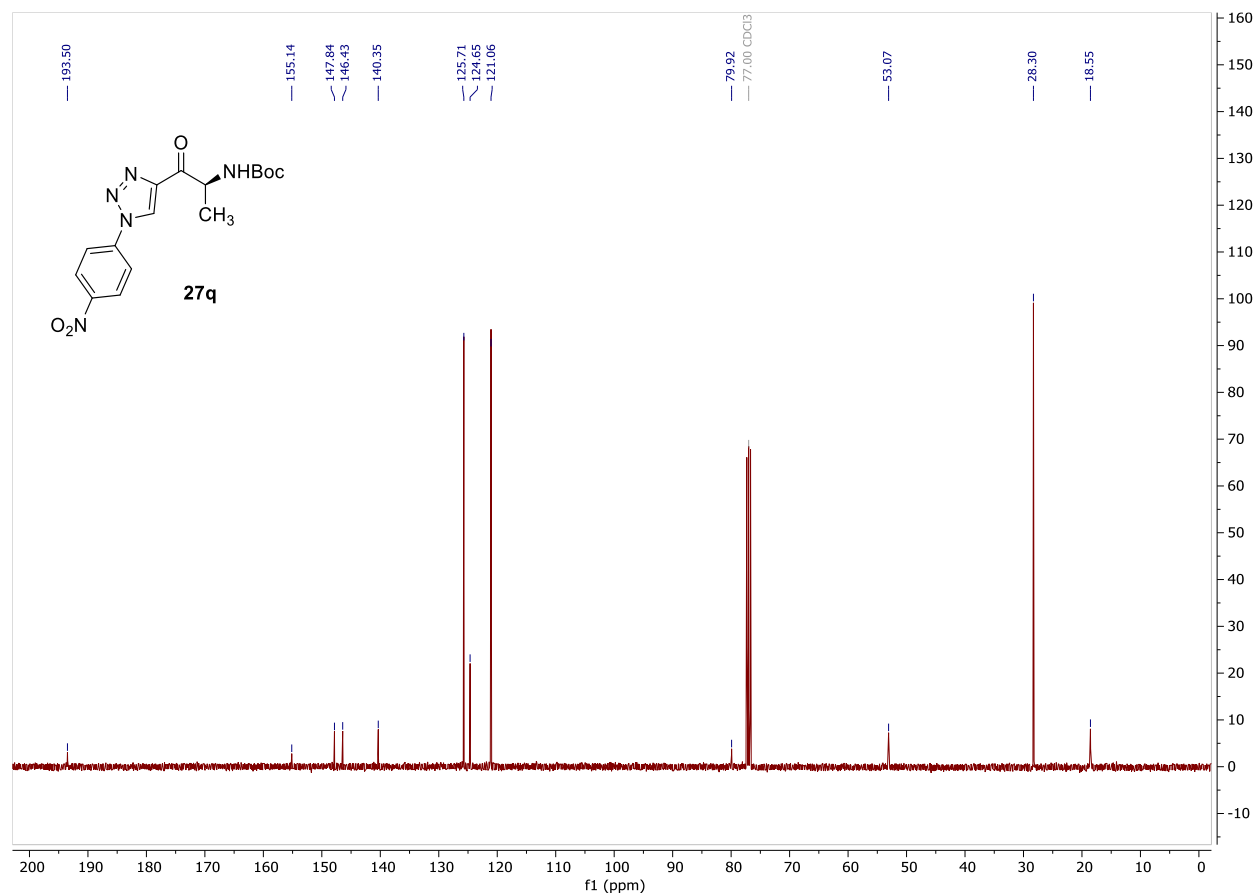

Compound **27r** ( $^1\text{H}$  NMR, 400 MHz):

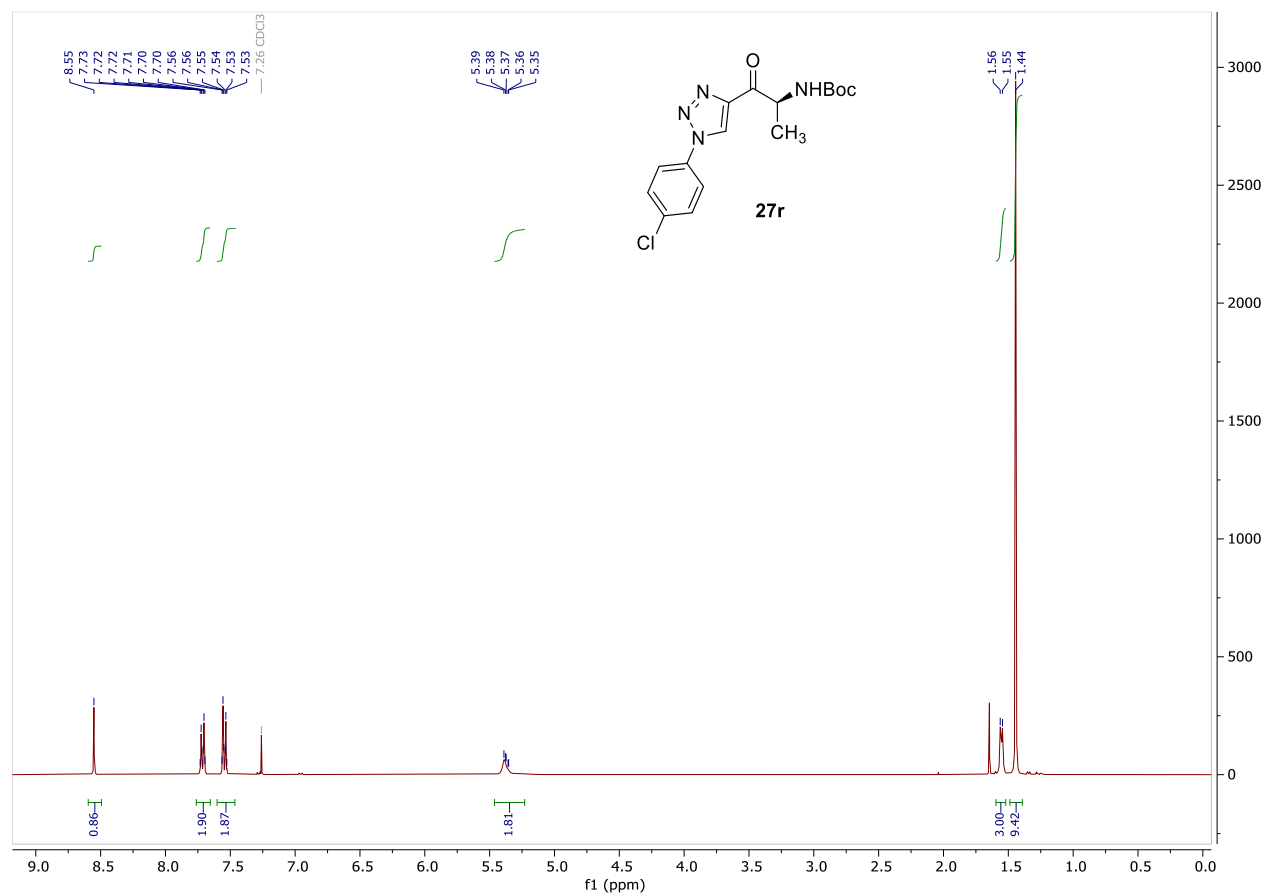

Compound **27r** ( $^{13}\text{C}$  NMR, 101 MHz):

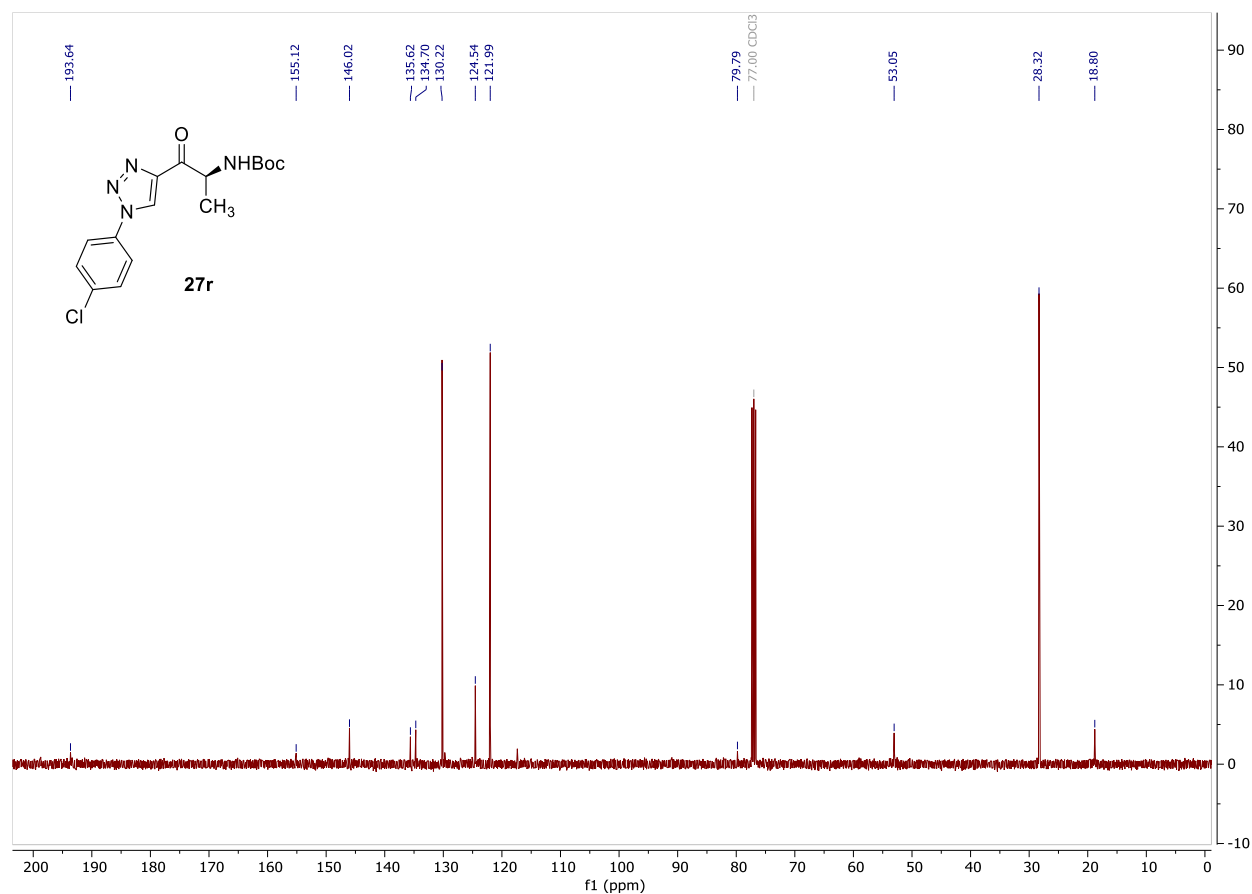

Compound **27s** ( $^1\text{H}$  NMR, 400 MHz):

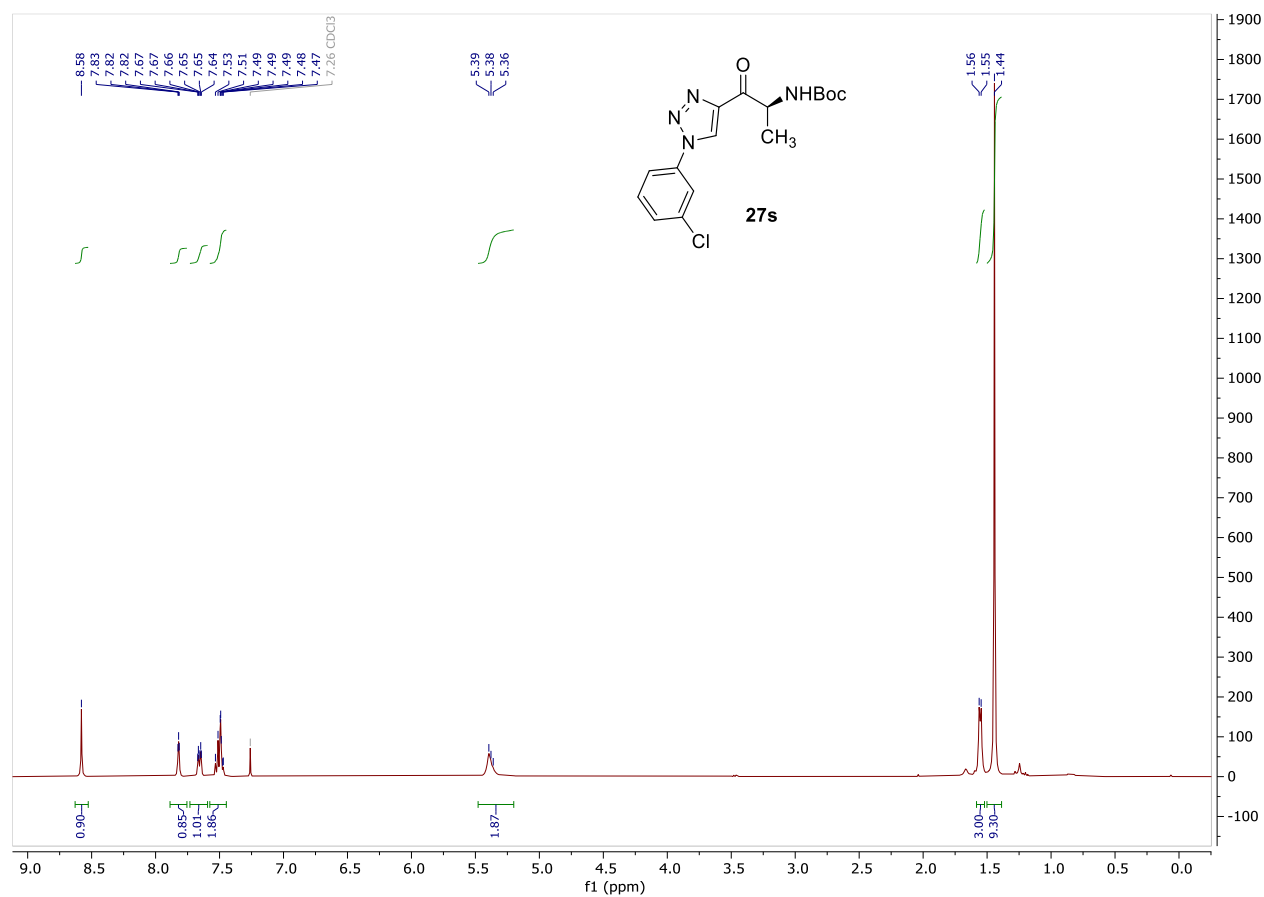

Compound **27s** ( $^{13}\text{C}$  NMR, 101 MHz):

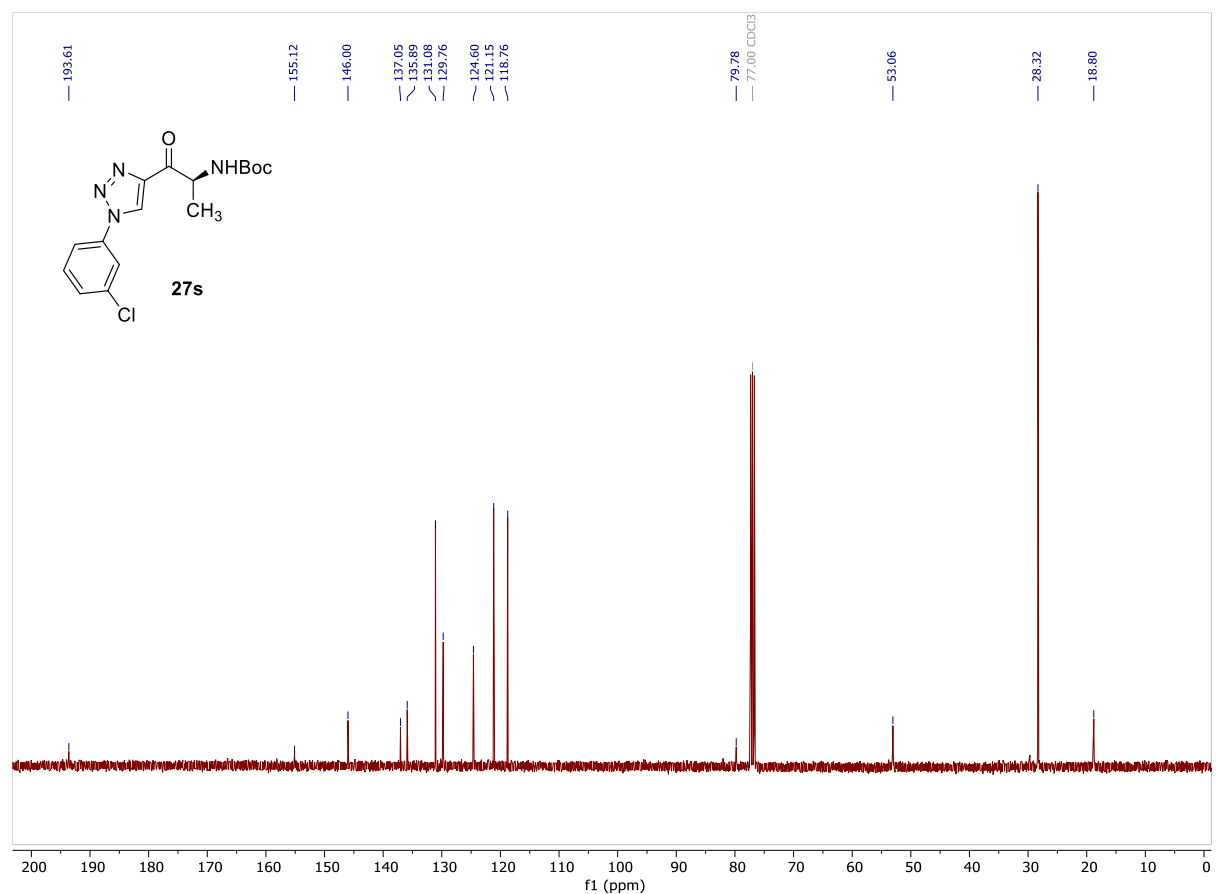

Compound **27t** ( $^1\text{H}$  NMR, 400 MHz):

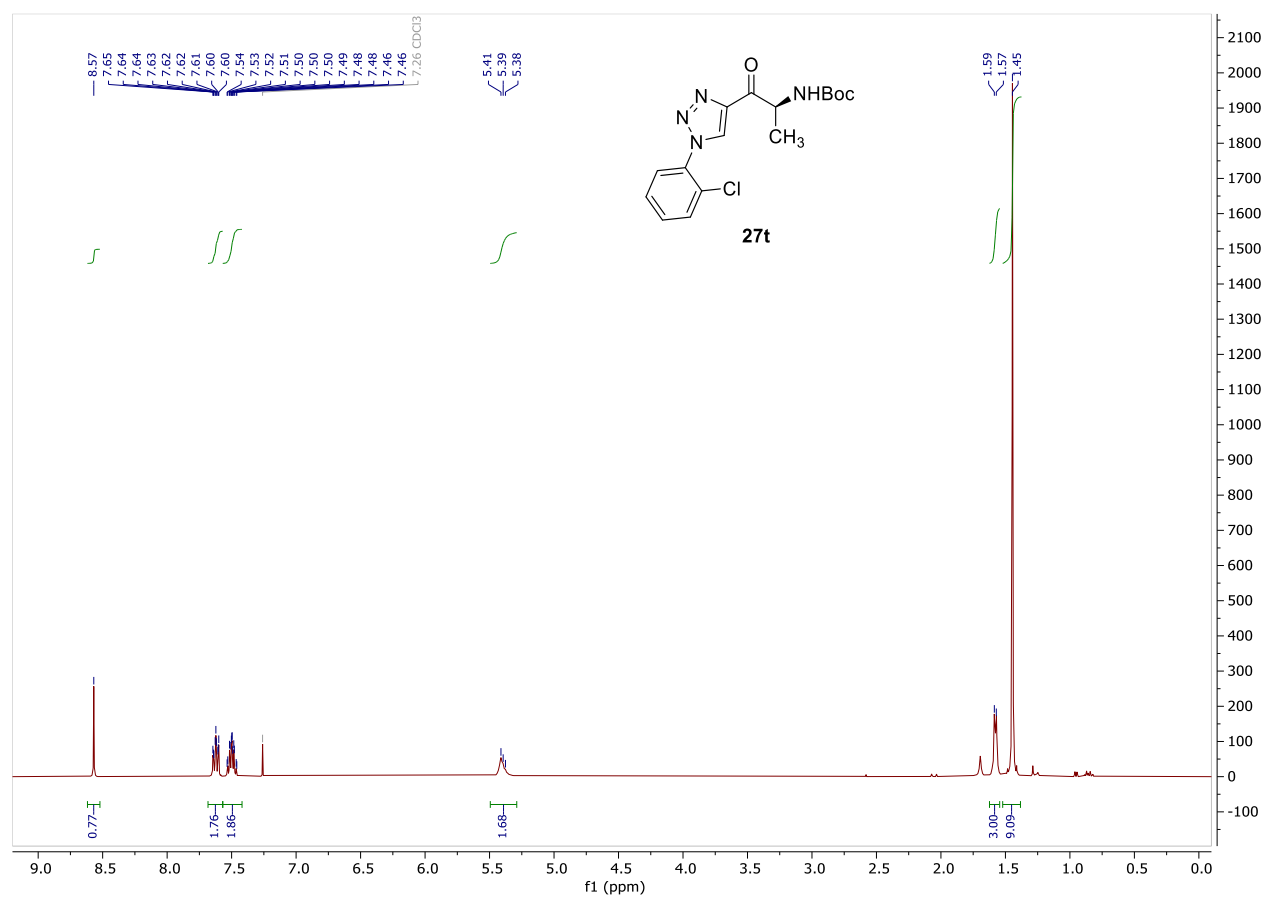

Compound **27t** ( $^{13}\text{C}$  NMR, 101 MHz):

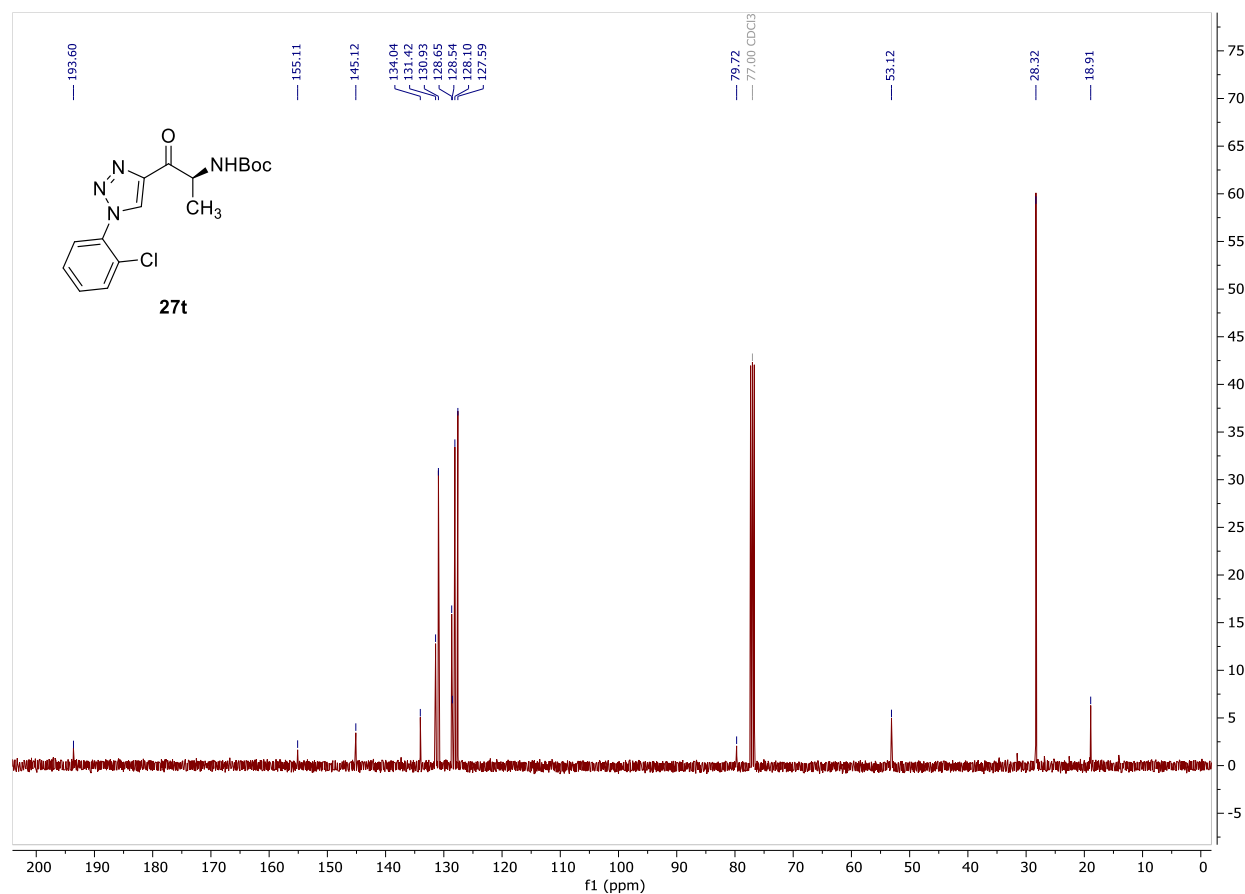



Compound **27u** ( $^1\text{H}$  NMR, 400 MHz):

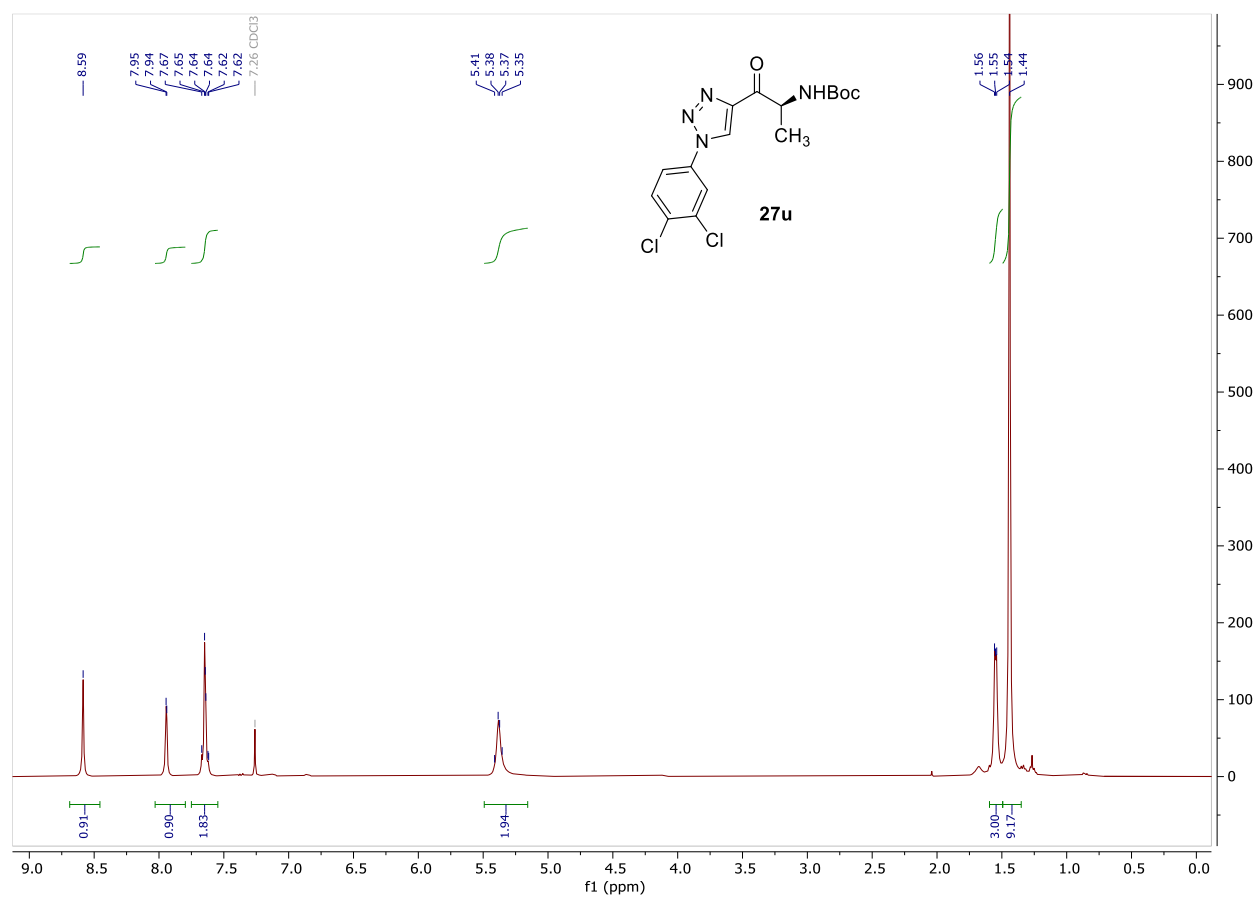

Compound **27u** ( $^{13}\text{C}$  NMR, 101 MHz):

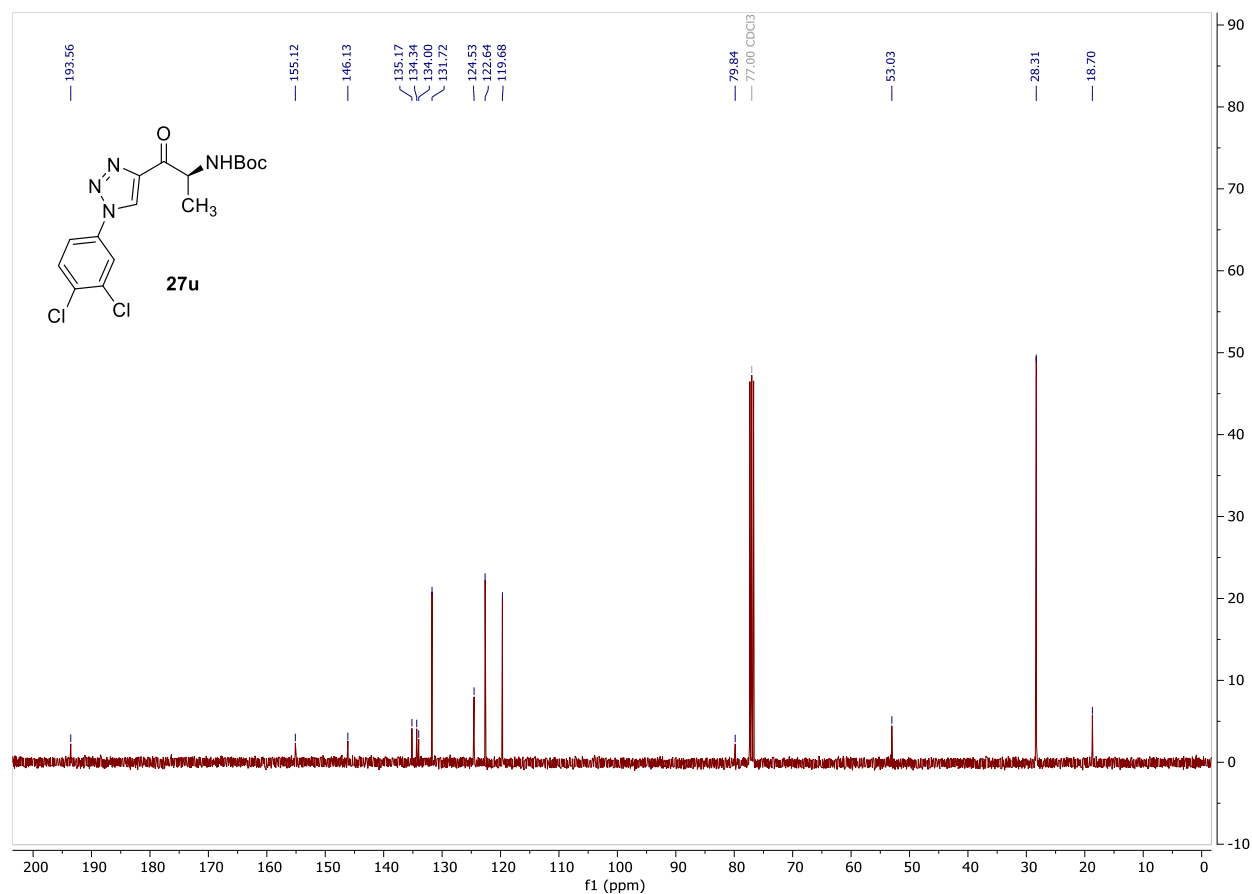

Compound **27v** ( $^1\text{H}$  NMR, 400 MHz):

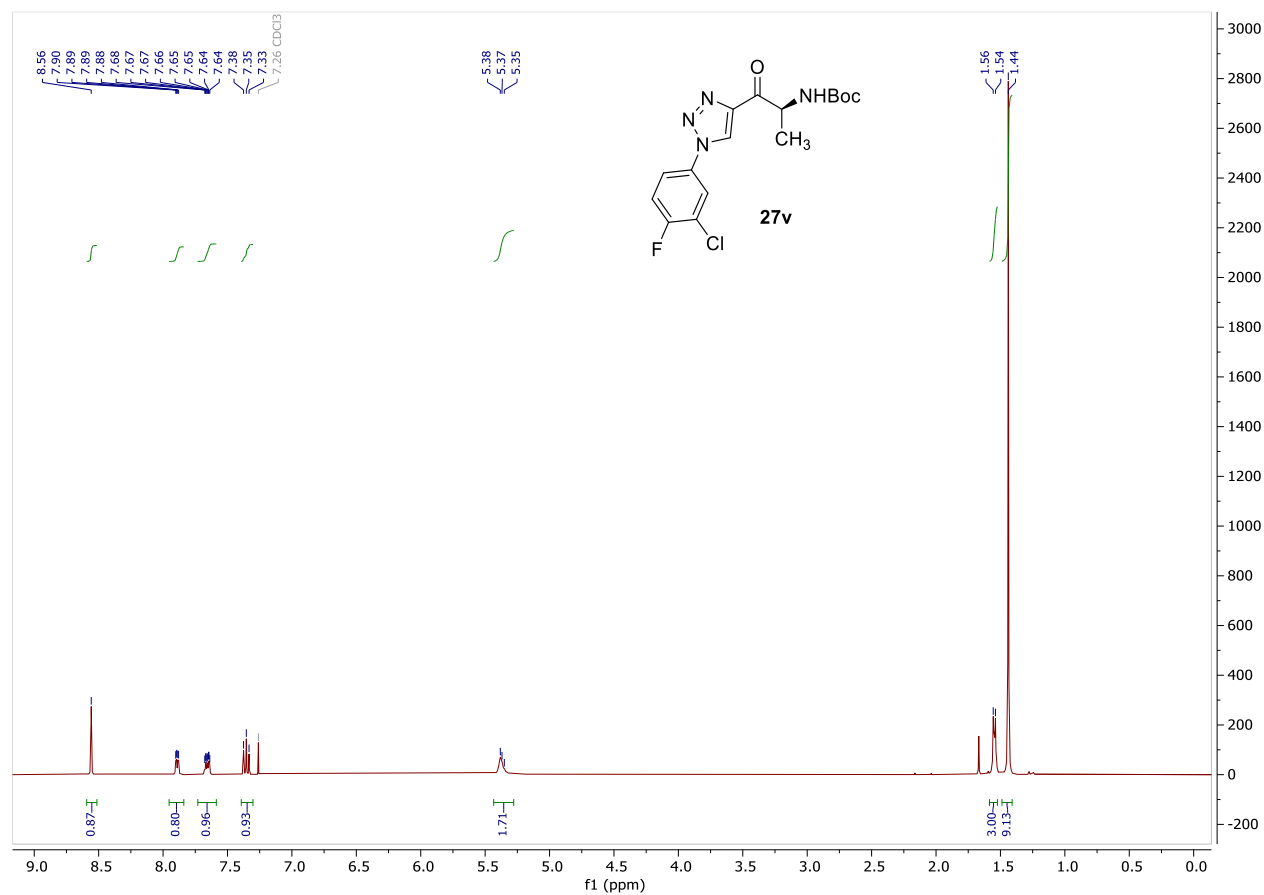

Compound **27v** ( $^{13}\text{C}$  NMR, 101 MHz):

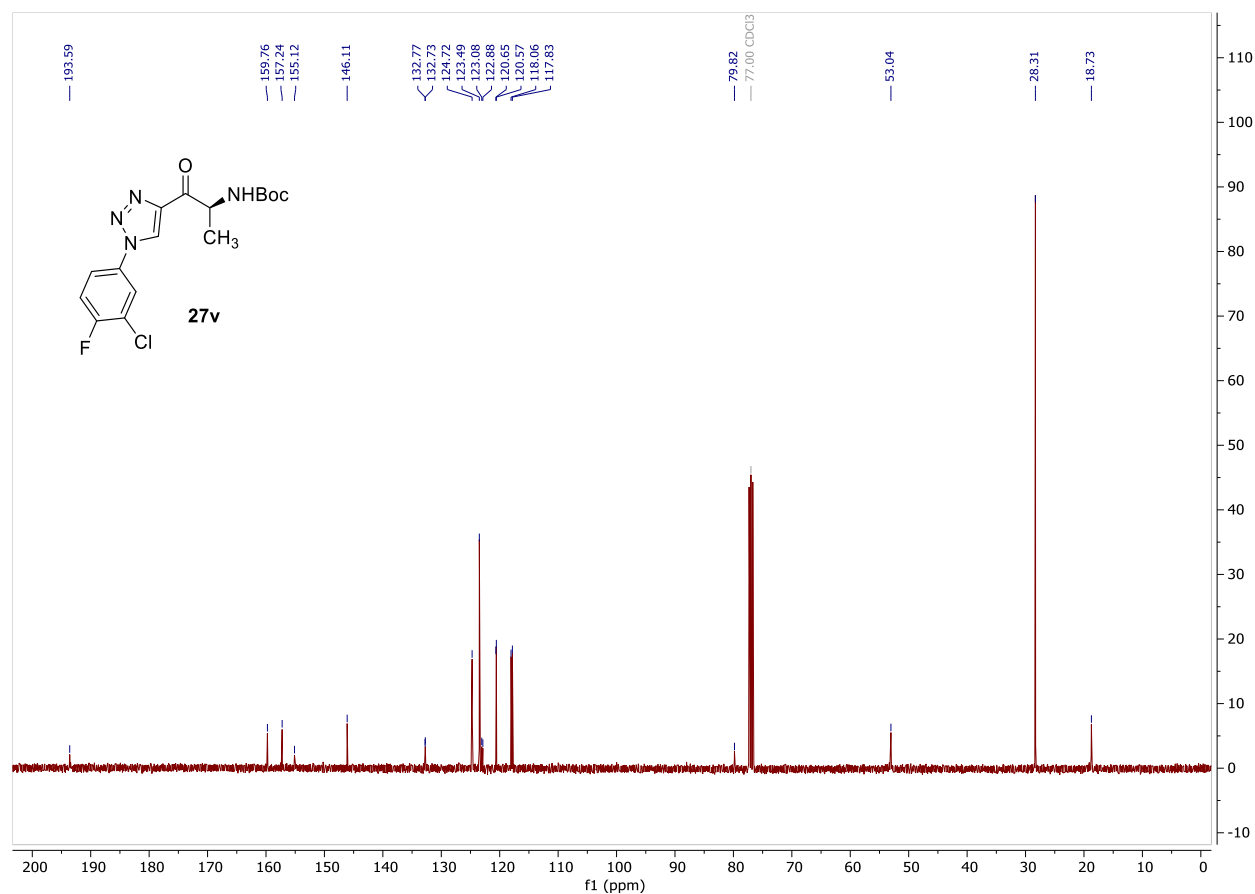

Compound **27v** ( $^{19}\text{F}$  NMR, 282 MHz):

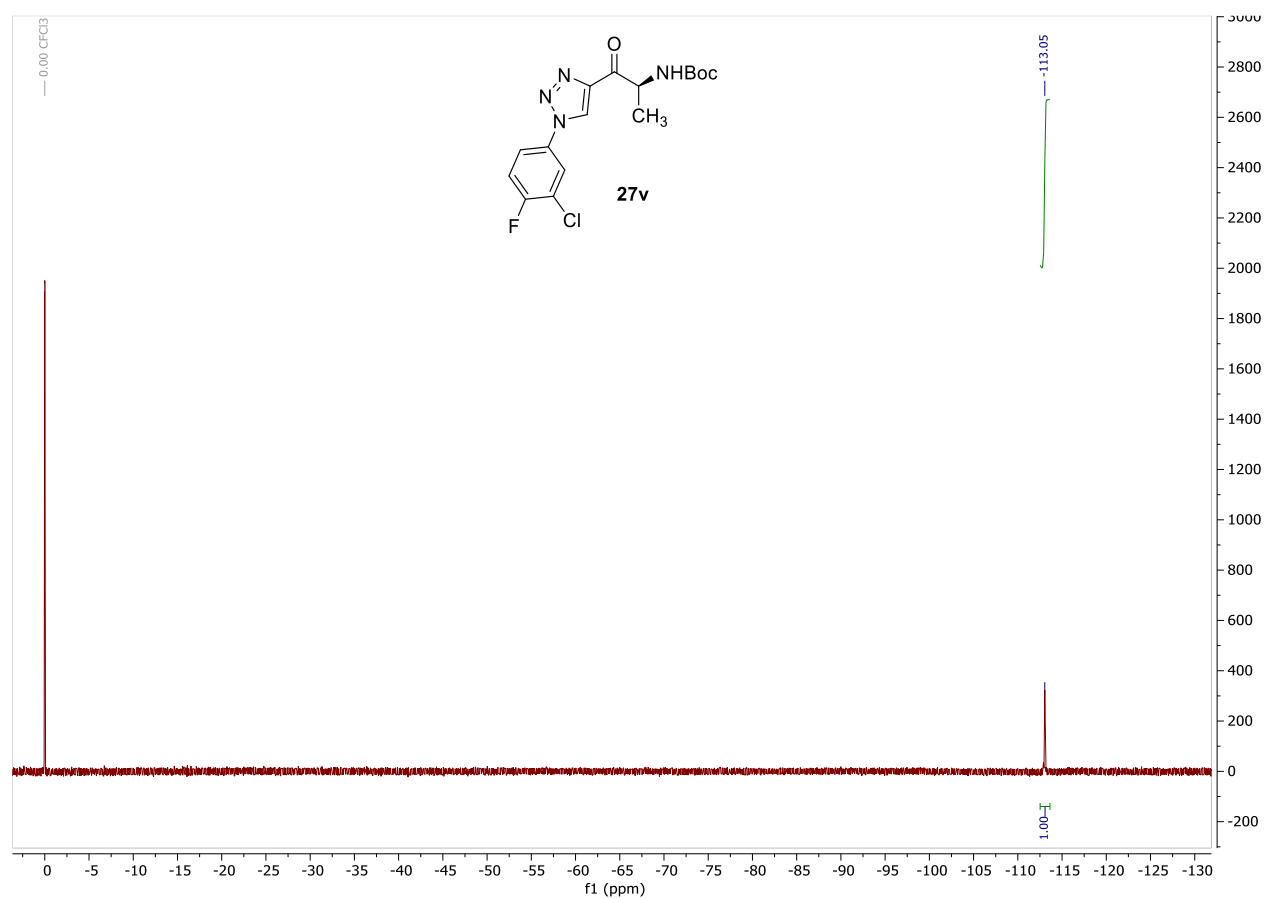

Compound **35a** ( $^1\text{H}$  NMR, 400 MHz):

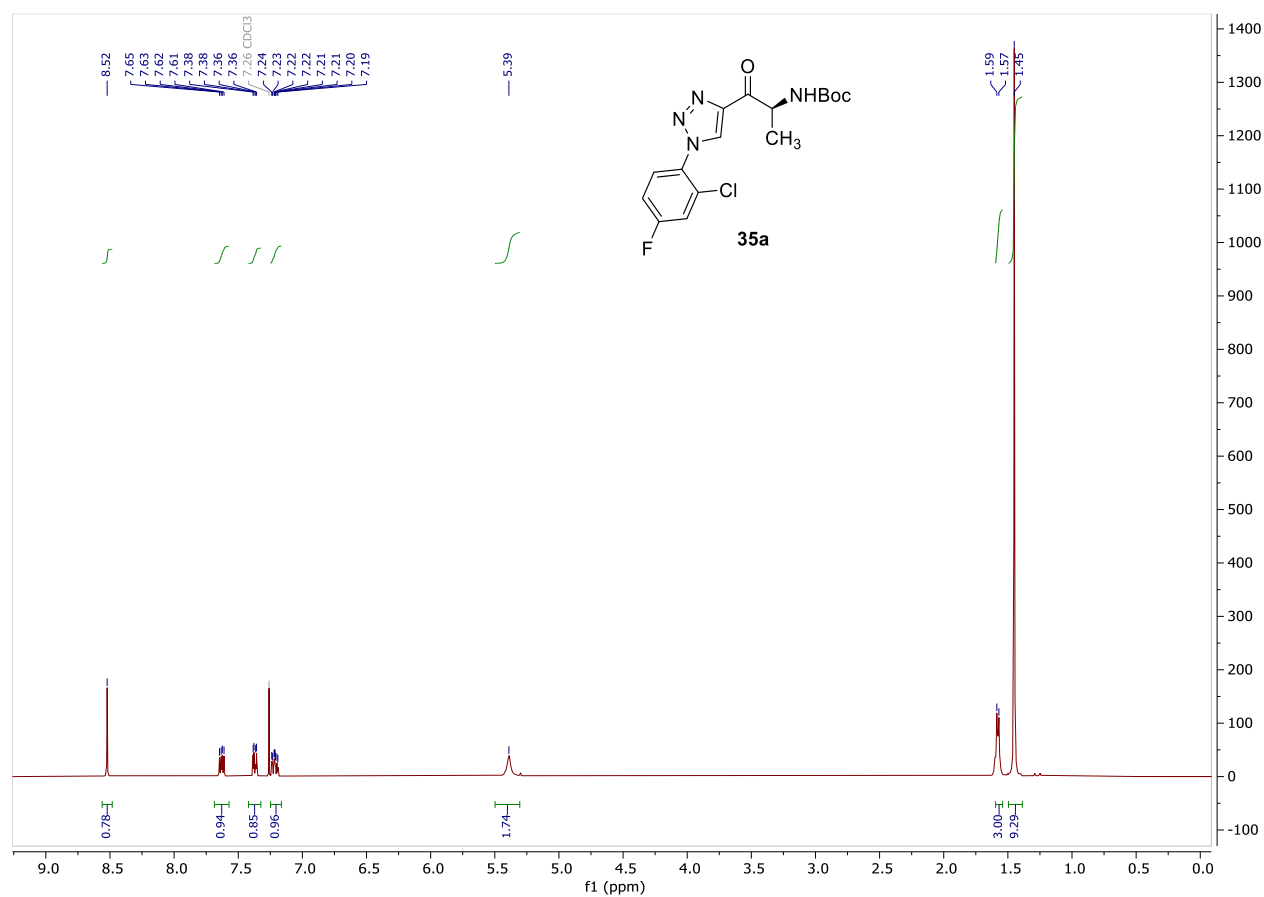

Compound **35a** ( $^{13}\text{C}$  NMR, 101 MHz):

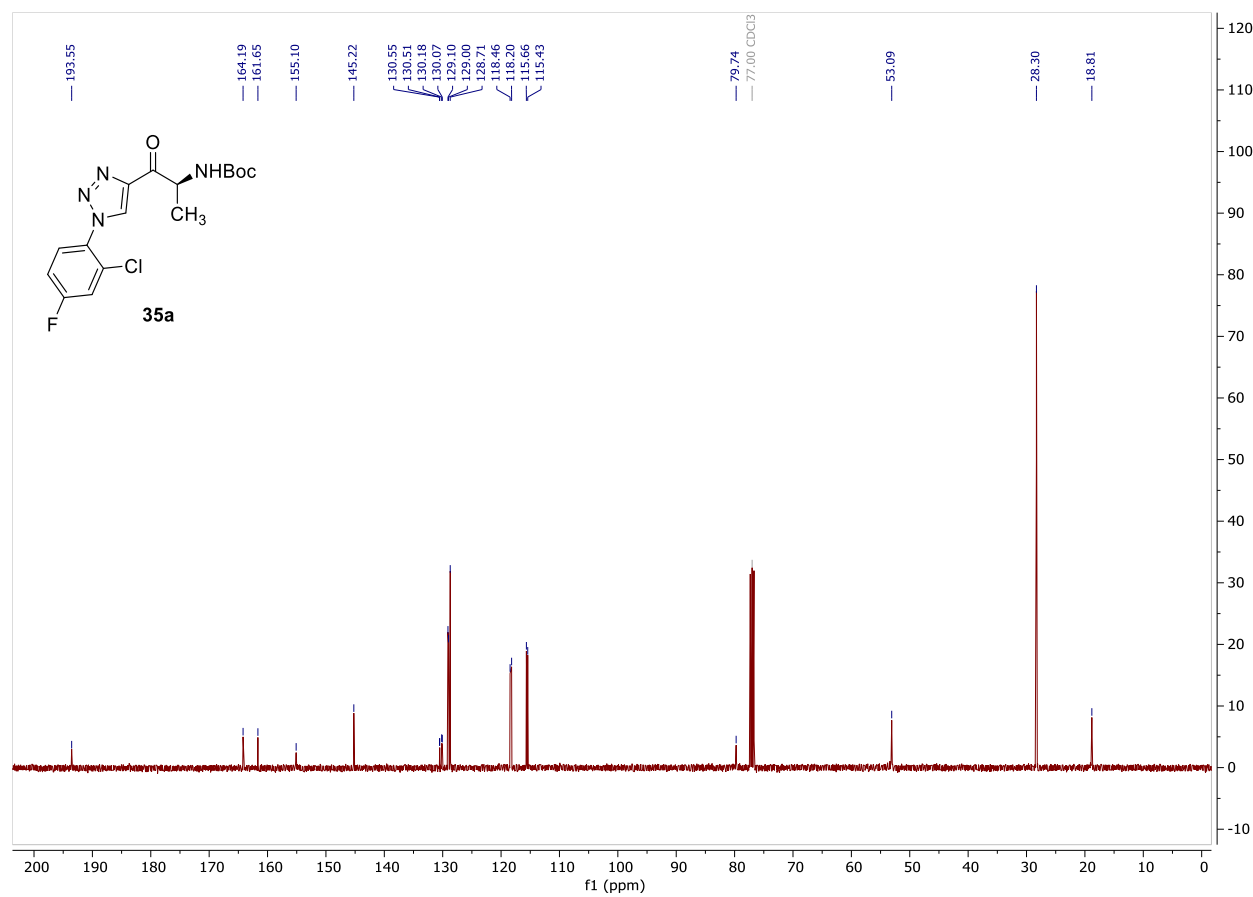

Compound **35a** ( $^{19}\text{F}$  NMR, 282 MHz):

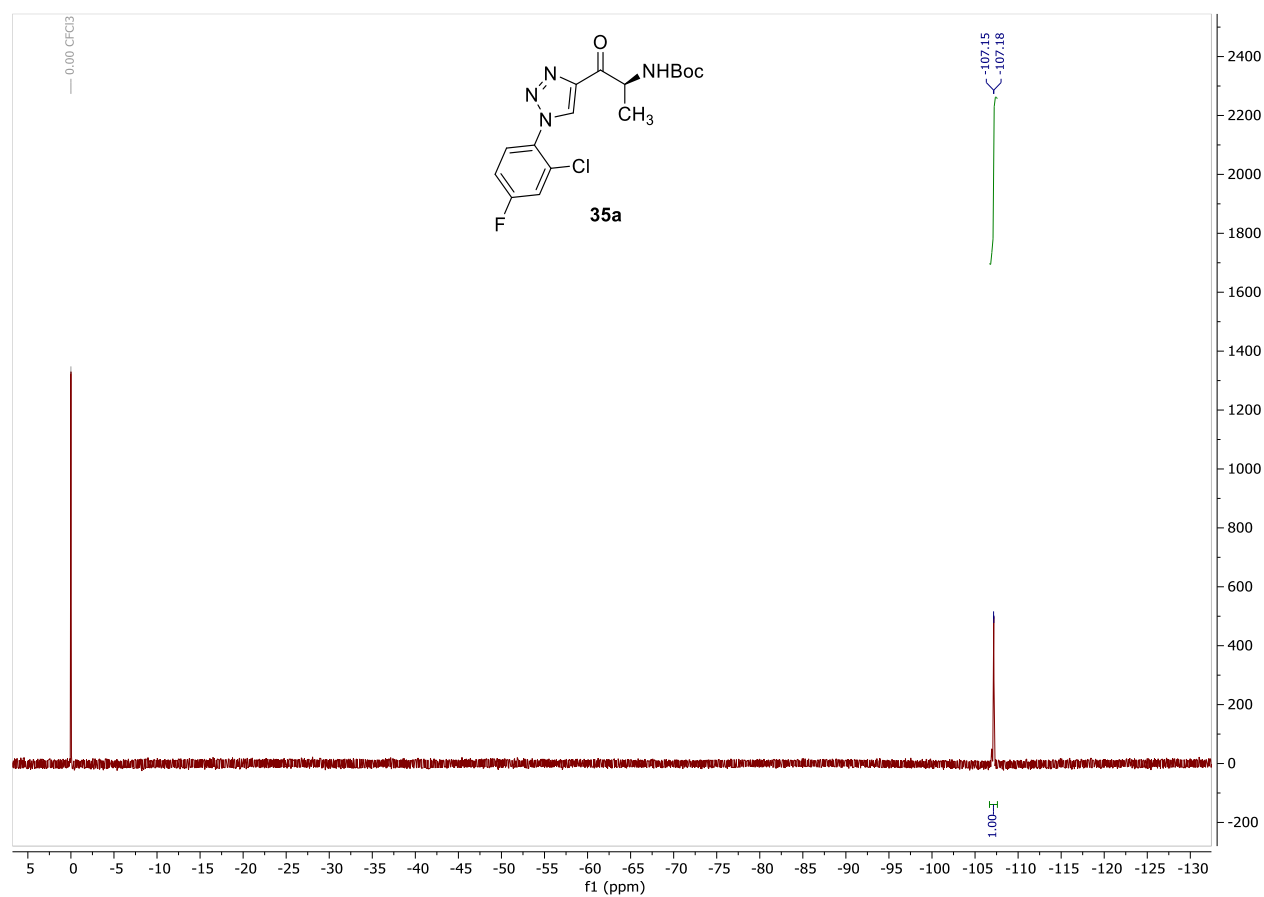

Compound **35b** ( $^1\text{H}$  NMR, 400 MHz):

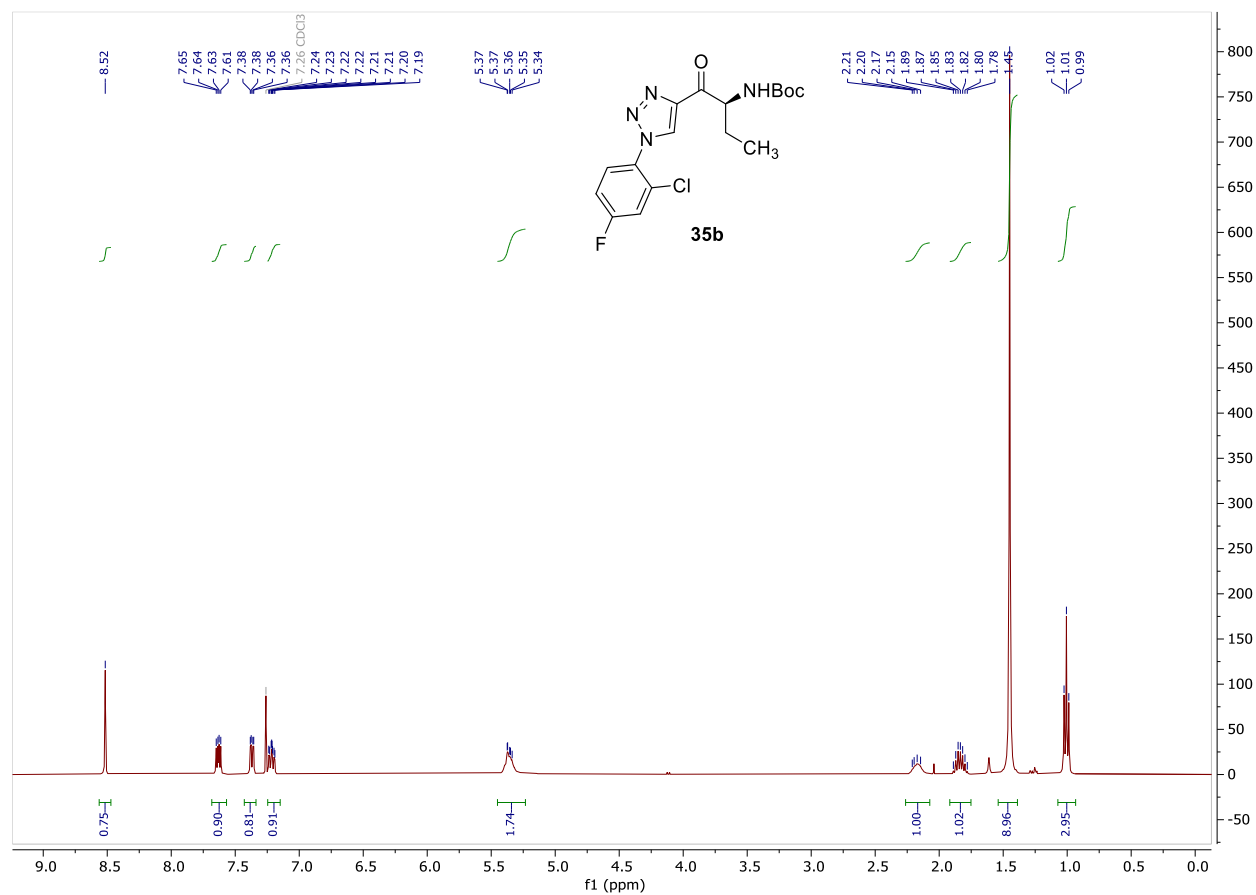

Compound **35b** ( $^{13}\text{C}$  NMR, 101 MHz):

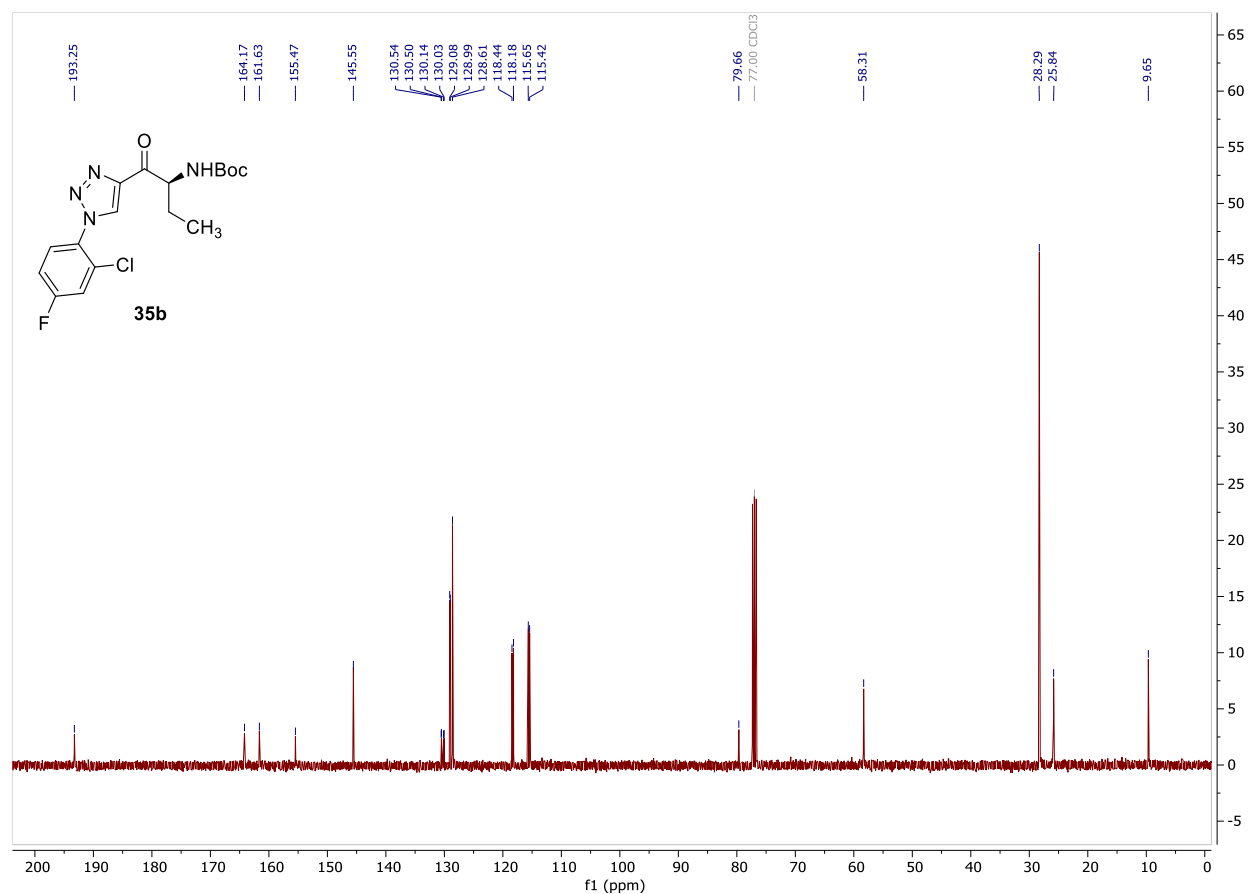

Compound **35b** ( $^{19}\text{F}$  NMR, 282 MHz):

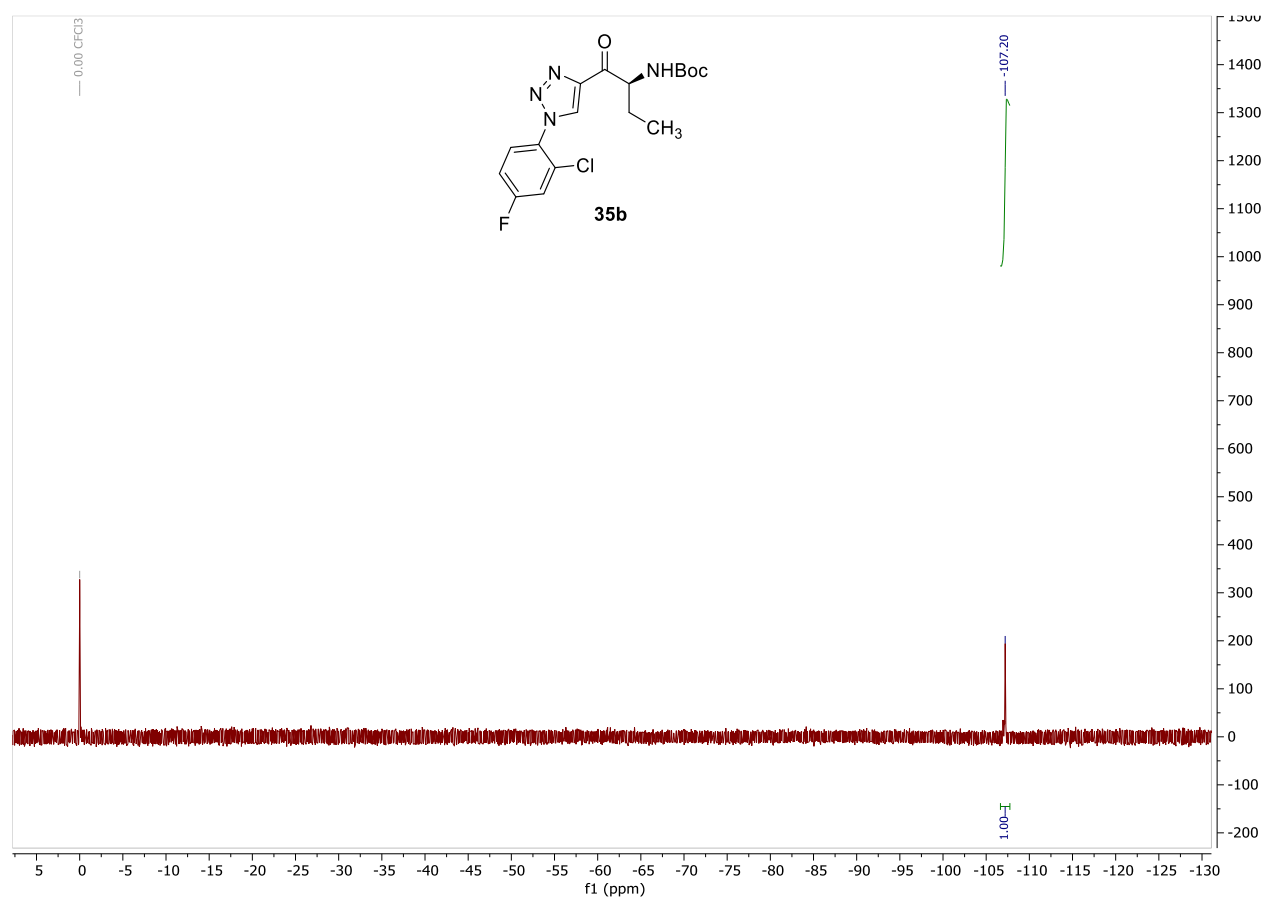

Compound **35c** ( $^1\text{H}$  NMR, 400 MHz):

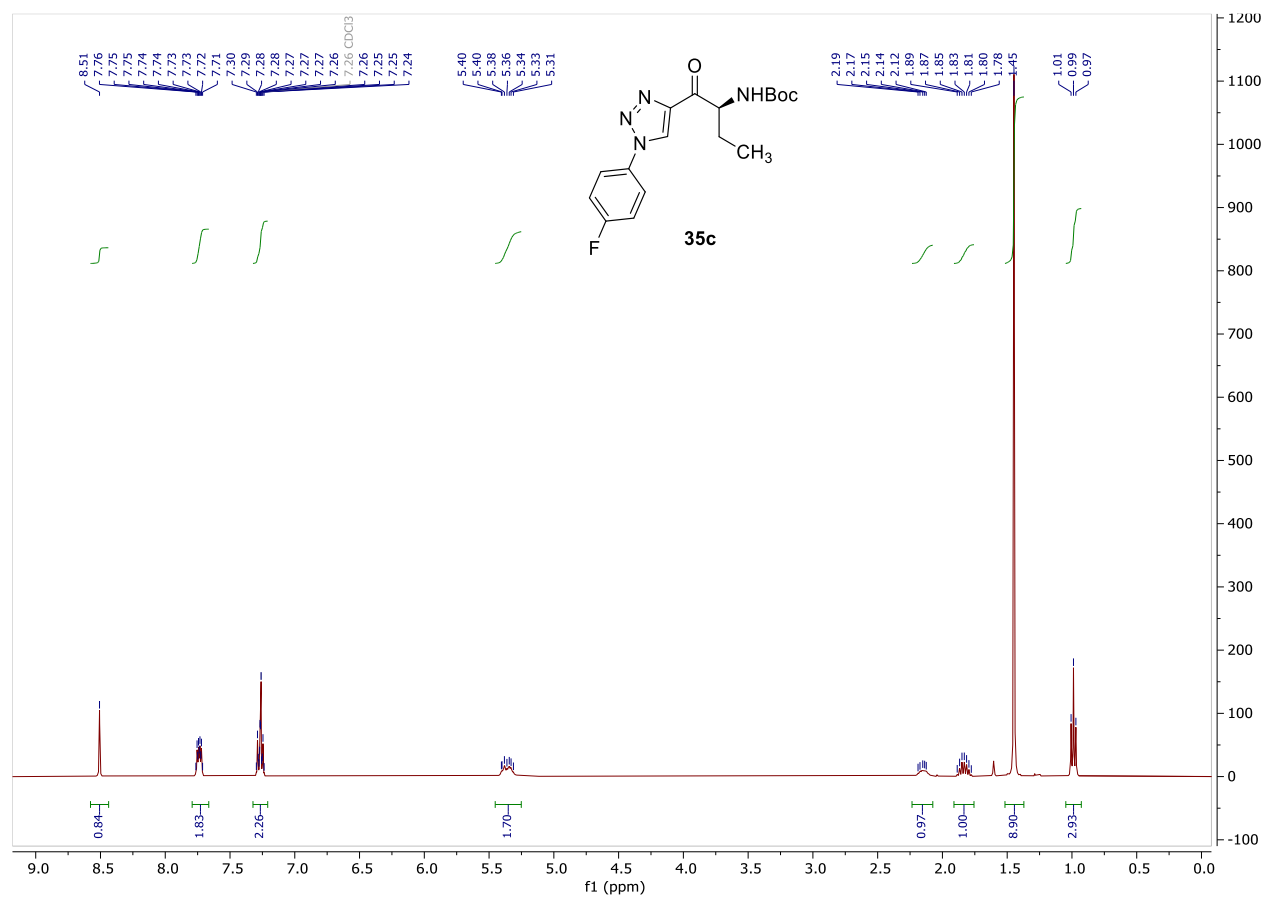

Compound **35c** ( $^{13}\text{C}$  NMR, 101 MHz):

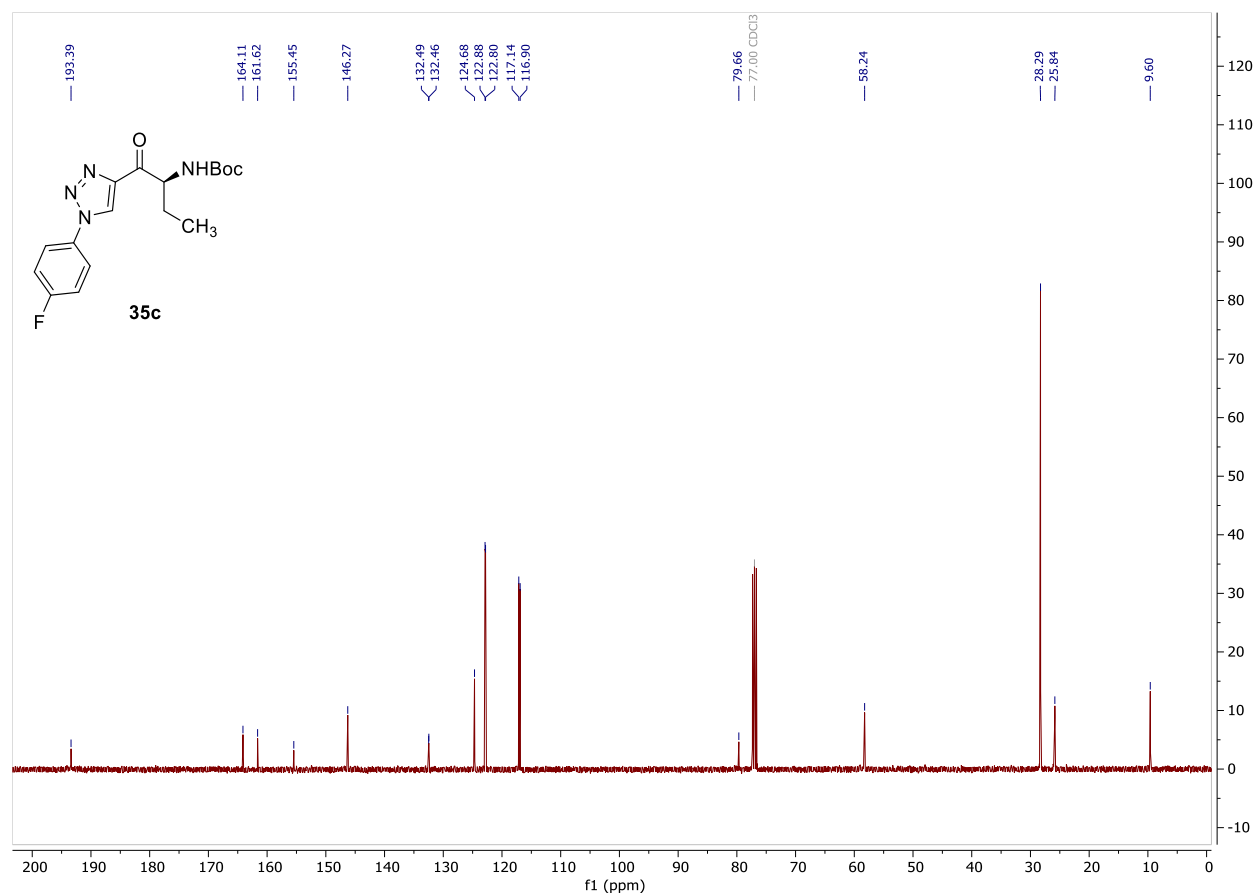



Compound **35c** ( $^{19}\text{F}$  NMR, 282 MHz):

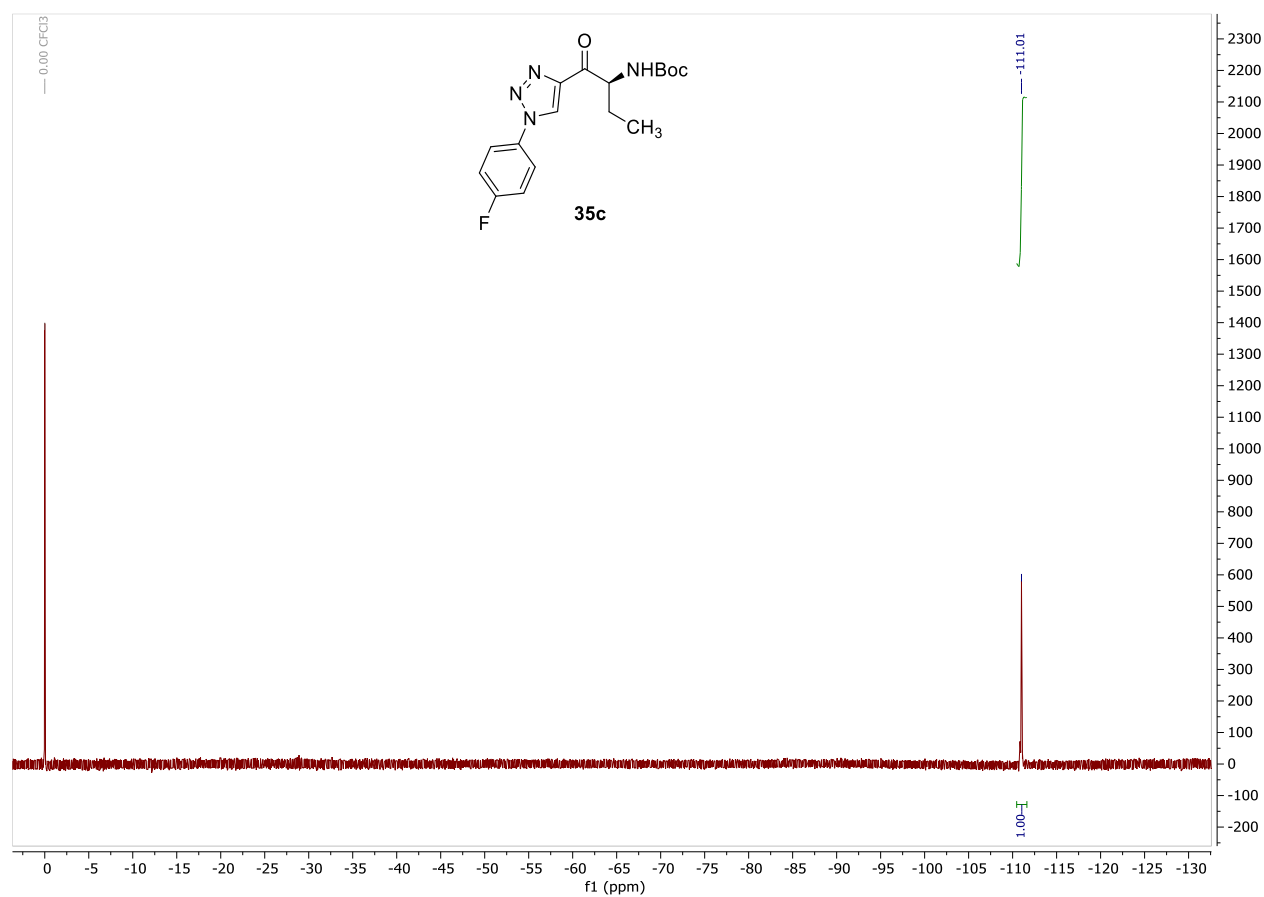

Compound **12** ( $^1\text{H}$  NMR, 400 MHz):

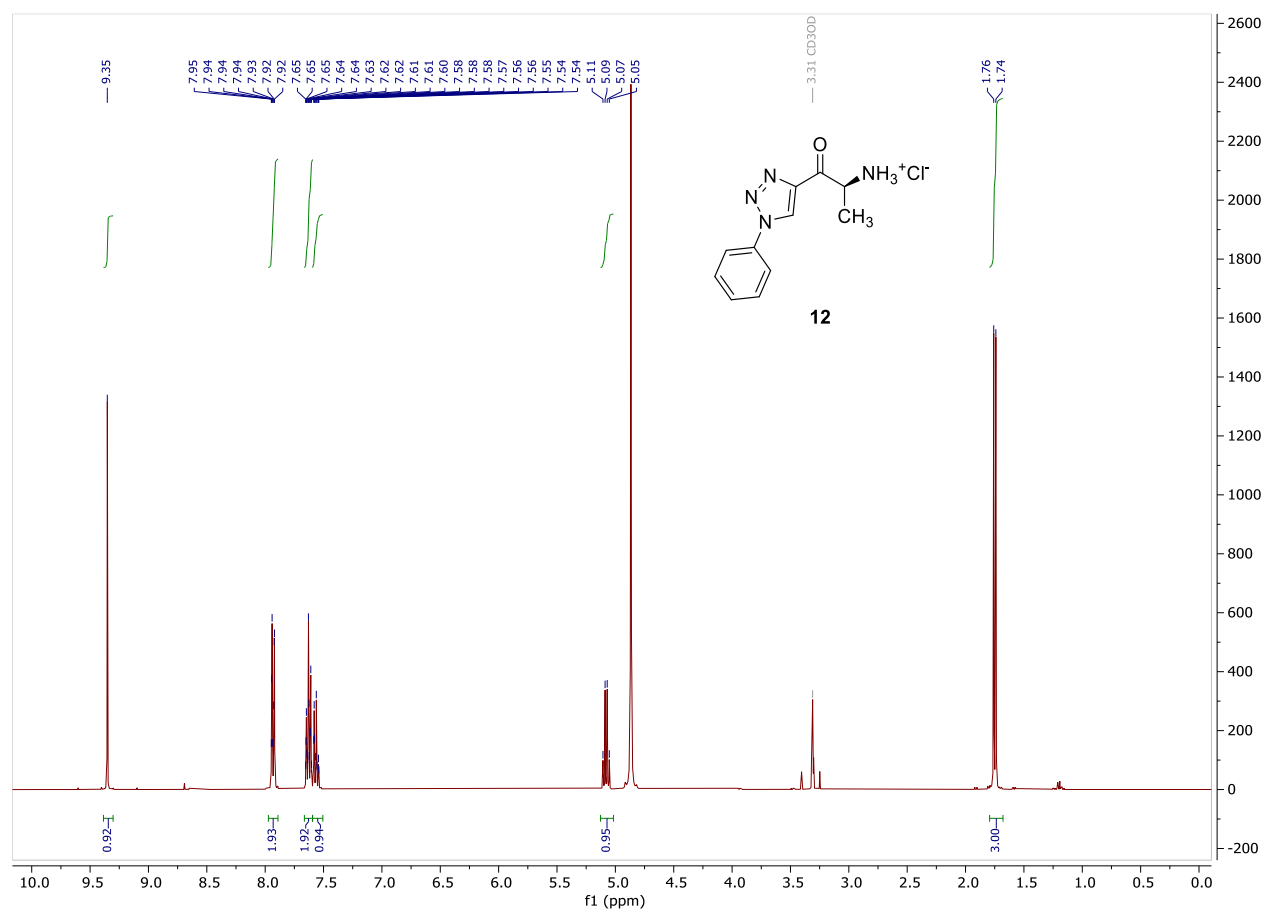

Compound **12** ( $^{13}\text{C}$  NMR, 101 MHz):

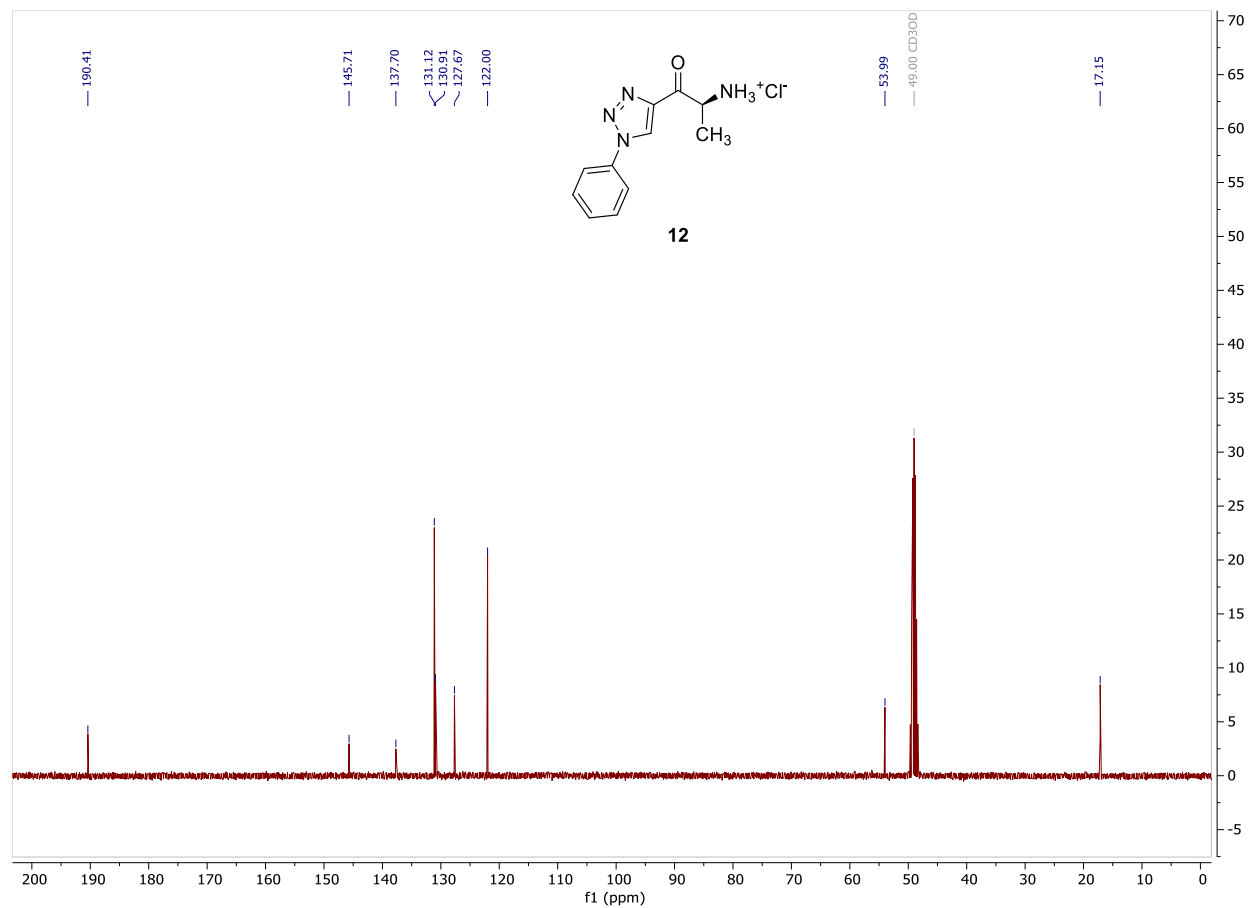

Compound **21a** ( $^1\text{H}$  NMR, 400 MHz):

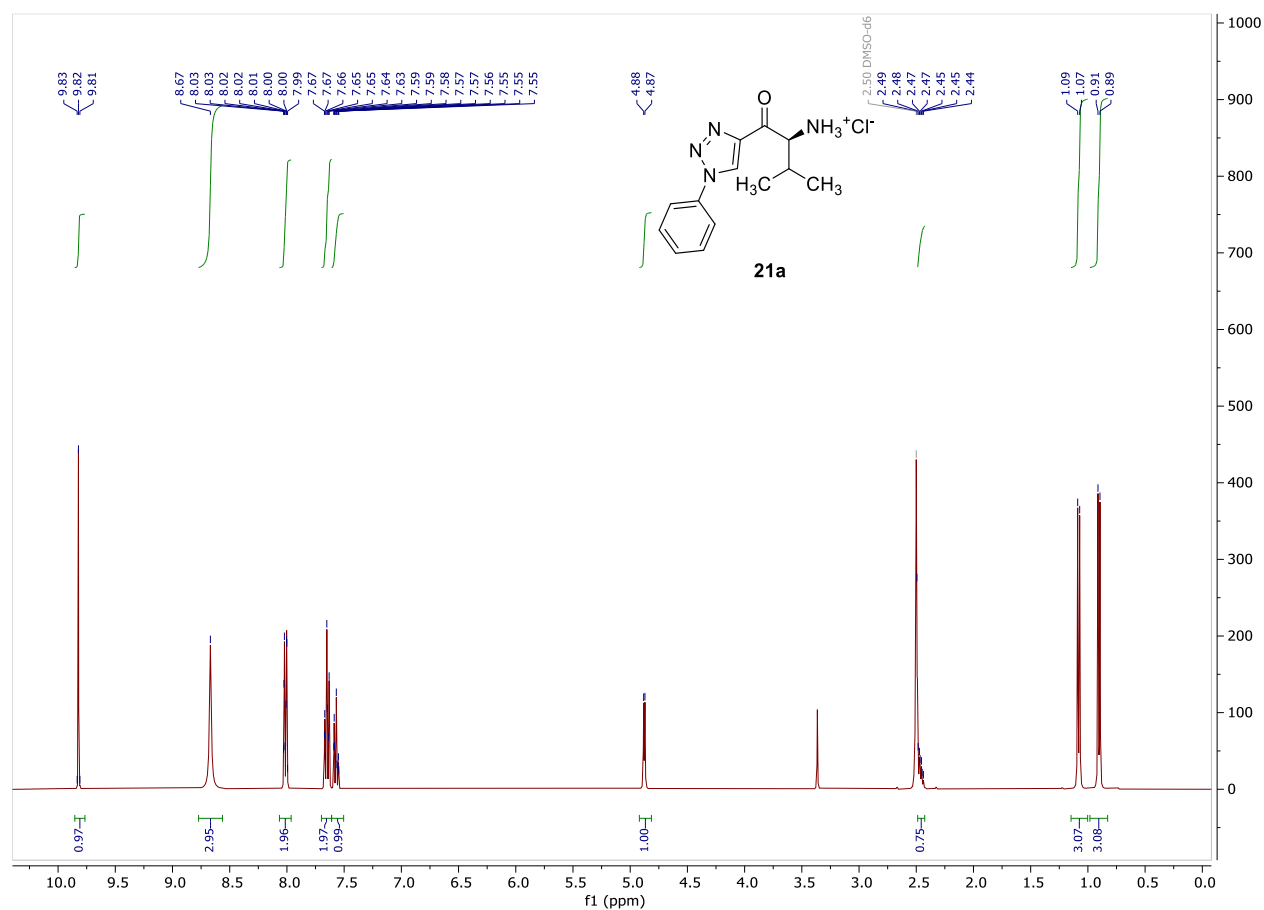

Compound **21a** ( $^{13}\text{C}$  NMR, 101 MHz):

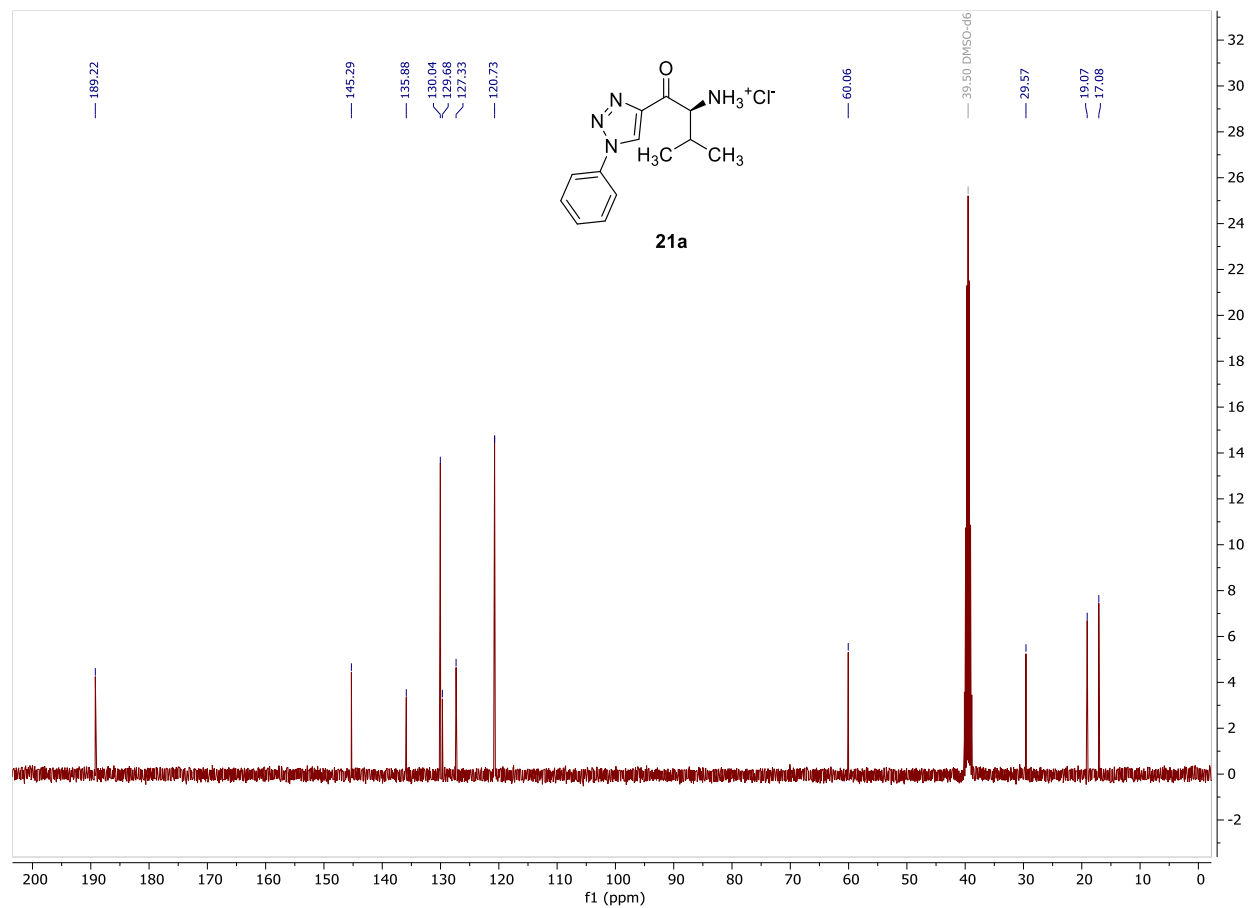

Compound **21b** ( $^1\text{H}$  NMR, 400 MHz):

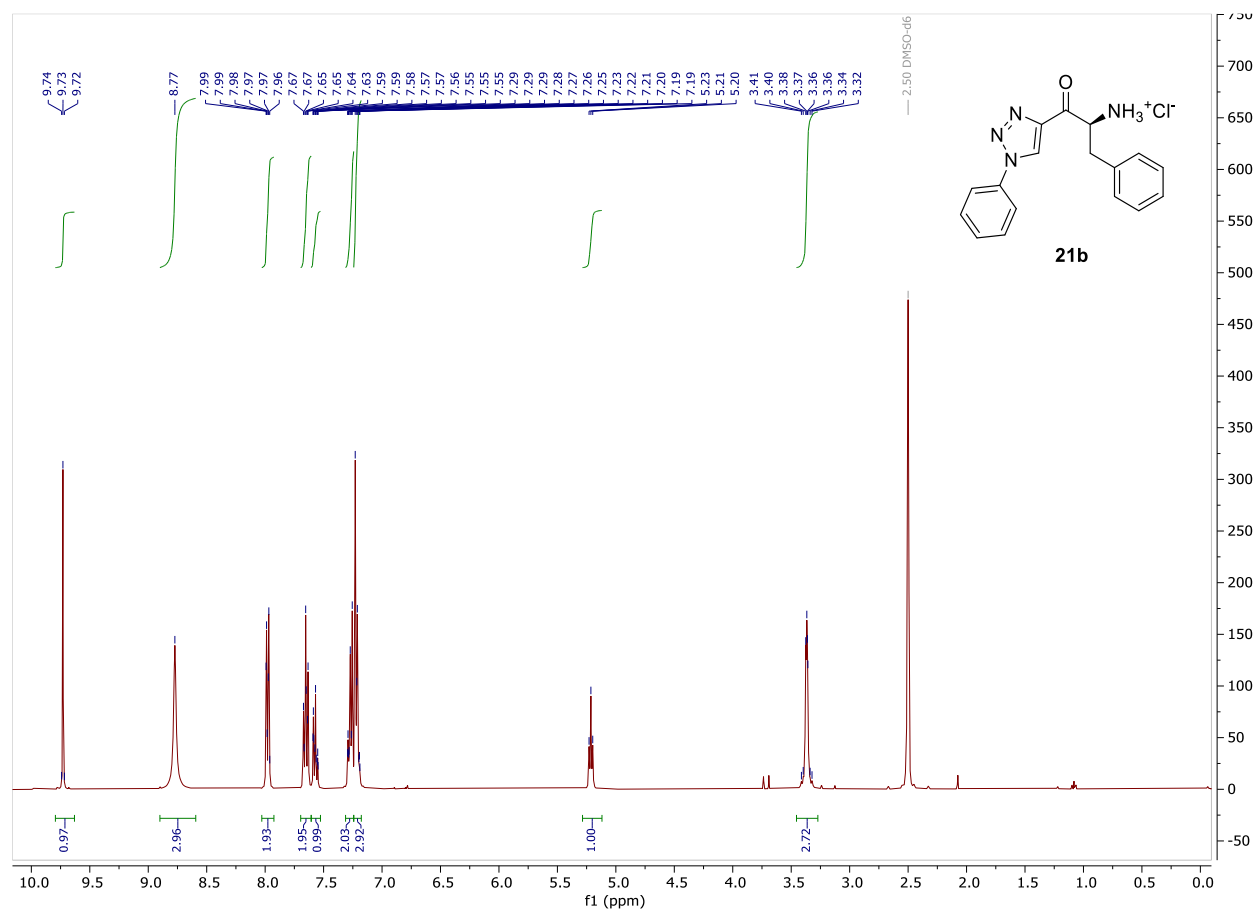

Compound **21b** ( $^{13}\text{C}$  NMR, 101 MHz):

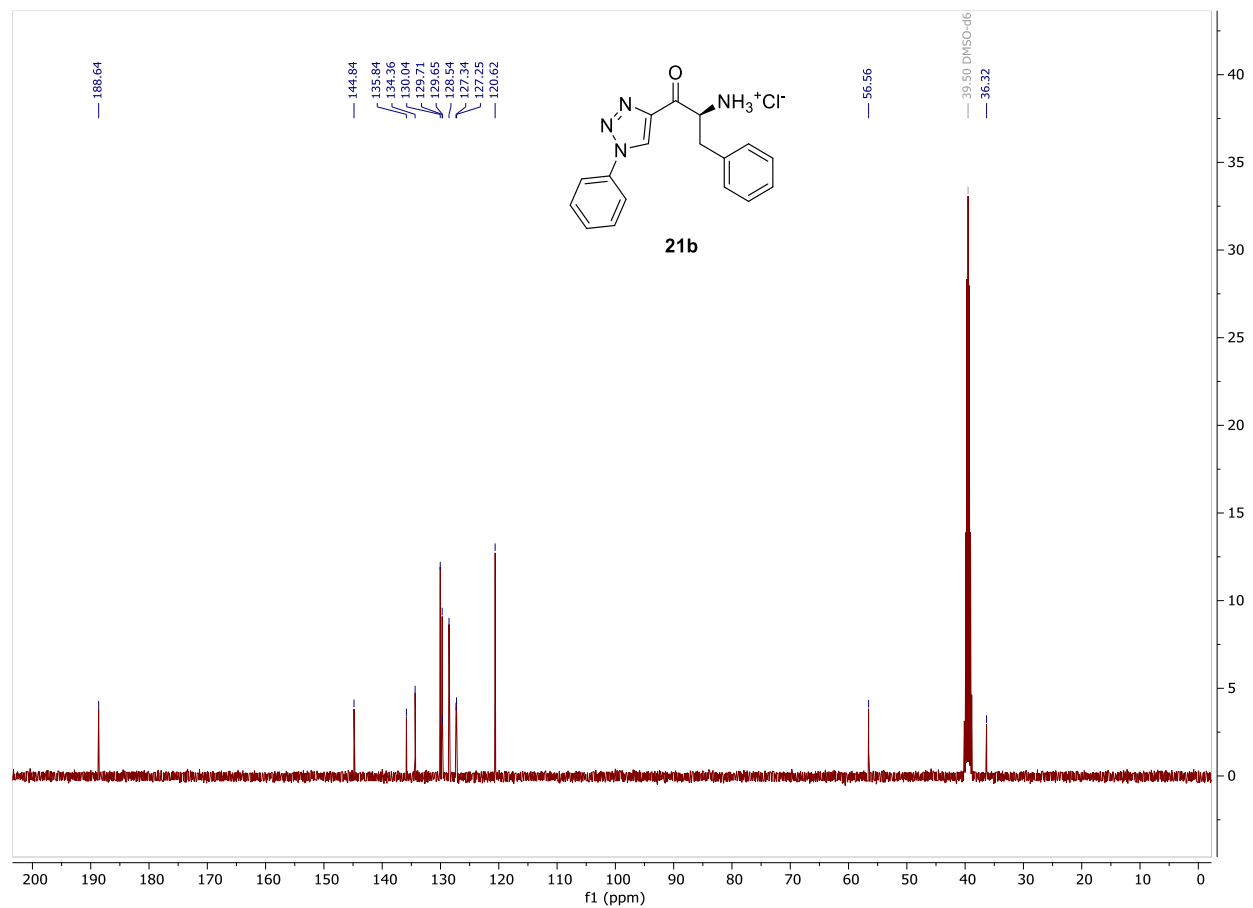

Compound **21c** ( $^1\text{H}$  NMR, 400 MHz):

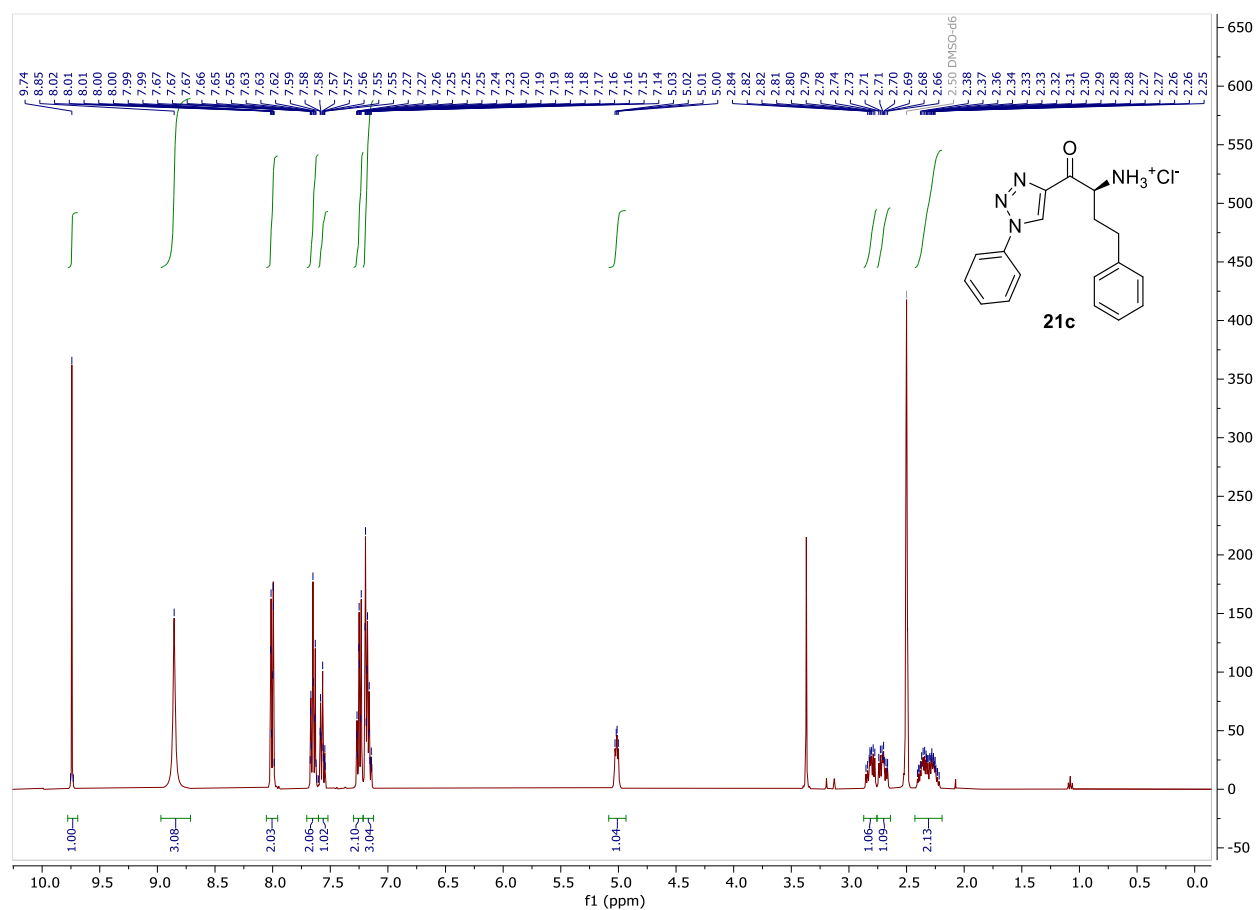

Compound **21c** ( $^{13}\text{C}$  NMR, 101 MHz):

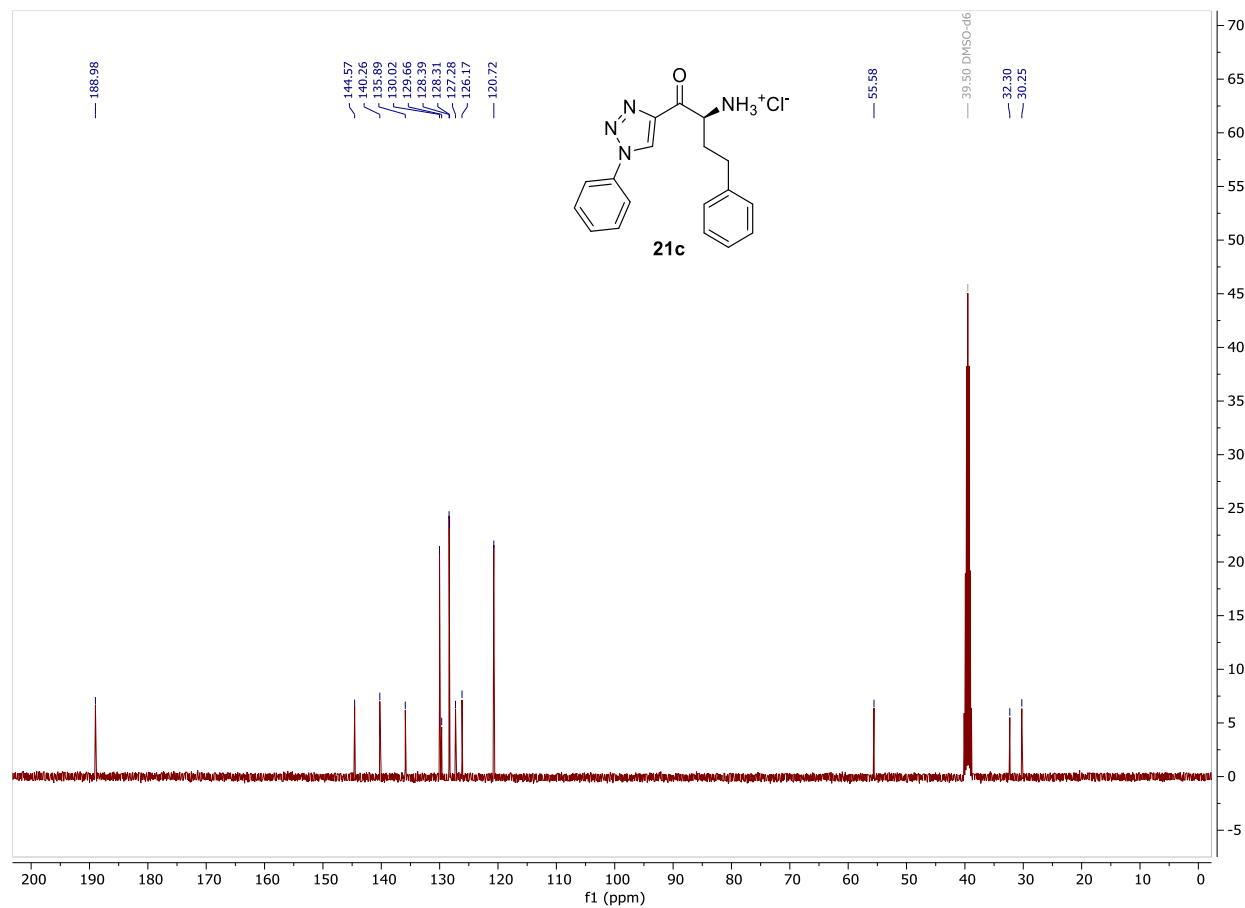

Compound **21d** ( $^1\text{H}$  NMR, 400 MHz):

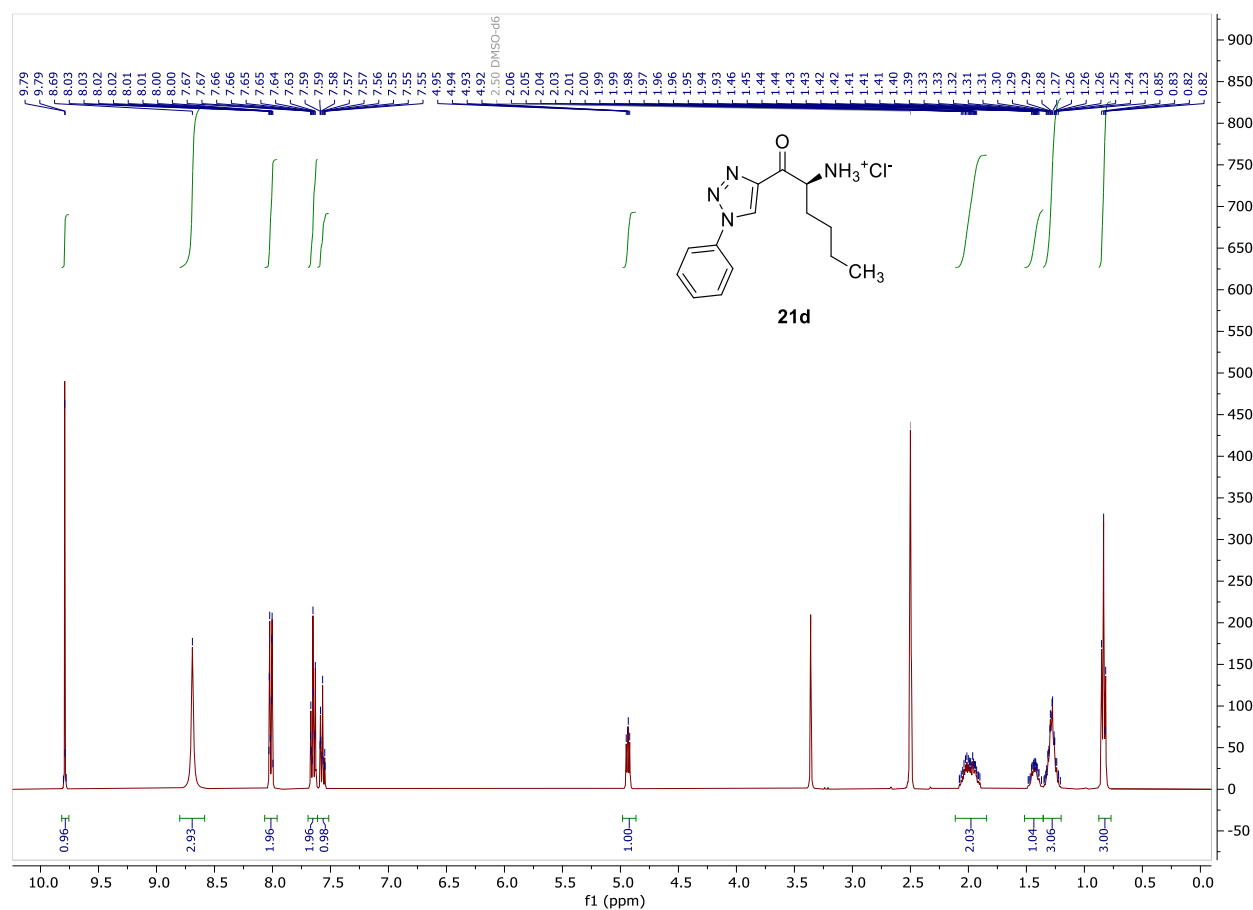

Compound **21d** ( $^{13}\text{C}$  NMR, 101 MHz):

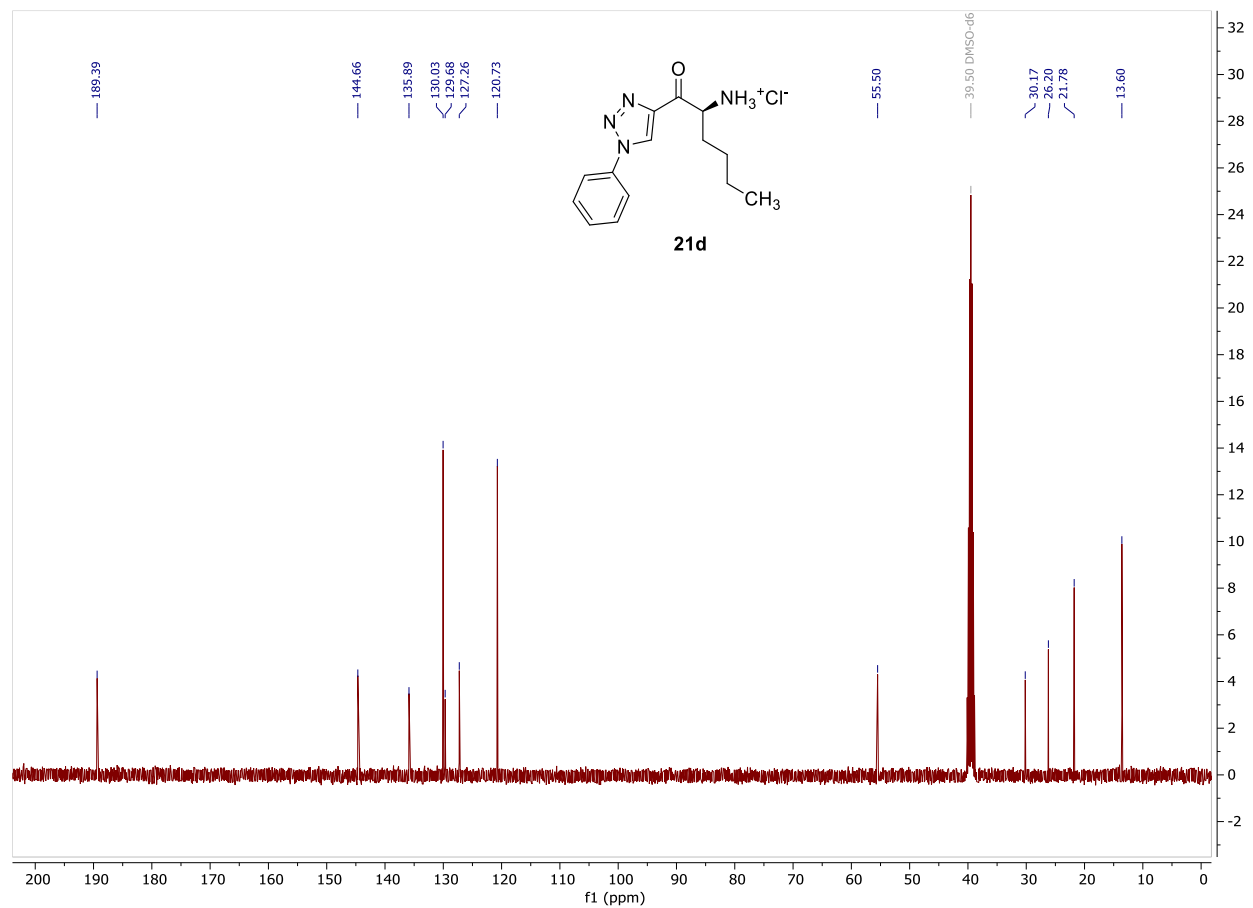

Compound **21e** ( $^1\text{H}$  NMR, 400 MHz):

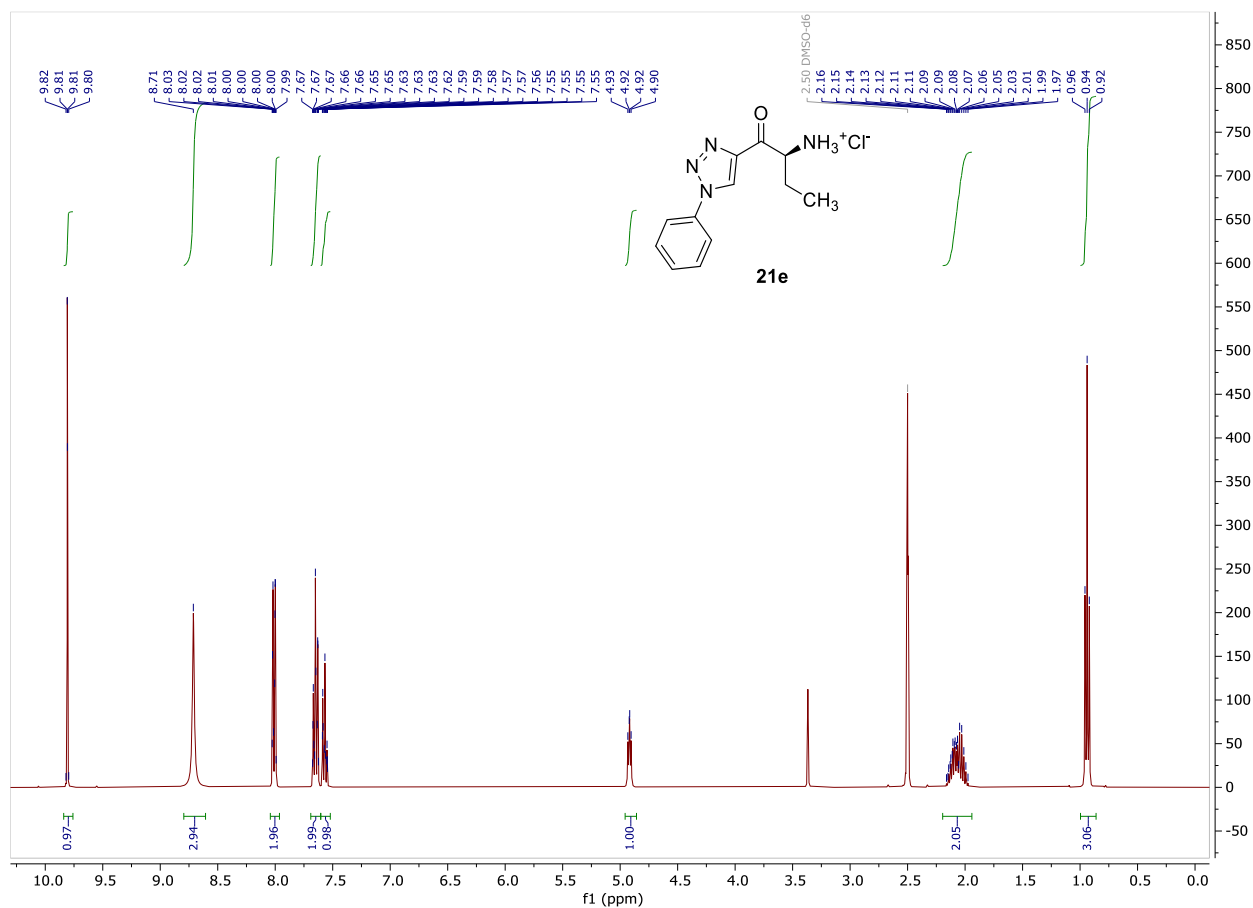

Compound **21e** ( $^{13}\text{C}$  NMR, 101 MHz):

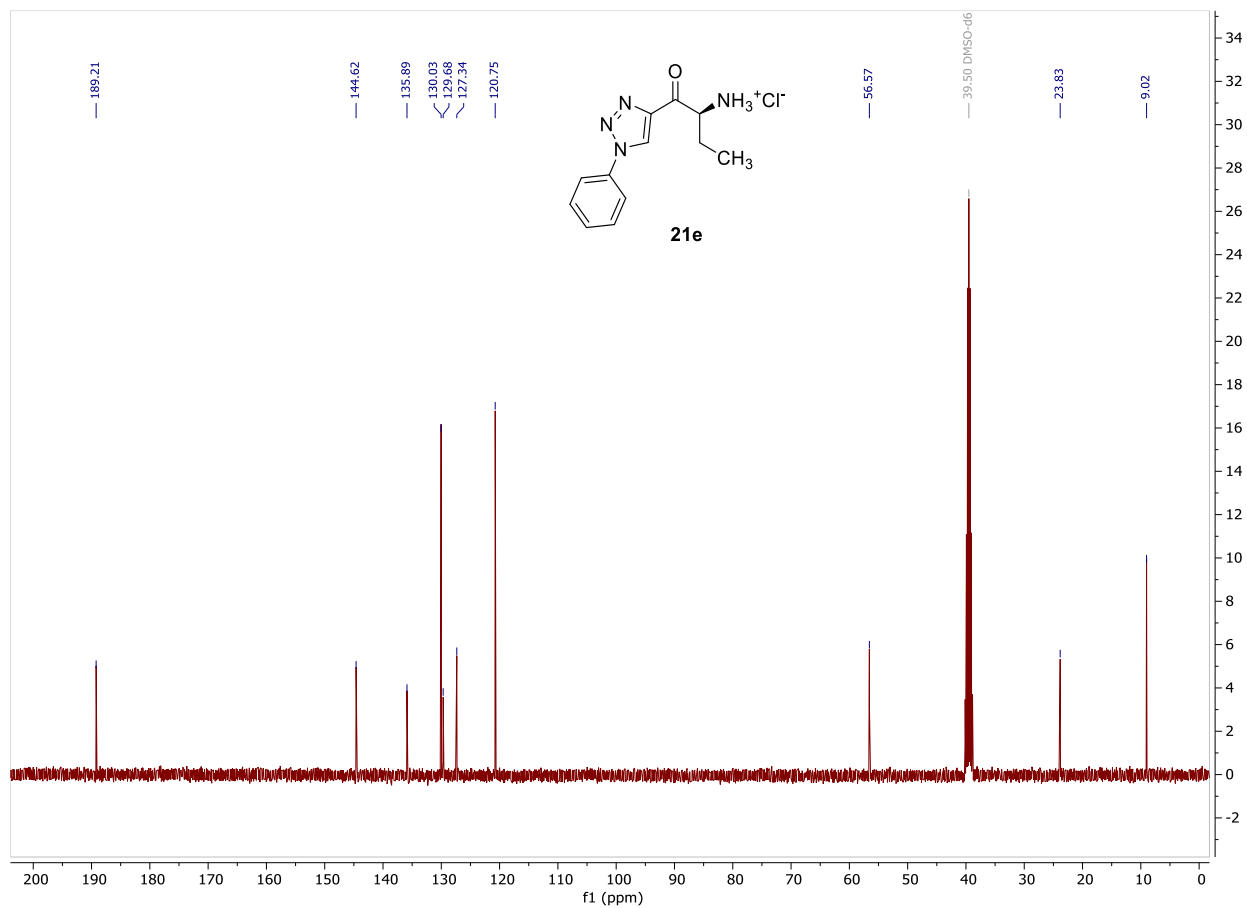

Compound **21f** ( $^1\text{H}$  NMR, 400 MHz):

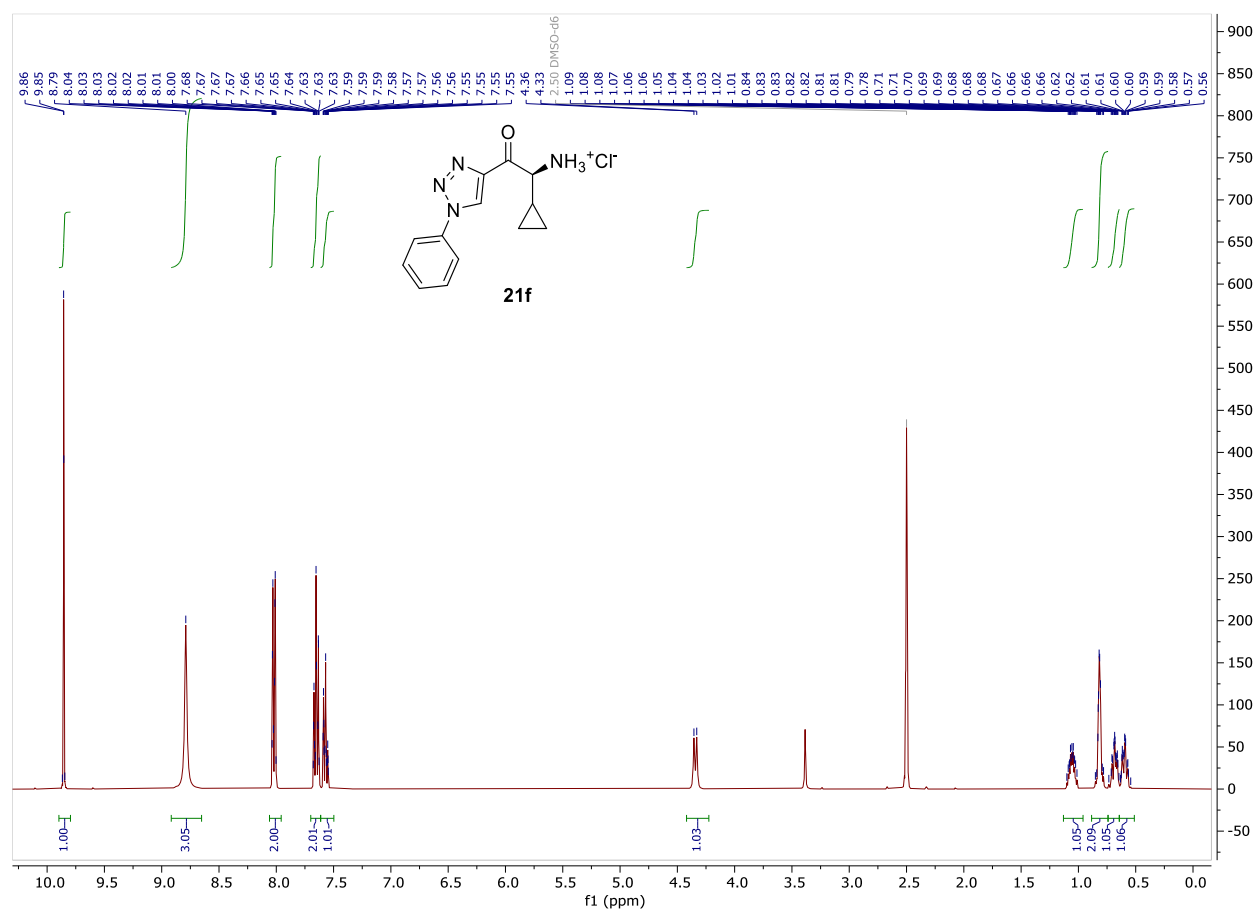

Compound **21f** ( $^{13}\text{C}$  NMR, 101 MHz):

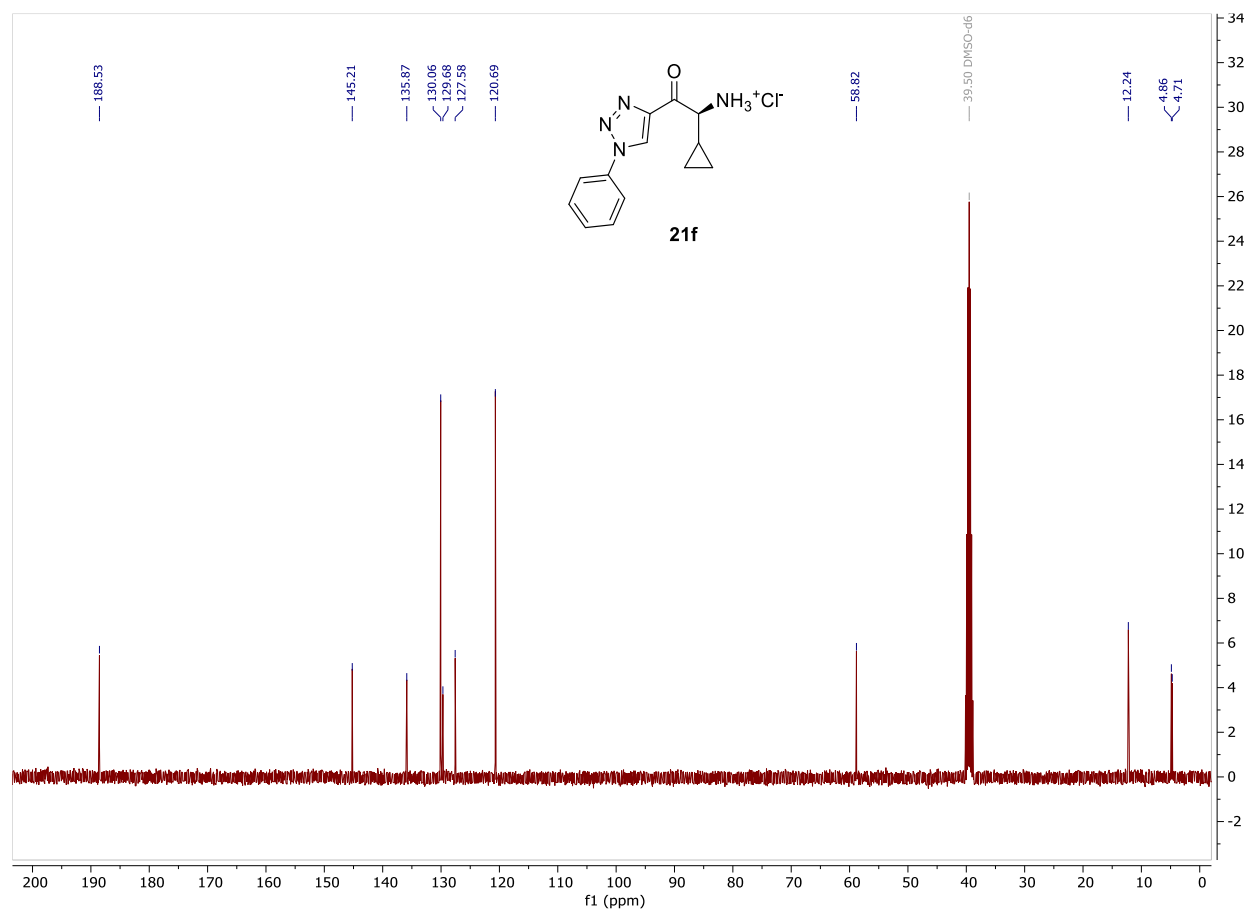



Compound **28a** ( $^1\text{H}$  NMR, 400 MHz):

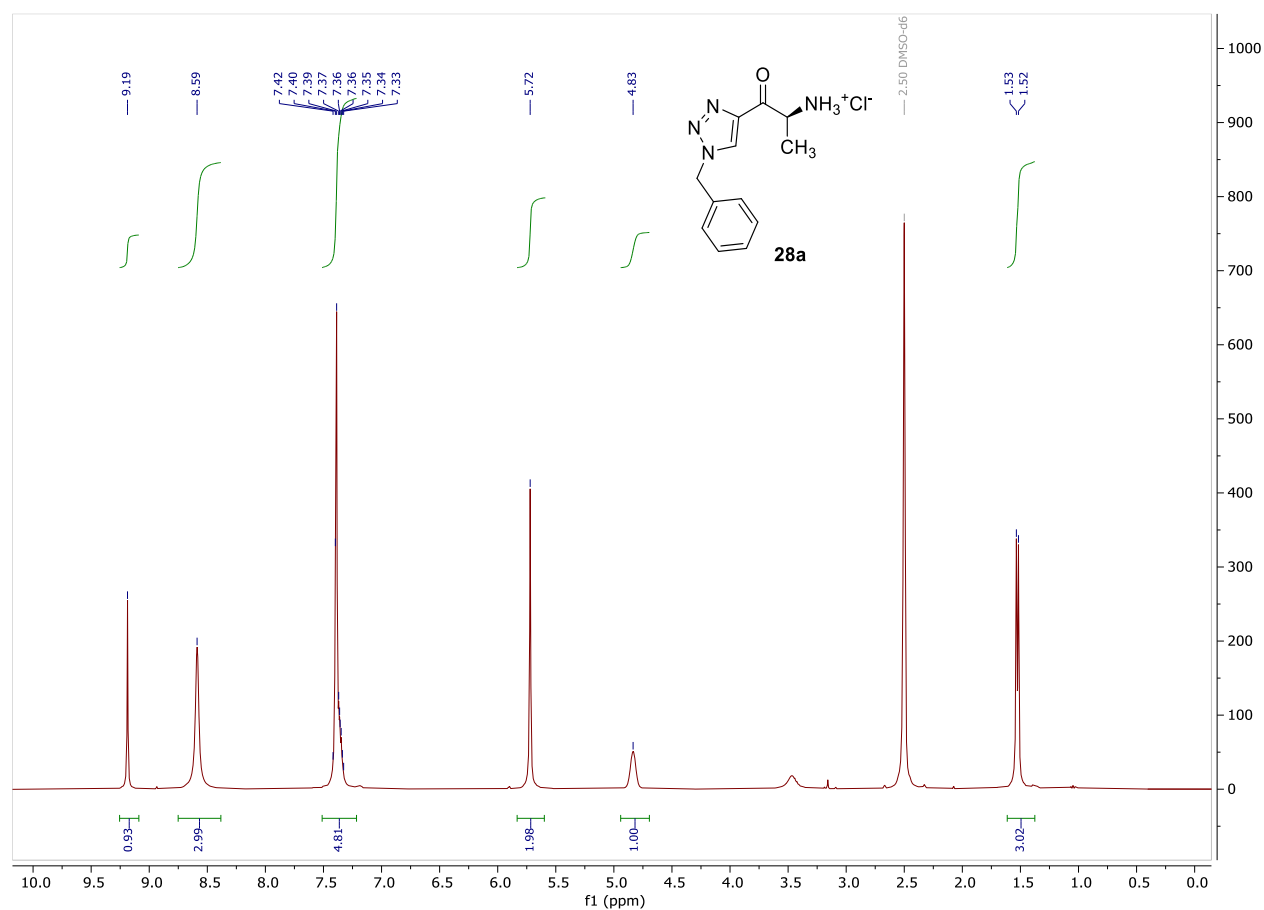

Compound **28a** ( $^{13}\text{C}$  NMR, 101 MHz):

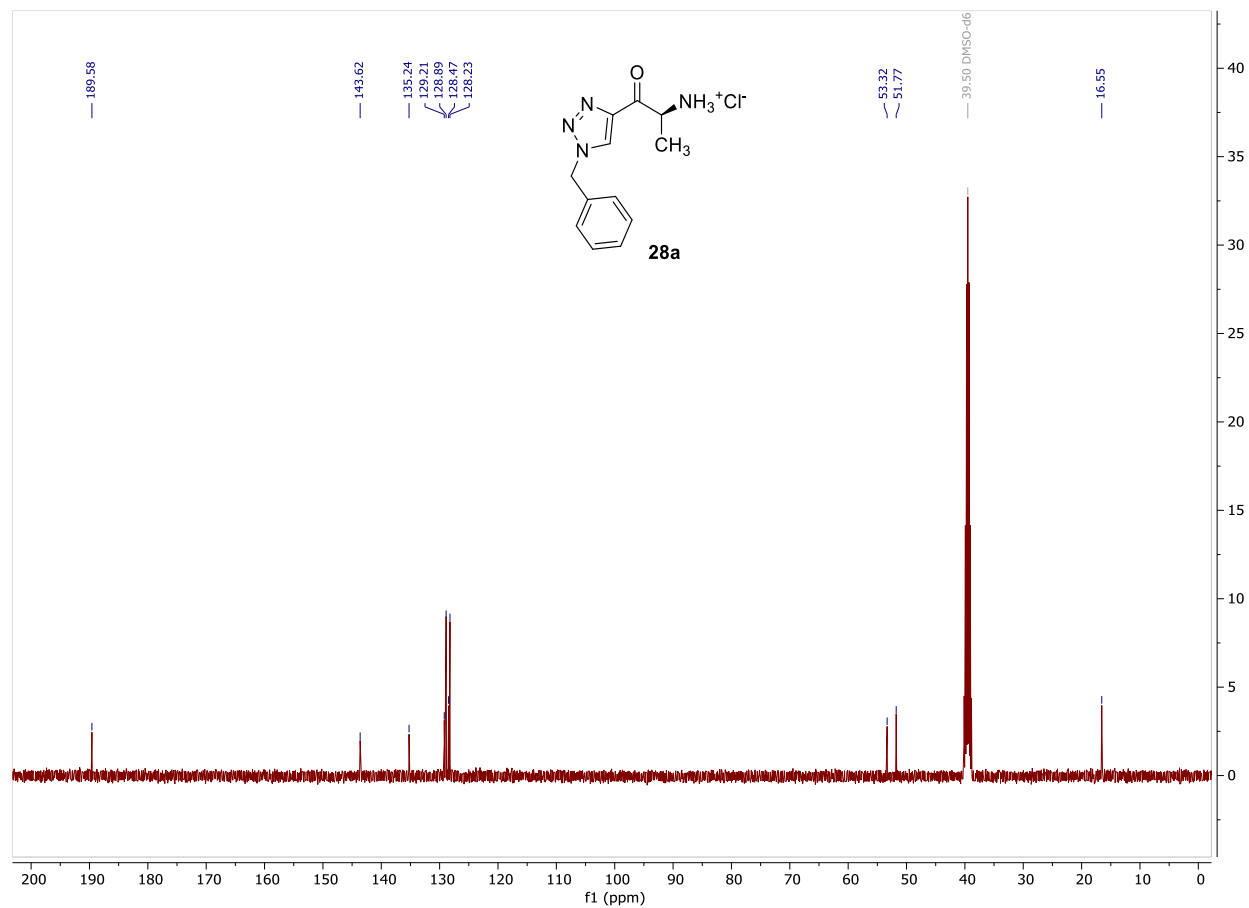

Compound **28b** ( $^1\text{H}$  NMR, 400 MHz):

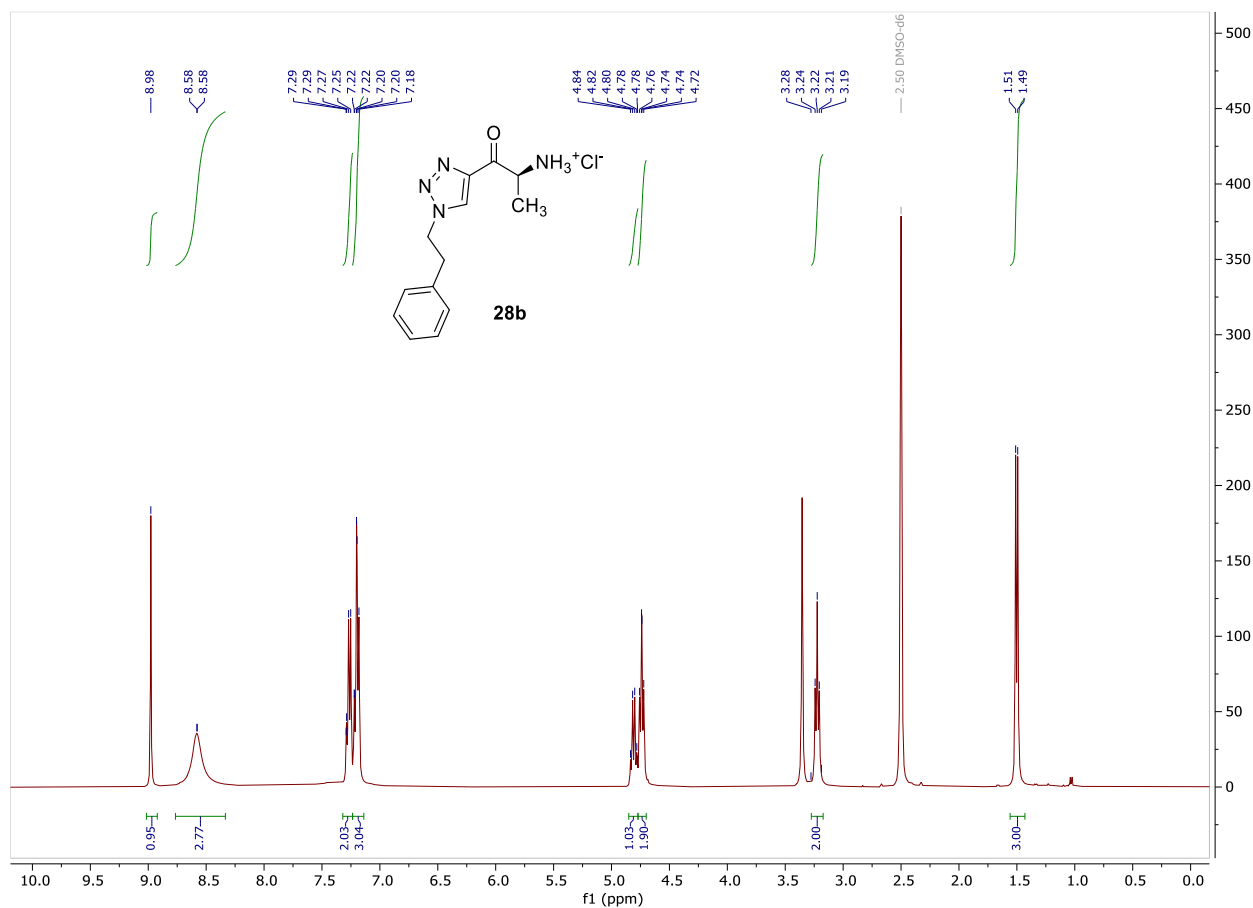

Compound **28b** ( $^{13}\text{C}$  NMR, 101 MHz):

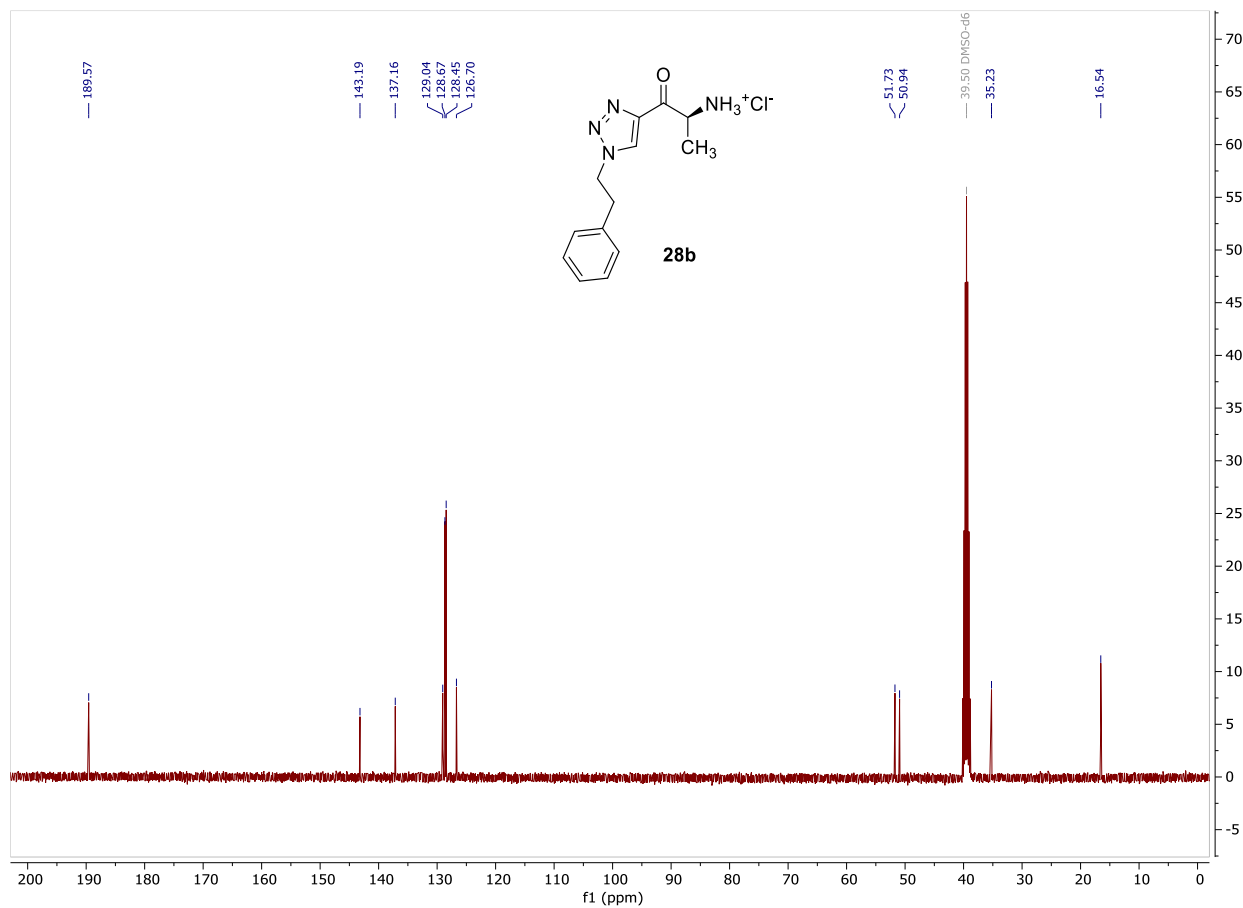

Compound **26a** ( $^1\text{H}$  NMR, 400 MHz):

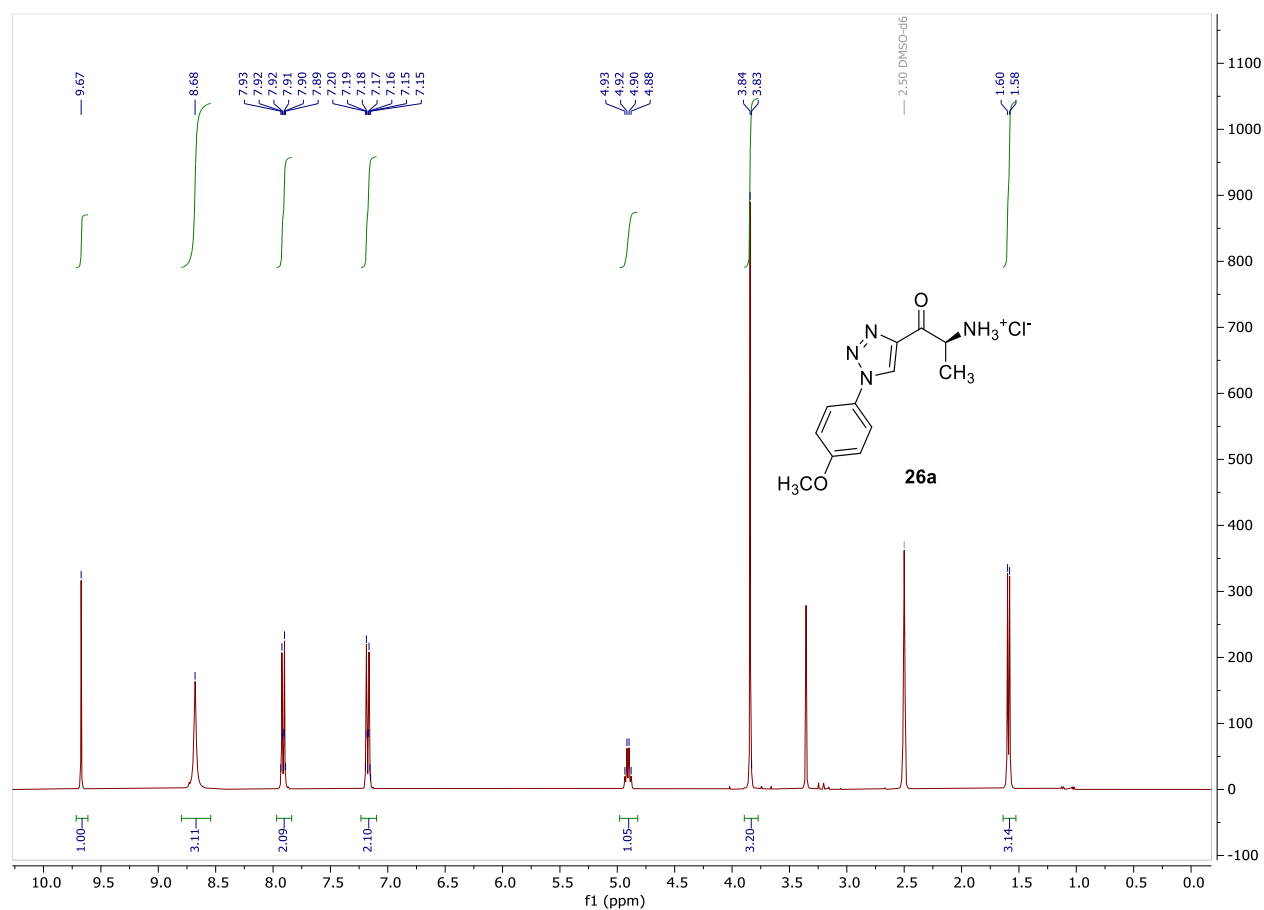

Compound **26a** ( $^{13}\text{C}$  NMR, 101 MHz):

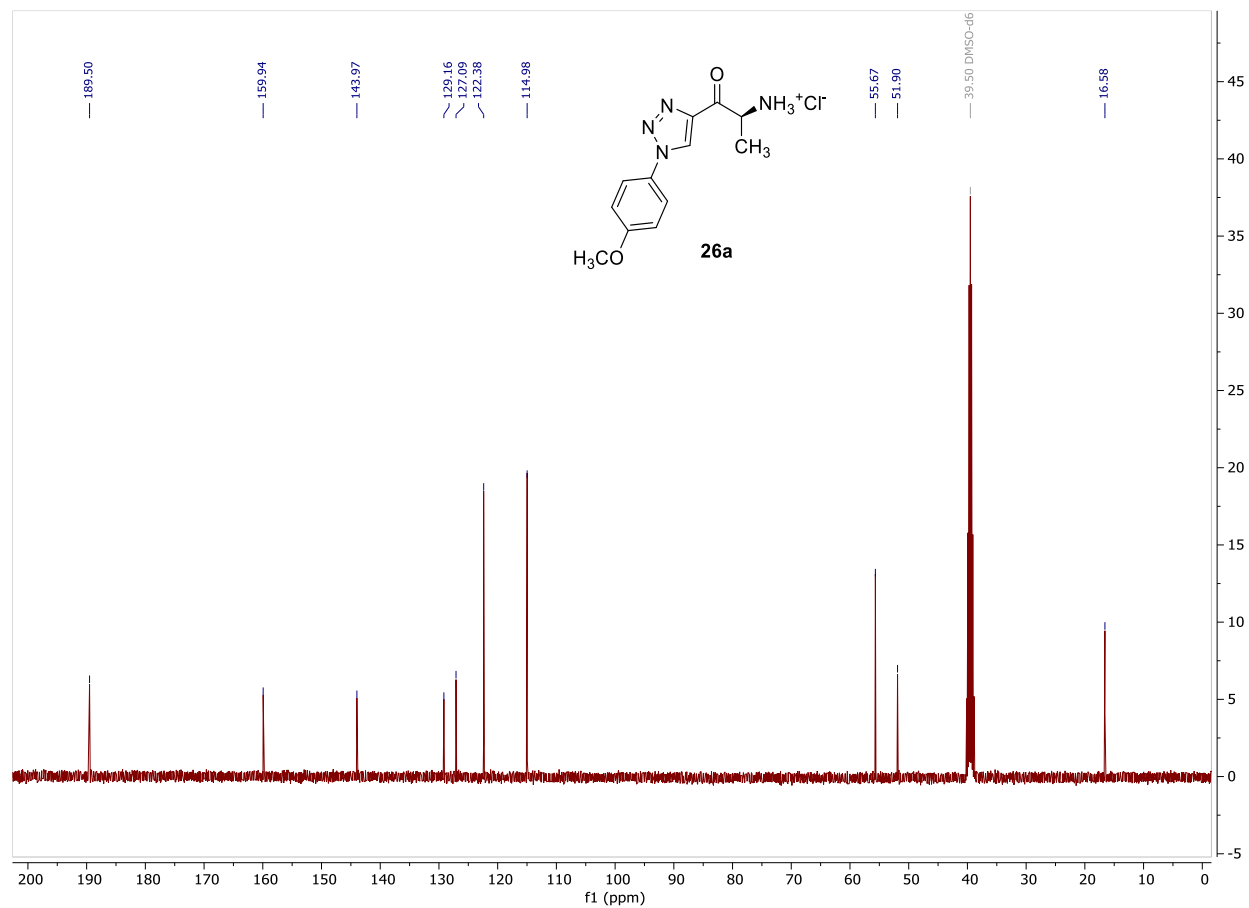

Compound **26b** ( $^1\text{H}$  NMR, 400 MHz):

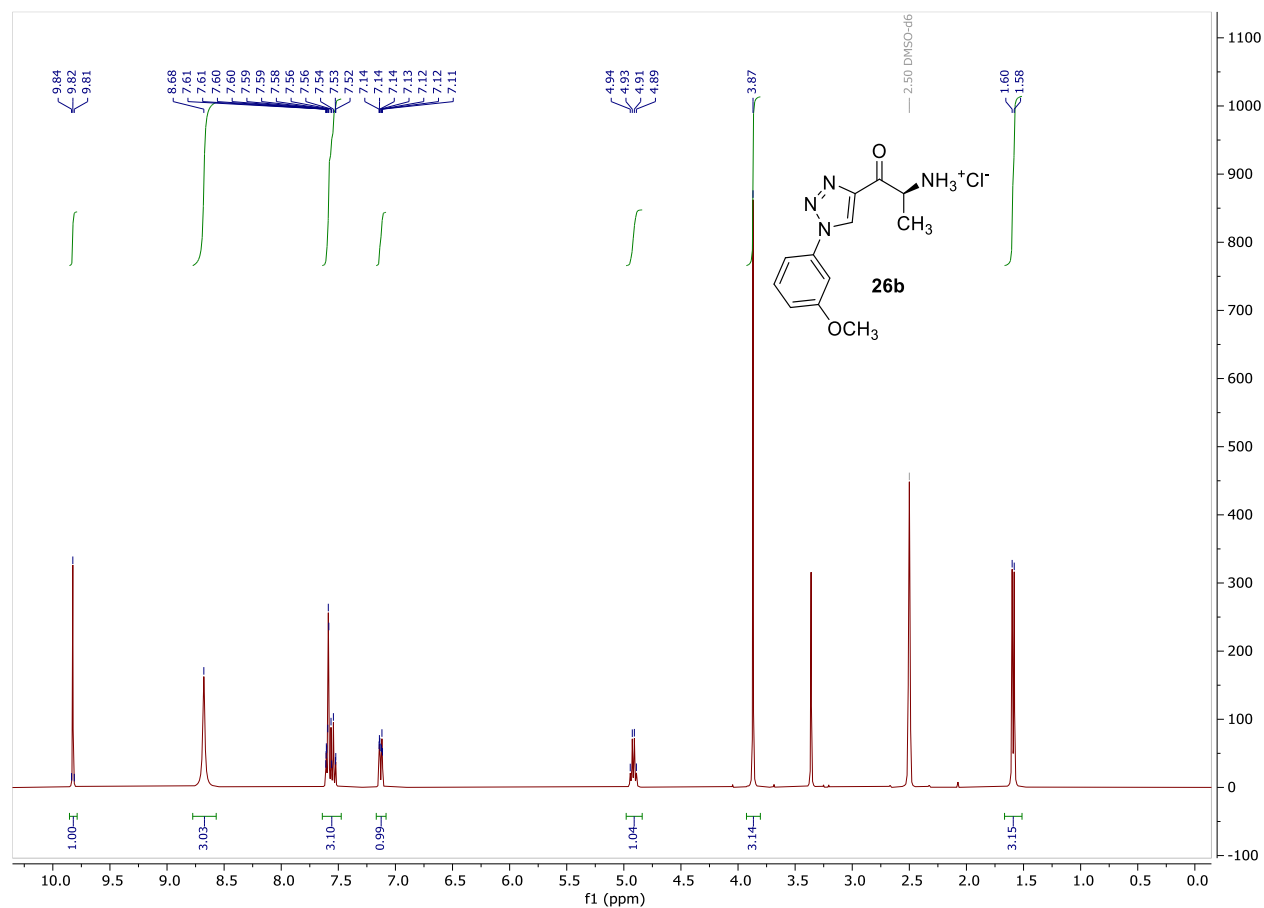

Compound **26b** ( $^{13}\text{C}$  NMR, 101 MHz):

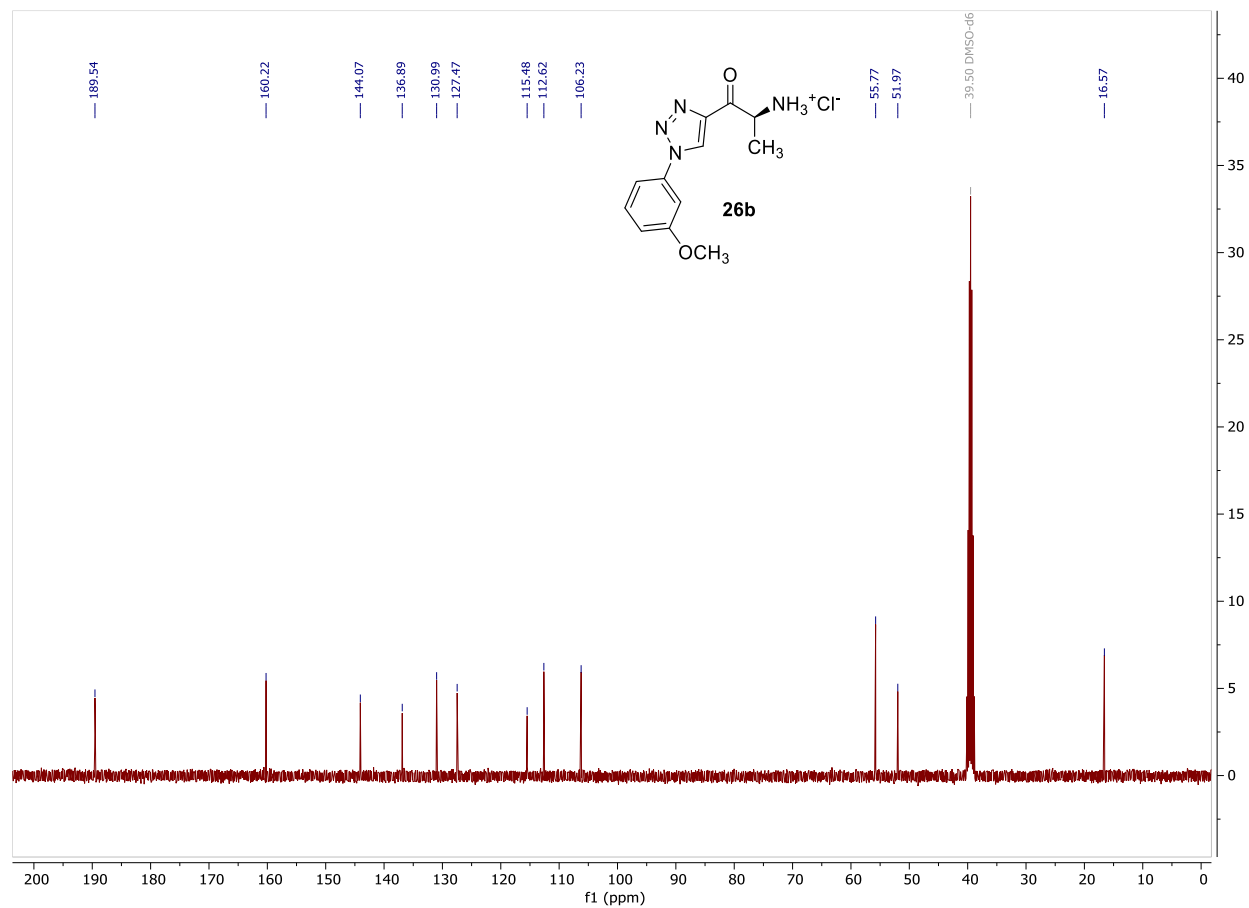

**Chemical structure of 26c:** COc1ccccc1n2nc(C(=O)[C@H](N)Cl)c2

**<sup>1</sup>H NMR spectrum (DMSO-d<sub>6</sub>):**

| Chemical Shift (ppm)                                                                                             | Integration |
|------------------------------------------------------------------------------------------------------------------|-------------|
| 9.37, 9.36, 9.35                                                                                                 | 0.87        |
| 8.65, 7.69, 7.67, 7.66, 7.63, 7.62, 7.61, 7.60, 7.59, 7.58, 7.38, 7.37, 7.36, 7.21, 7.20, 7.19, 7.18, 7.17, 7.16 | 2.98        |
| 4.93, 4.91                                                                                                       | 1.00        |
| 3.86                                                                                                             | 3.01        |
| 1.56, 1.59                                                                                                       | 3.01        |

Chemical structure of **26c** is shown above the spectrum. The structure is a benzimidazole derivative with a methoxy group and a chiral amine side chain.

**1H NMR spectrum (DMSO-d<sub>6</sub>) data:**

| Chemical Shift (ppm) | Integration |
|----------------------|-------------|
| 189.57               | 1.00        |
| 151.95               | 1.00        |
| 143.29               | 1.00        |
| 131.74               | 1.00        |
| 130.93               | 1.00        |
| 126.18               | 1.00        |
| 124.74               | 1.00        |
| 120.89               | 1.00        |
| 113.08               | 1.00        |
| 56.26                | 1.00        |
| 51.91                | 1.00        |
| 39.50                | 1.00        |
| 16.56                | 1.00        |

Compound **26d** ( $^1\text{H}$  NMR, 400 MHz):

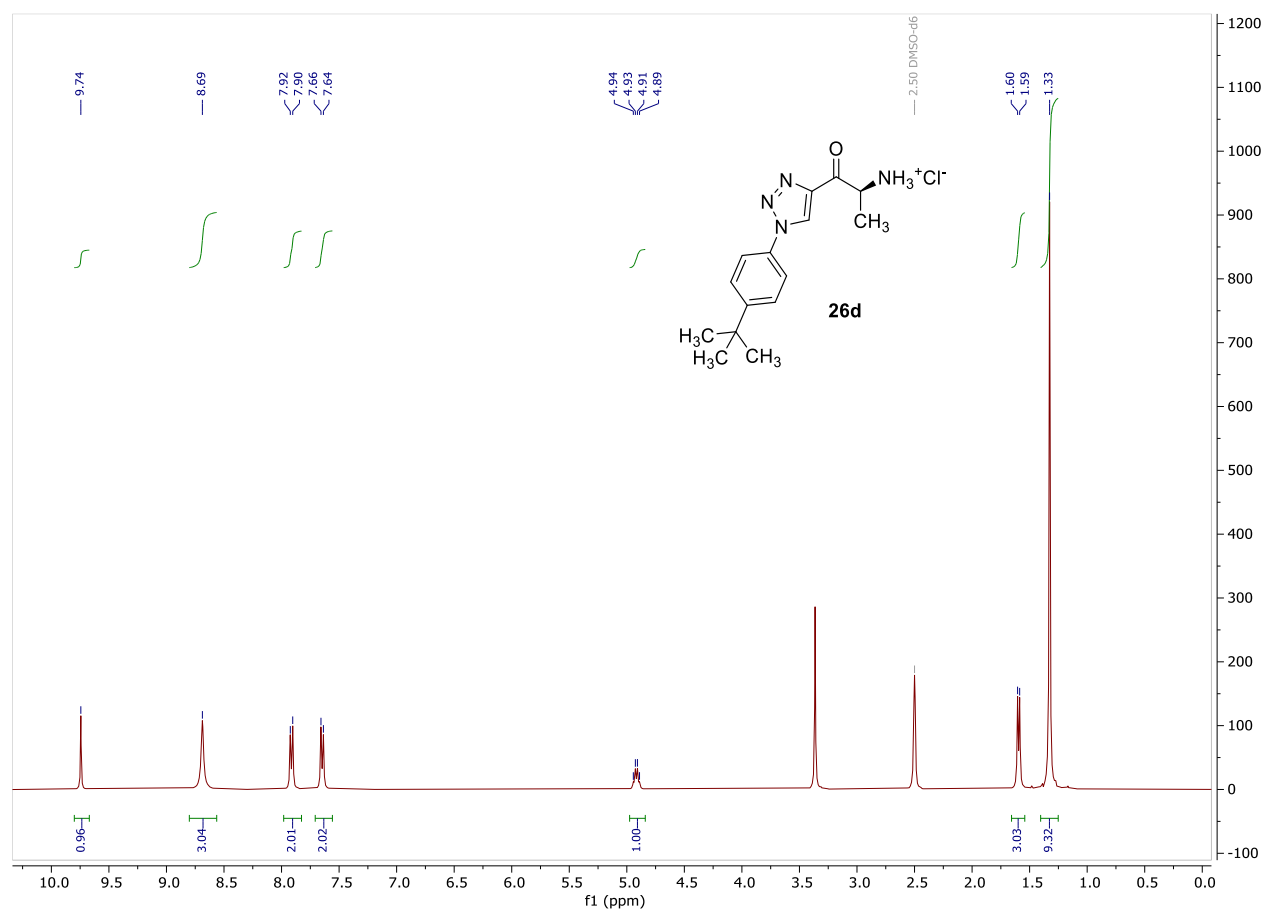

Compound **26d** ( $^{13}\text{C}$  NMR, 101 MHz):

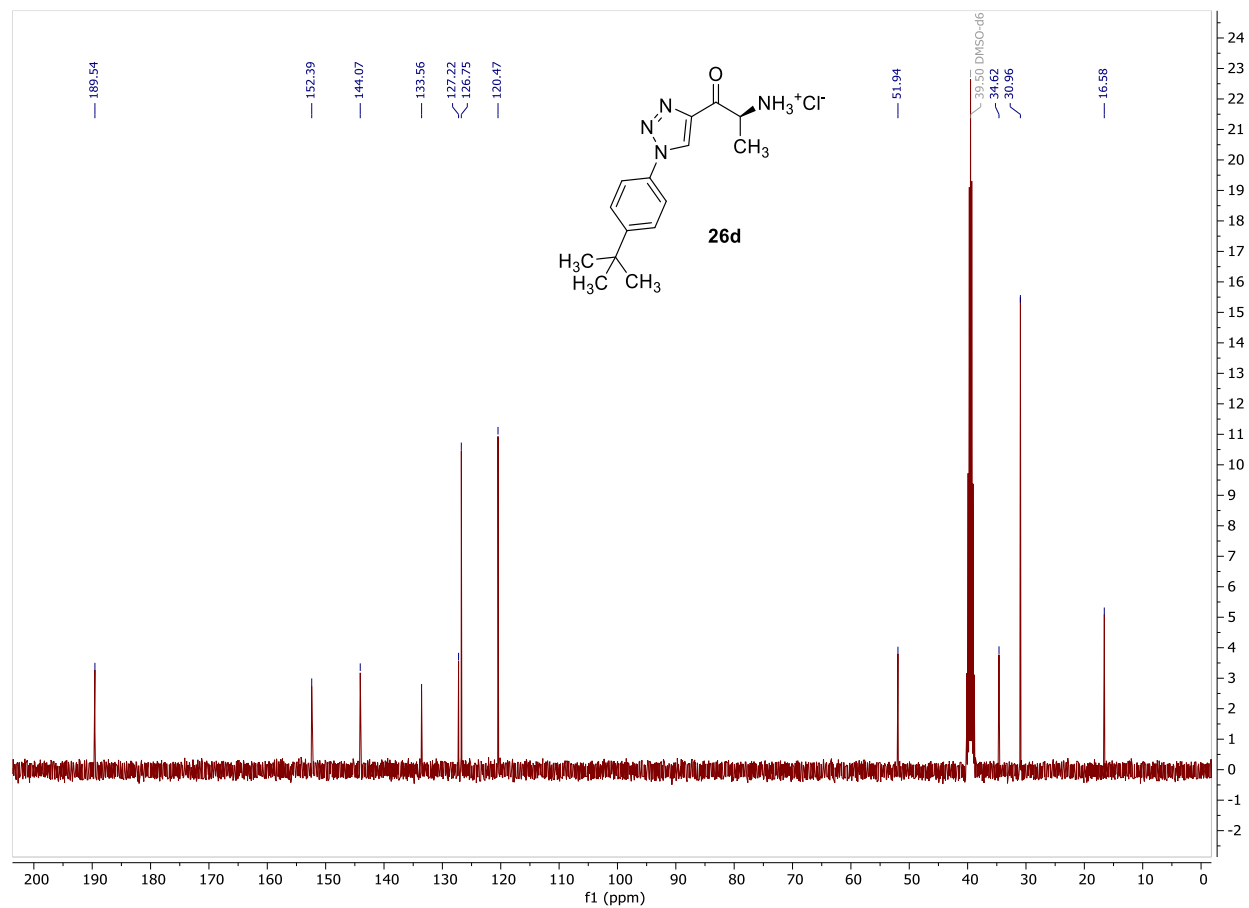

Compound **26e** ( $^1\text{H}$  NMR, 400 MHz):

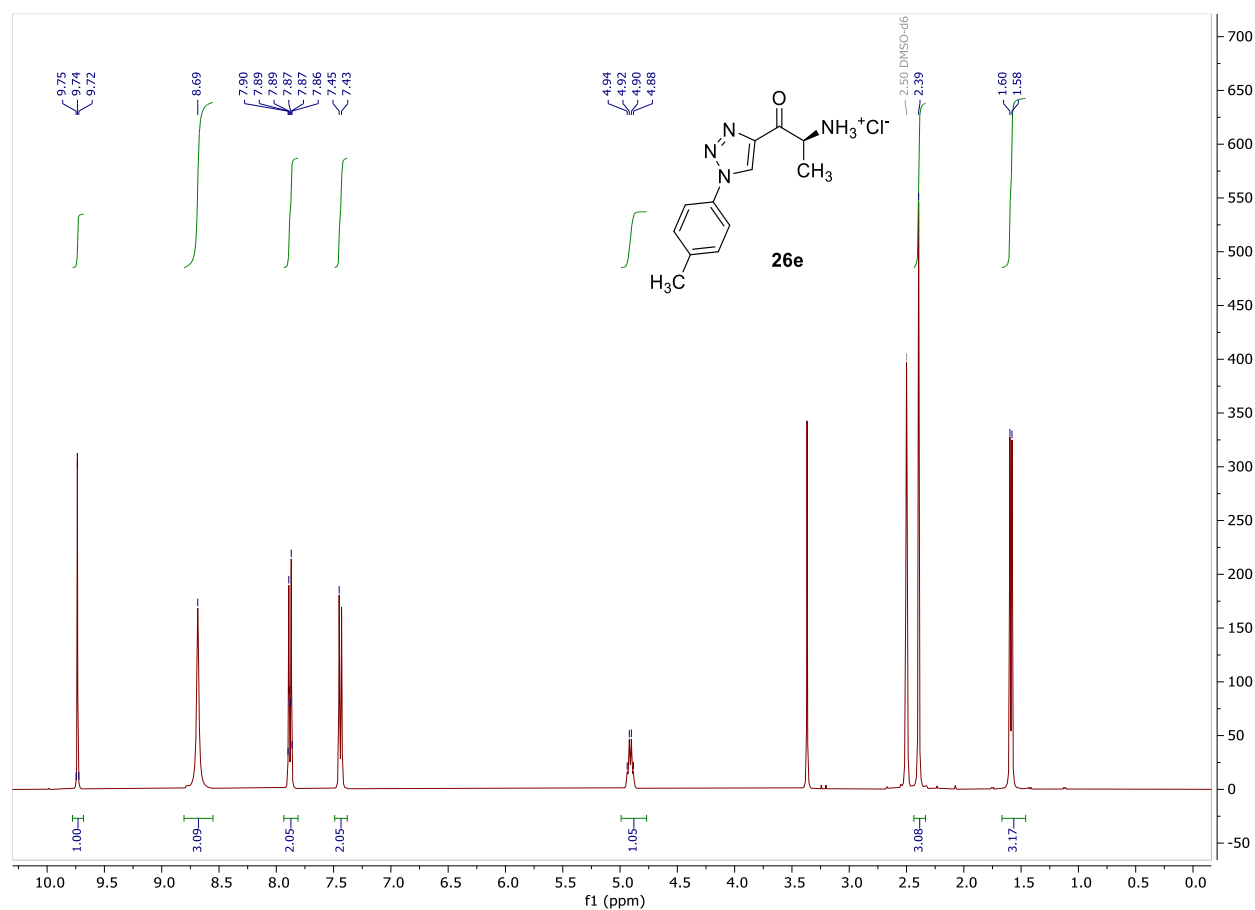

Compound **26e** ( $^{13}\text{C}$  NMR, 101 MHz):

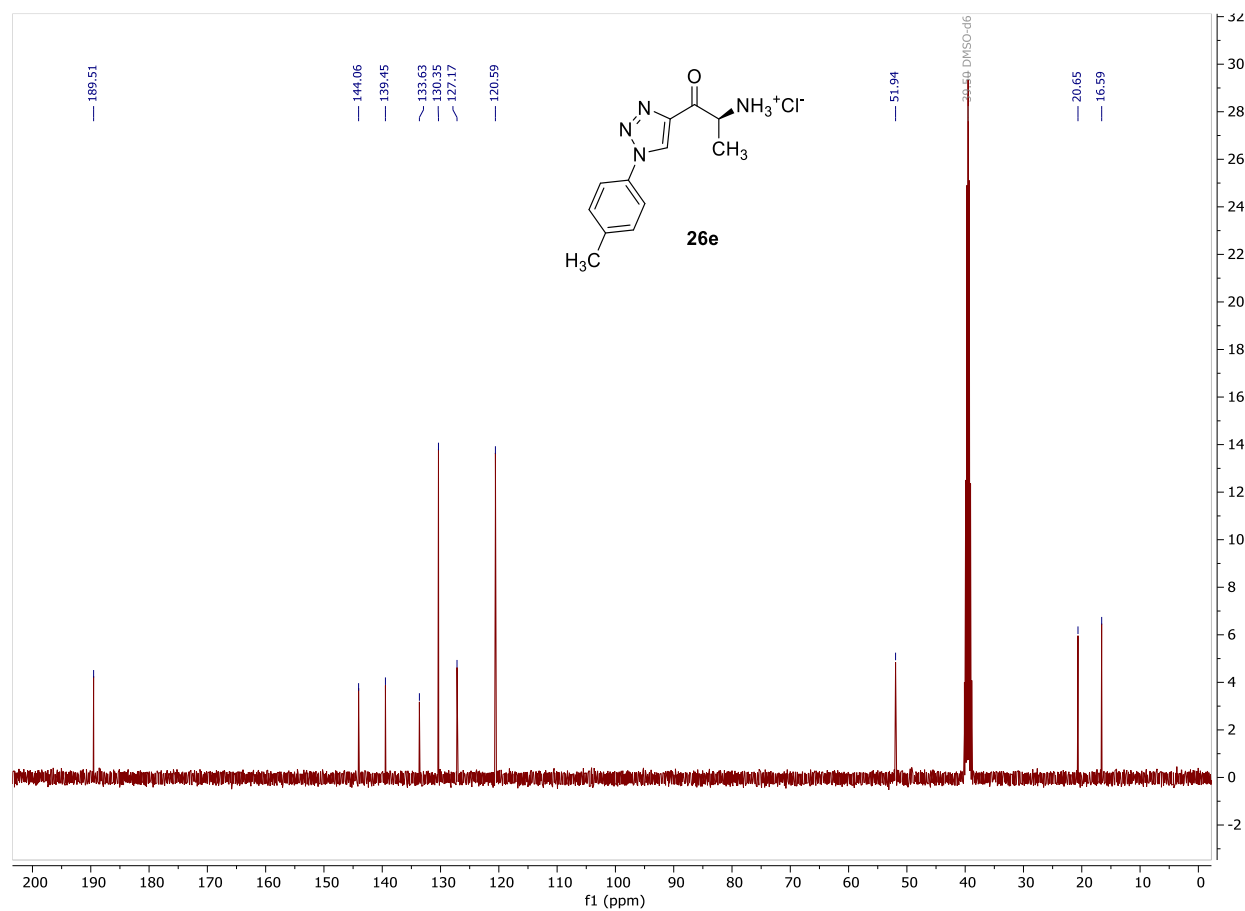

Compound **26f** ( $^1\text{H}$  NMR, 400 MHz):

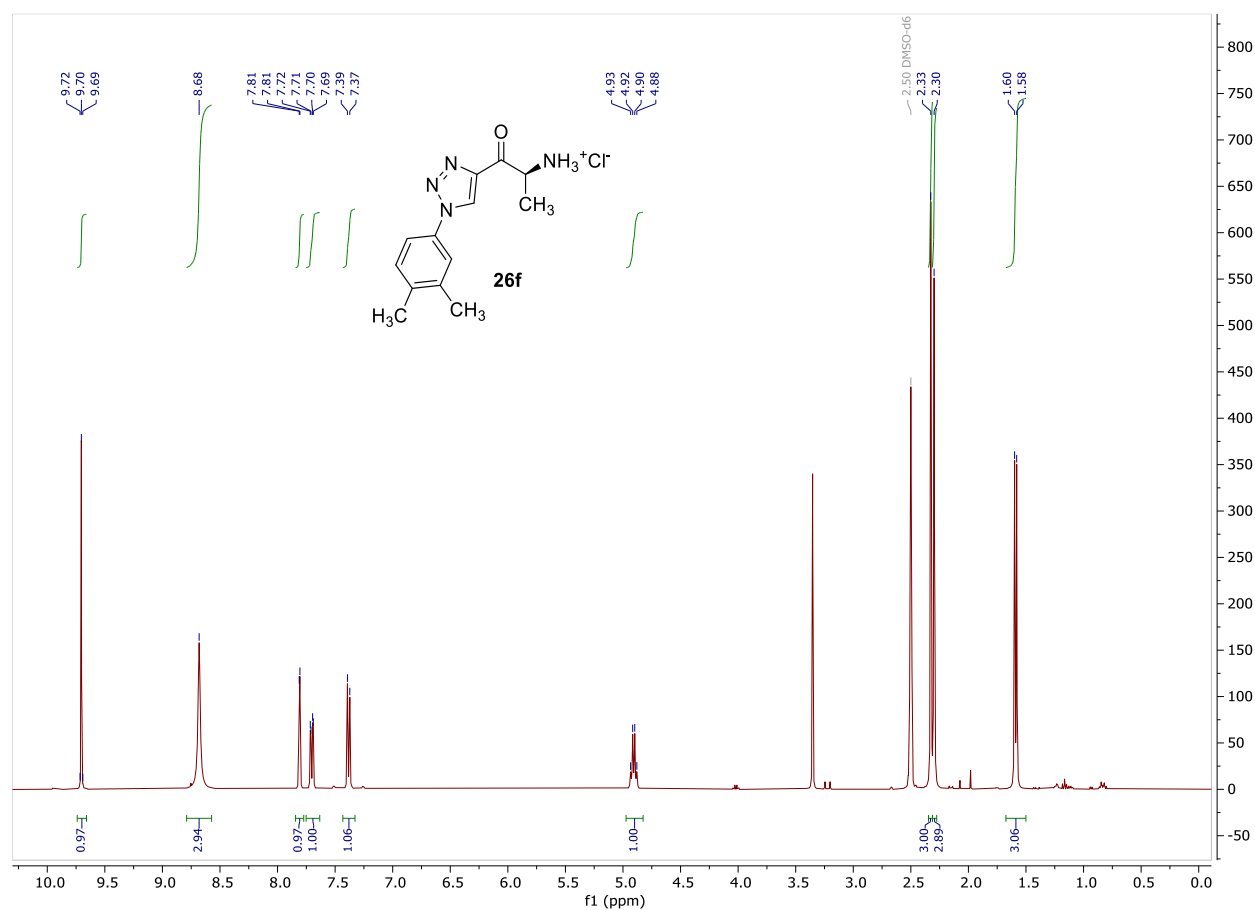

Compound **26f** ( $^{13}\text{C}$  NMR, 101 MHz):

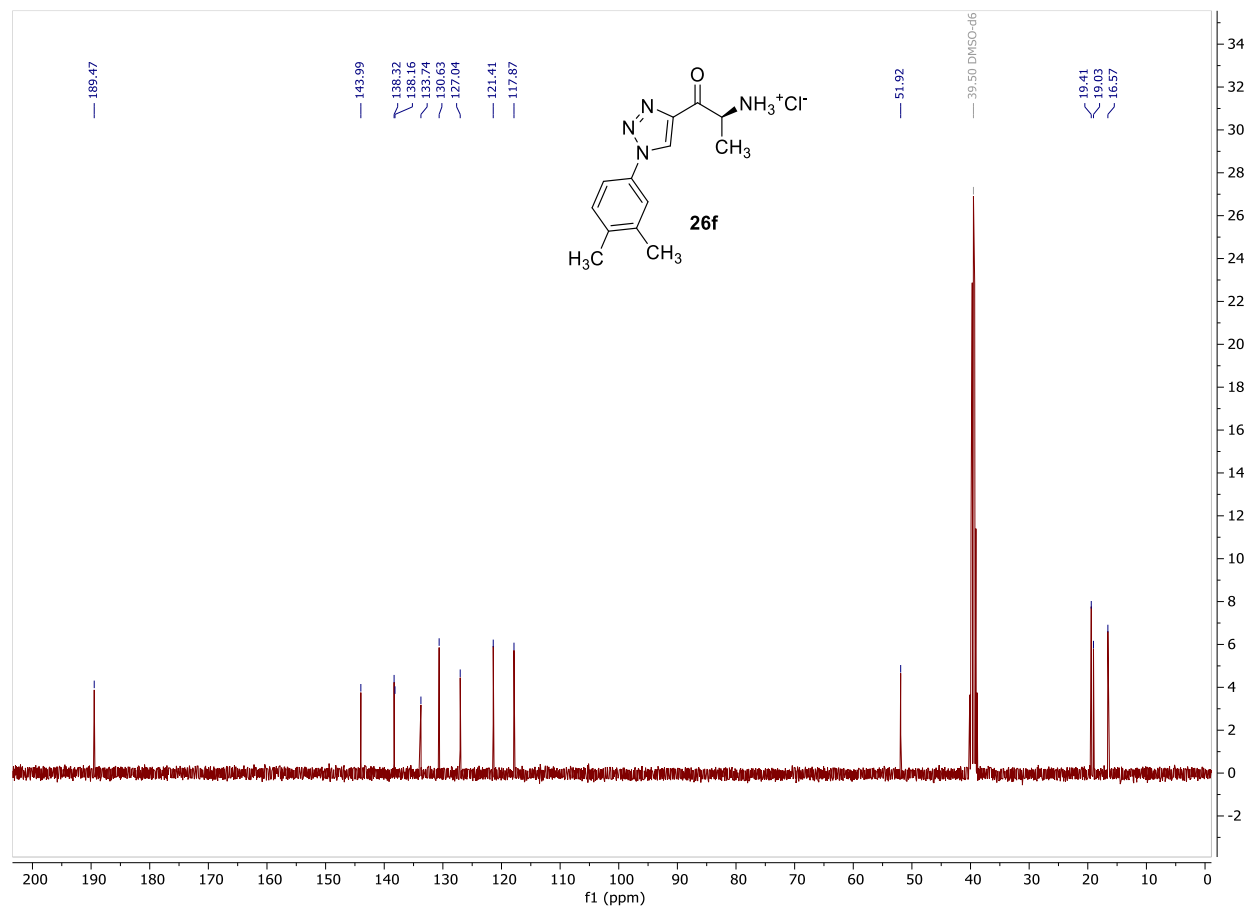



Compound **26g** ( $^1\text{H}$  NMR, 400 MHz):

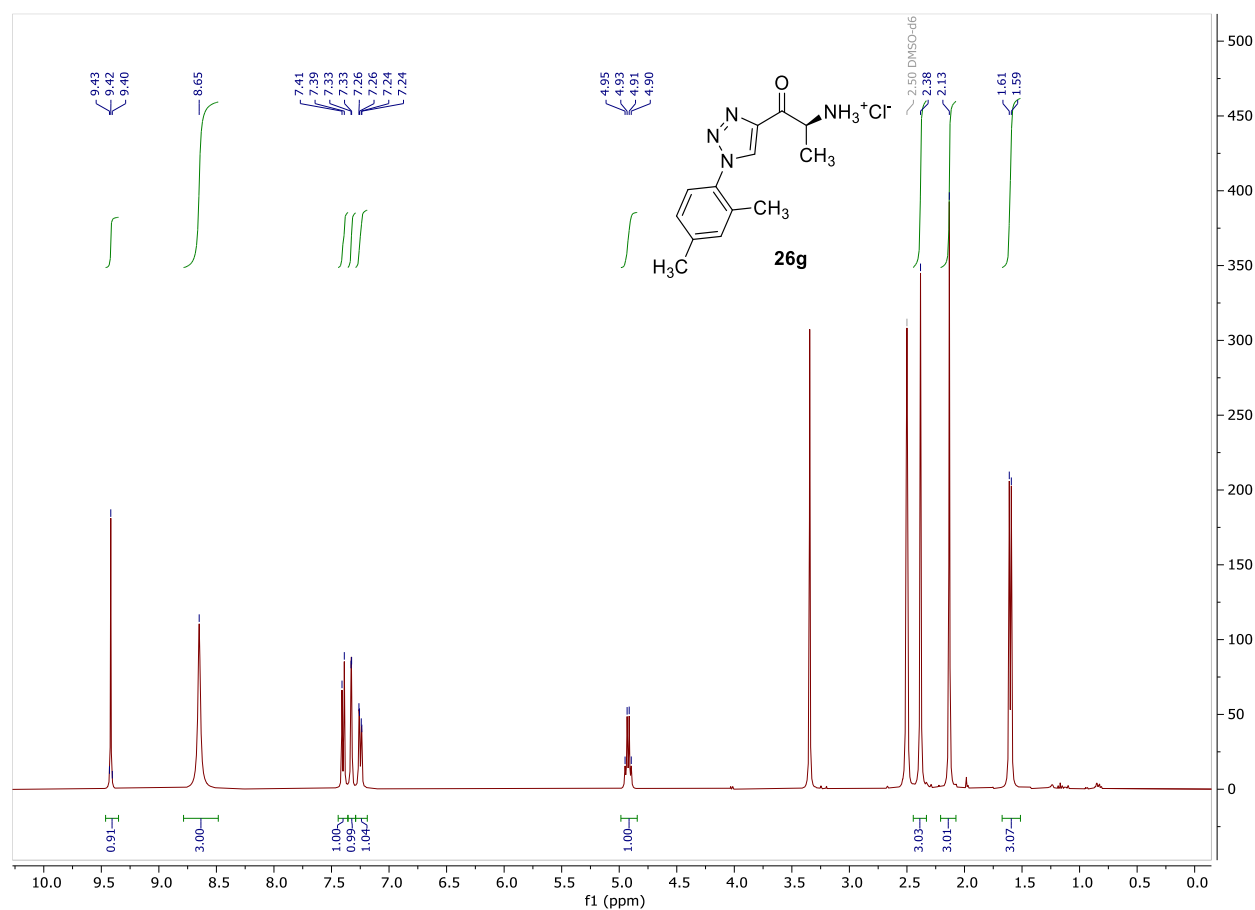

Compound **26g** ( $^{13}\text{C}$  NMR, 101 MHz):

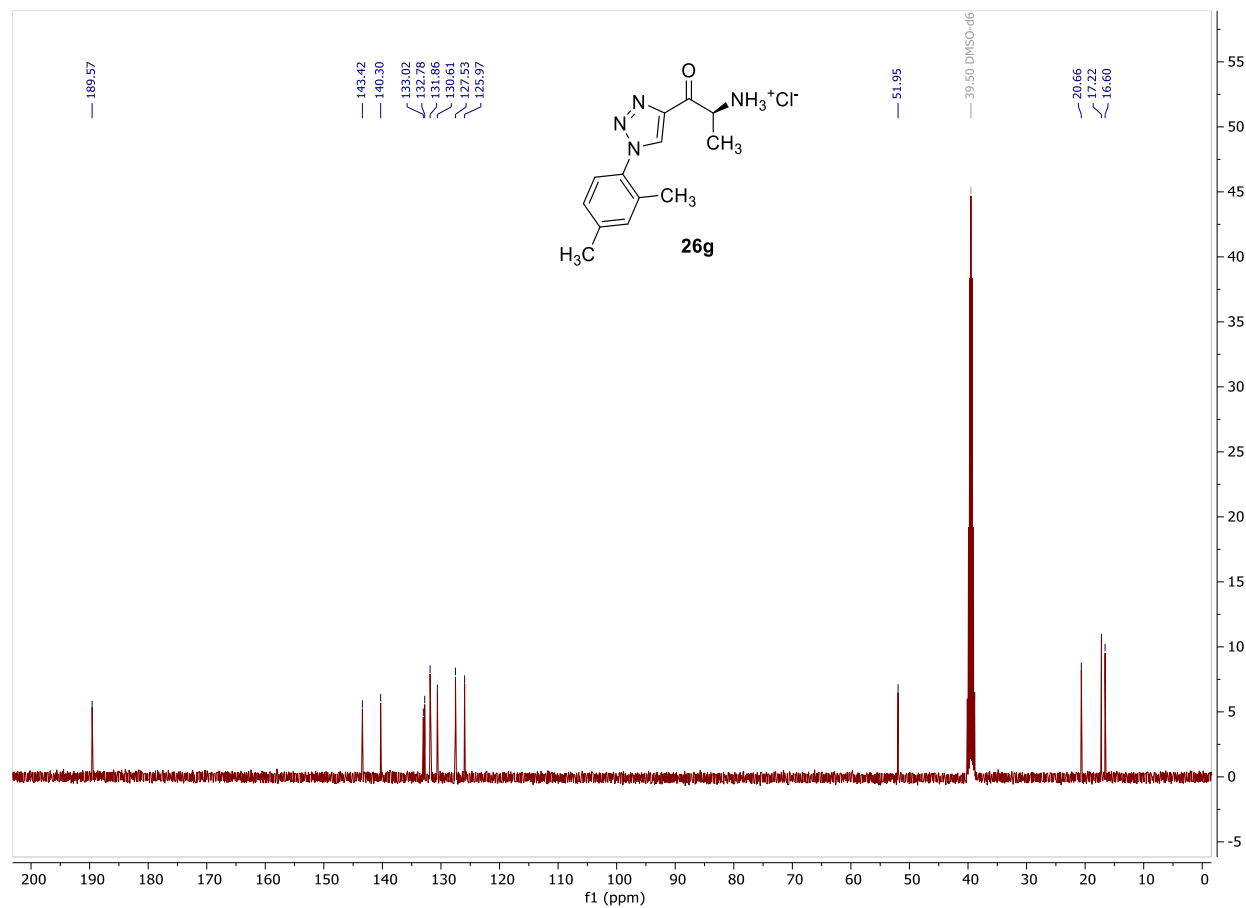

Compound **26h** ( $^1\text{H}$  NMR, 400 MHz):

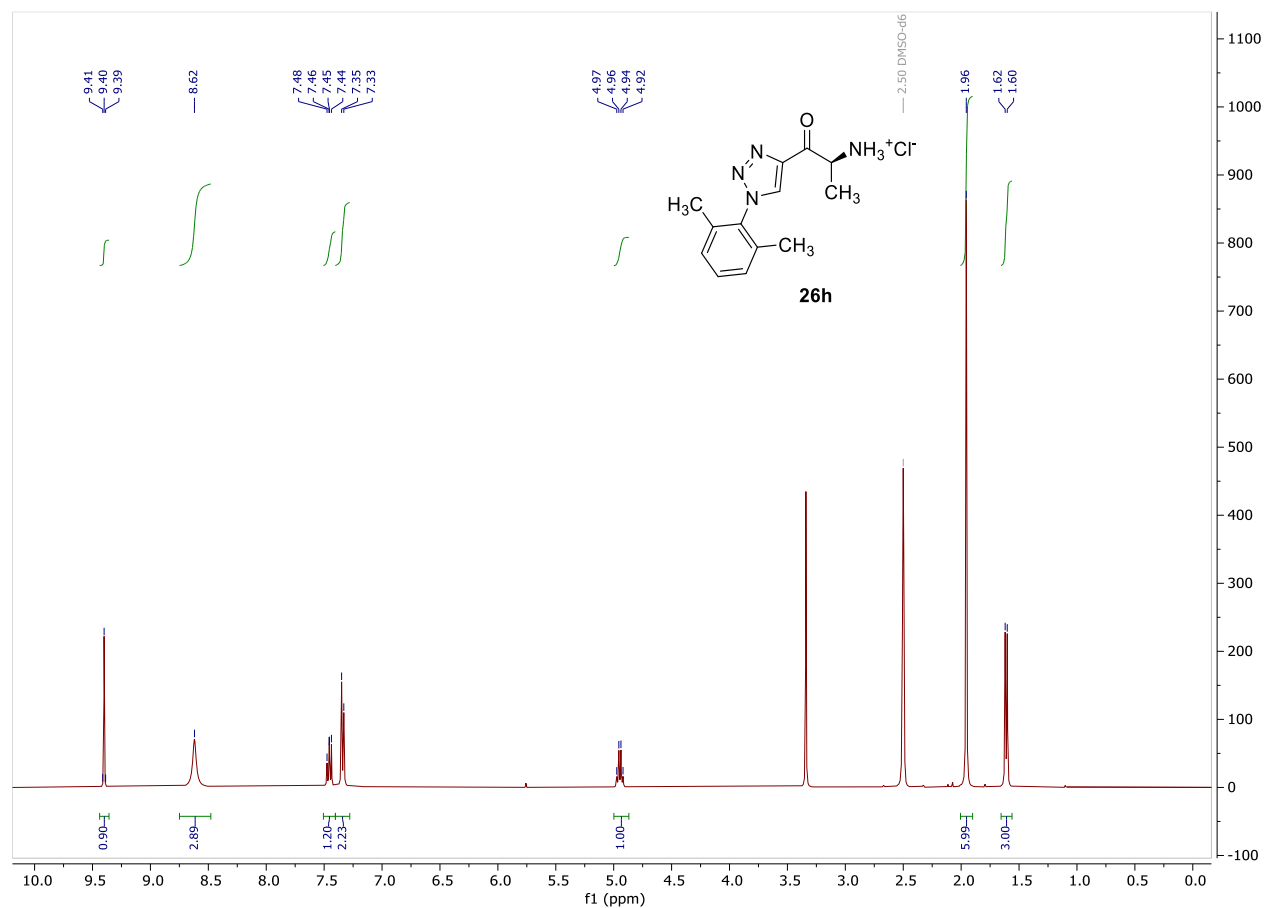

Compound **26h** ( $^{13}\text{C}$  NMR, 101 MHz):

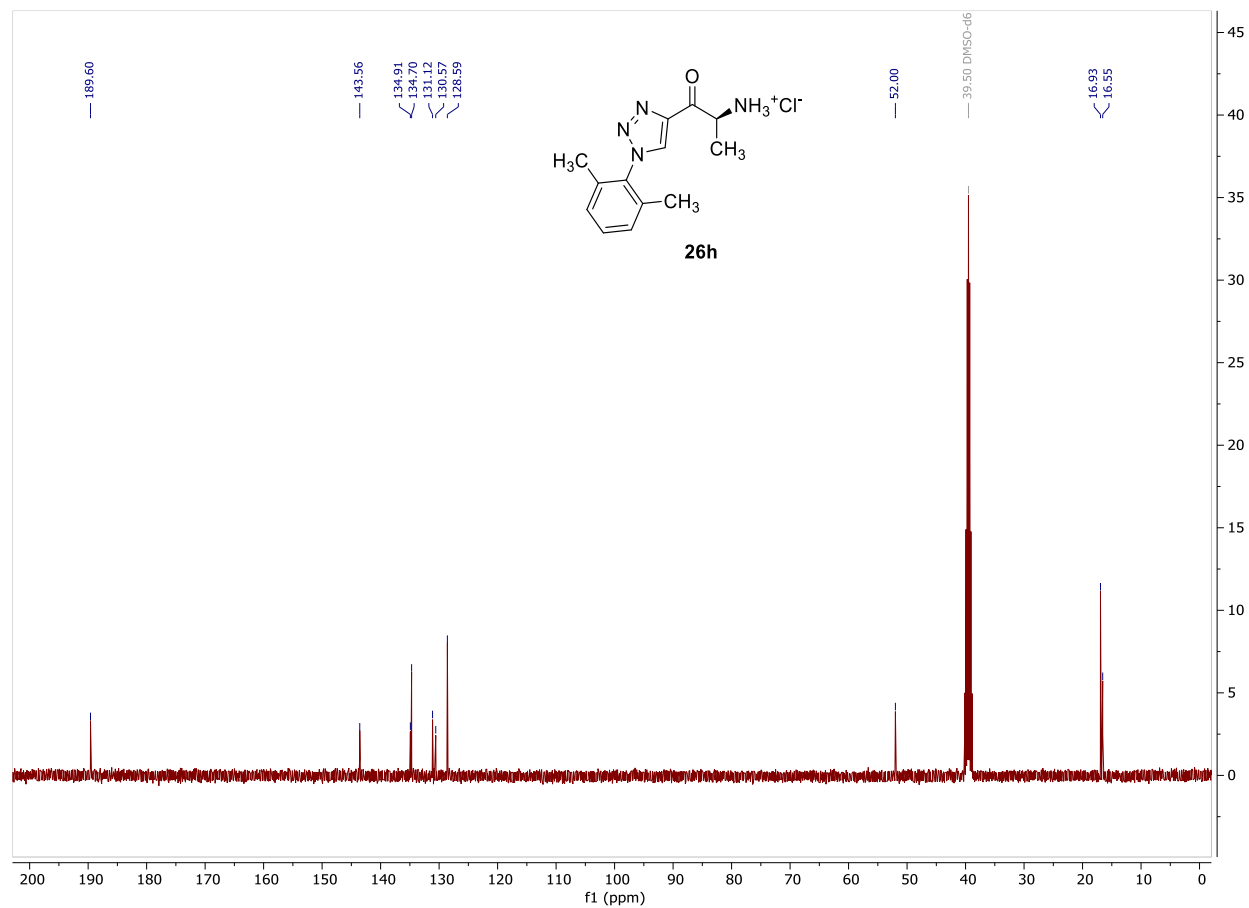

Compound **26i** ( $^1\text{H}$  NMR, 400 MHz):

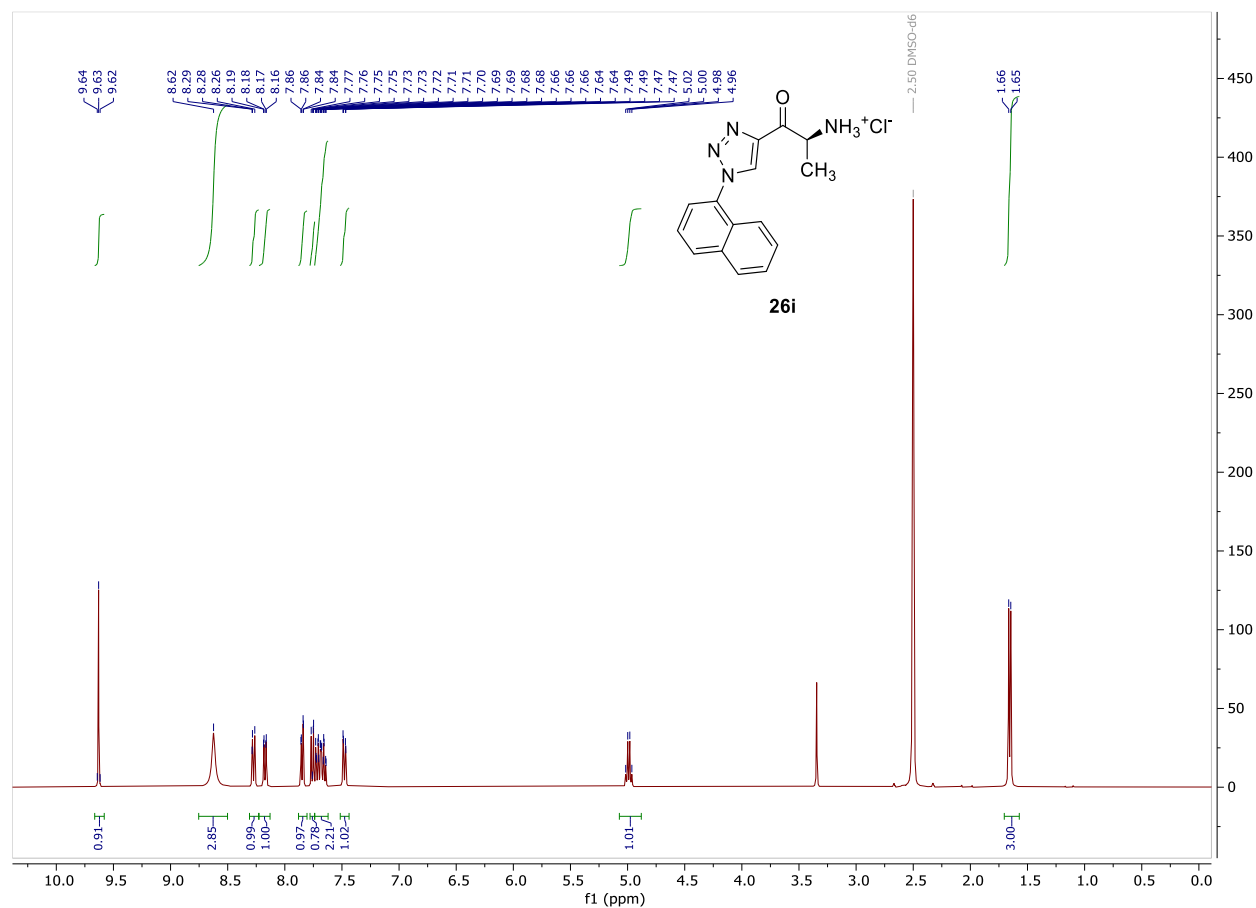

Compound **26i** ( $^{13}\text{C}$  NMR, 101 MHz):

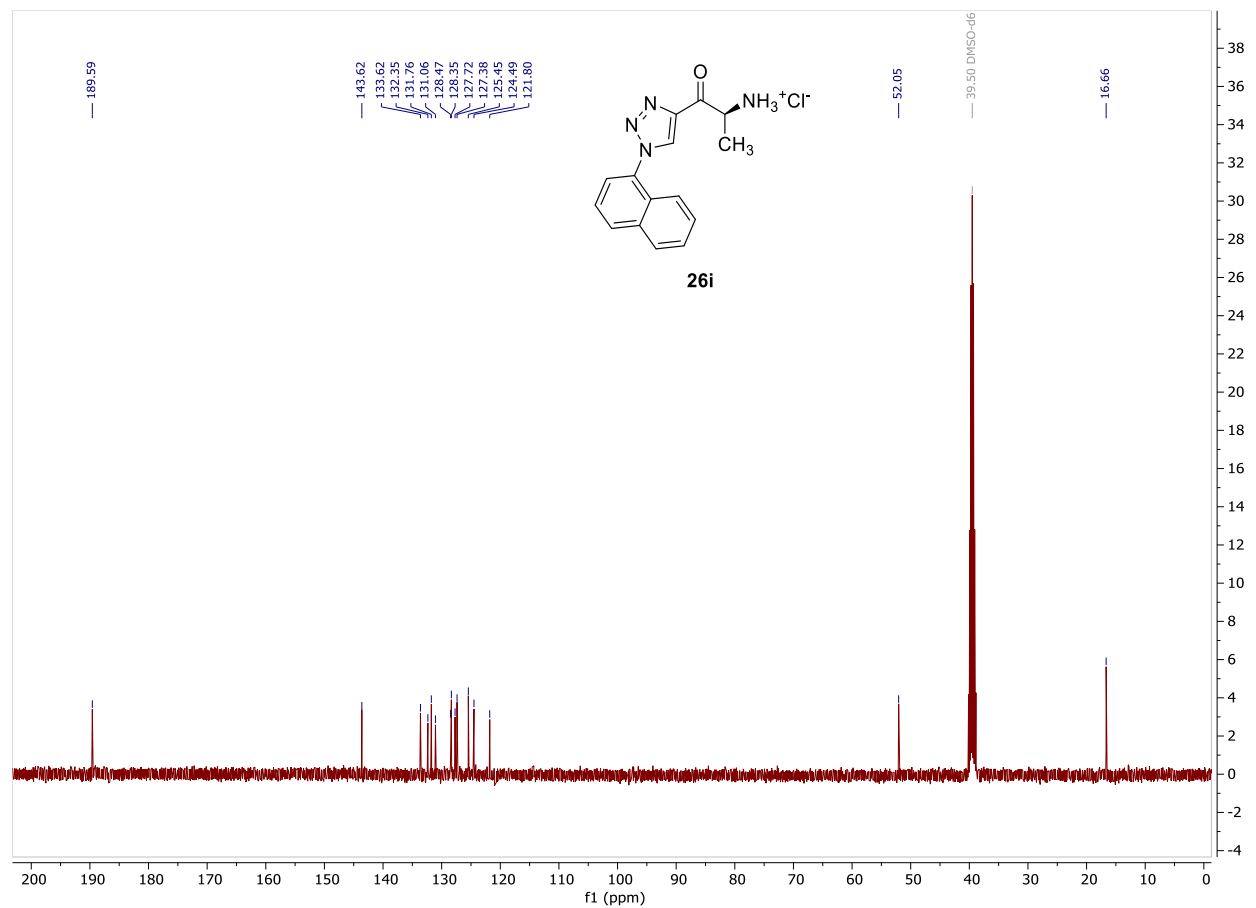

Compound **26j** ( $^1\text{H}$  NMR, 400 MHz):

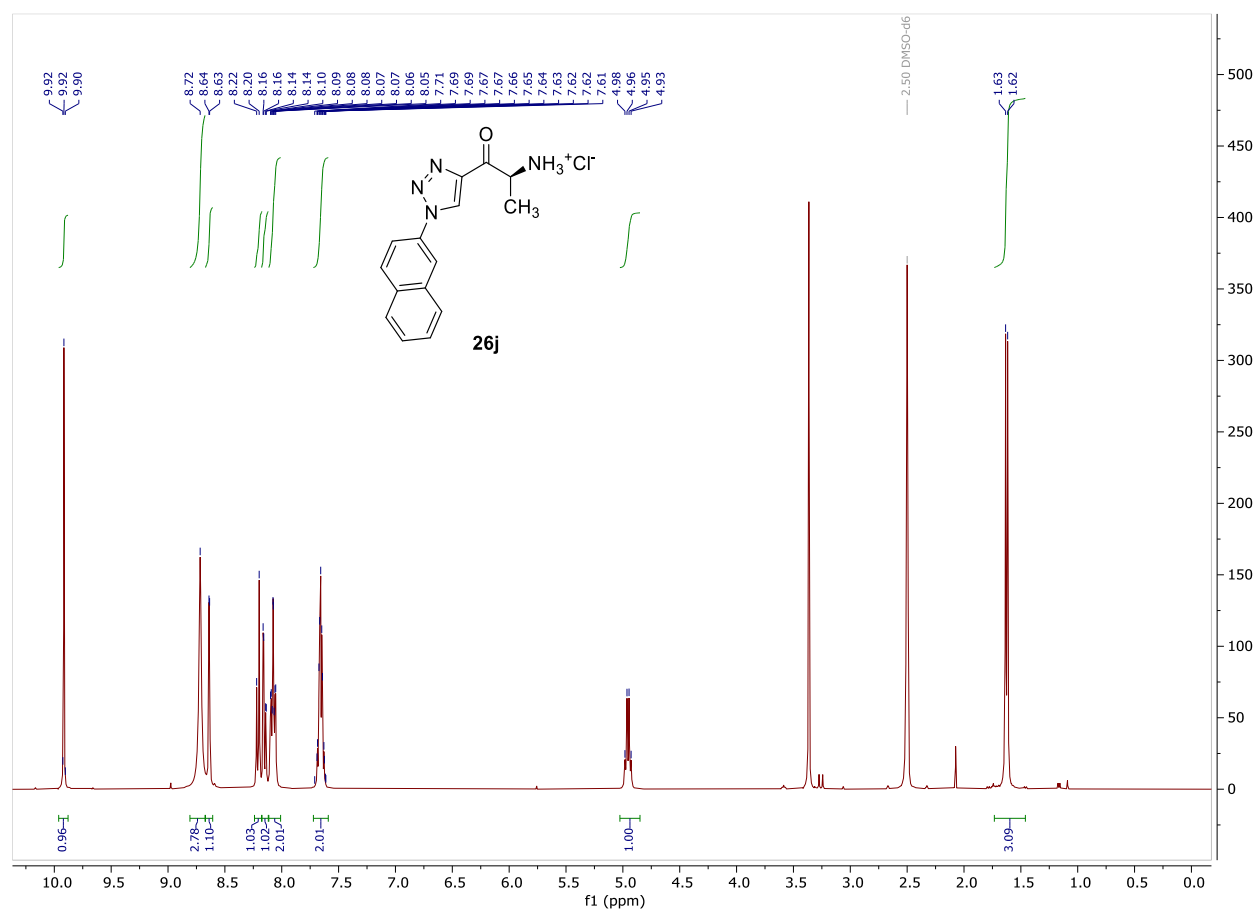

Compound **26j** ( $^{13}\text{C}$  NMR, 101 MHz):

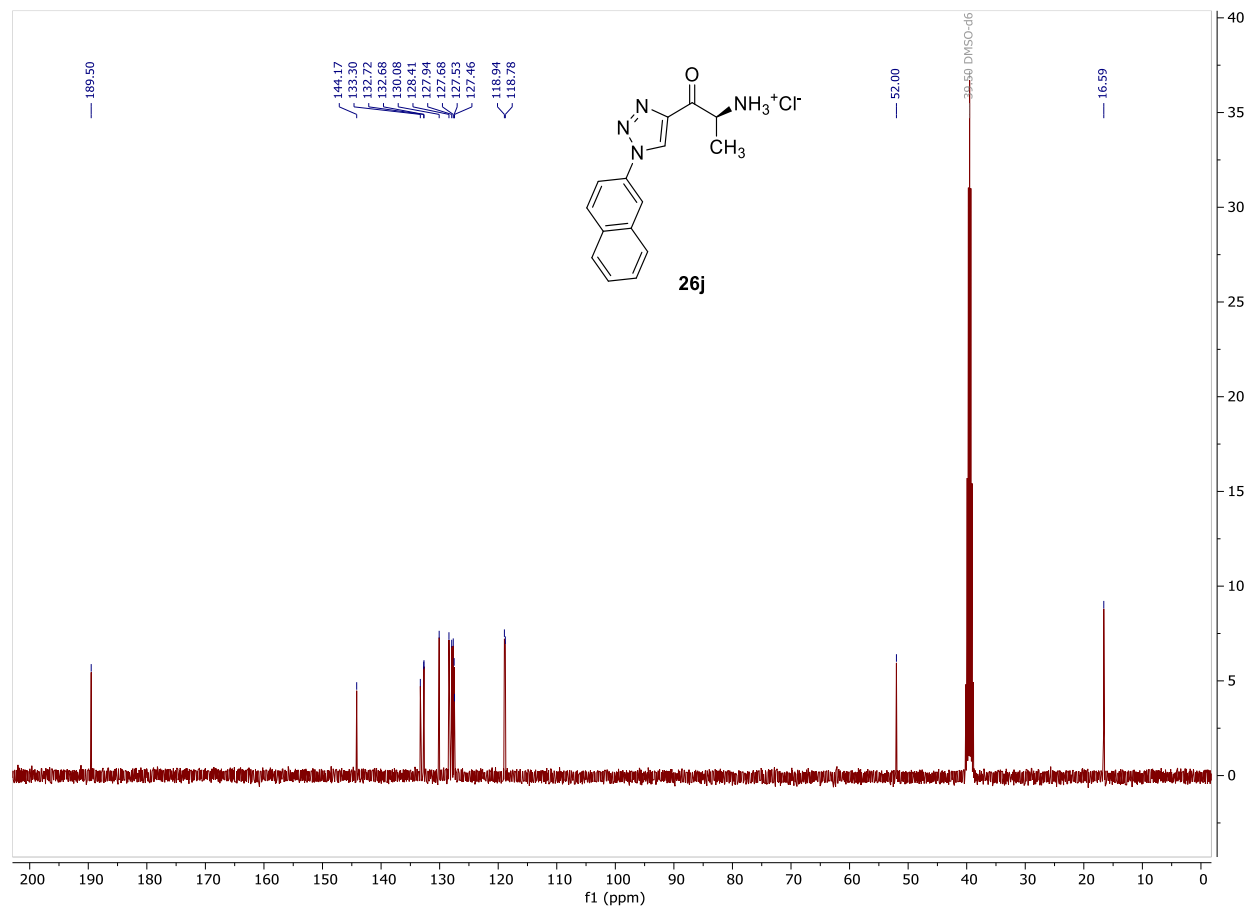

Compound **26k** ( $^1\text{H}$  NMR, 400 MHz):

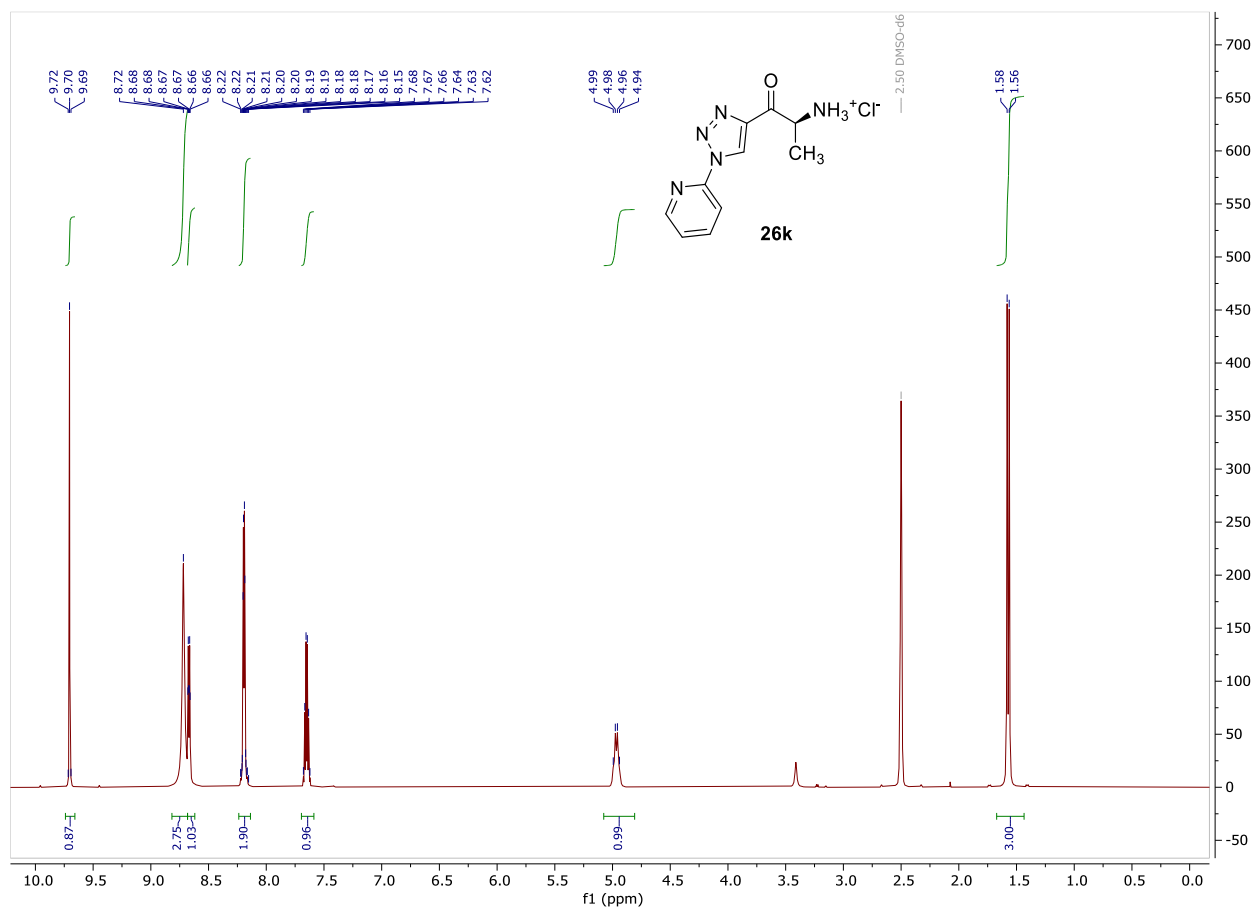

Compound **26k** ( $^{13}\text{C}$  NMR, 101 MHz):

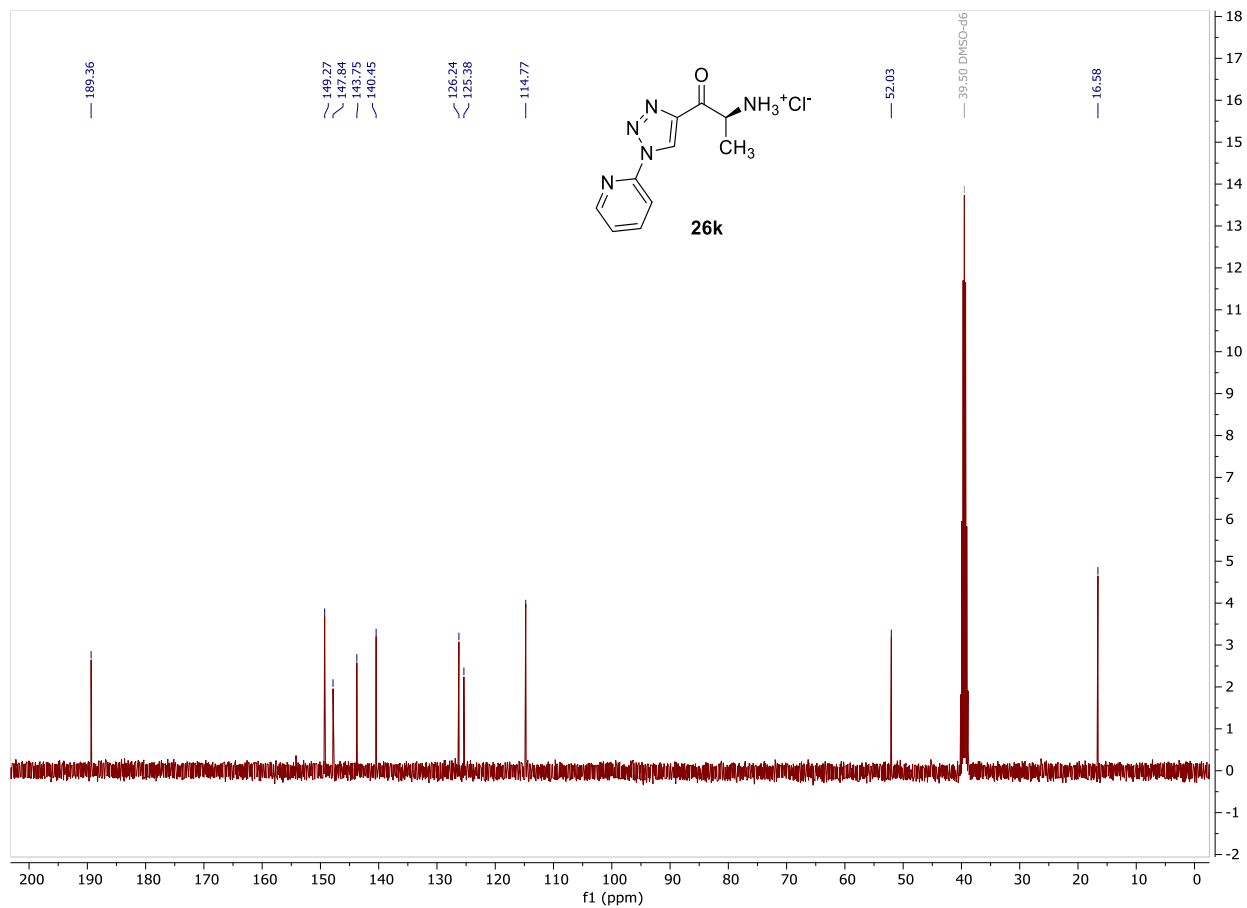

Compound **26l** ( $^1\text{H}$  NMR, 400 MHz):

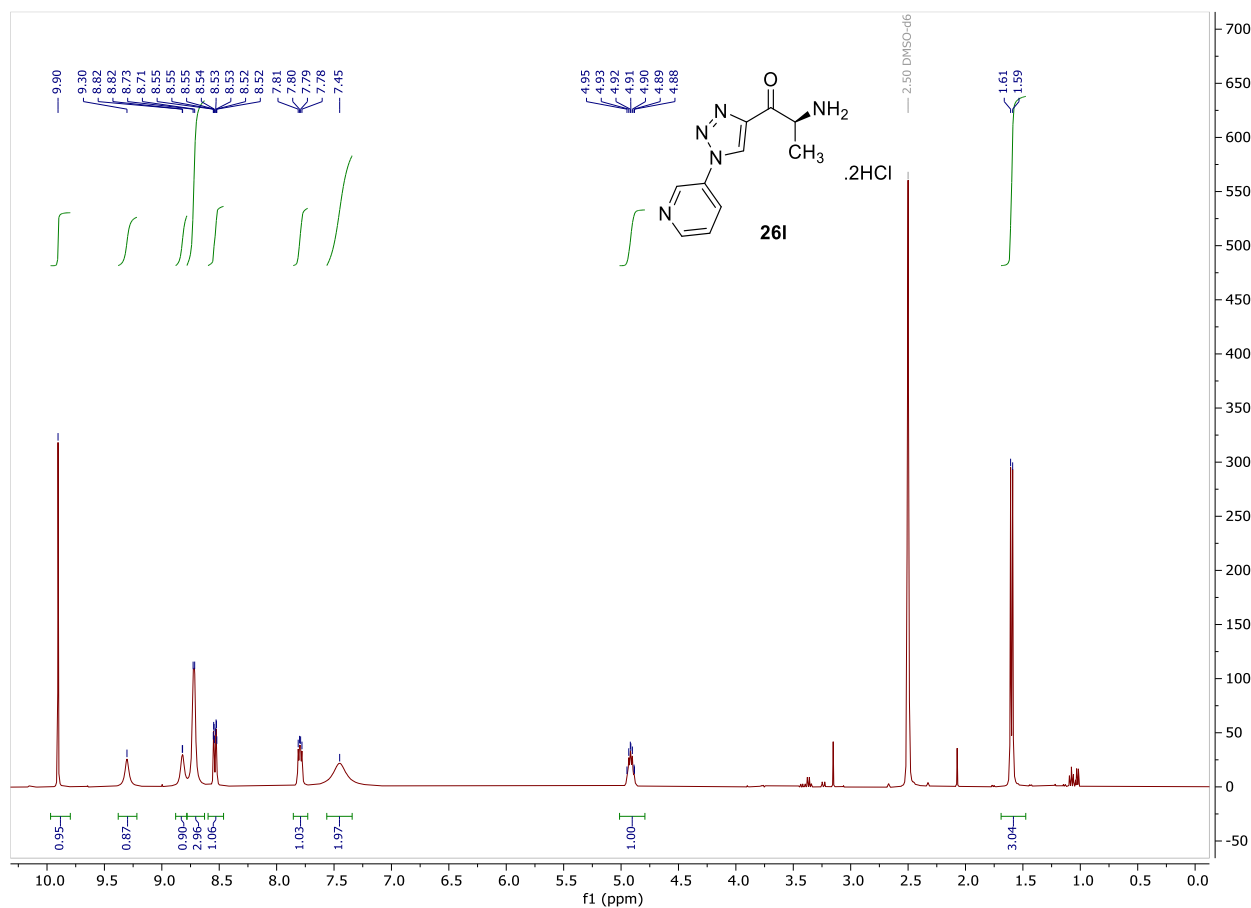

Compound **26l** ( $^{13}\text{C}$  NMR, 101 MHz):

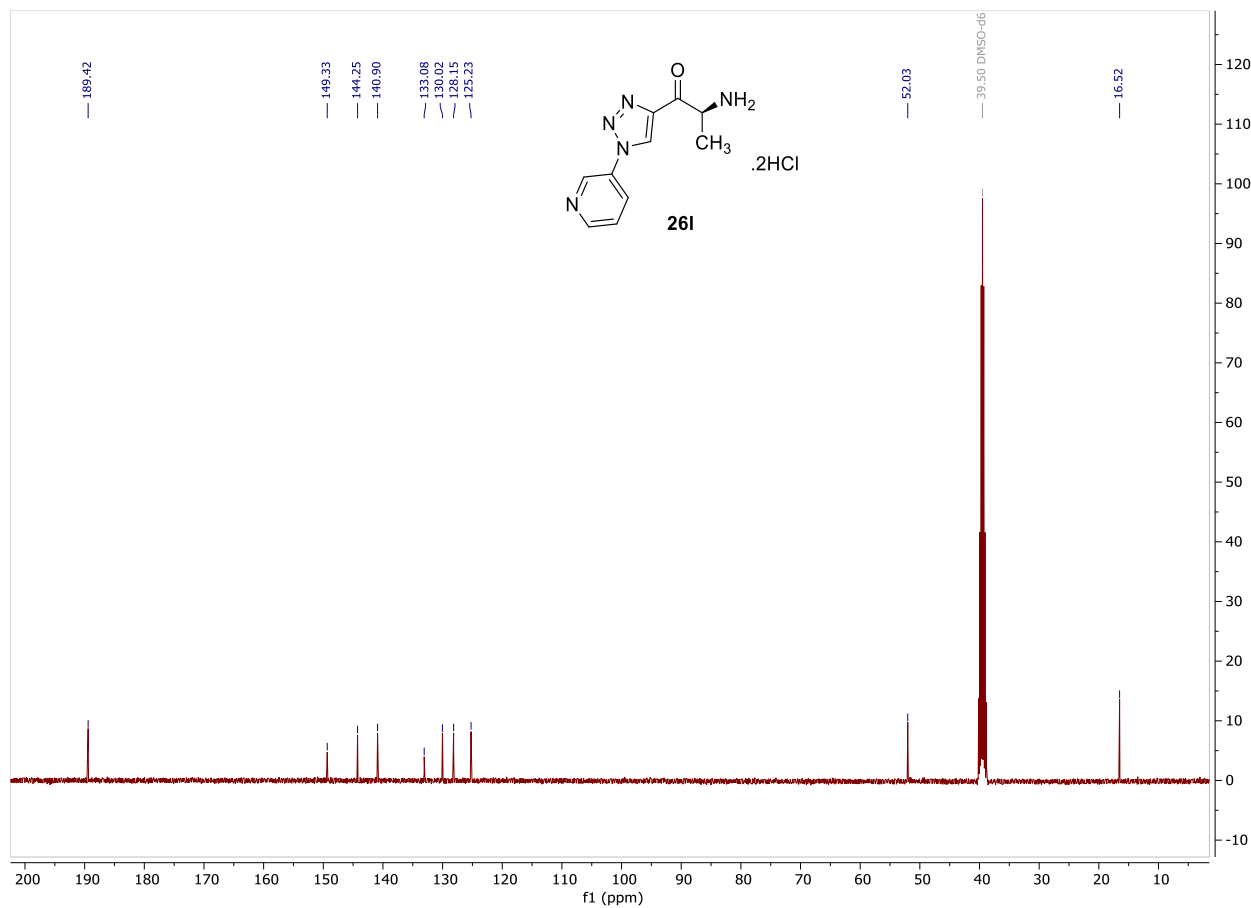

Compound **26m** ( $^1\text{H}$  NMR, 400 MHz):

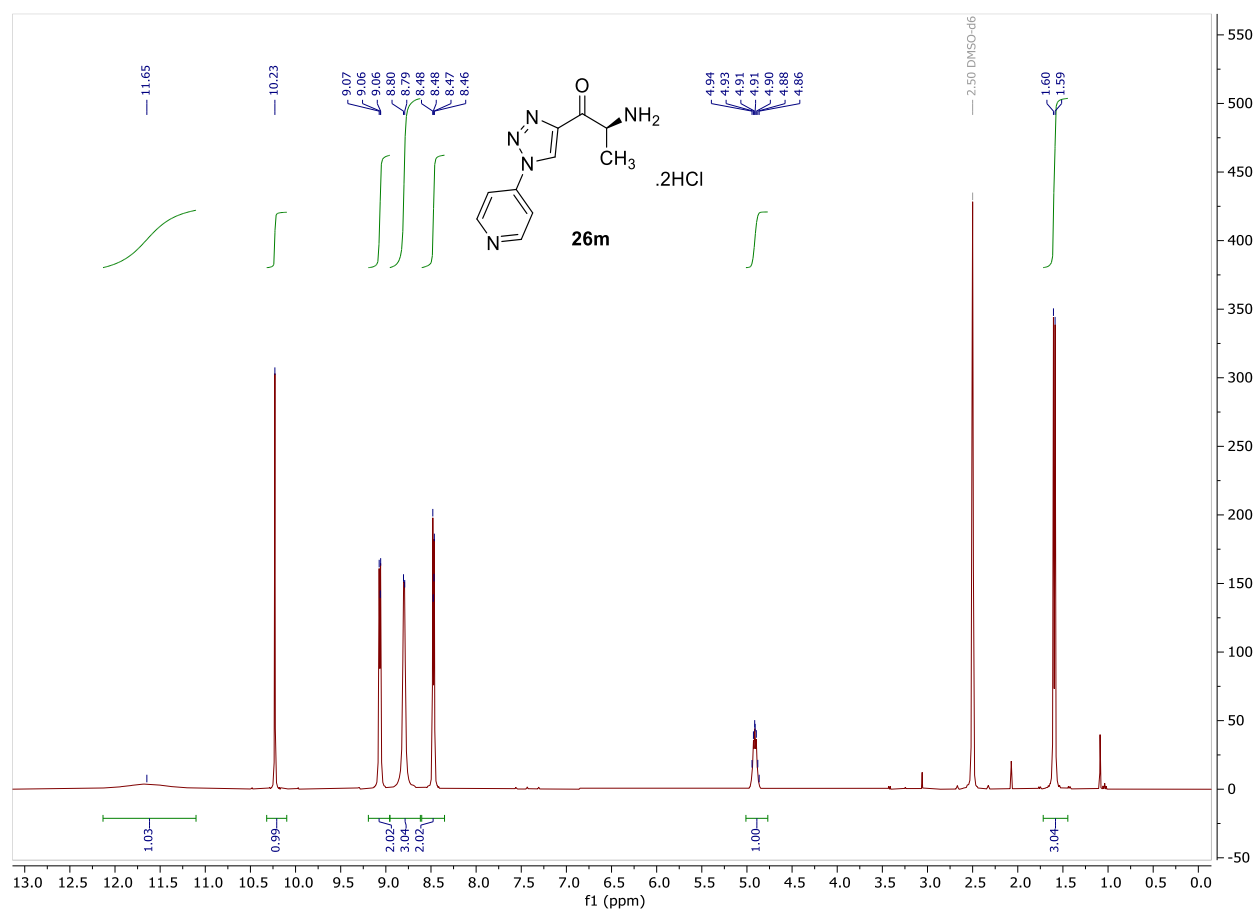

Compound **26m** ( $^{13}\text{C}$  NMR, 101 MHz):

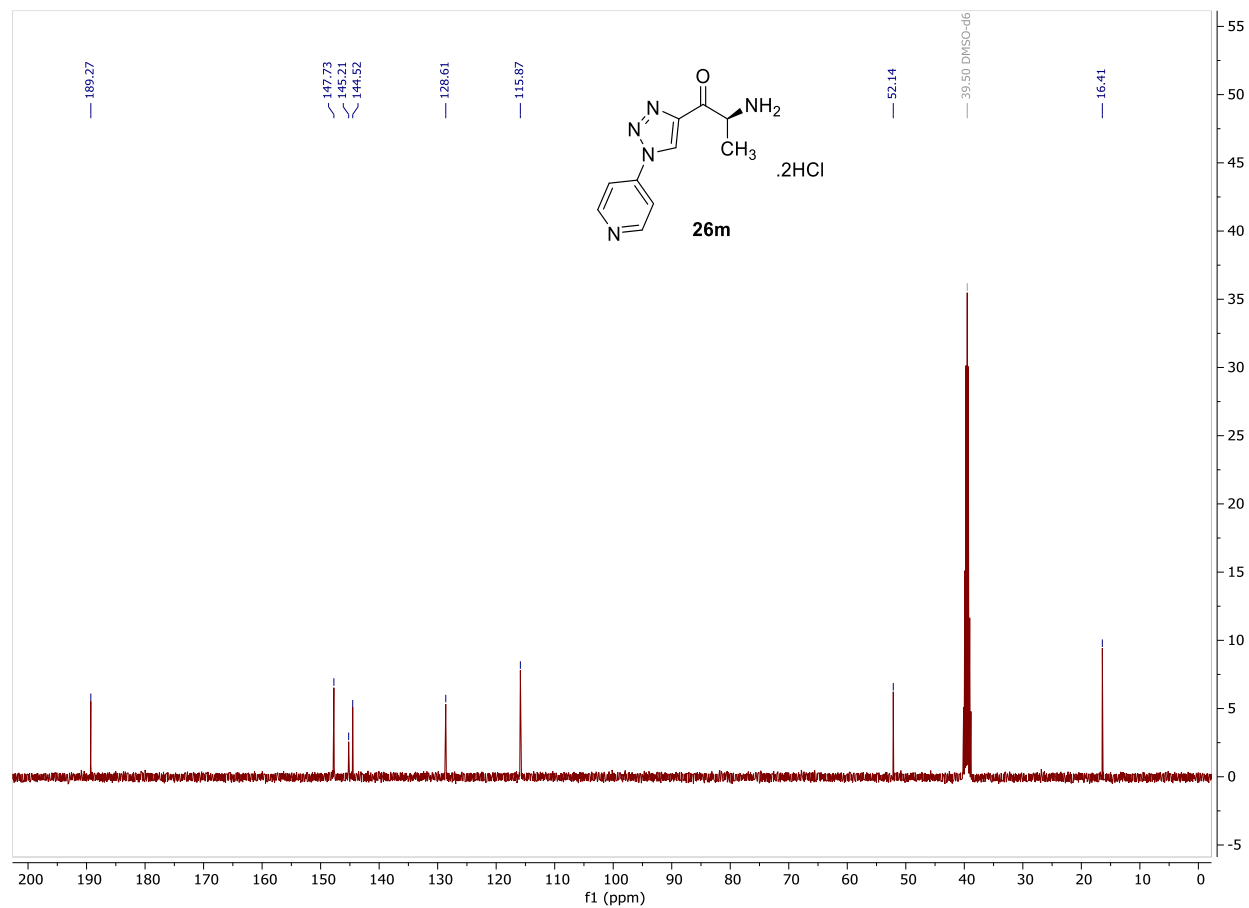

Compound **26n** ( $^1\text{H}$  NMR, 400 MHz):

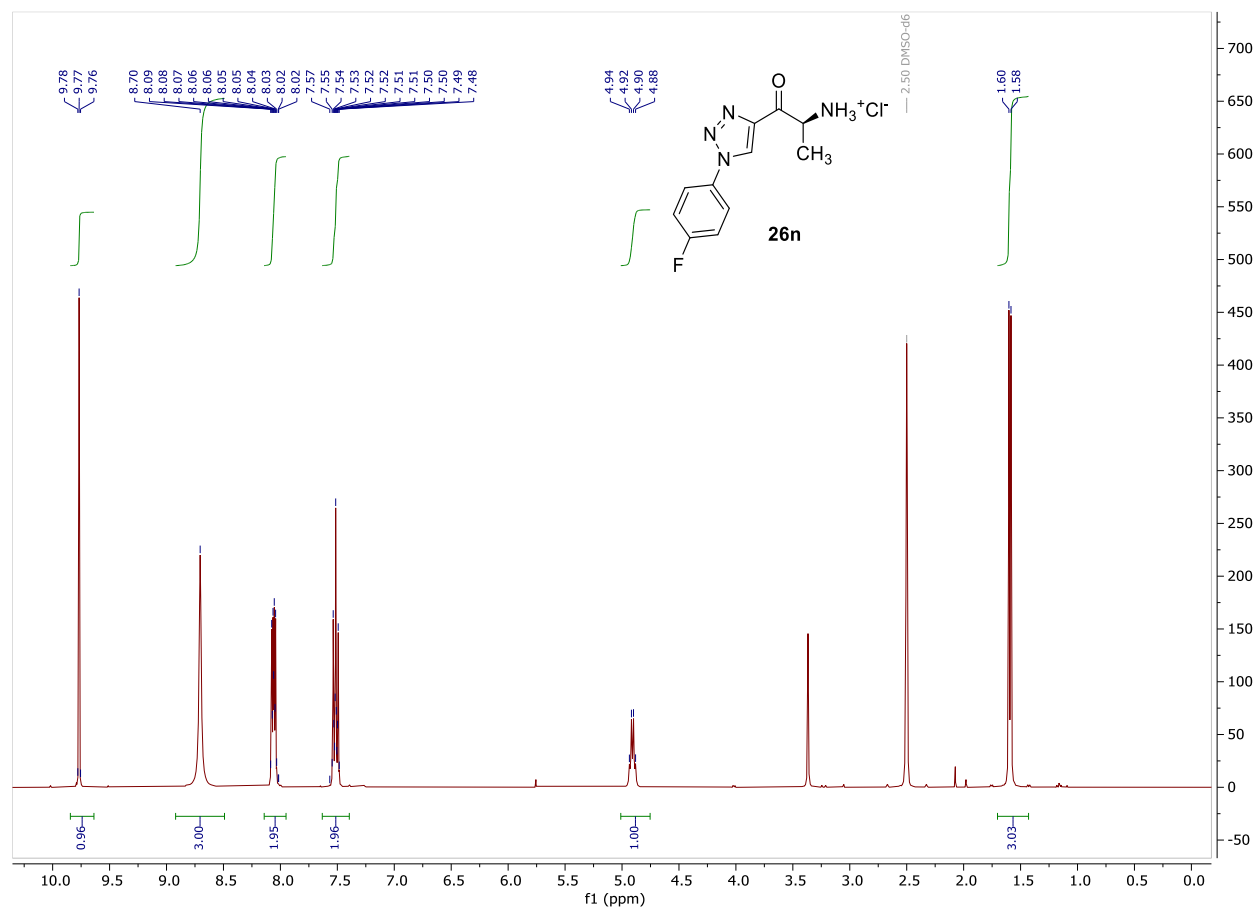

Compound **26n** ( $^{13}\text{C}$  NMR, 101 MHz):

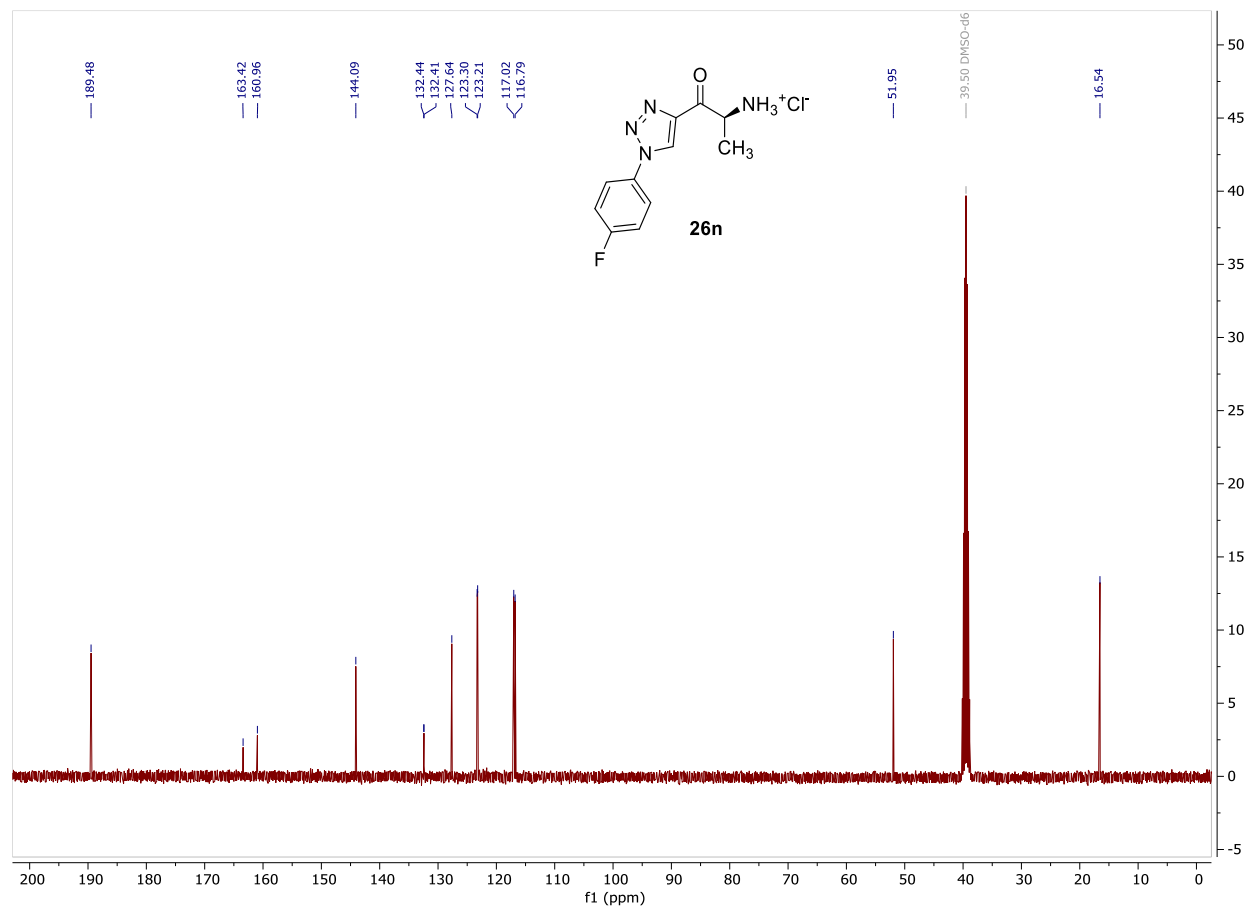



Compound **26n** ( $^{19}\text{F}$  NMR, 282 MHz):

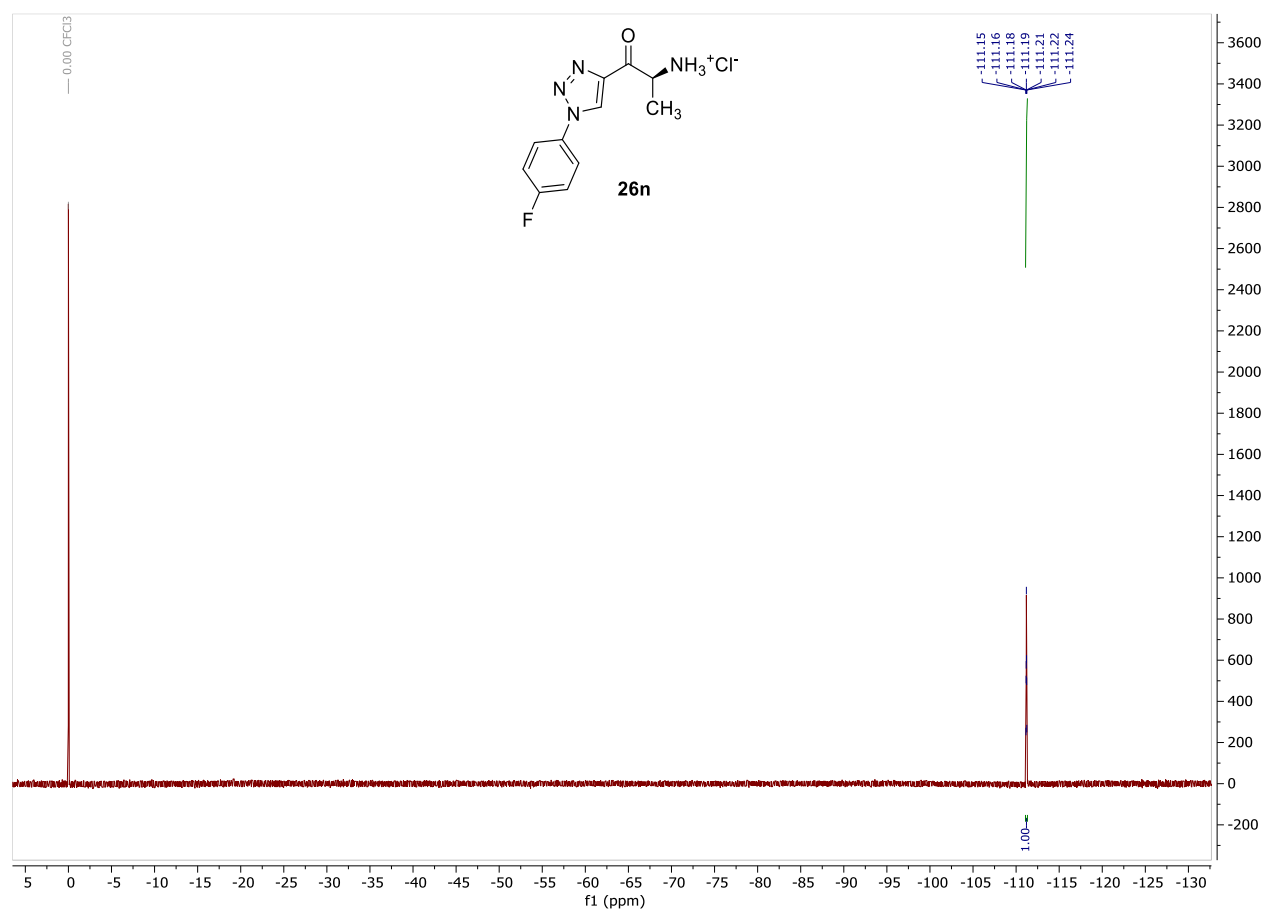

Compound **26o** ( $^1\text{H}$  NMR, 400 MHz):

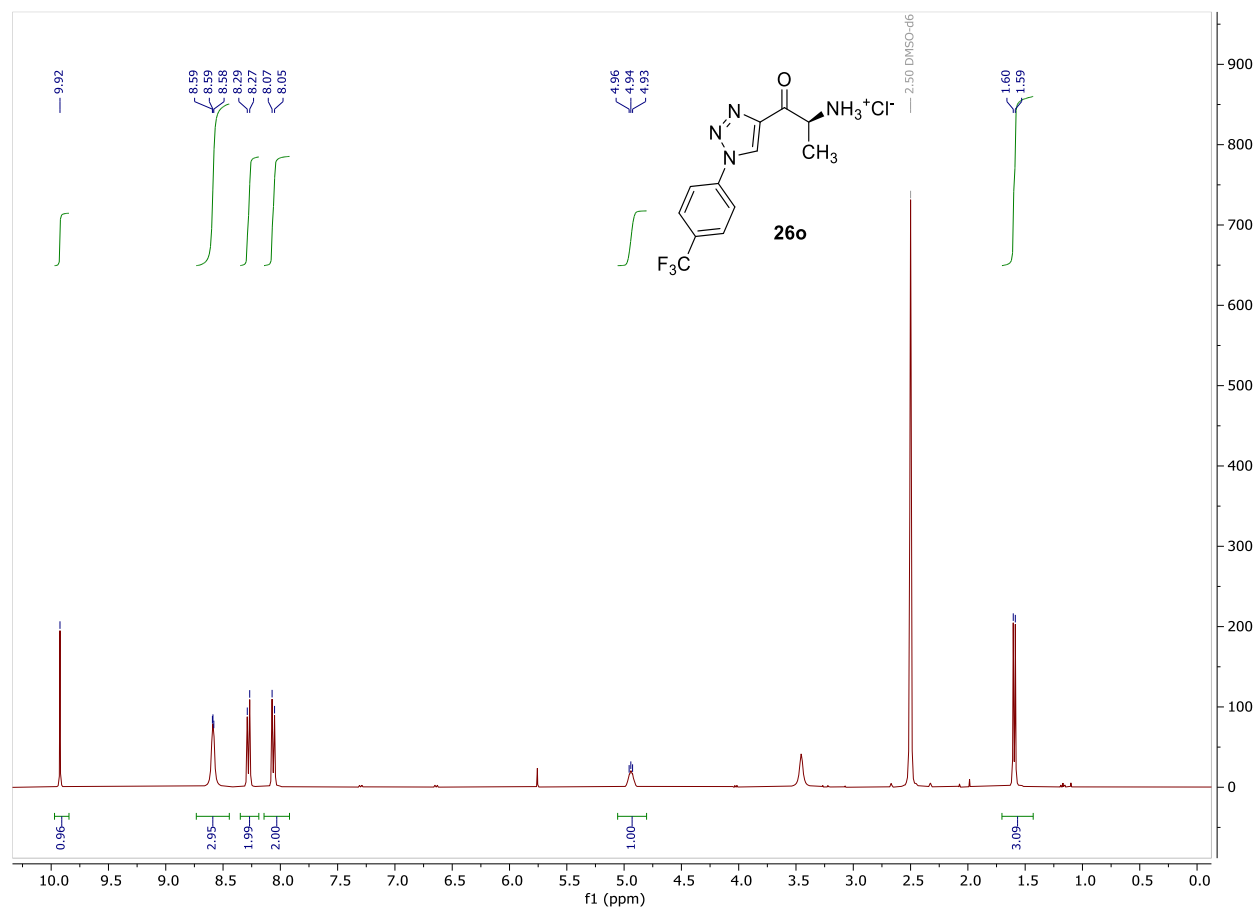

Compound **26o** ( $^{13}\text{C}$  NMR, 101 MHz):

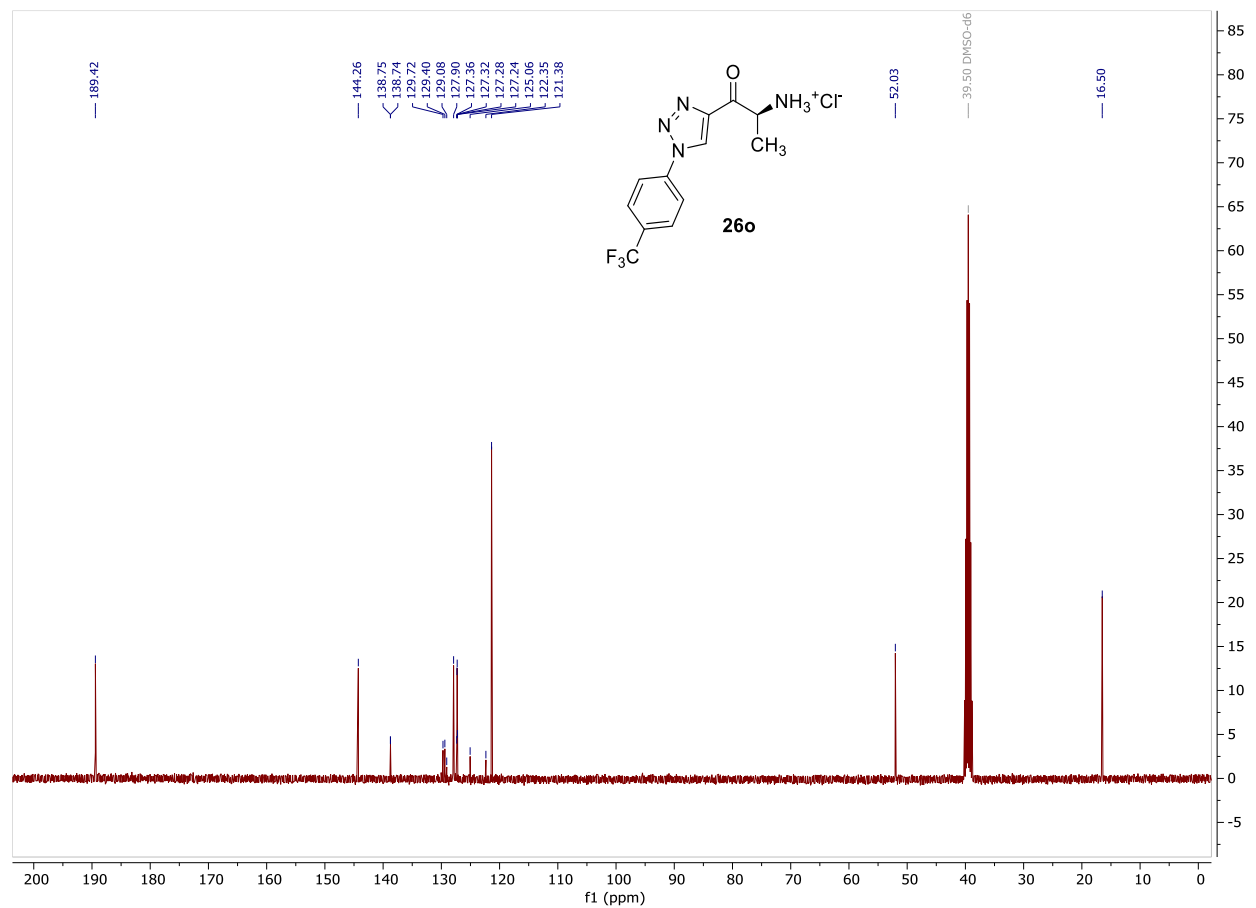

Compound **26o** ( $^{19}\text{F}$  NMR, 282 MHz):

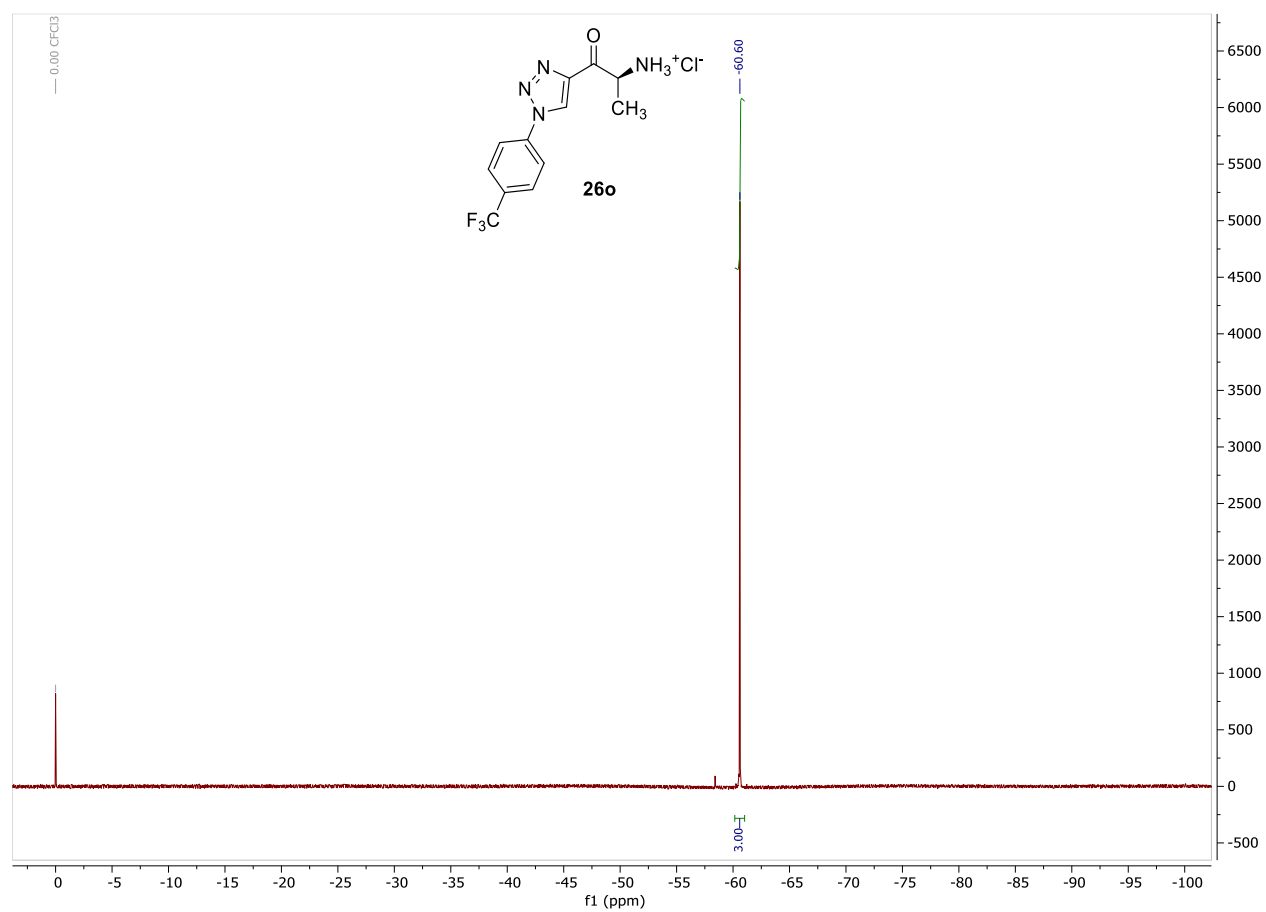

Compound **26p** ( $^1\text{H}$  NMR, 400 MHz):

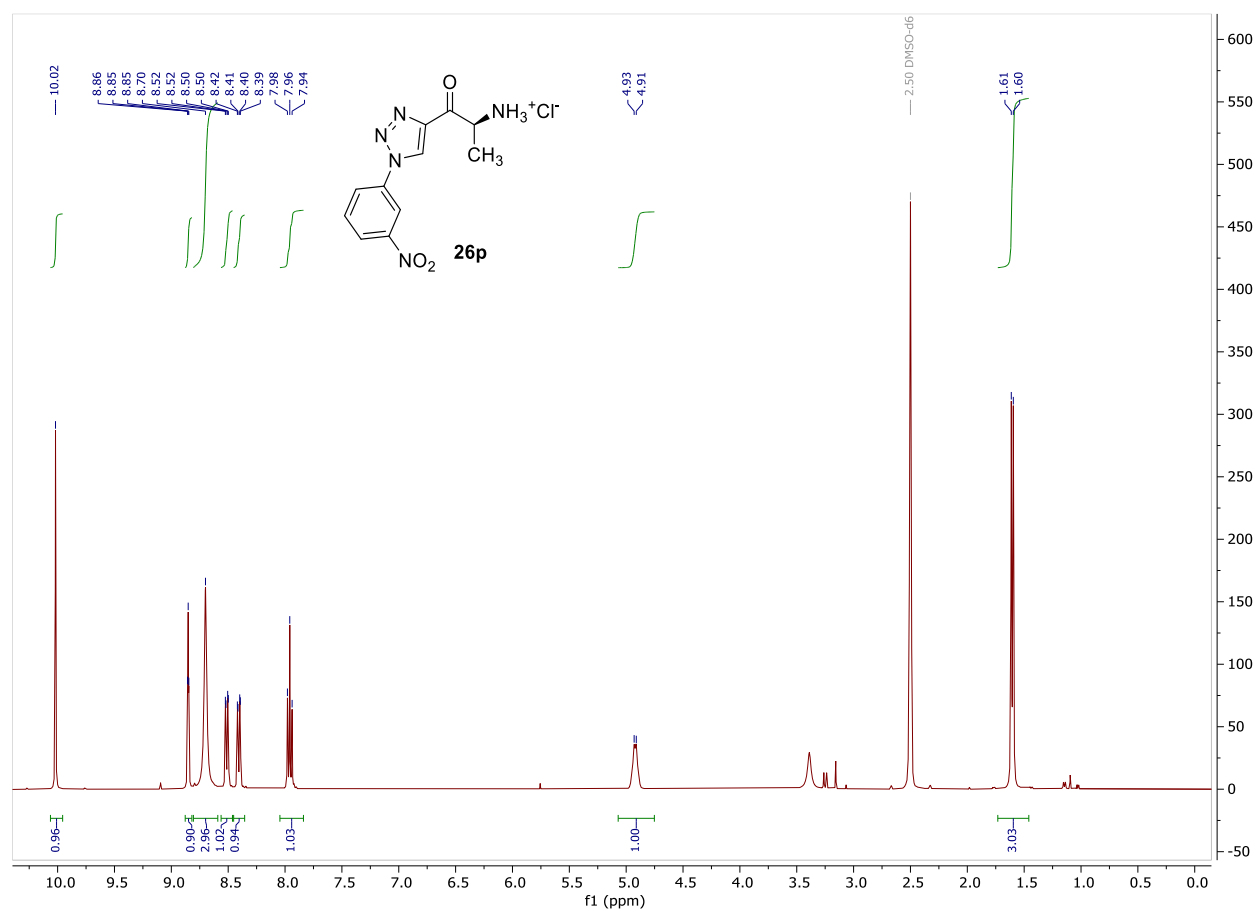

Compound **26p** ( $^{13}\text{C}$  NMR, 101 MHz):

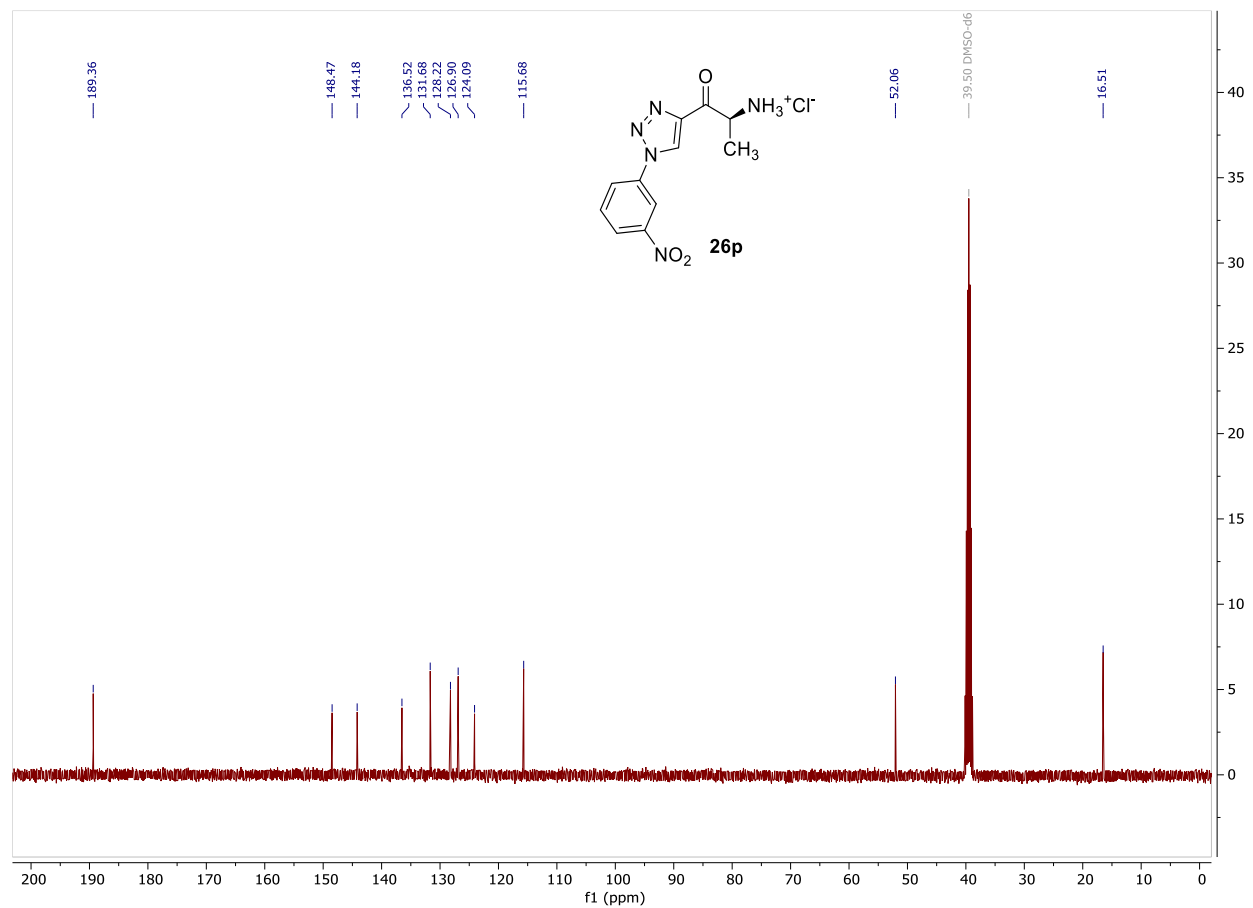

Compound **26q** ( $^1\text{H}$  NMR, 400 MHz):

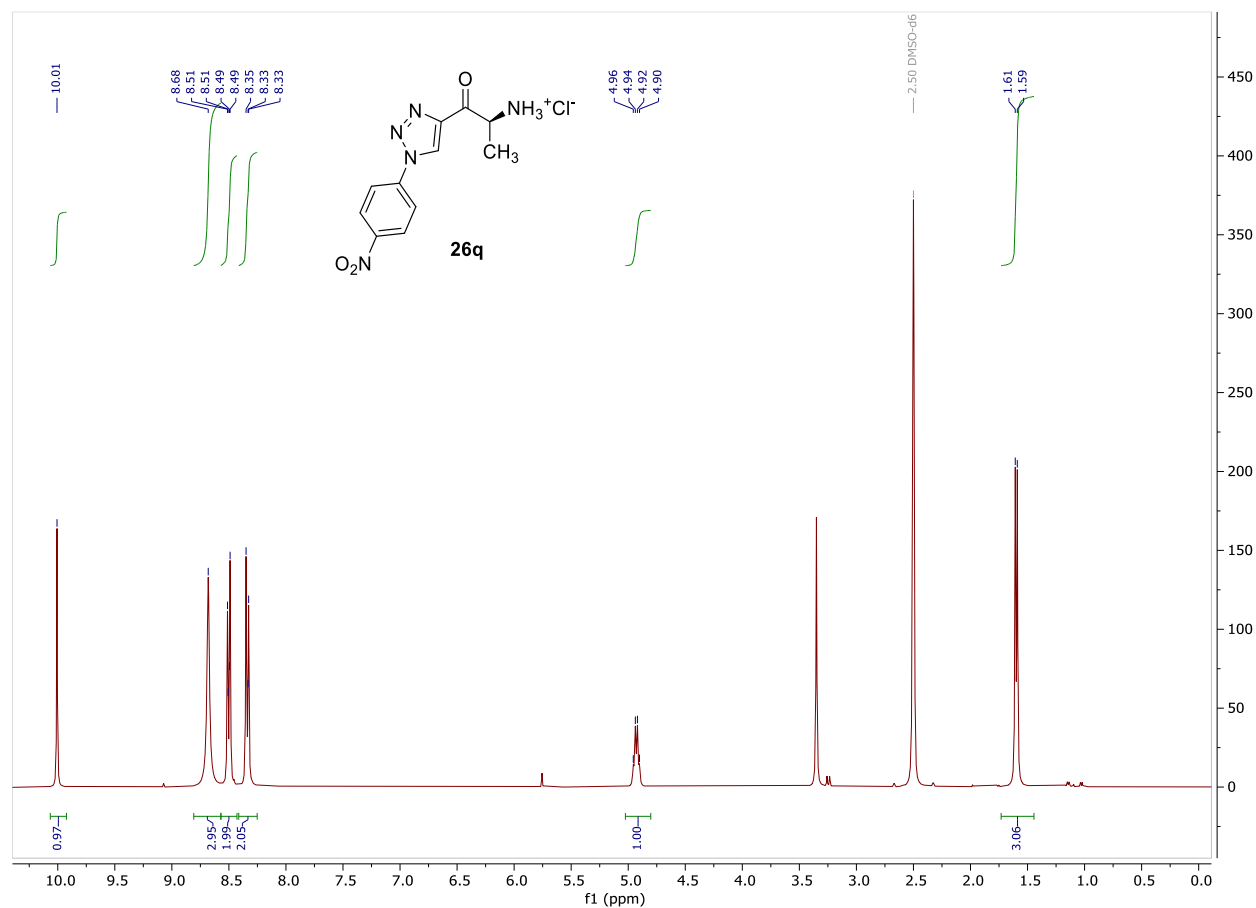

Compound **26q** ( $^{13}\text{C}$  NMR, 101 MHz):

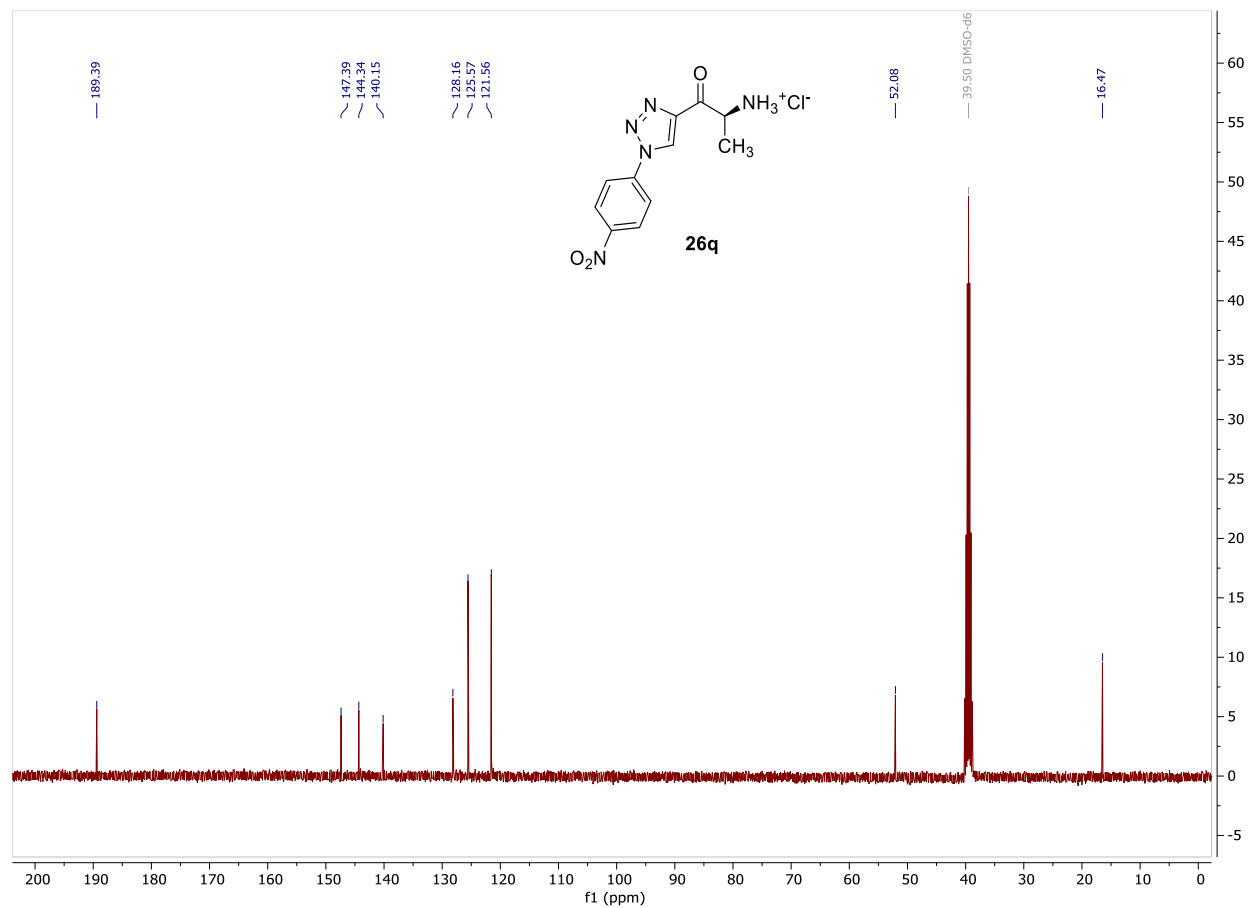

Compound **26r** ( $^1\text{H}$  NMR, 400 MHz):

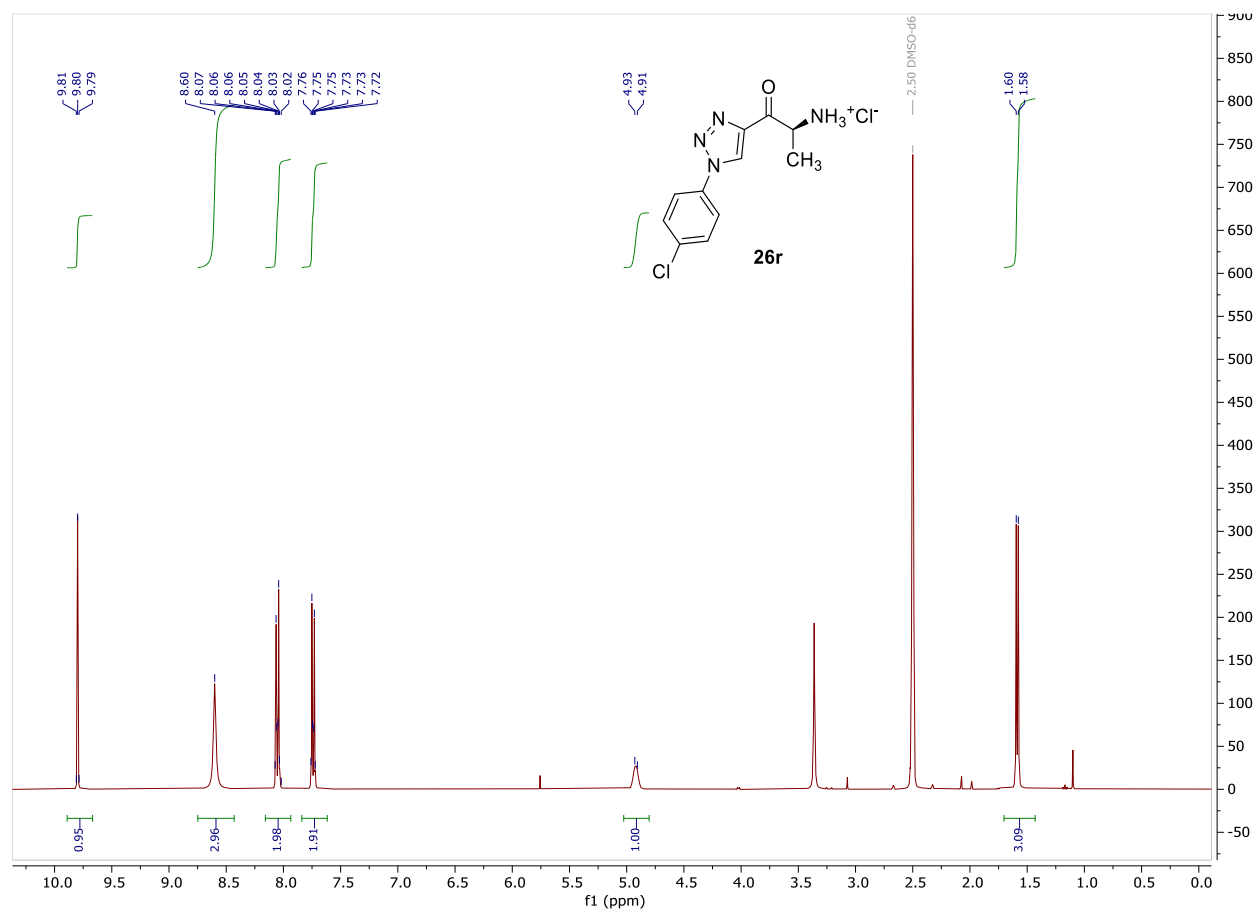

Compound **26r** ( $^{13}\text{C}$  NMR, 101 MHz):

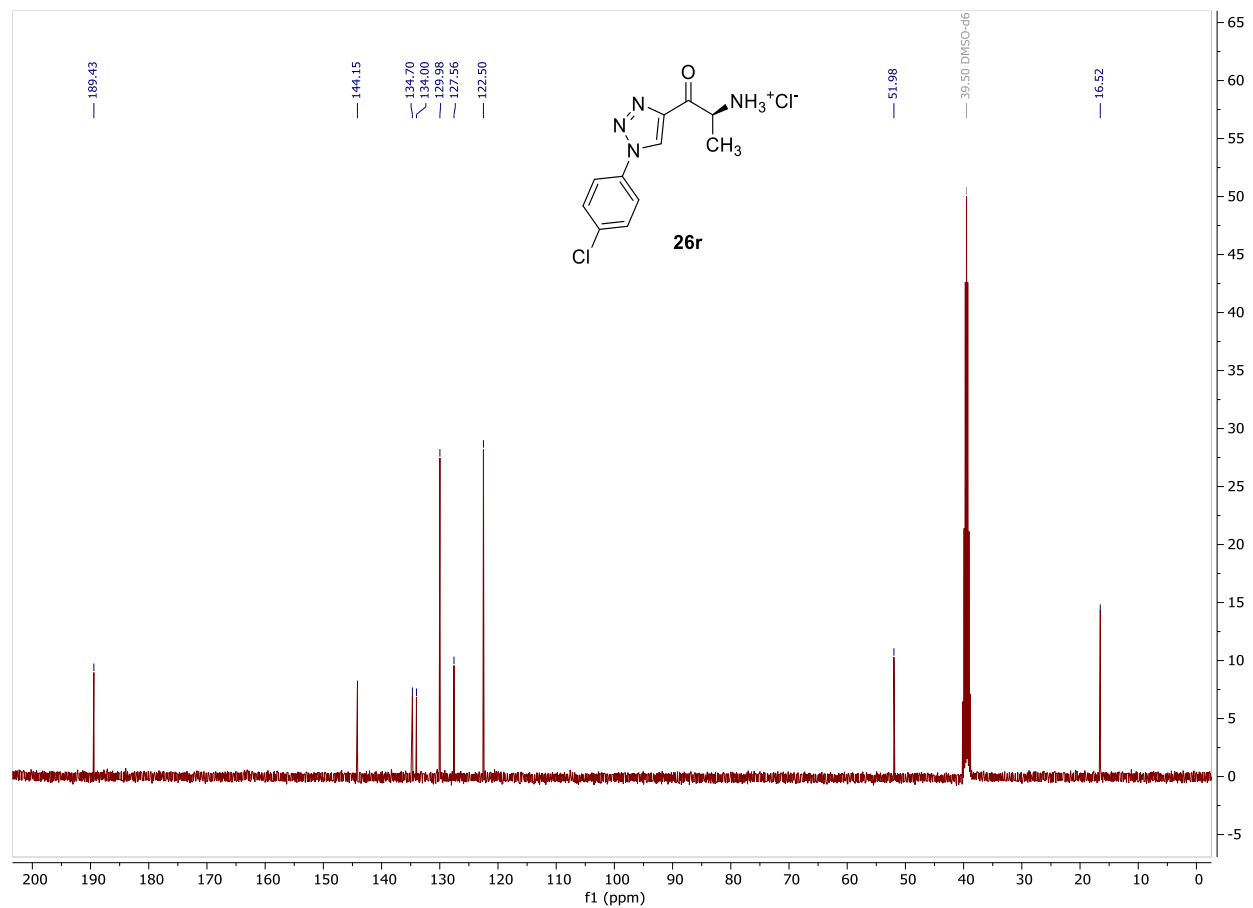

Compound **26s** ( $^1\text{H}$  NMR, 400 MHz):

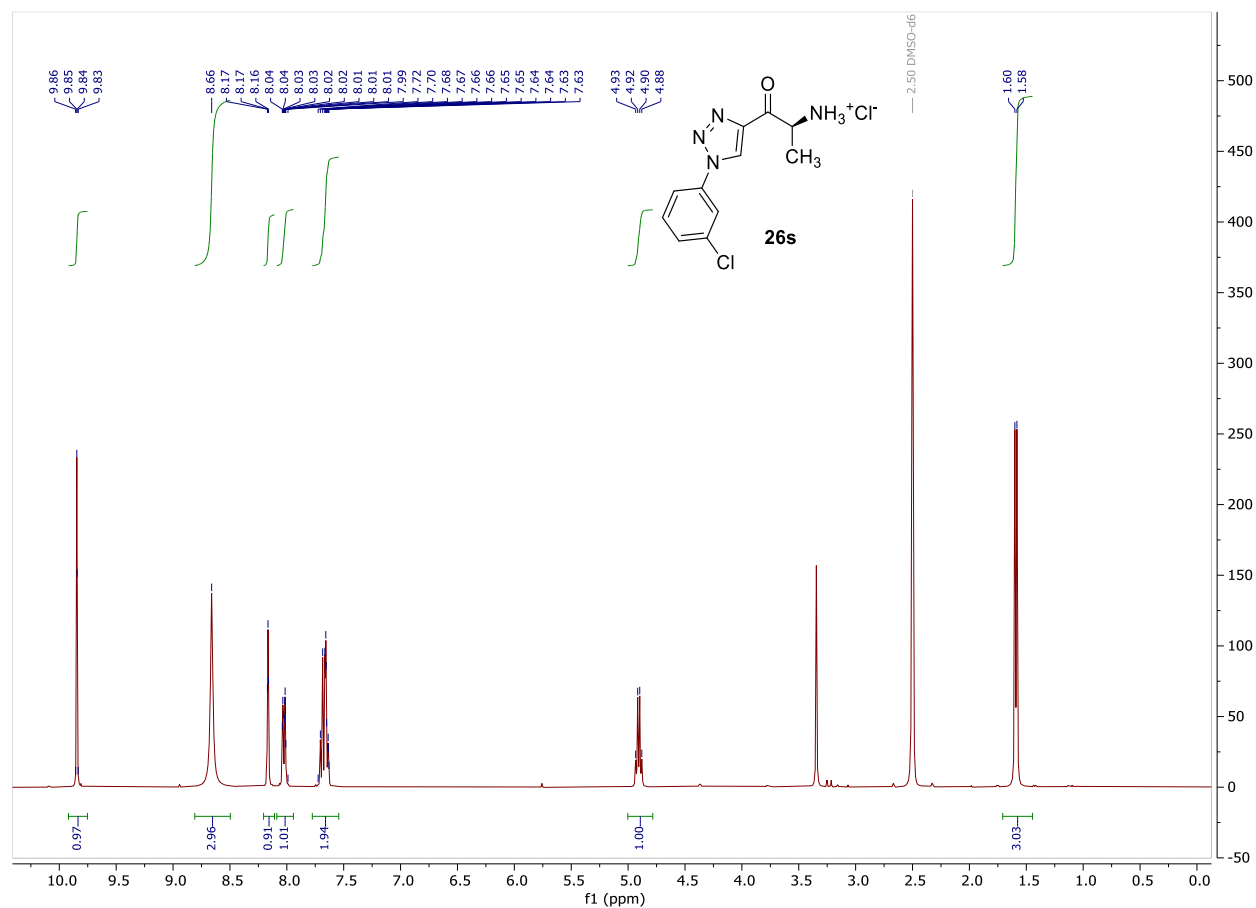

Compound **26s** ( $^{13}\text{C}$  NMR, 101 MHz):

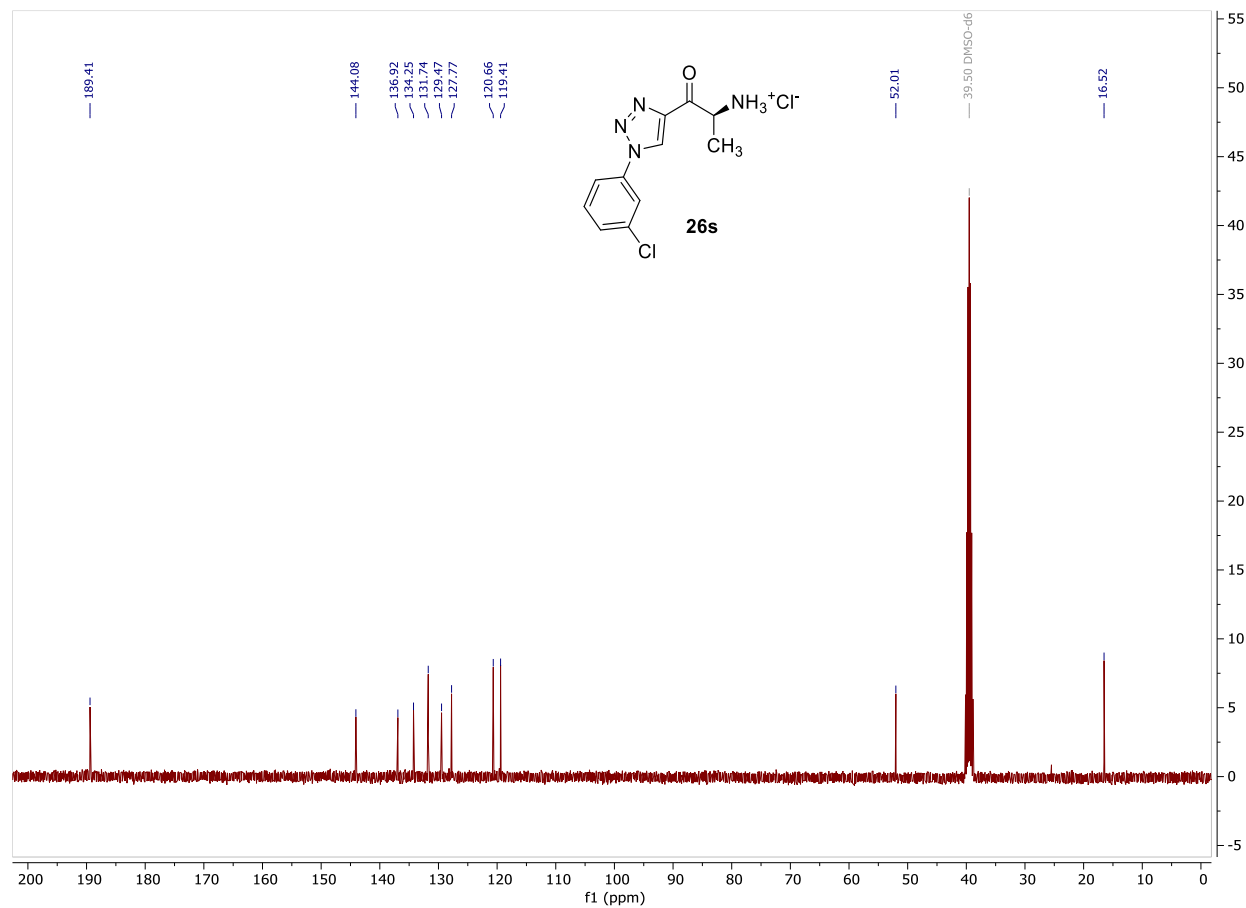

Compound **26t** ( $^1\text{H}$  NMR, 400 MHz):

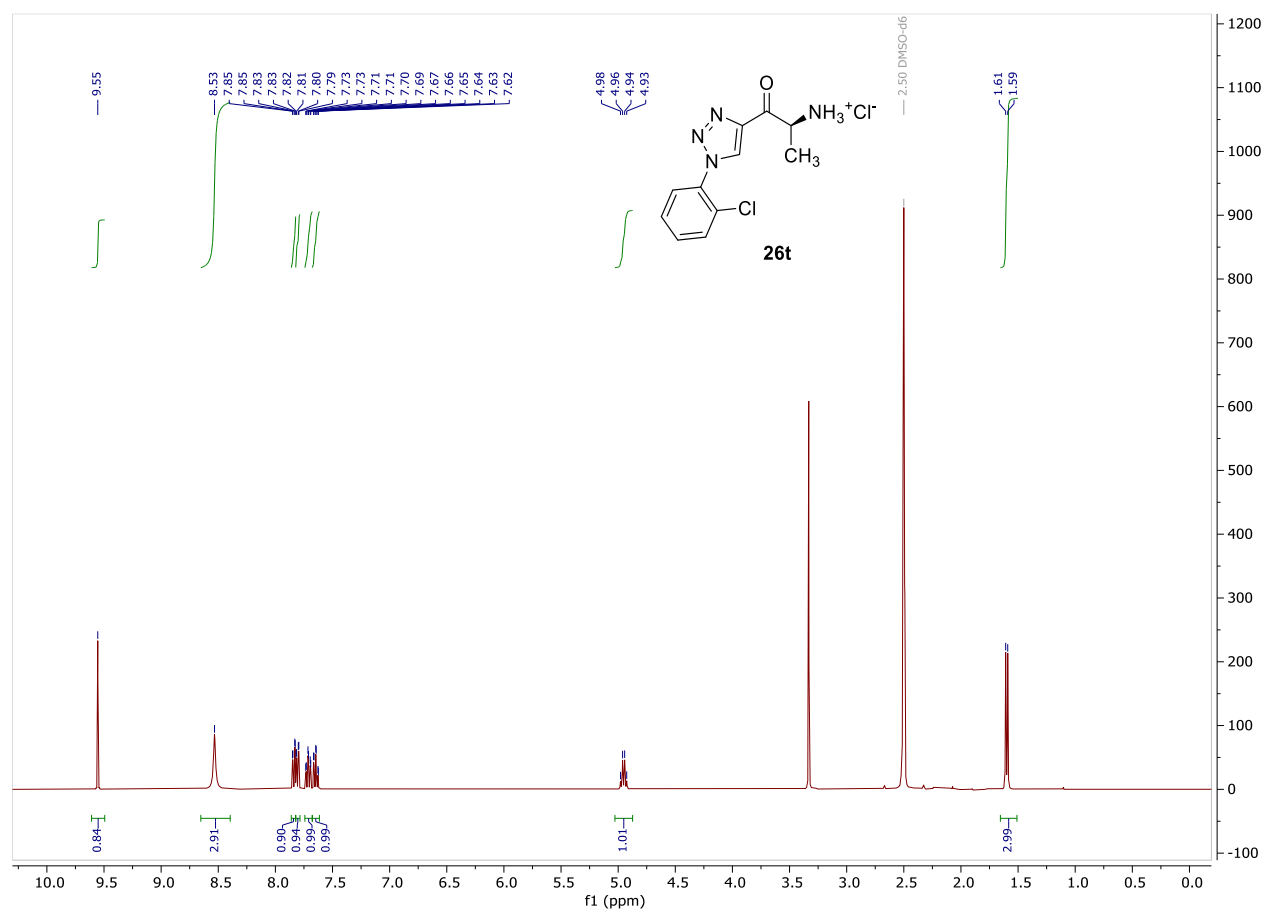

Compound **26t** ( $^{13}\text{C}$  NMR, 101 MHz):

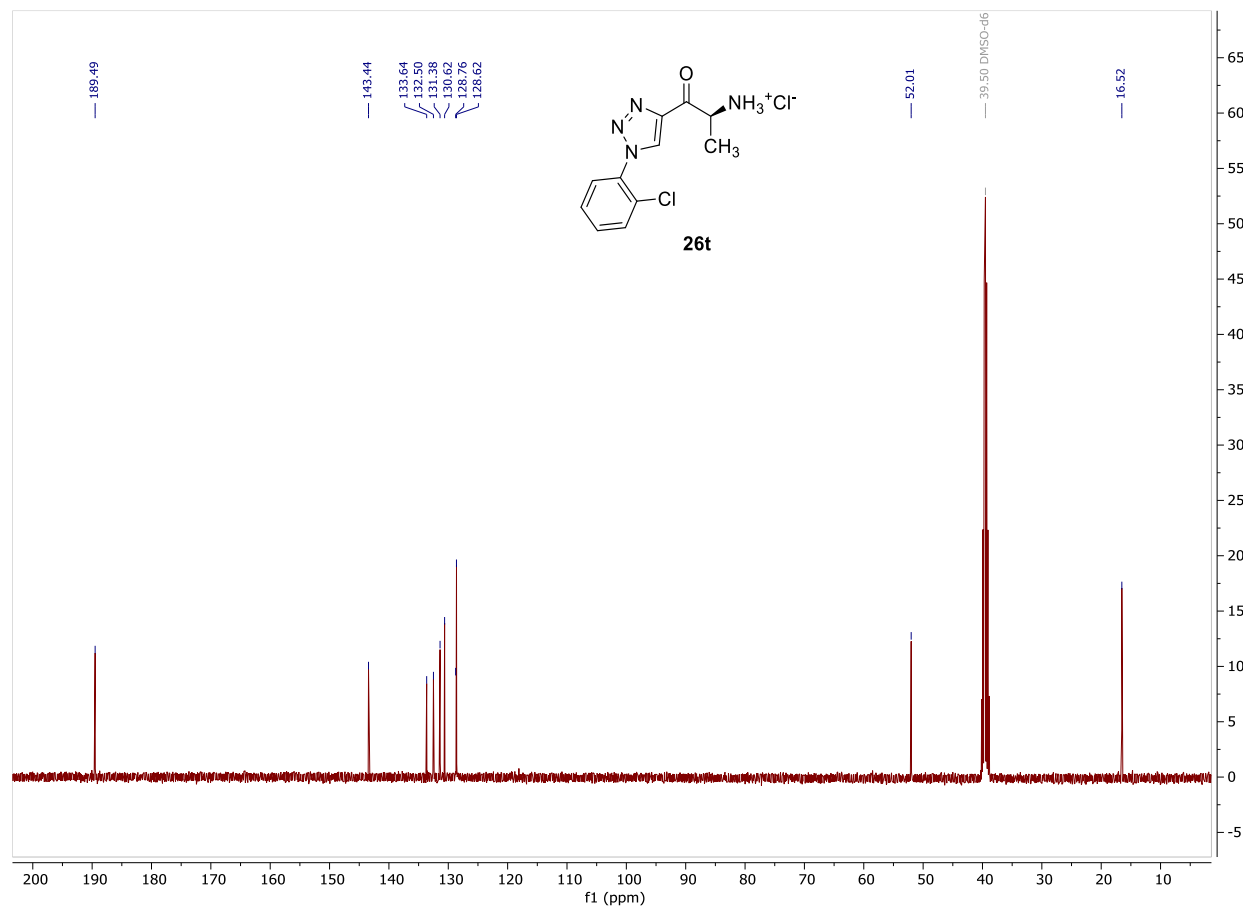



Compound **26u** ( $^1\text{H}$  NMR, 400 MHz):

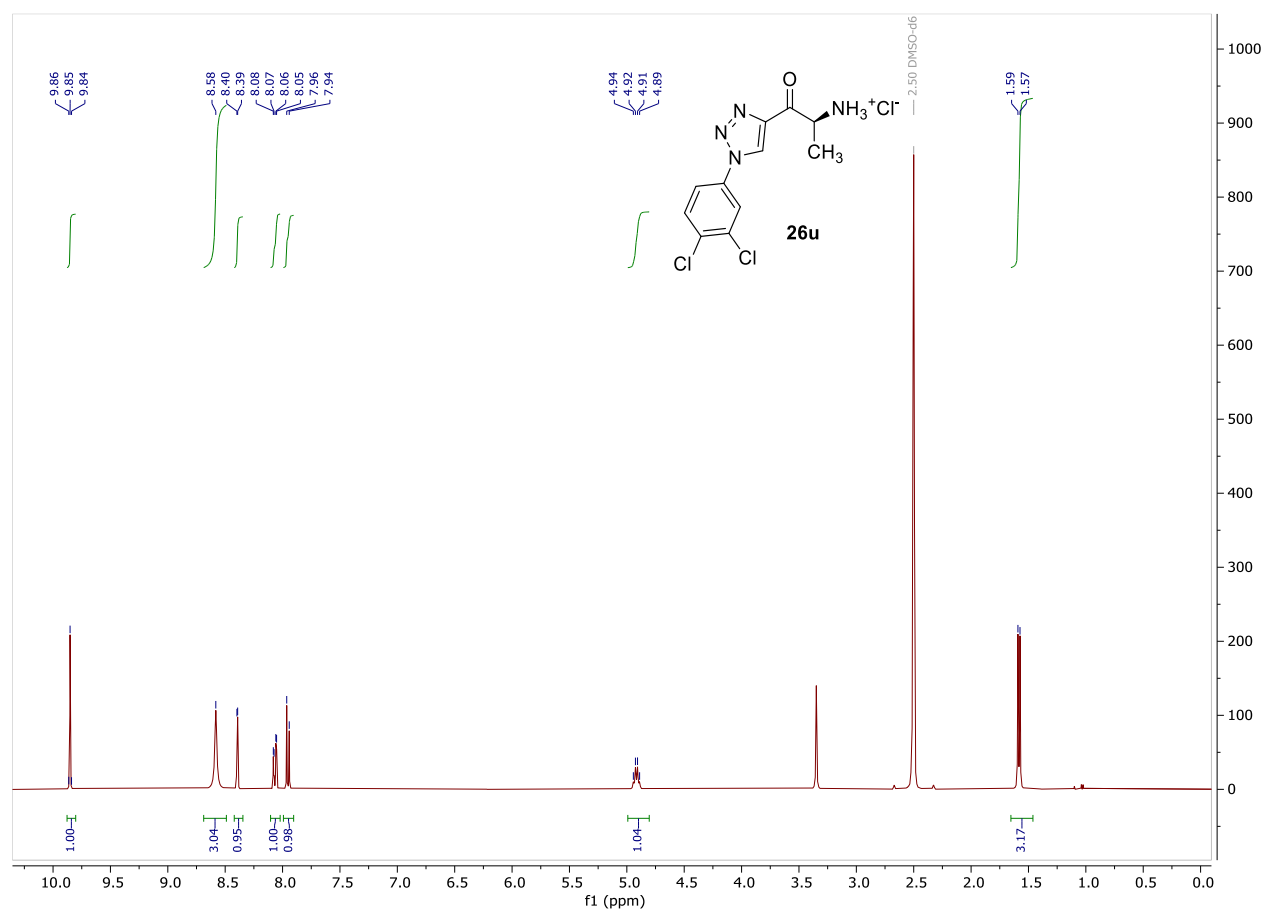

Compound **26u** ( $^{13}\text{C}$  NMR, 101 MHz):

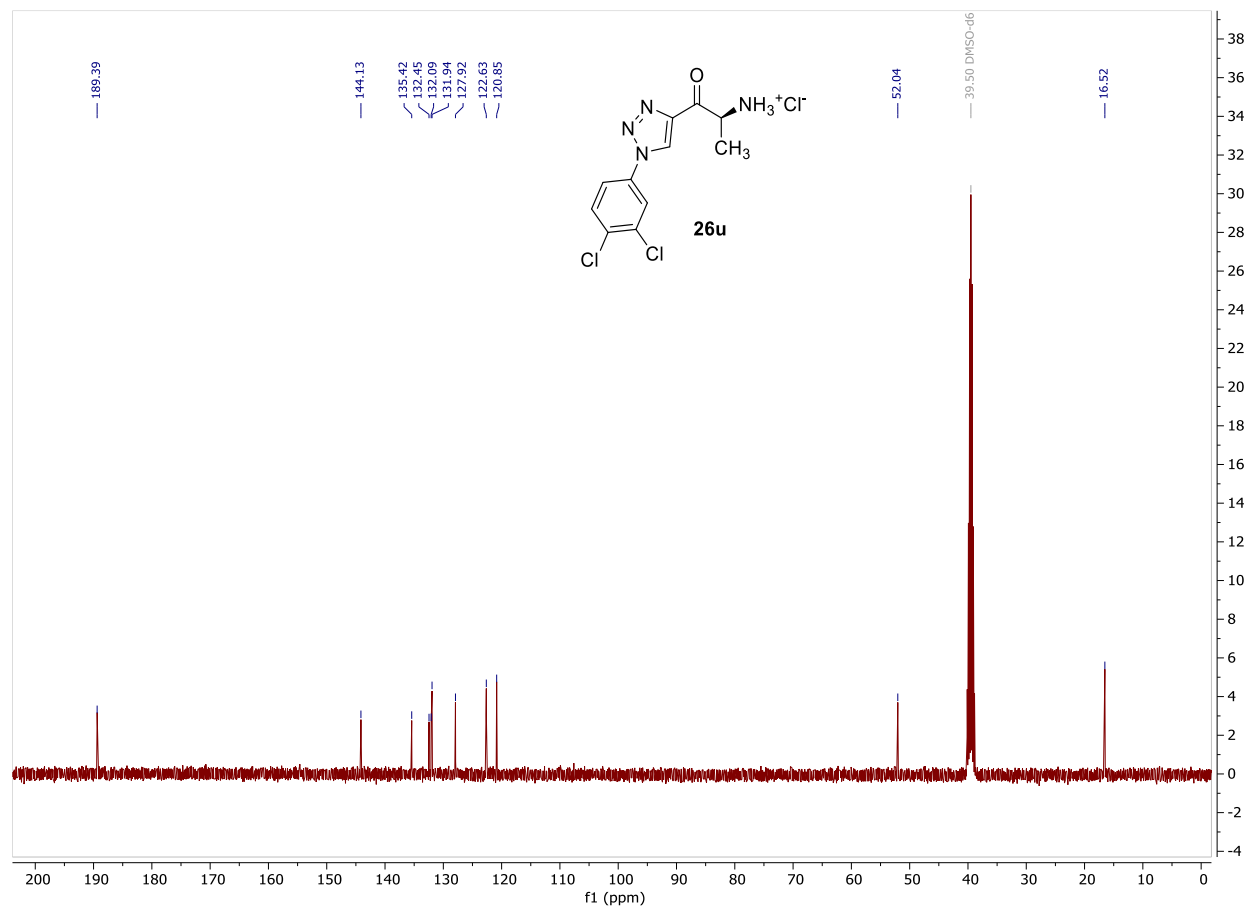

Compound **26v** ( $^1\text{H}$  NMR, 400 MHz):

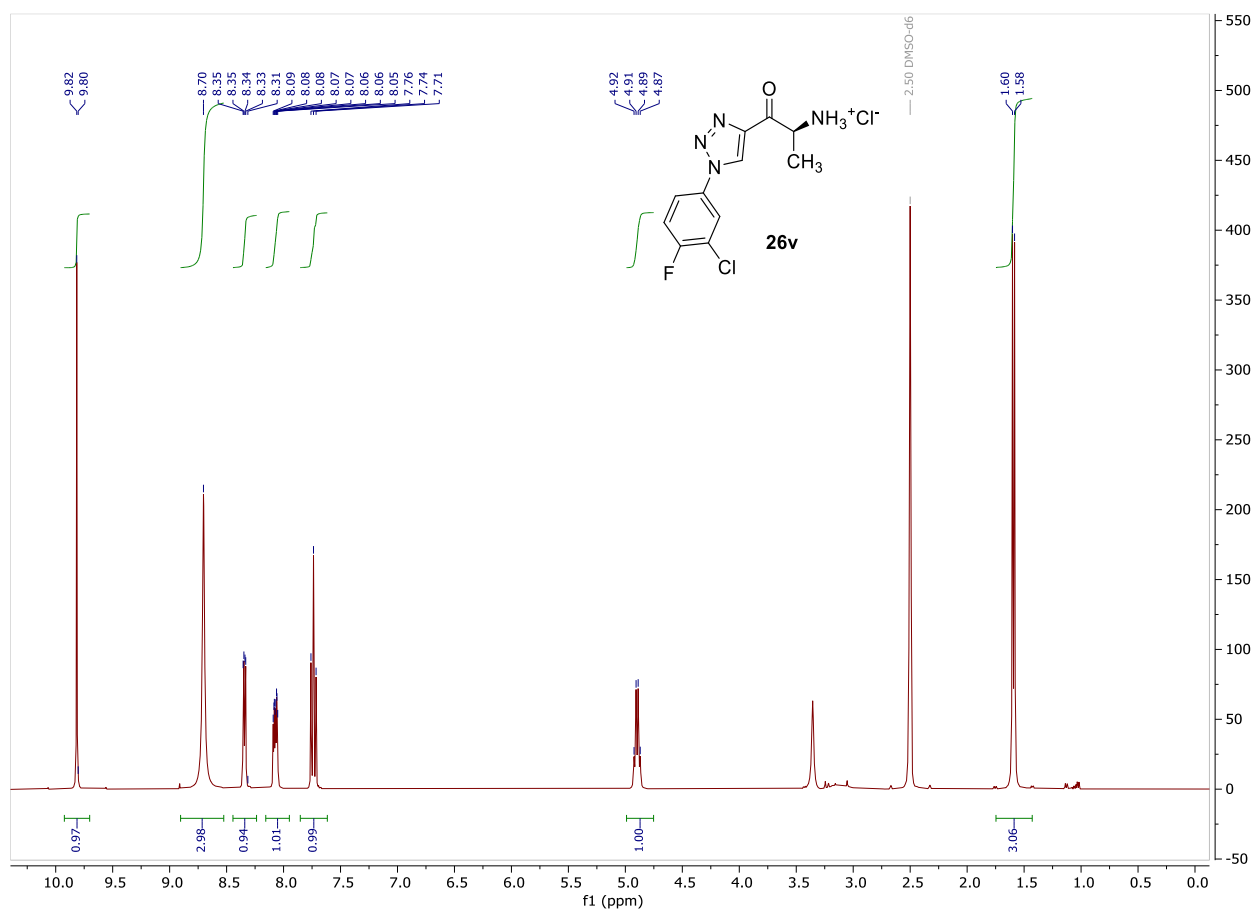

Compound **26v** ( $^{13}\text{C}$  NMR, 101 MHz):

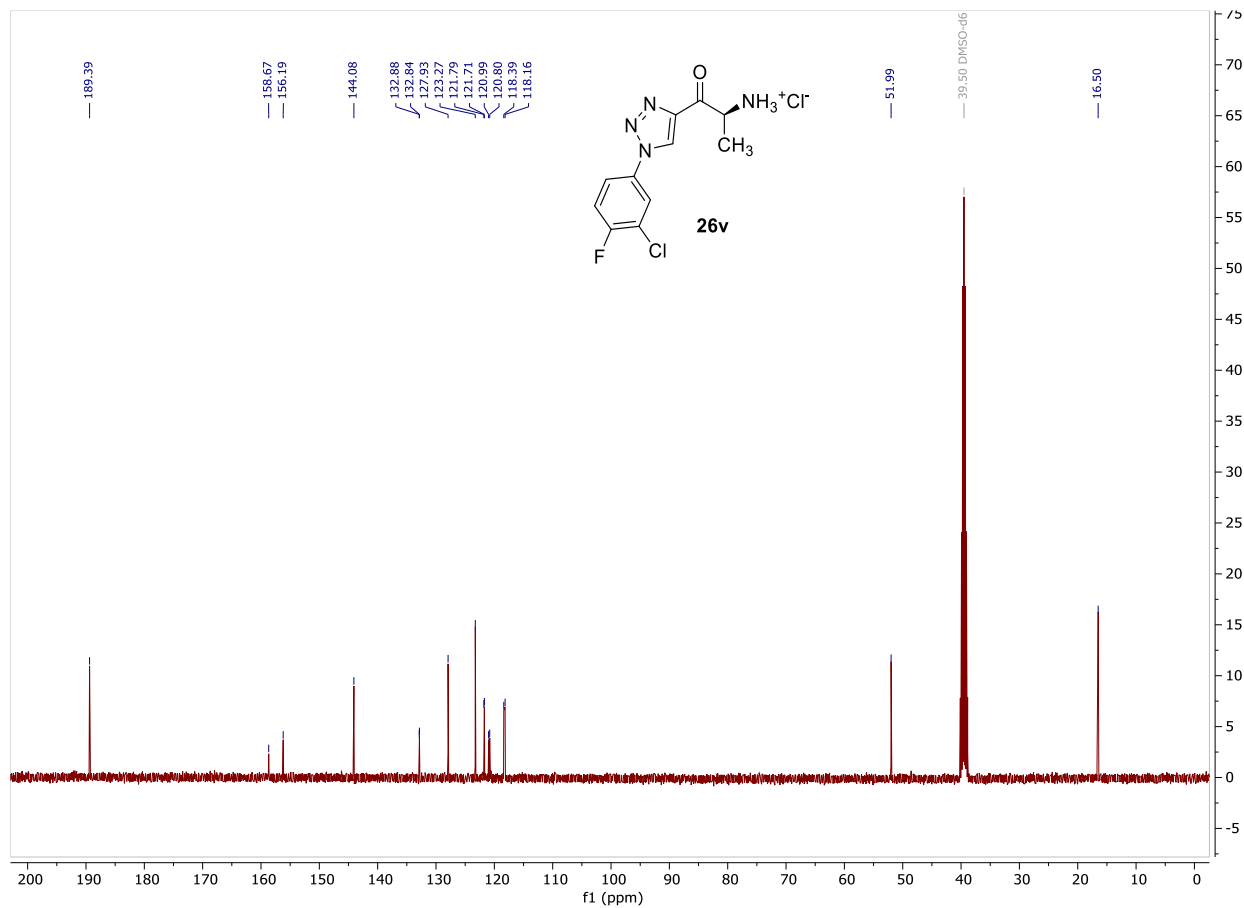

Compound **26v** ( $^{19}\text{F}$  NMR, 282 MHz):

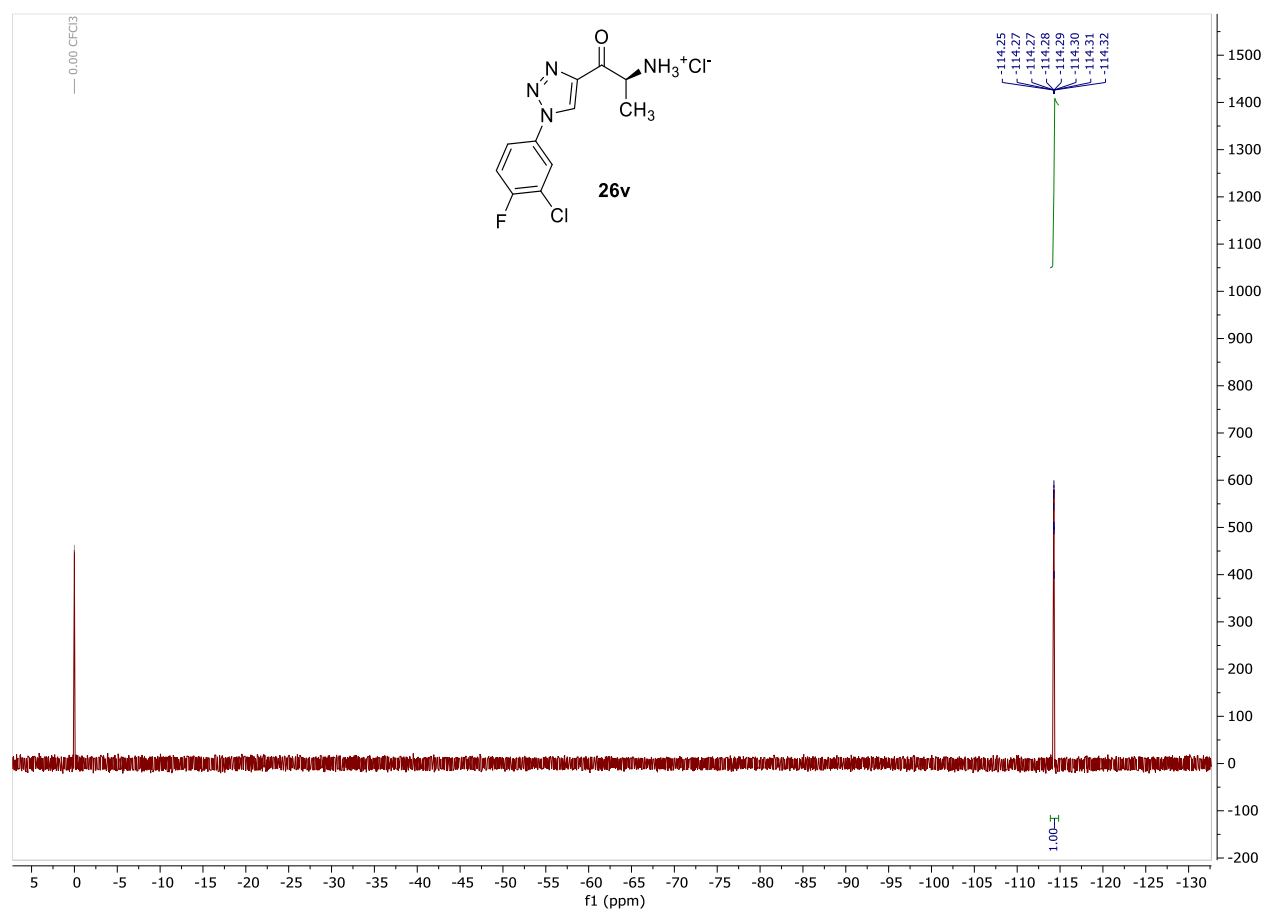

Compound **32a** ( $^1\text{H}$  NMR, 400 MHz):

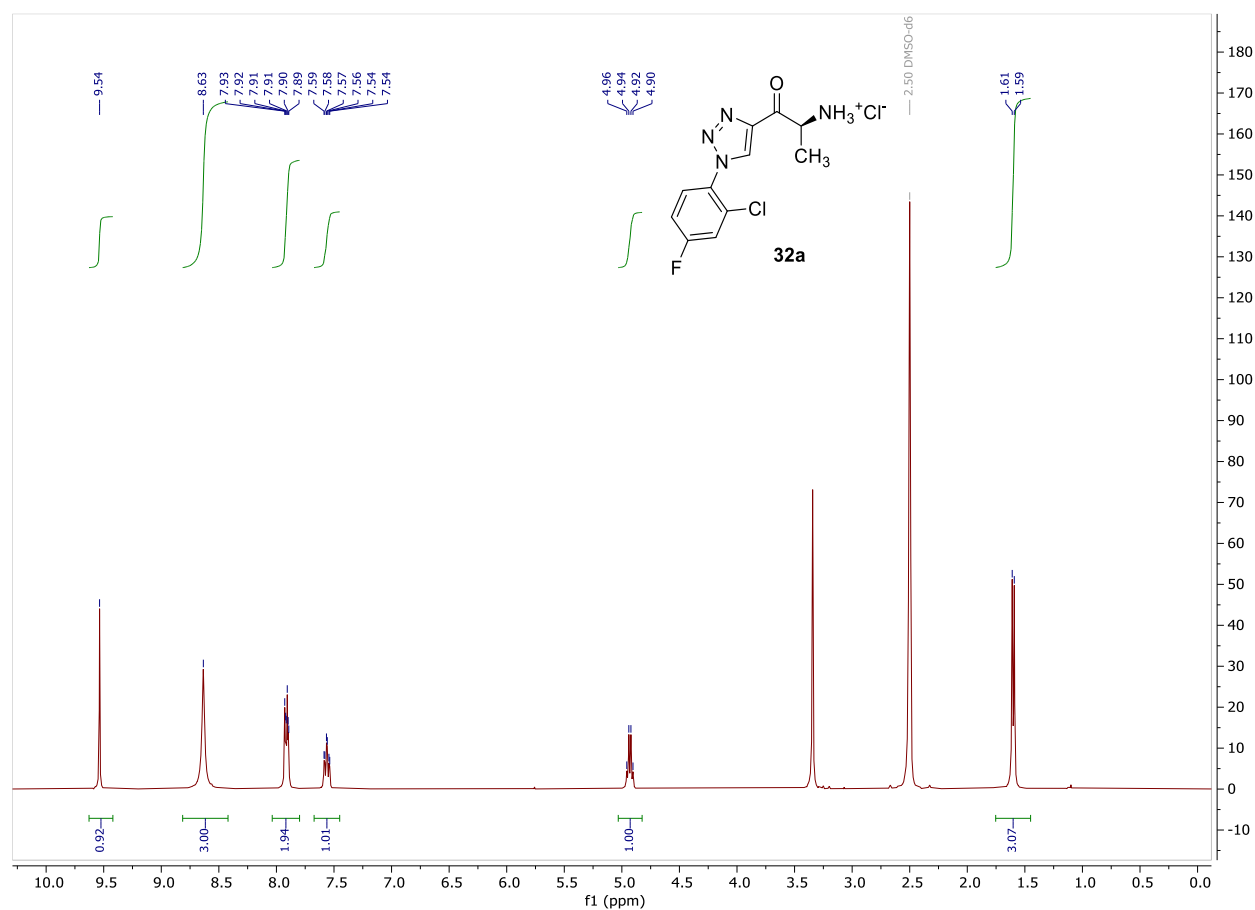

Compound **32a** ( $^{13}\text{C}$  NMR, 101 MHz):

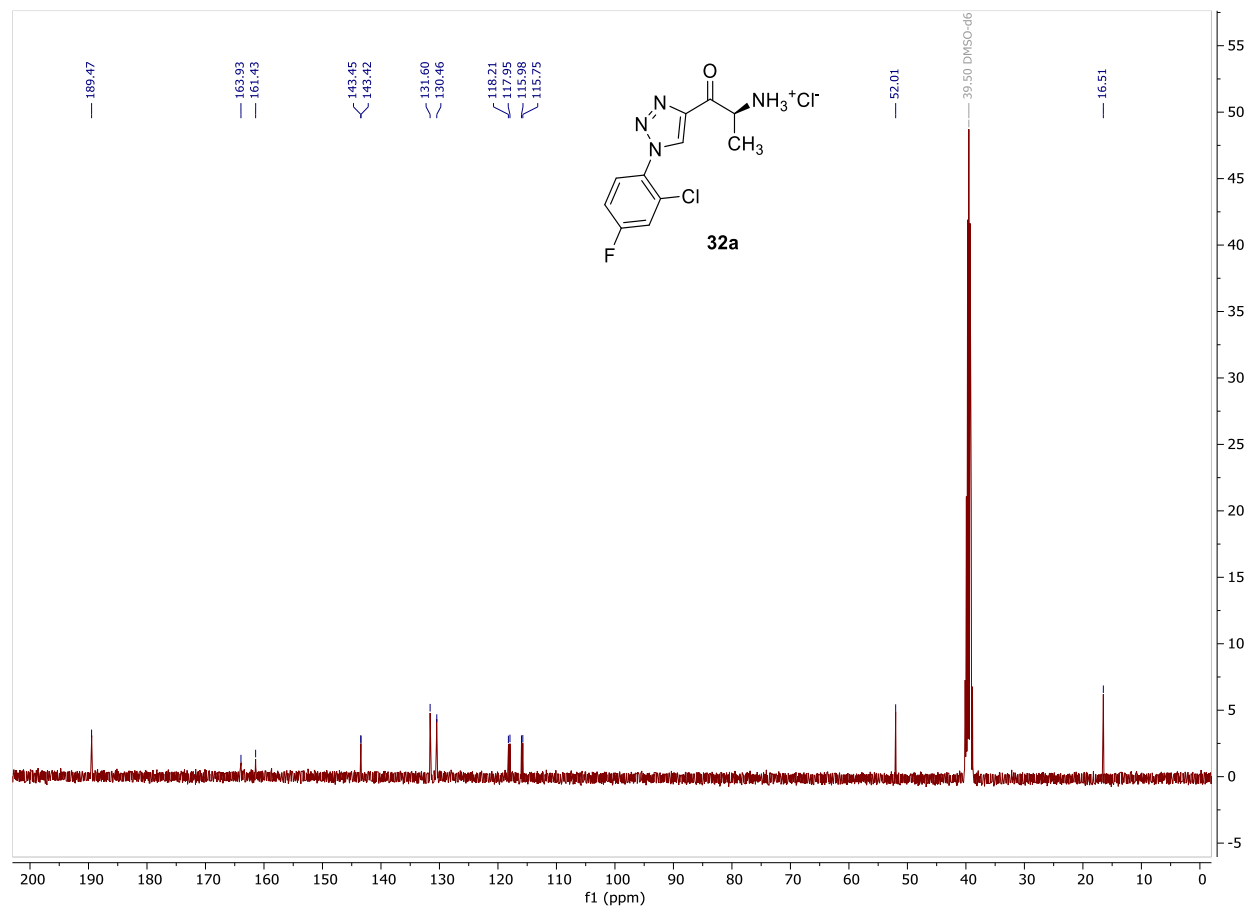

Compound **32a** ( $^{19}\text{F}$  NMR, 282 MHz):

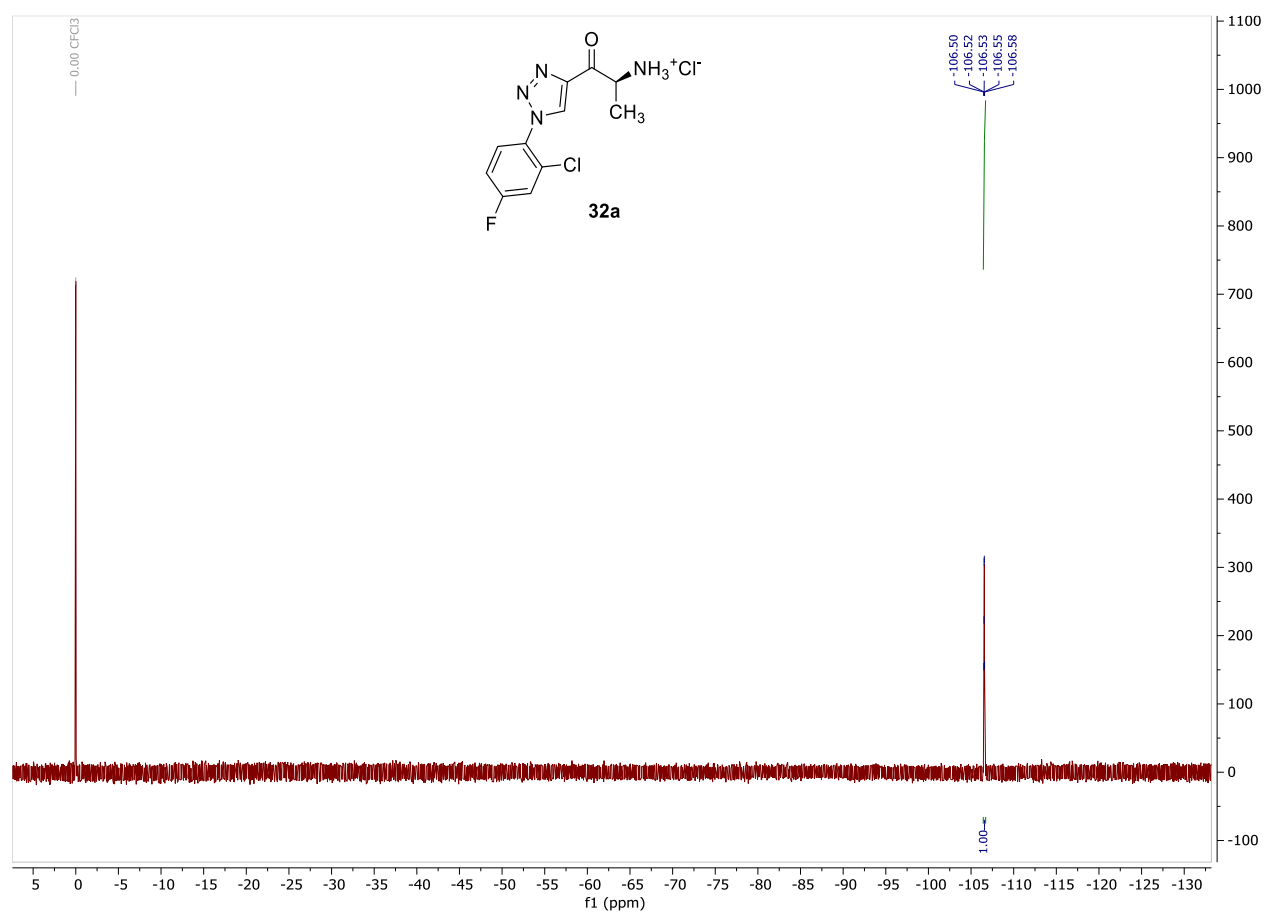

Compound **32b** ( $^1\text{H}$  NMR, 400 MHz):

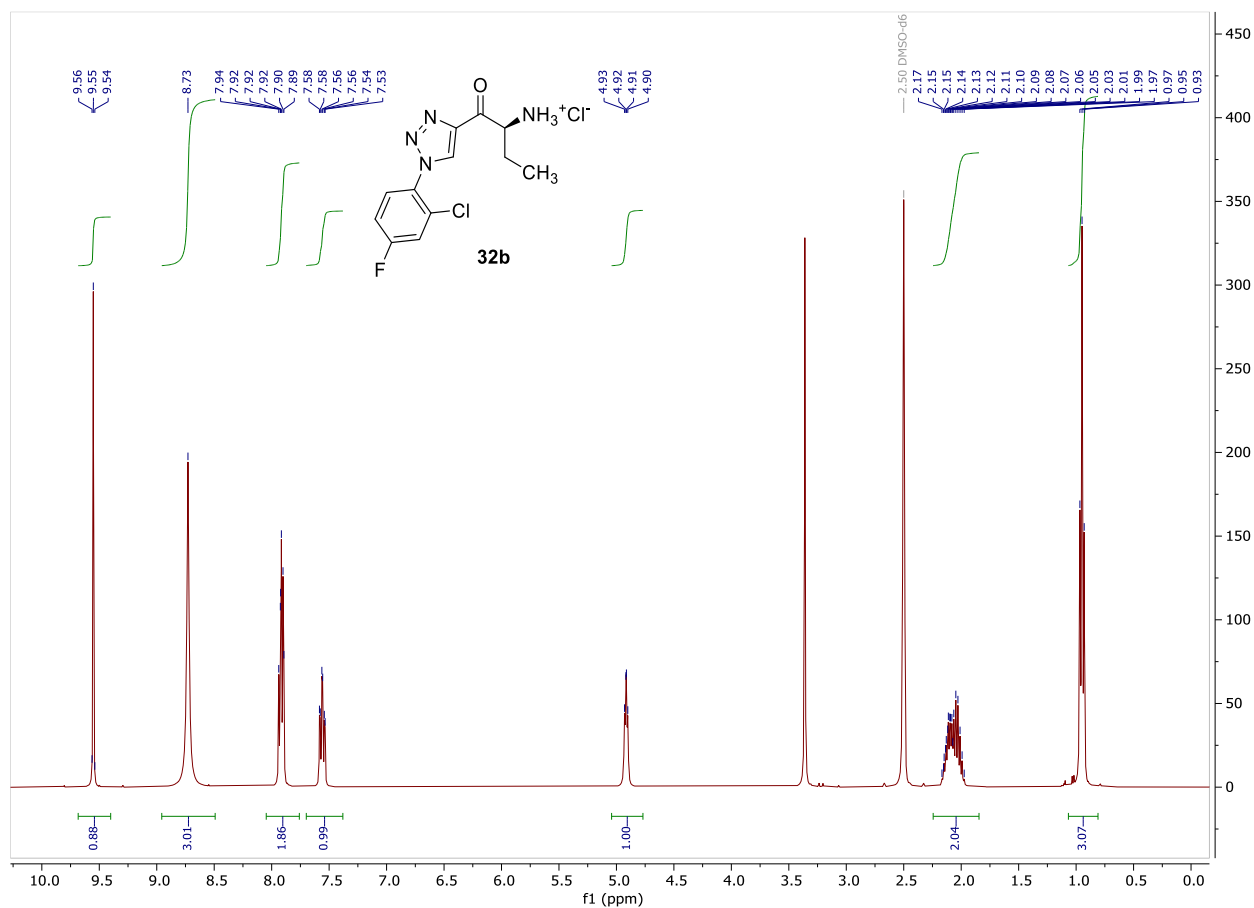

Compound **32b** ( $^{13}\text{C}$  NMR, 101 MHz):

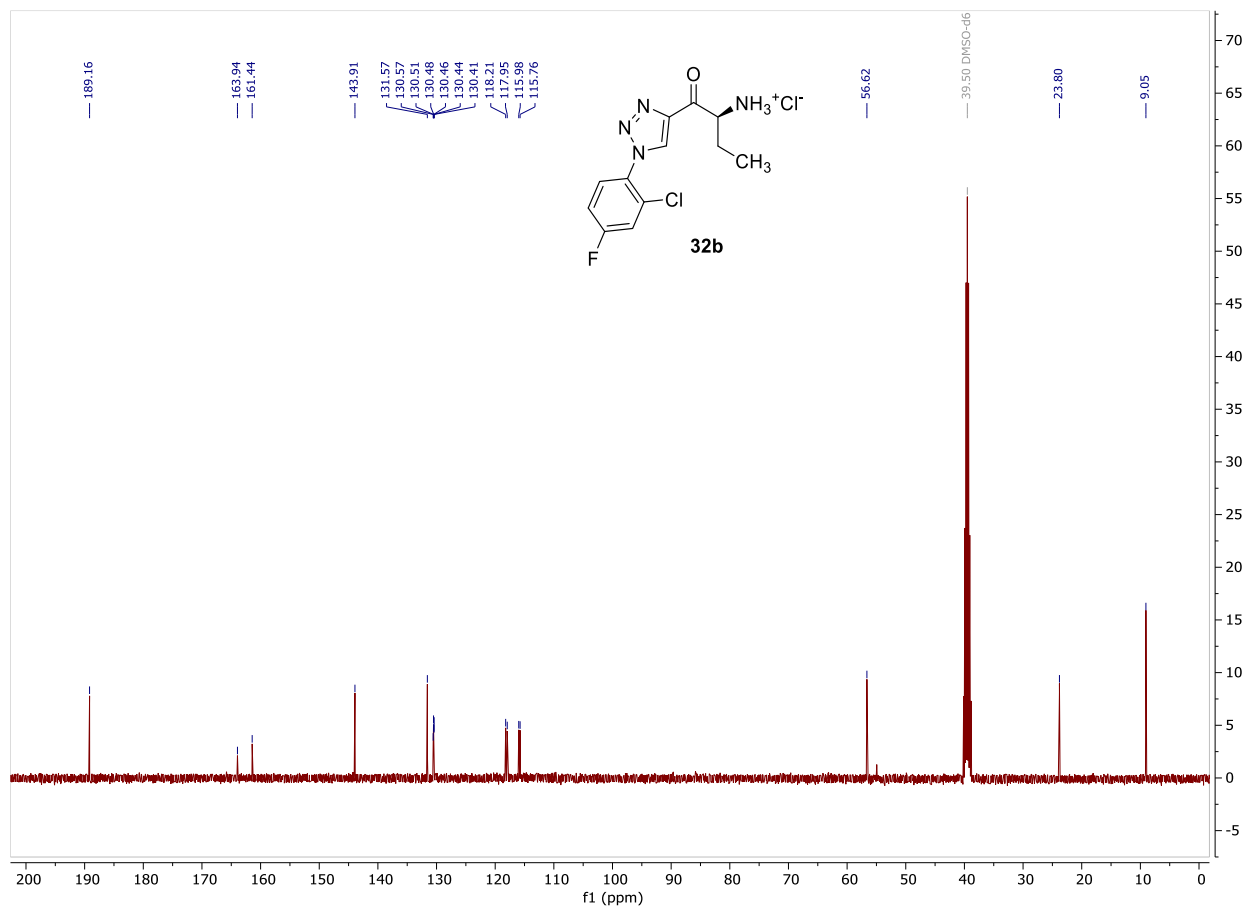

Compound **32b** ( $^{19}\text{F}$  NMR, 282 MHz):

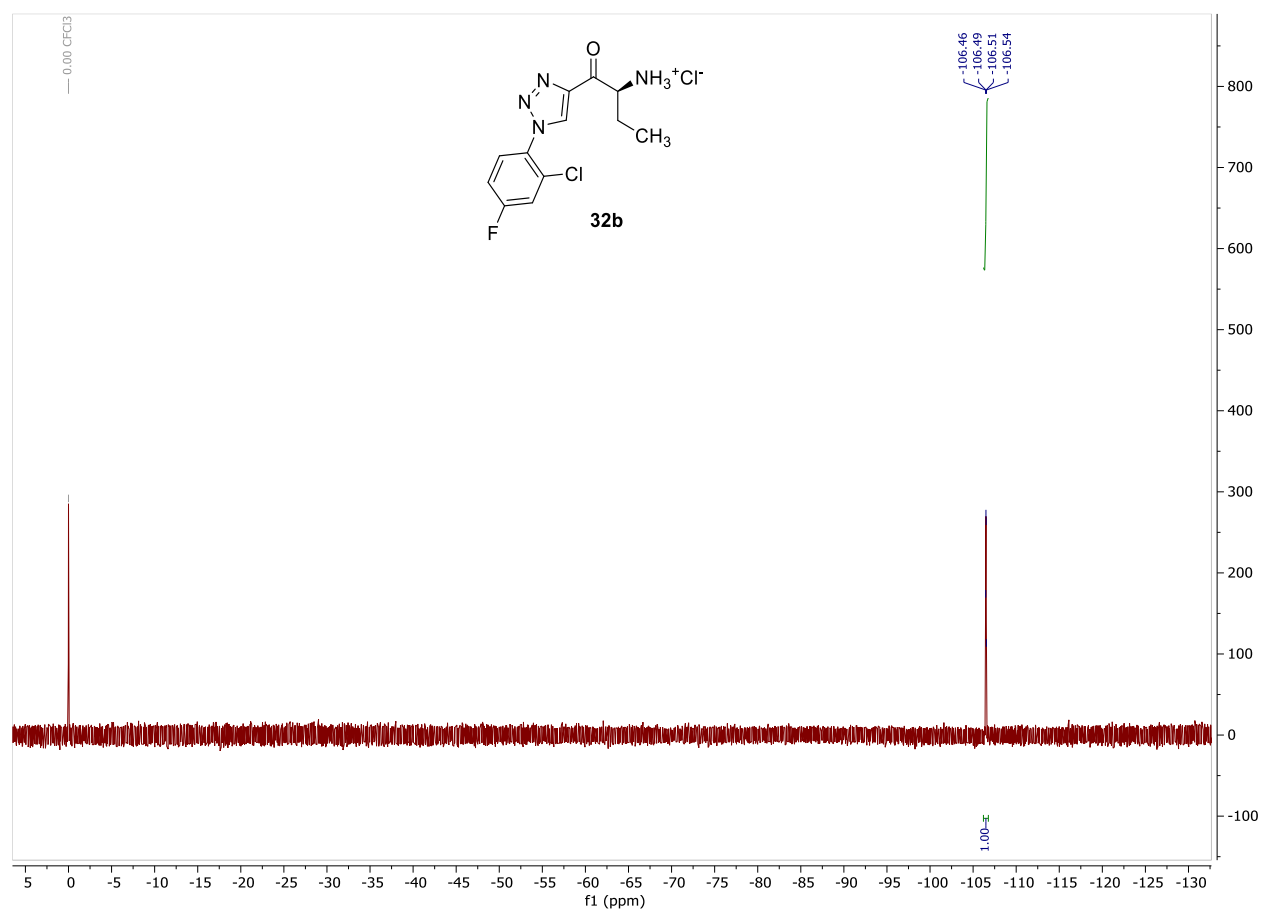

Compound **32c** ( $^1\text{H}$  NMR, 400 MHz):

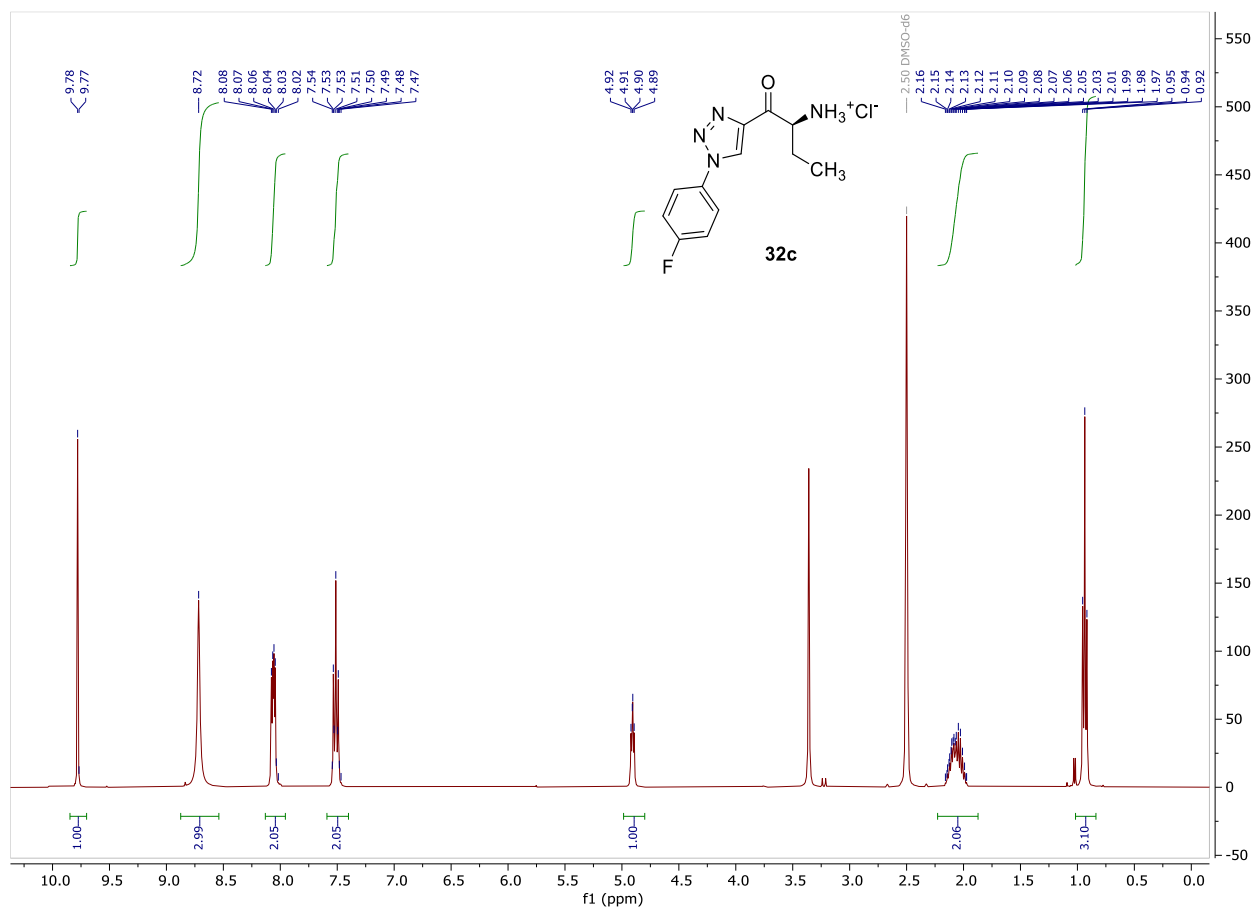

Compound **32c** ( $^{13}\text{C}$  NMR, 101 MHz):

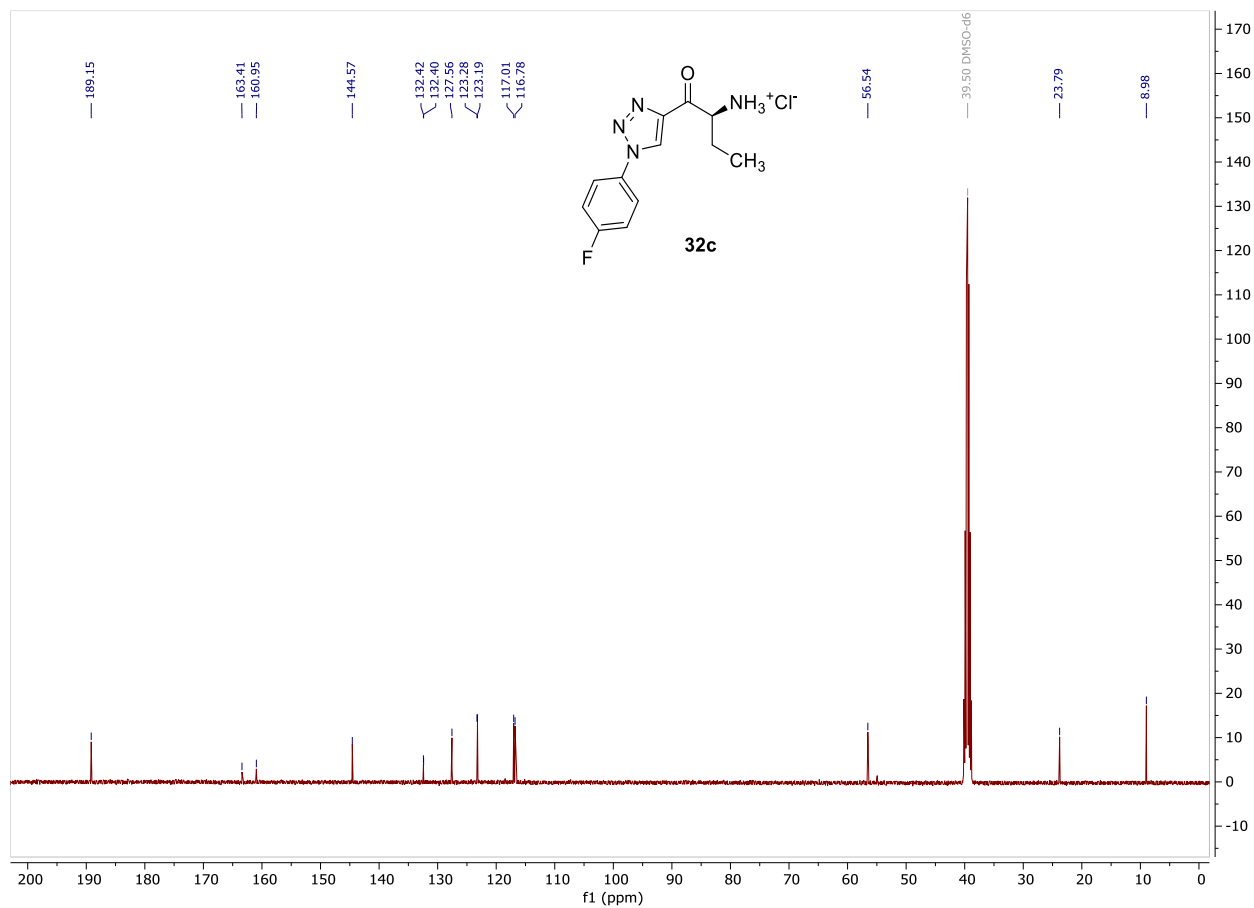



Compound **32c** ( $^{19}\text{F}$  NMR, 282 MHz):

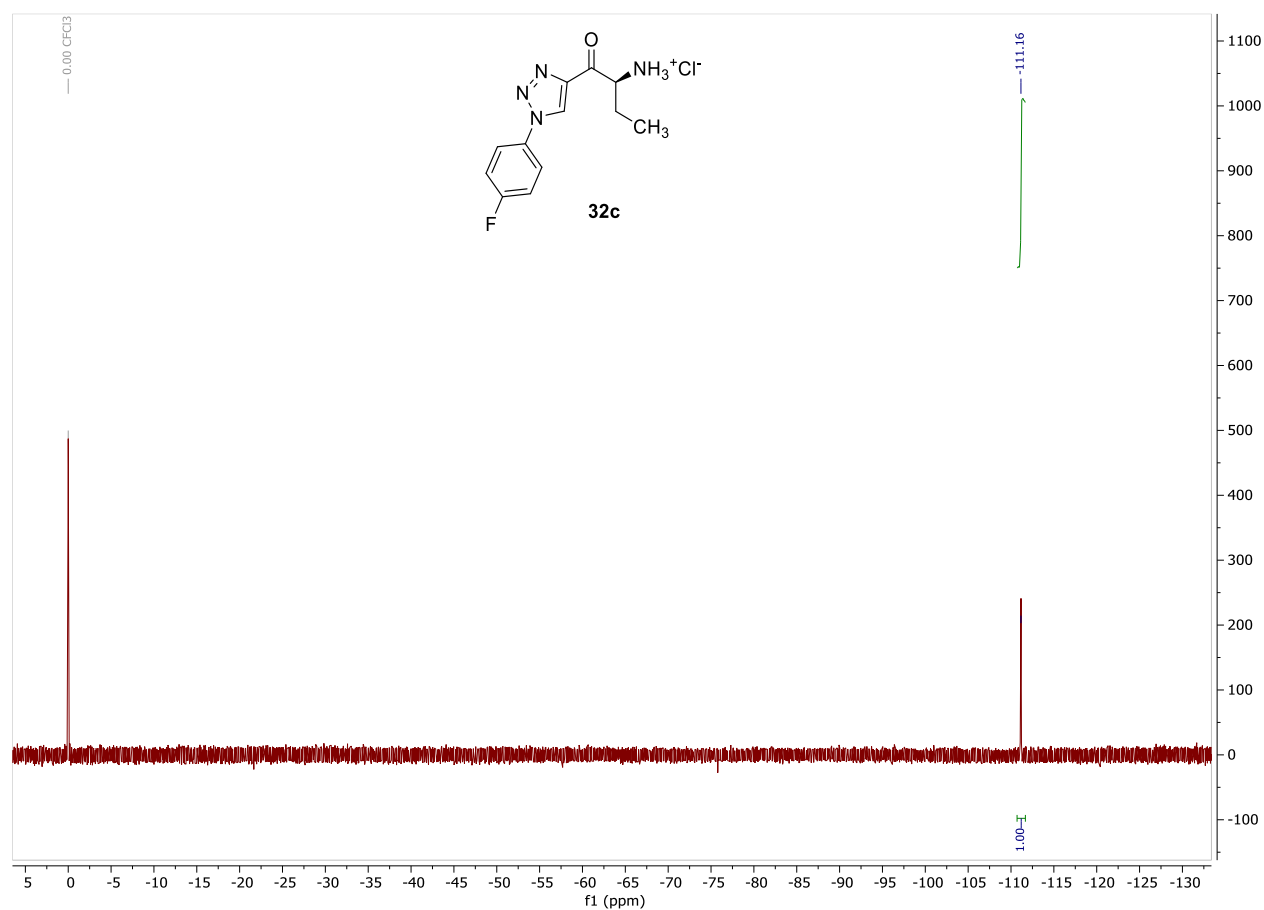

Compound **11** ( $^1\text{H}$  NMR, 400 MHz):

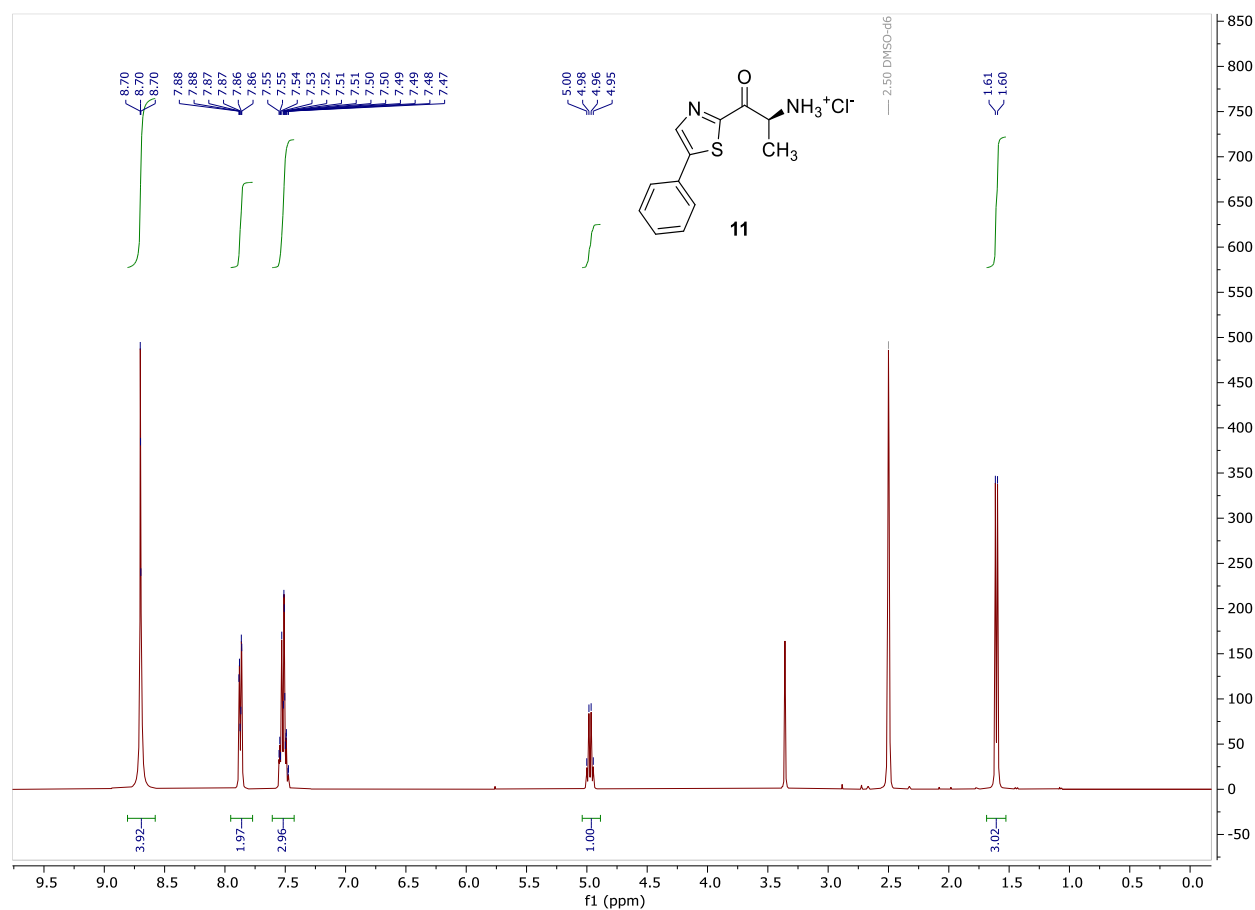

Compound **11** ( $^{13}\text{C}$  NMR, 101 MHz):

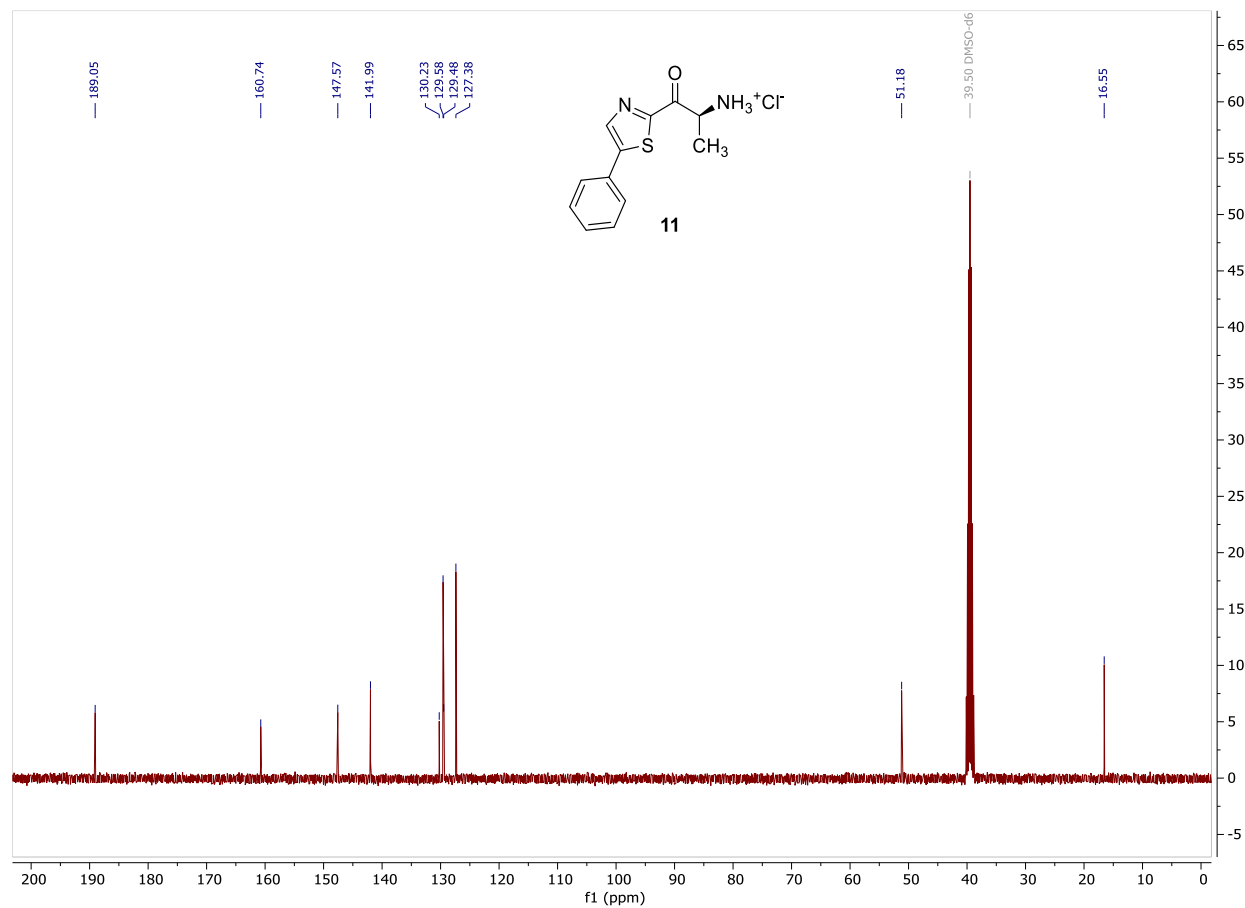

Compound **25a** ( $^1\text{H}$  NMR, 400 MHz):

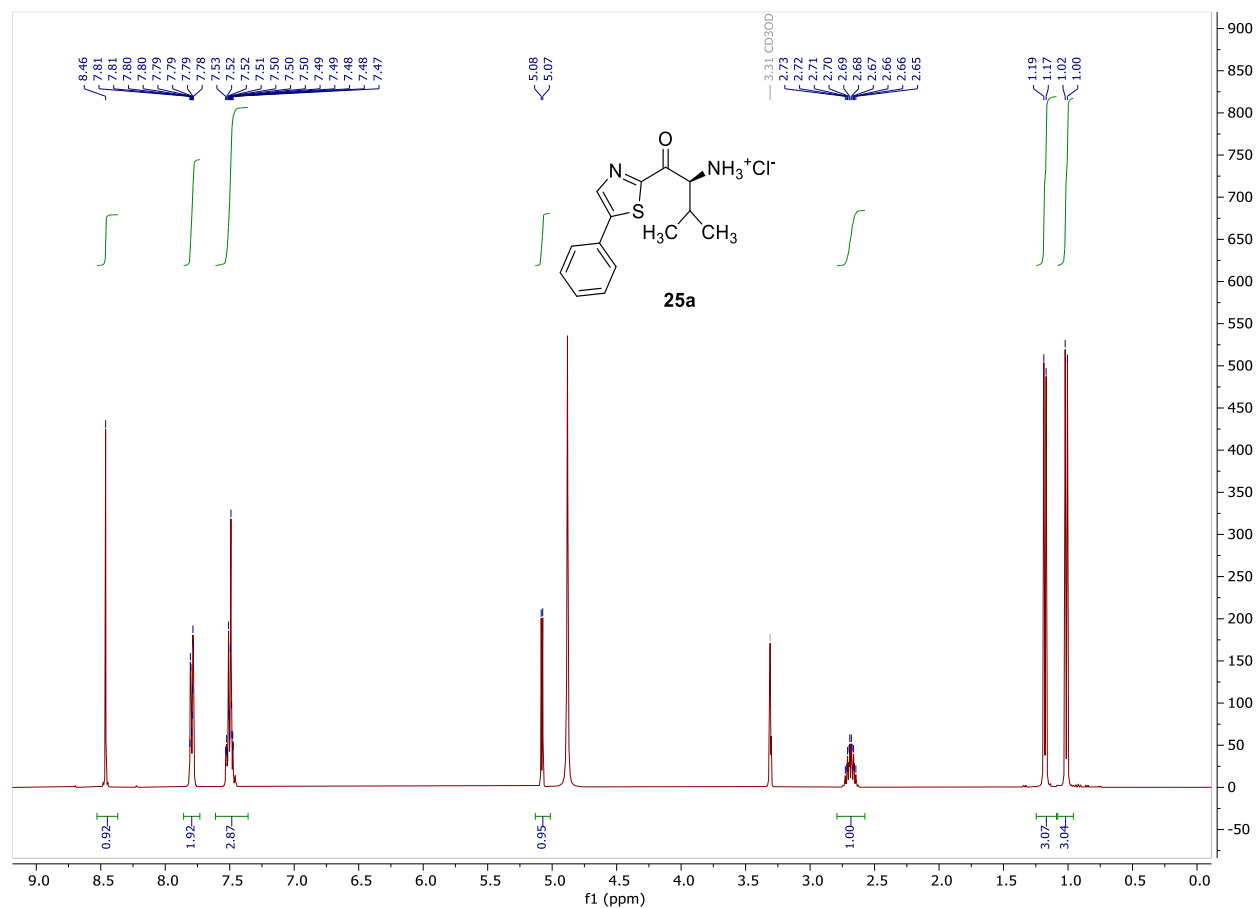

Compound **25a** ( $^{13}\text{C}$  NMR, 101 MHz):

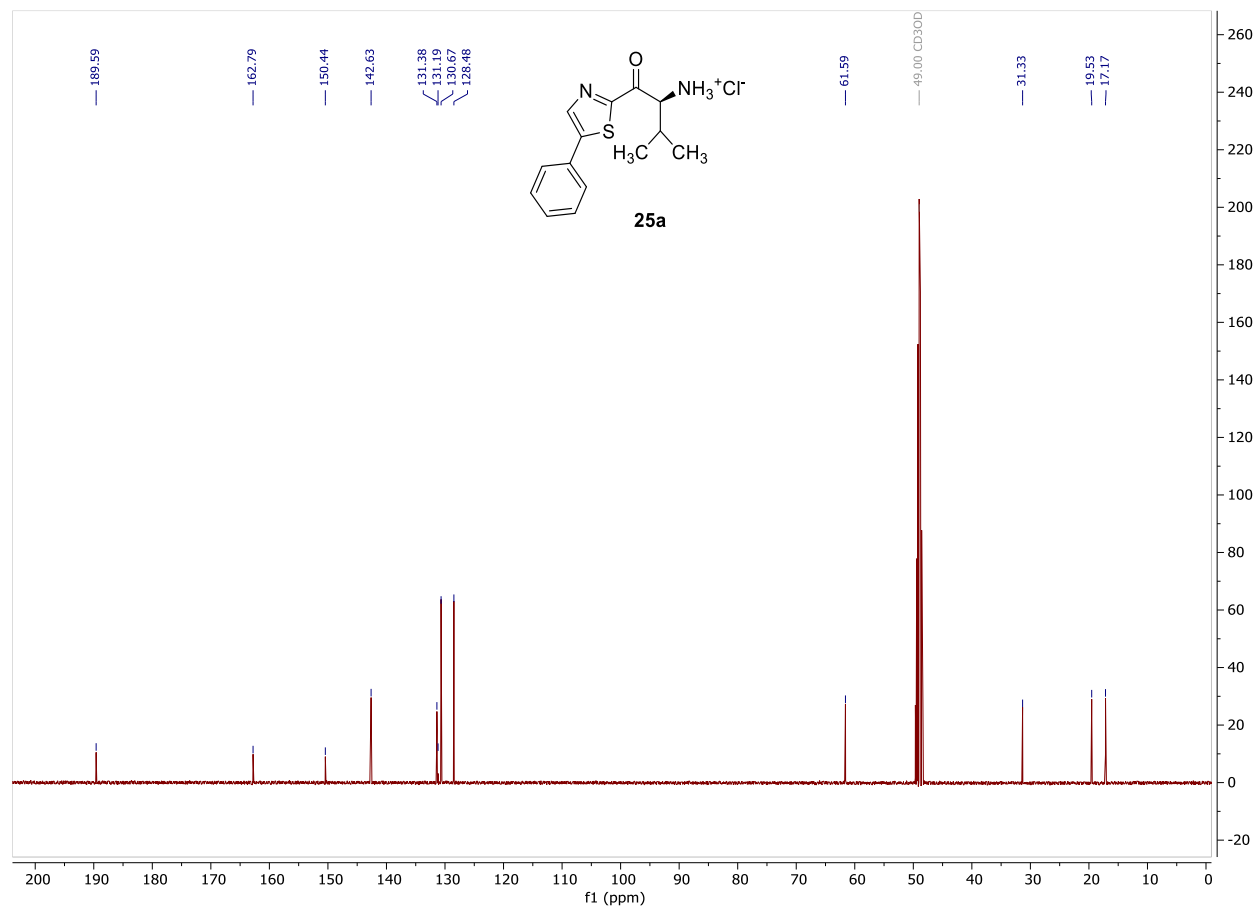

Compound **25b** ( $^1\text{H}$  NMR, 400 MHz):

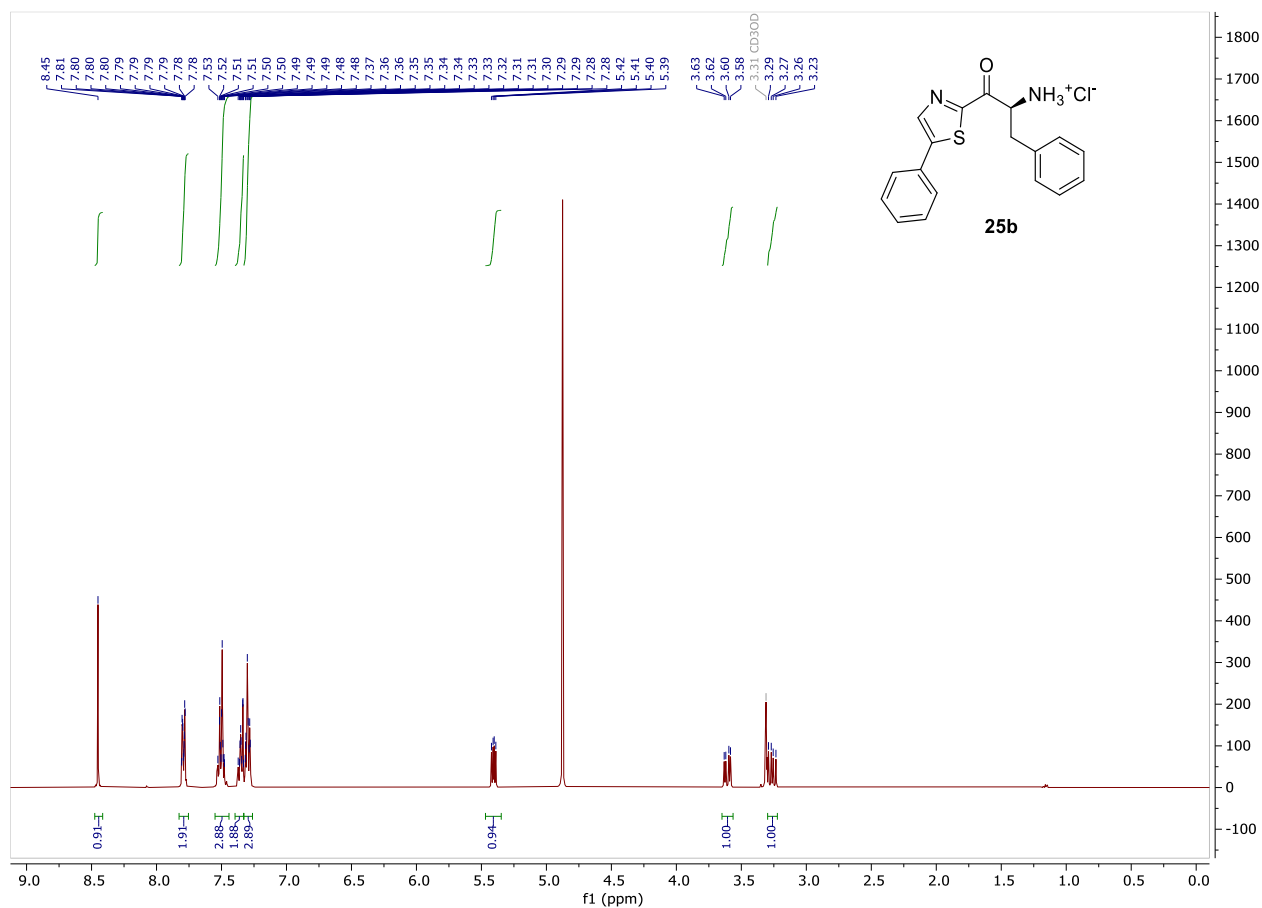

Compound **25b** ( $^{13}\text{C}$  NMR, 101 MHz):

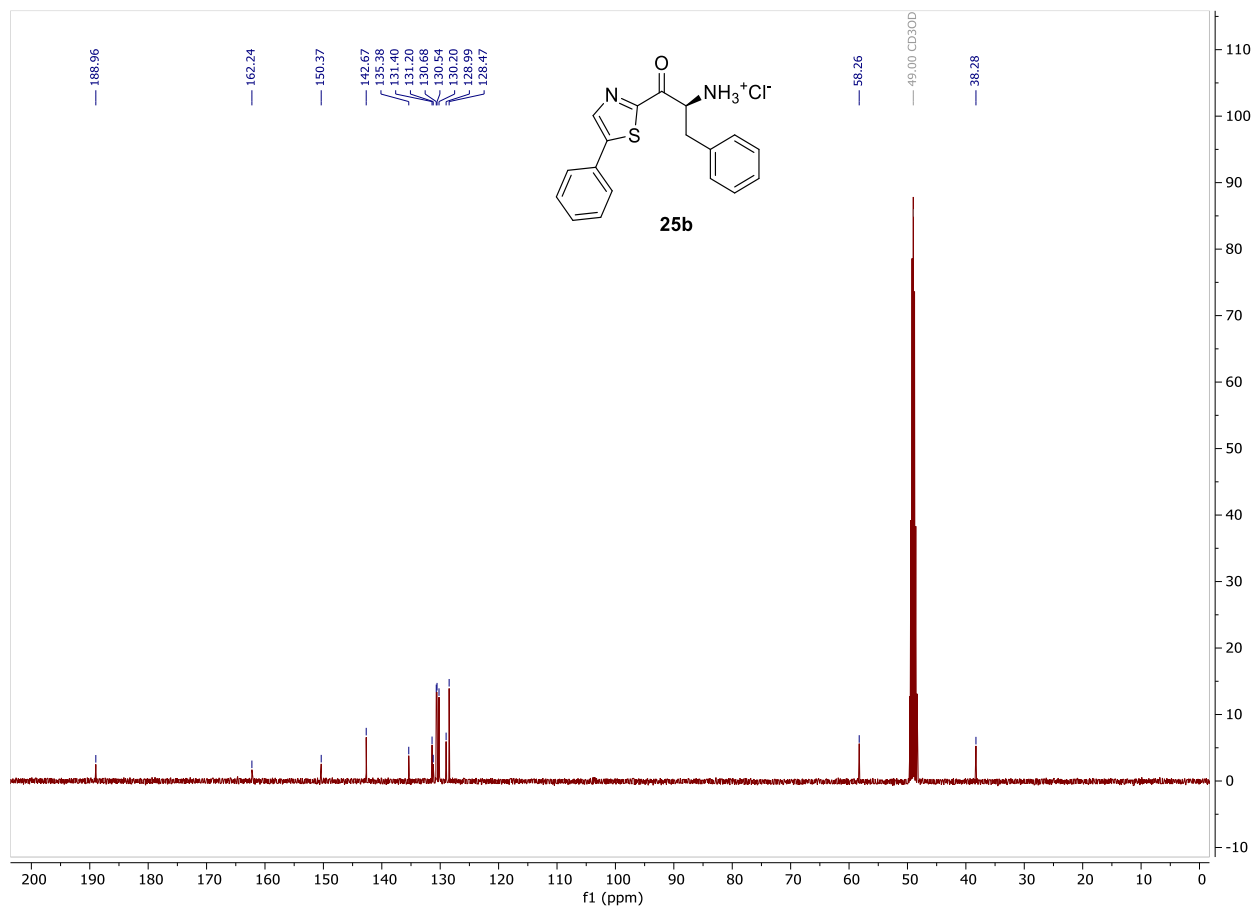

Compound **25c** ( $^1\text{H}$  NMR, 400 MHz):

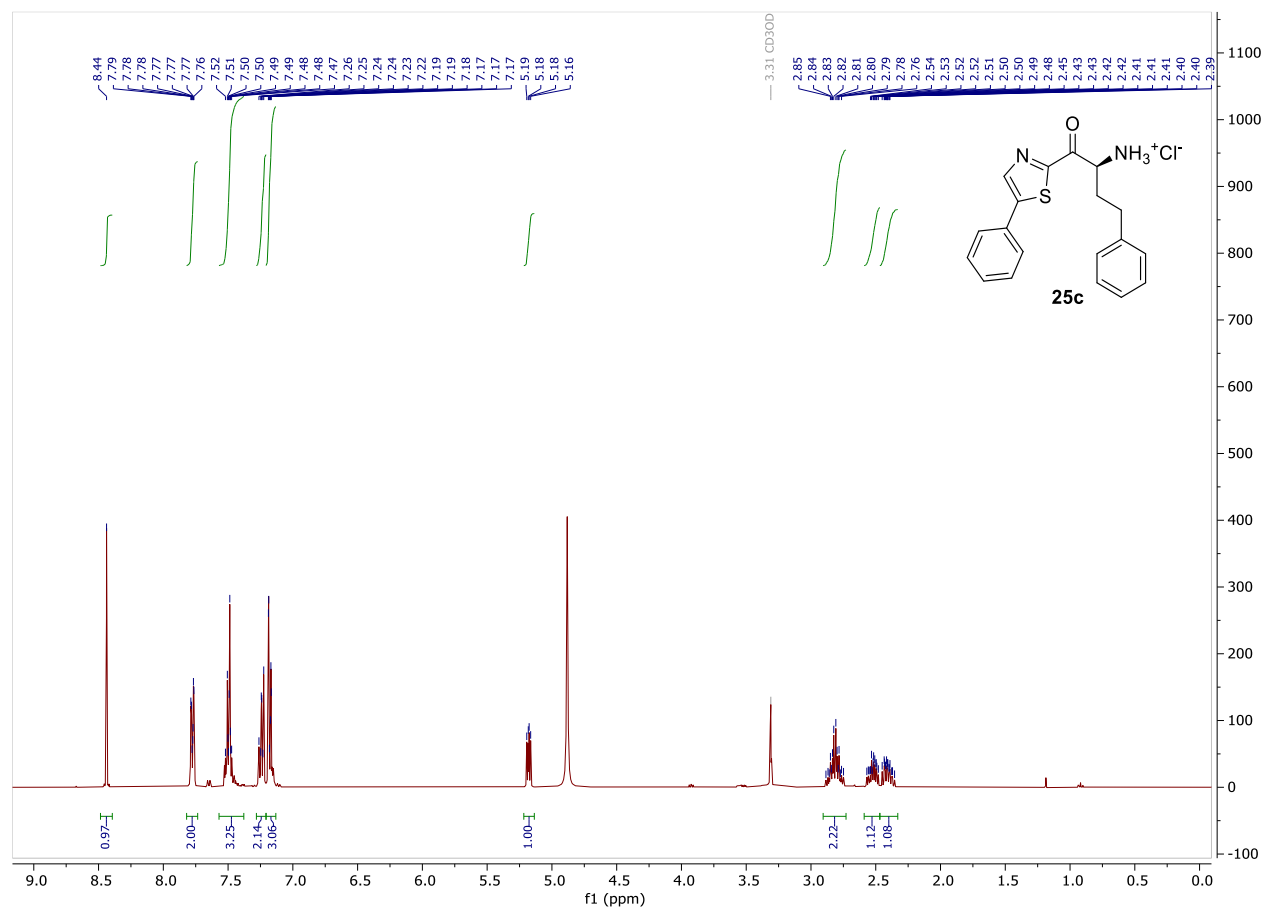

Compound **25c** ( $^{13}\text{C}$  NMR, 101 MHz):

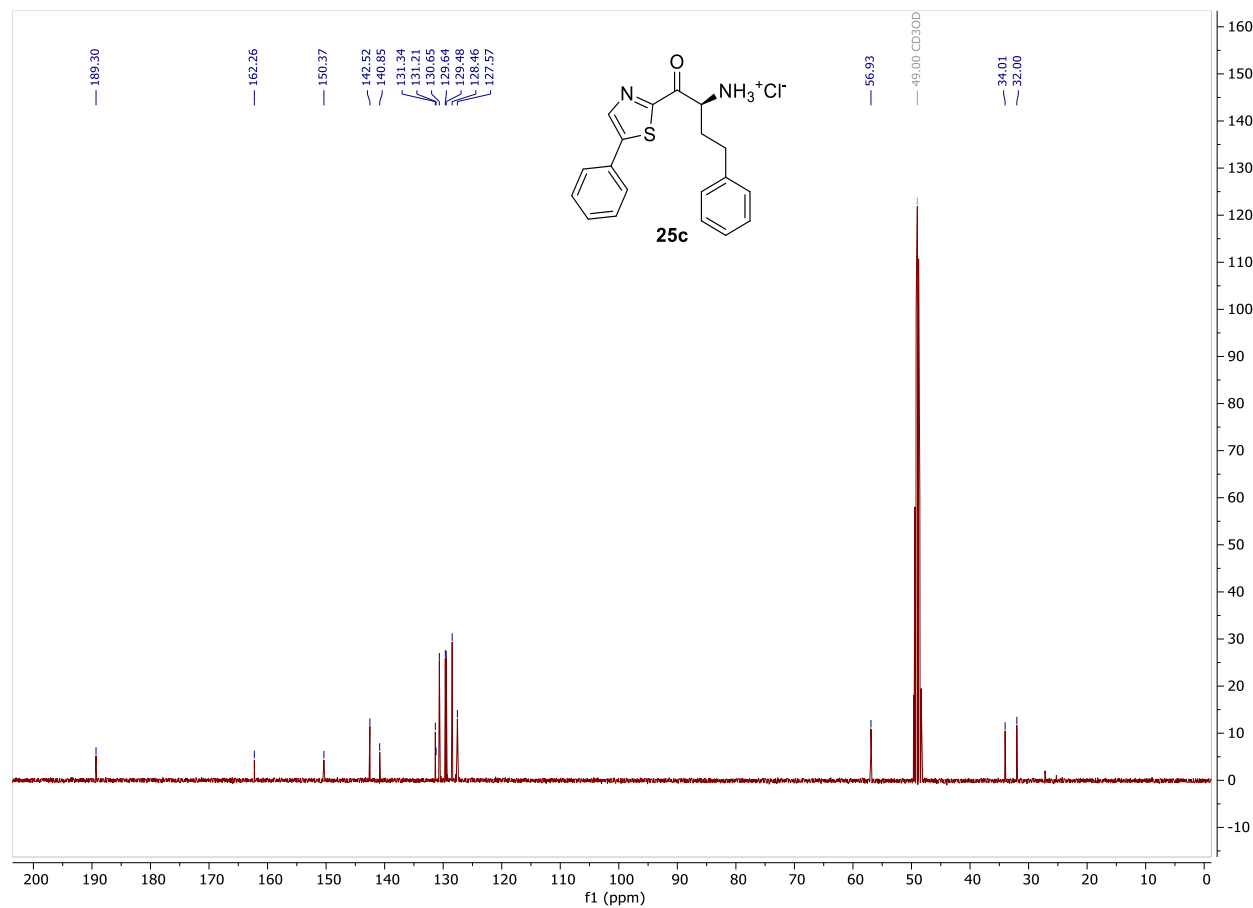

Compound **25d** ( $^1\text{H}$  NMR, 400 MHz):

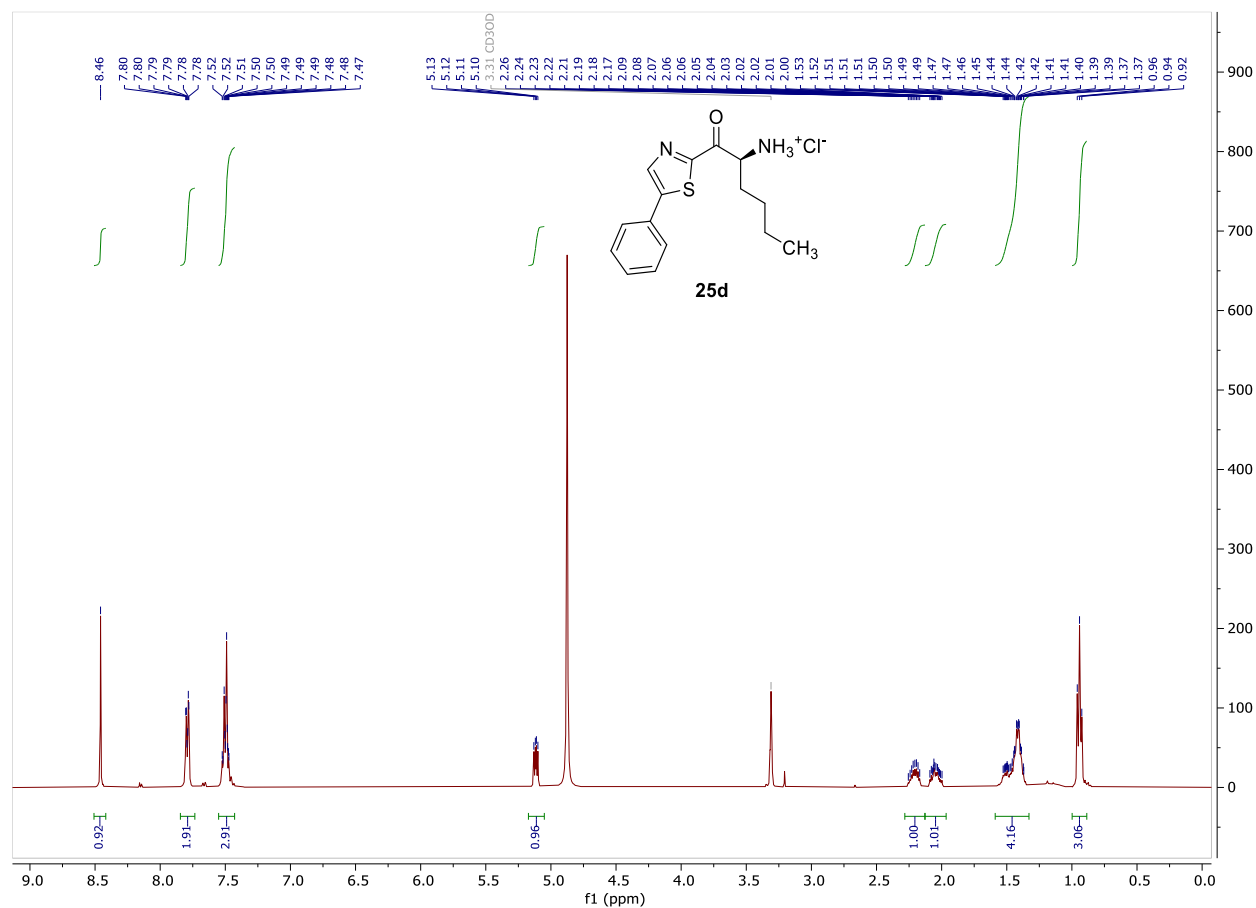

Compound **25d** ( $^{13}\text{C}$  NMR, 101 MHz):

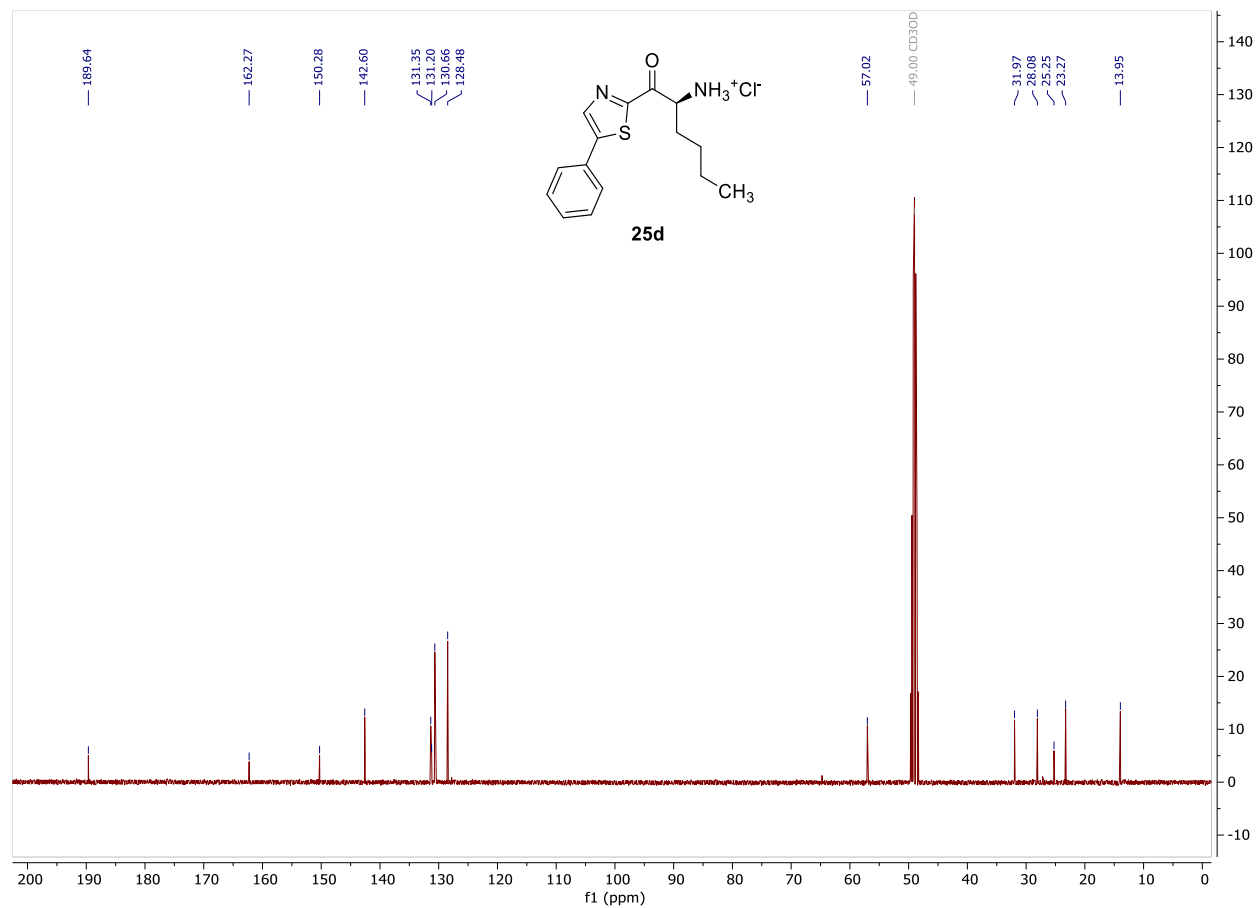

Compound **25e** ( $^1\text{H}$  NMR, 400 MHz):

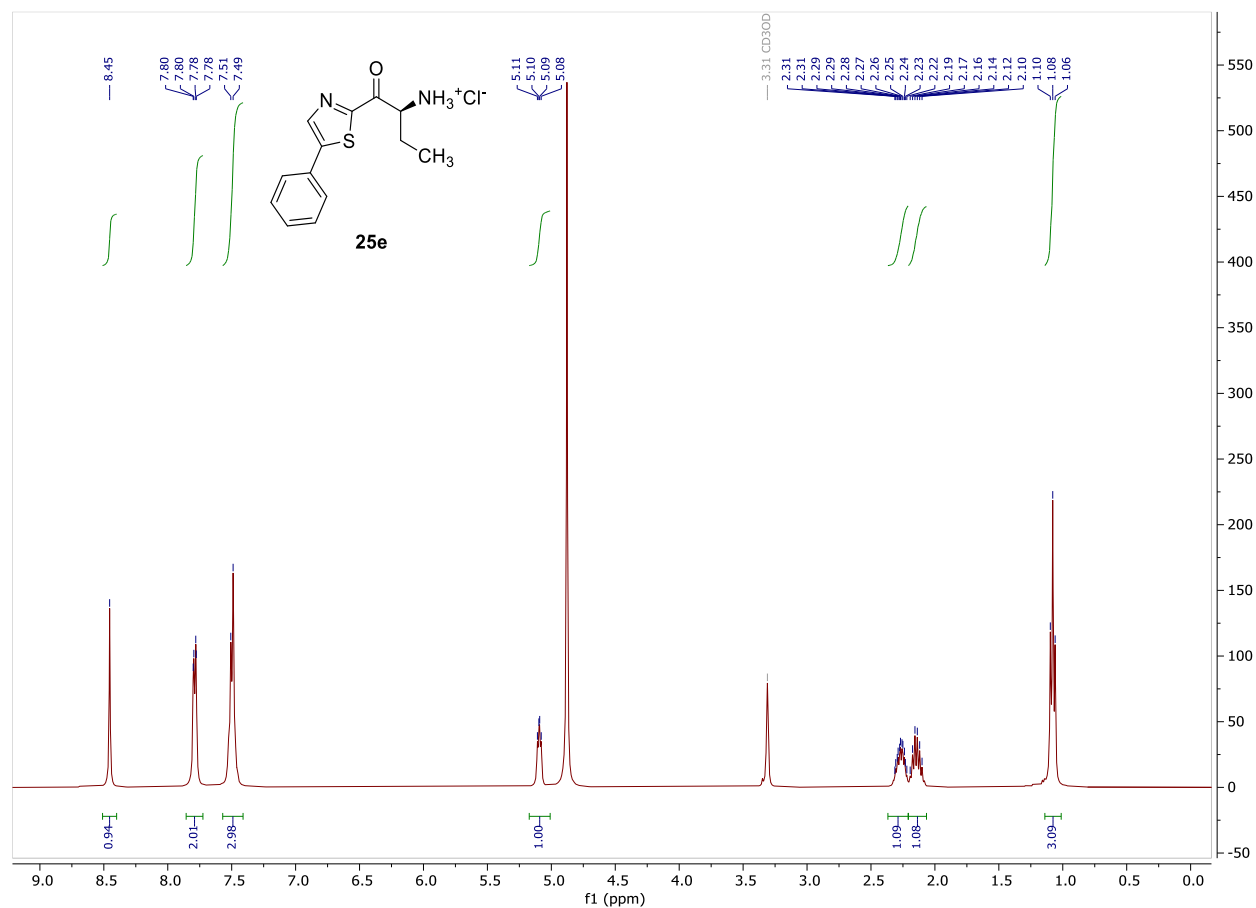

Compound **25e** ( $^{13}\text{C}$  NMR, 101 MHz):

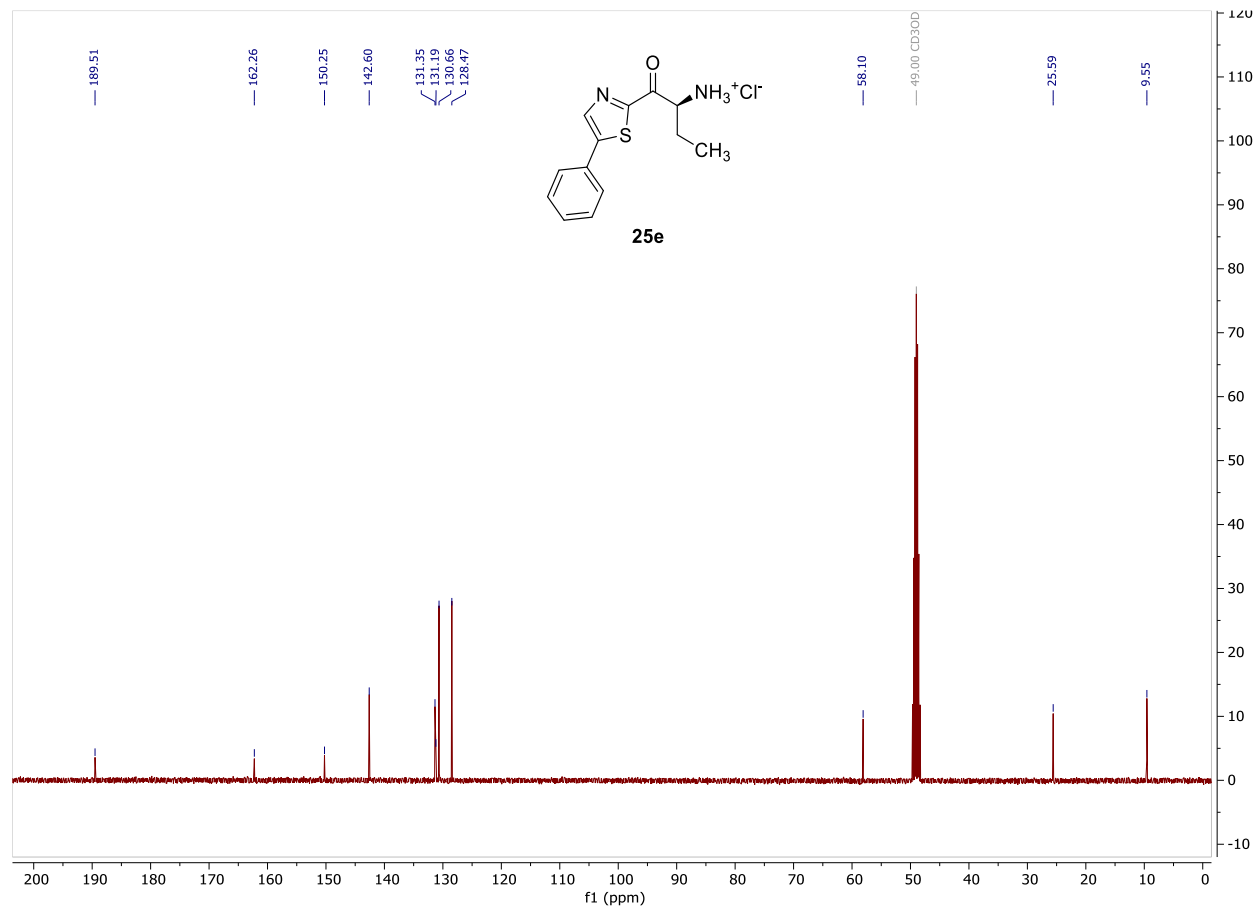

Compound **25f** ( $^1\text{H}$  NMR, 400 MHz):

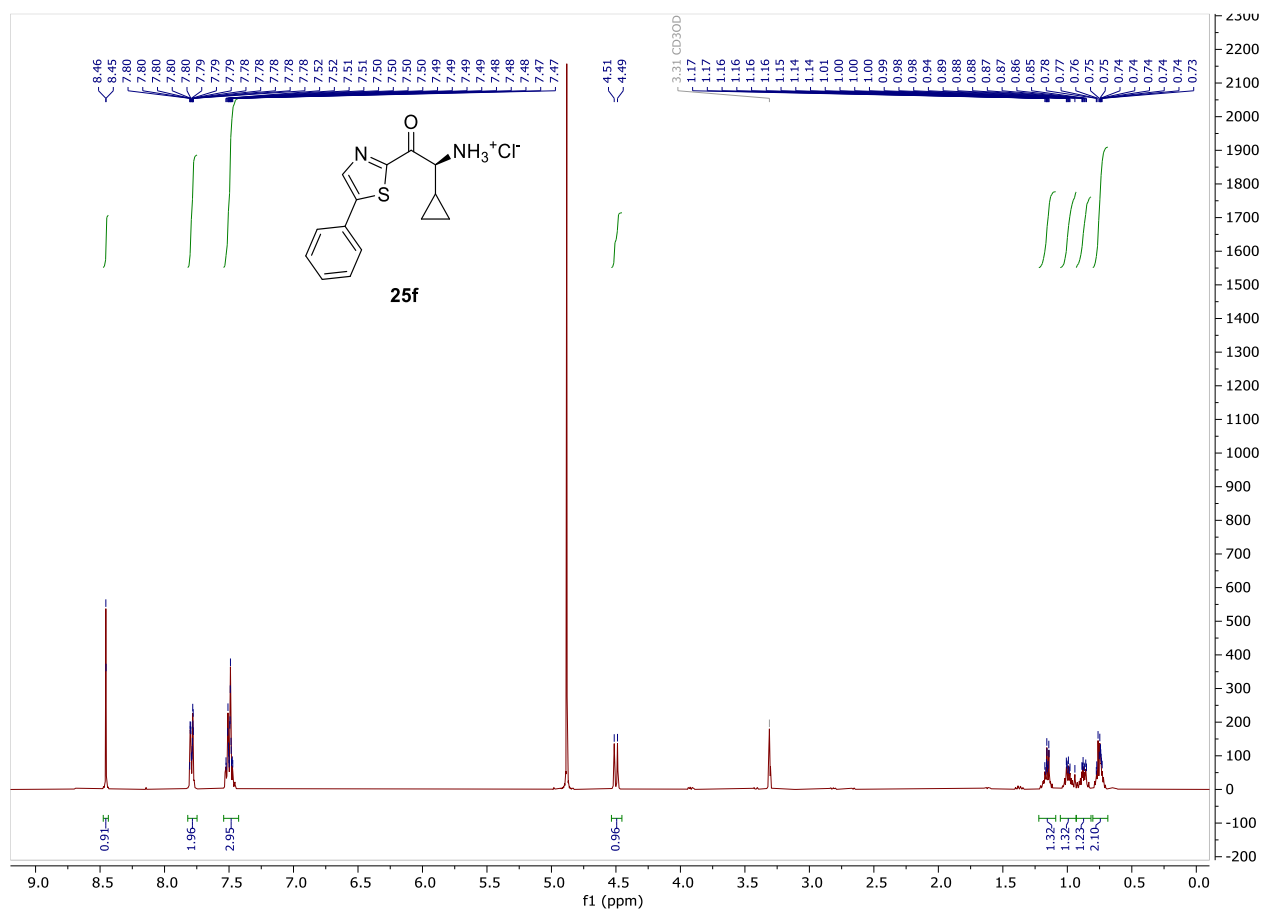

Compound **25f** ( $^{13}\text{C}$  NMR, 101 MHz):

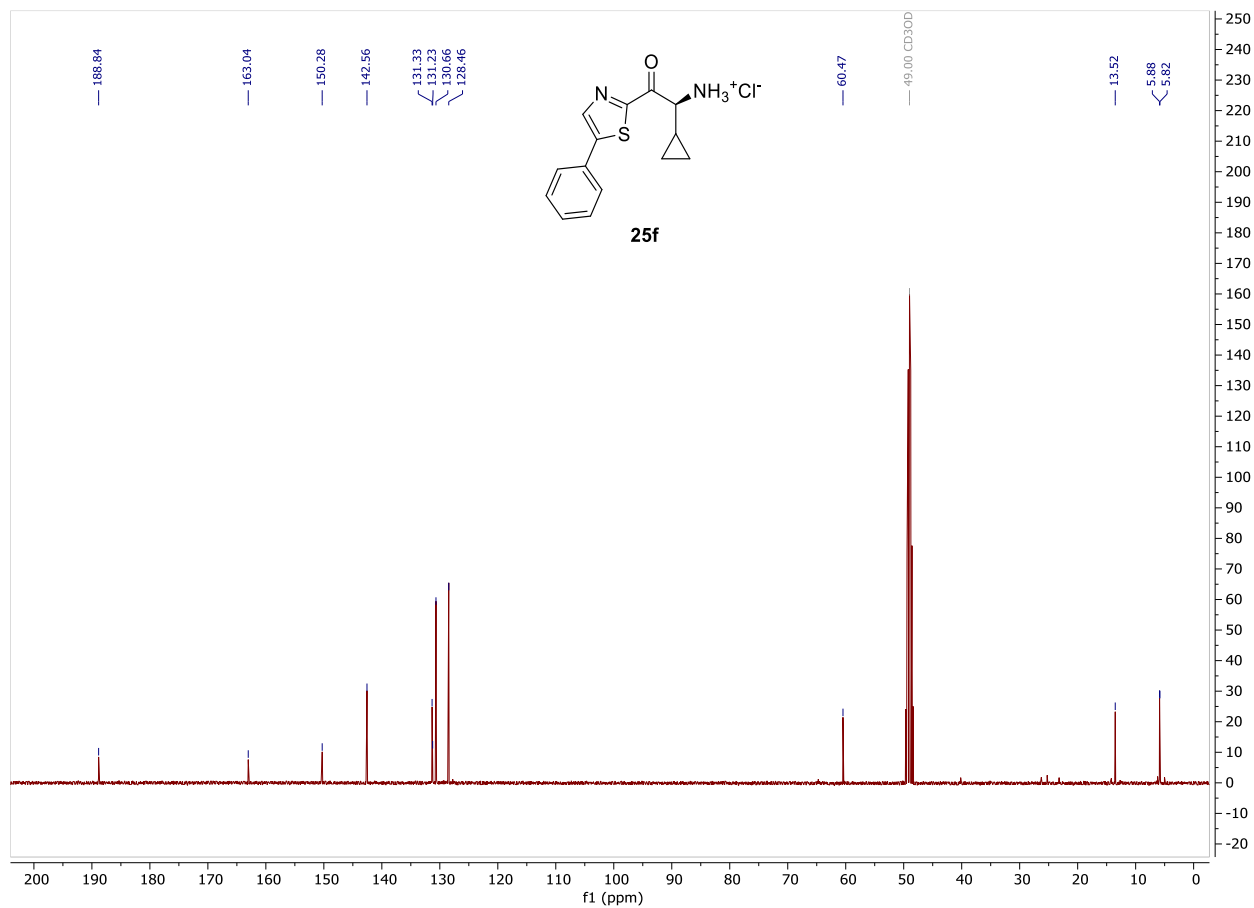



Compound **34a** ( $^1\text{H}$  NMR, 400 MHz):

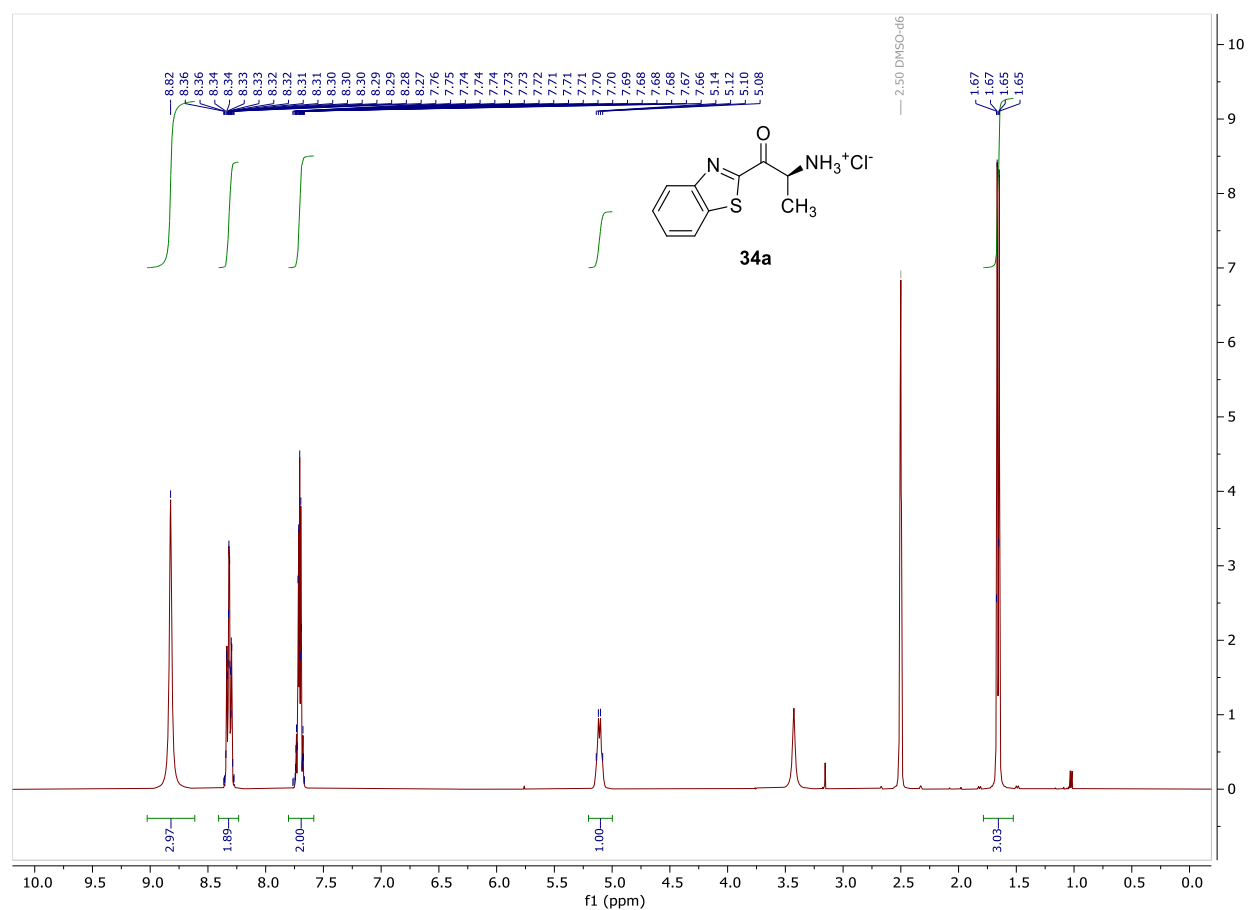

Compound **34a** ( $^{13}\text{C}$  NMR, 101 MHz):

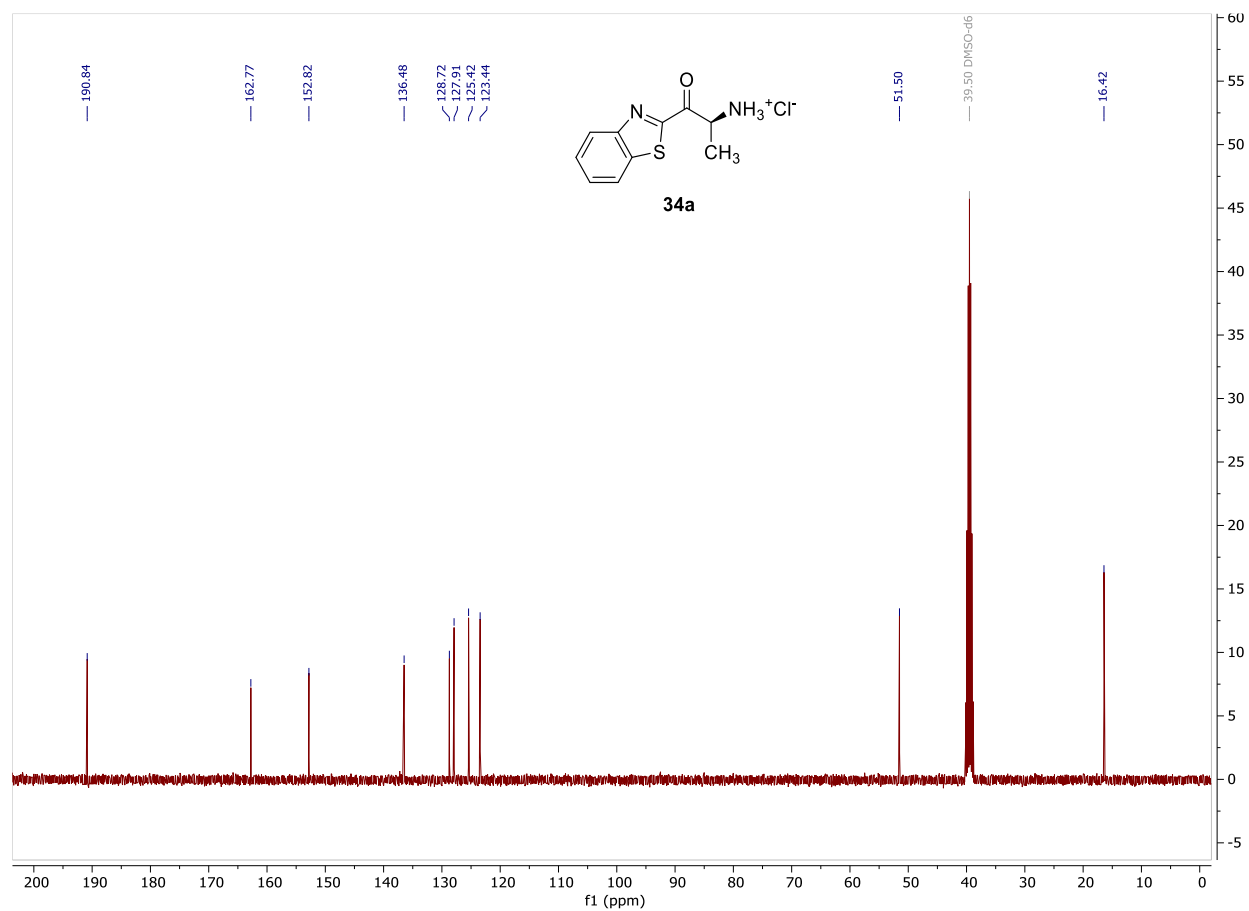

Compound **34b** ( $^1\text{H}$  NMR, 400 MHz):

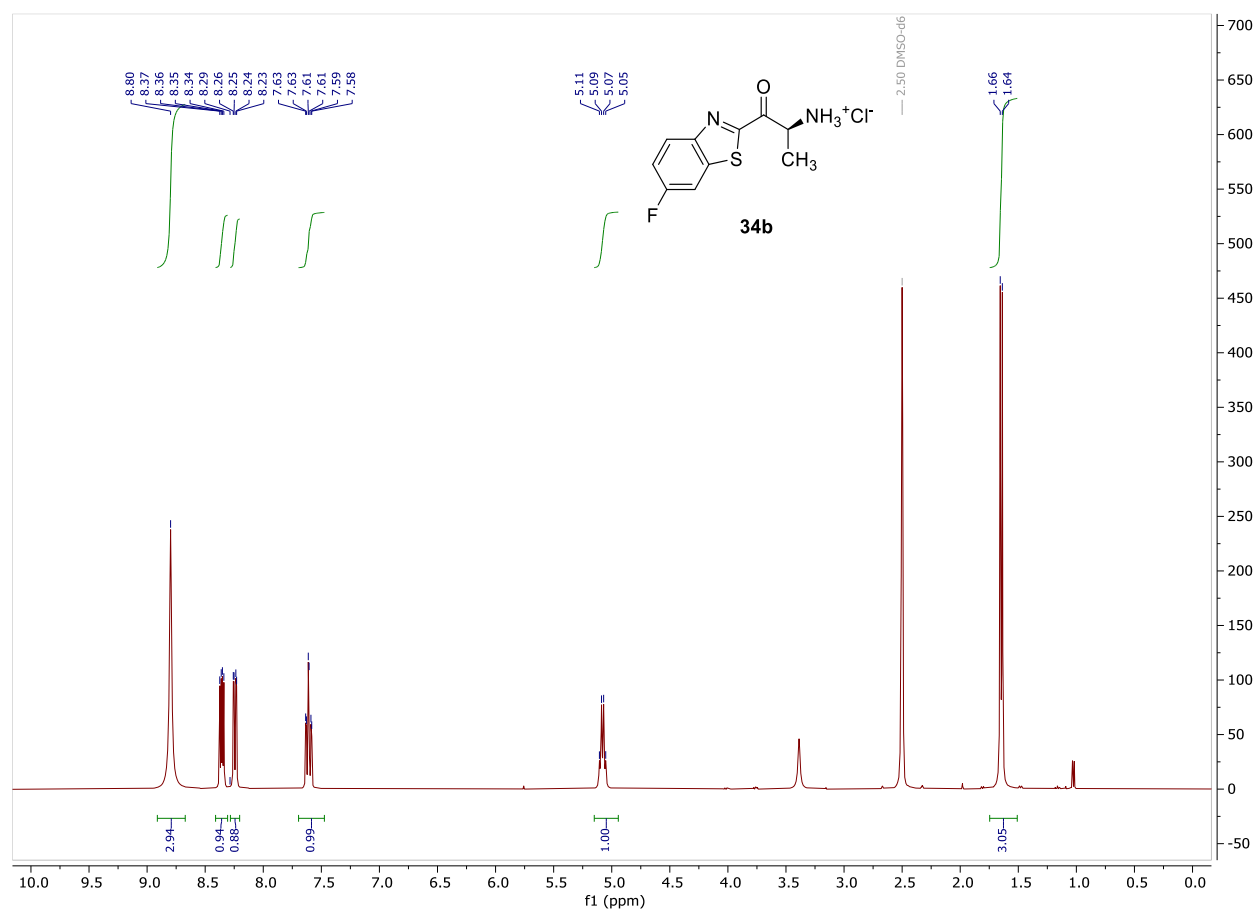

Compound **34b** ( $^{13}\text{C}$  NMR, 101 MHz):

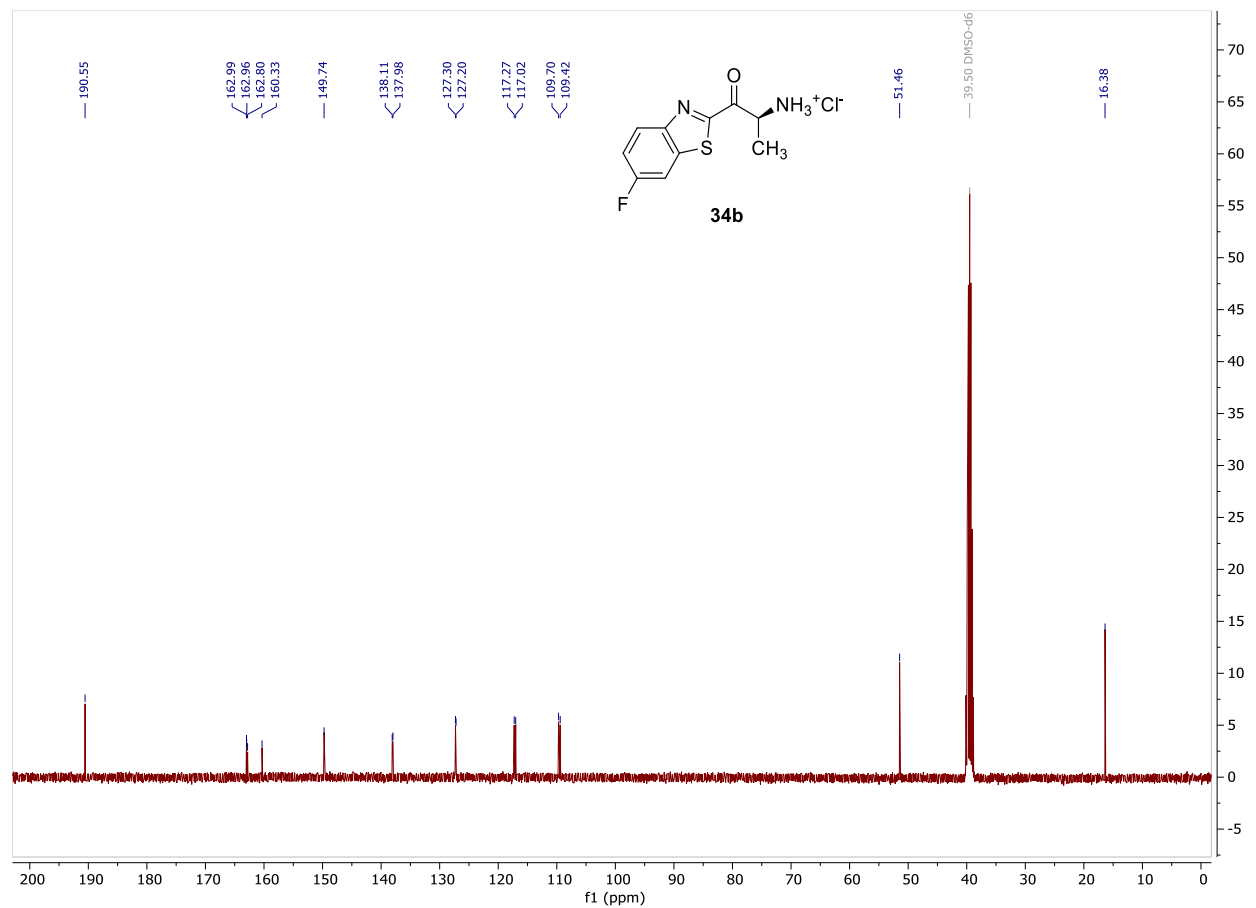

Compound **34b** ( $^{19}\text{F}$  NMR, 282 MHz):

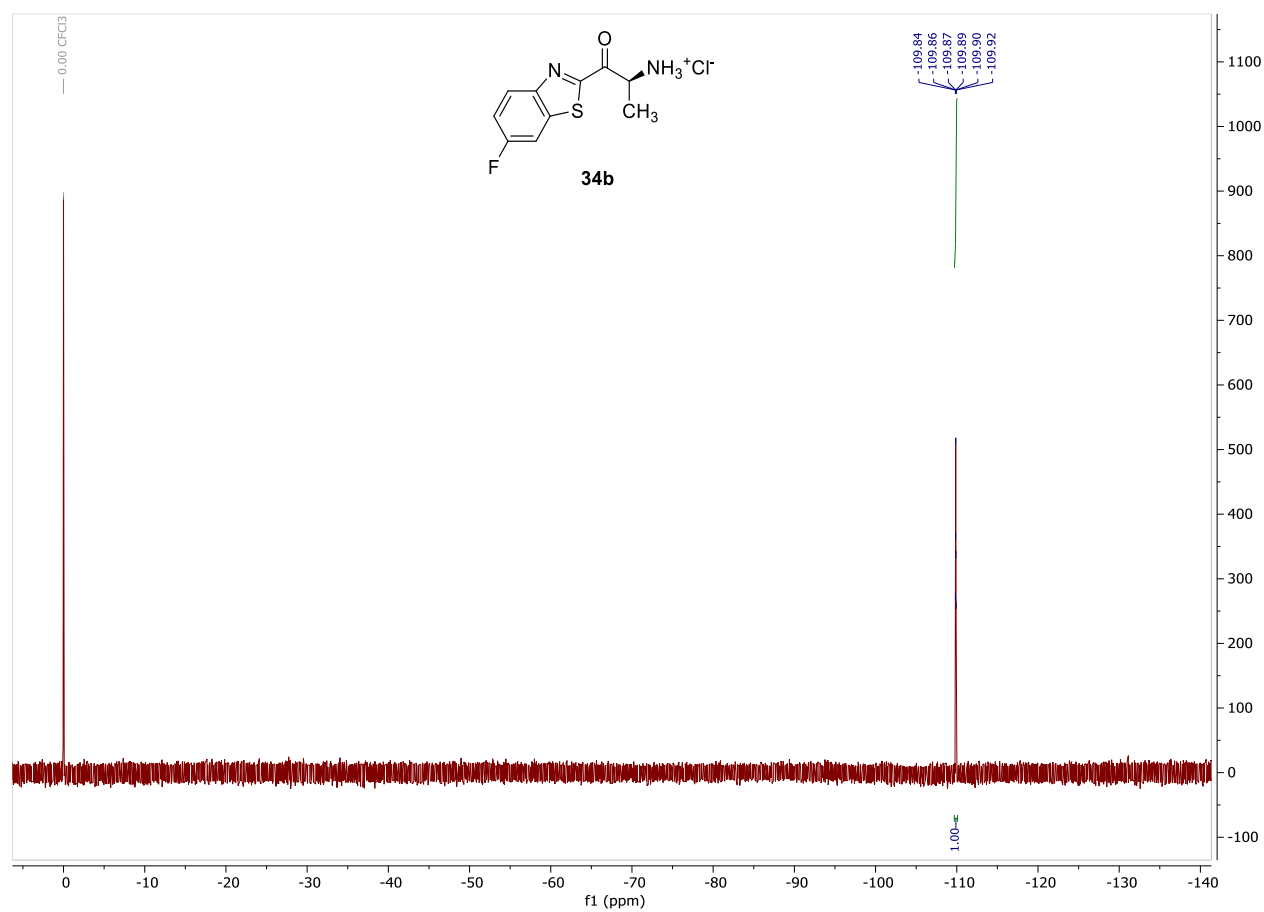

Compound **34c** ( $^1\text{H}$  NMR, 400 MHz):

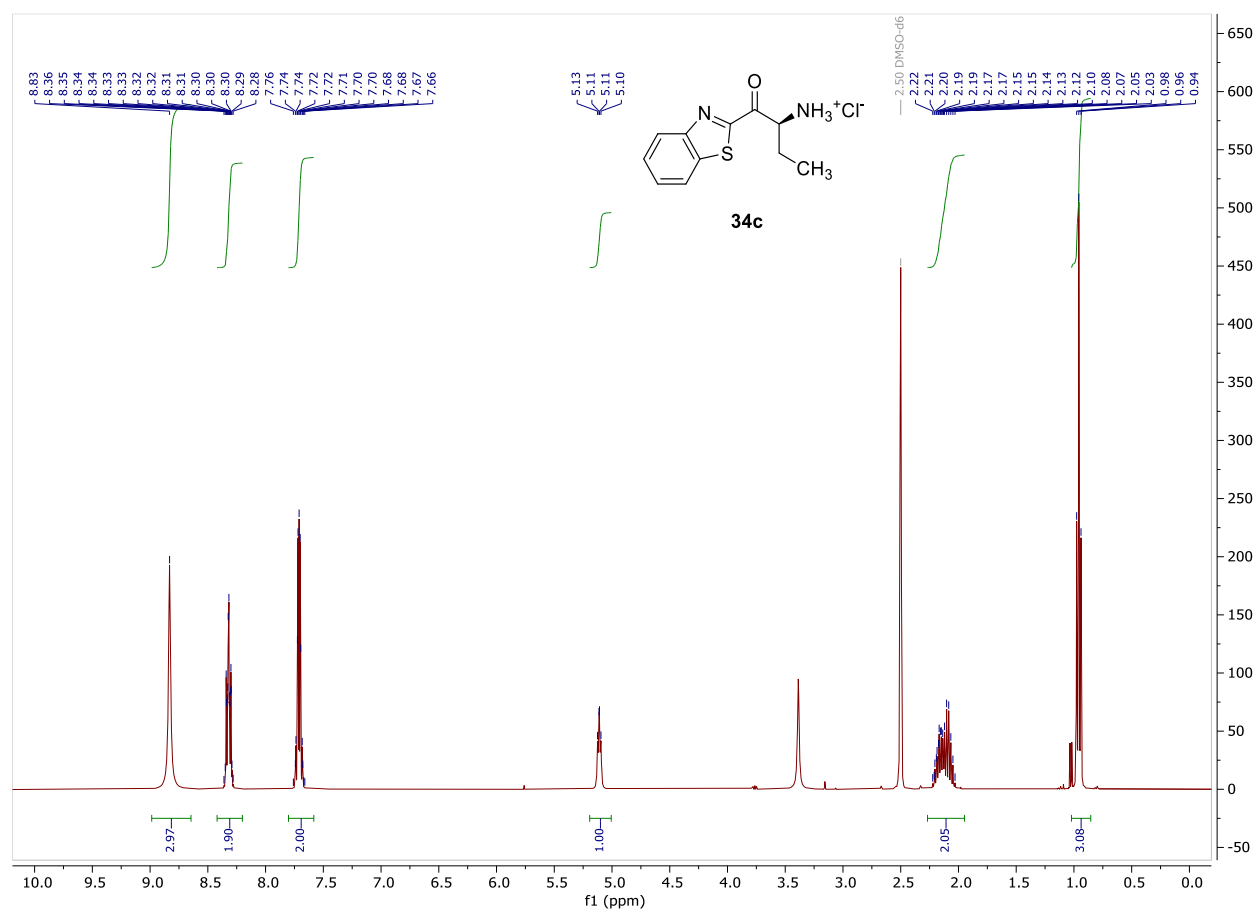

Compound **34c** ( $^{13}\text{C}$  NMR, 101 MHz):

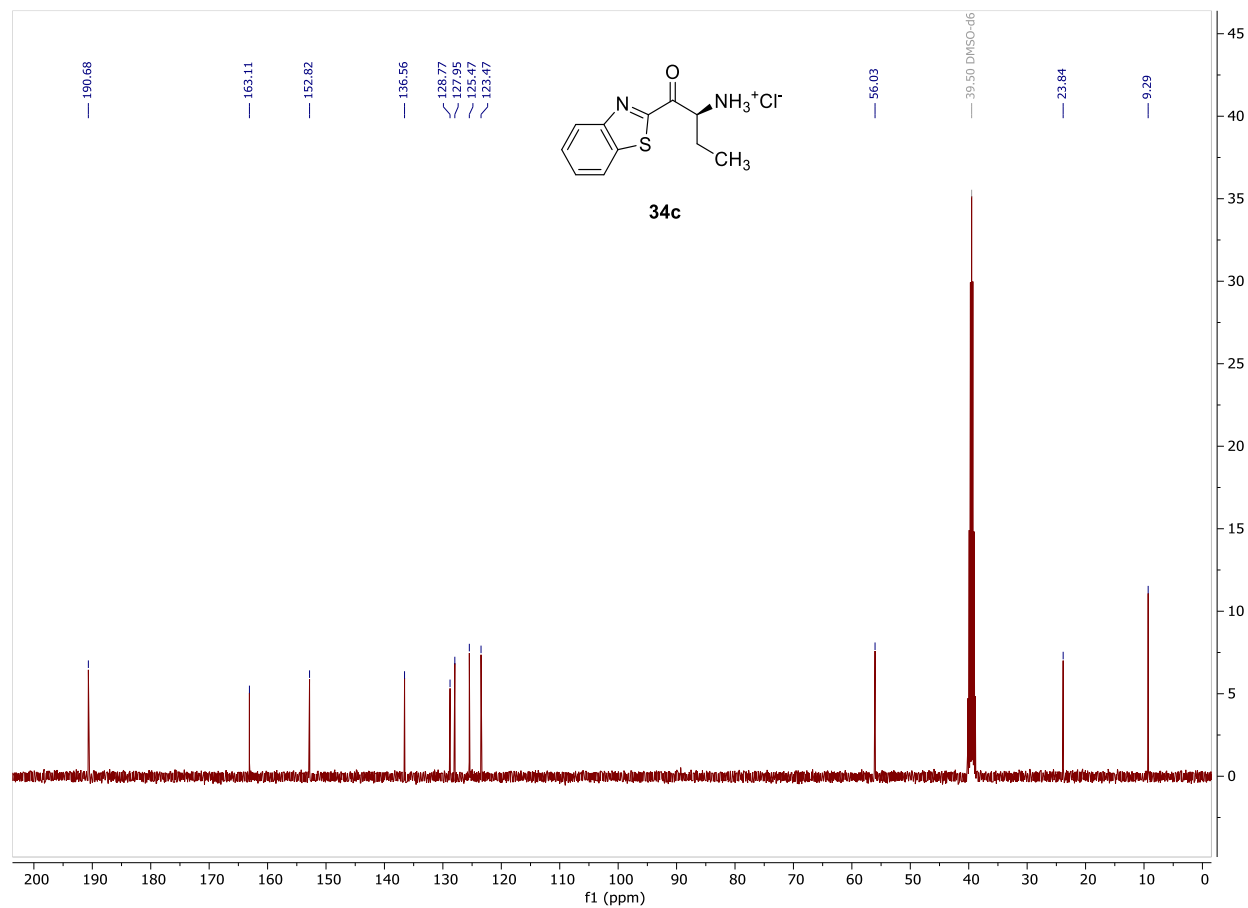

Compound **34d** ( $^1\text{H}$  NMR, 400 MHz):

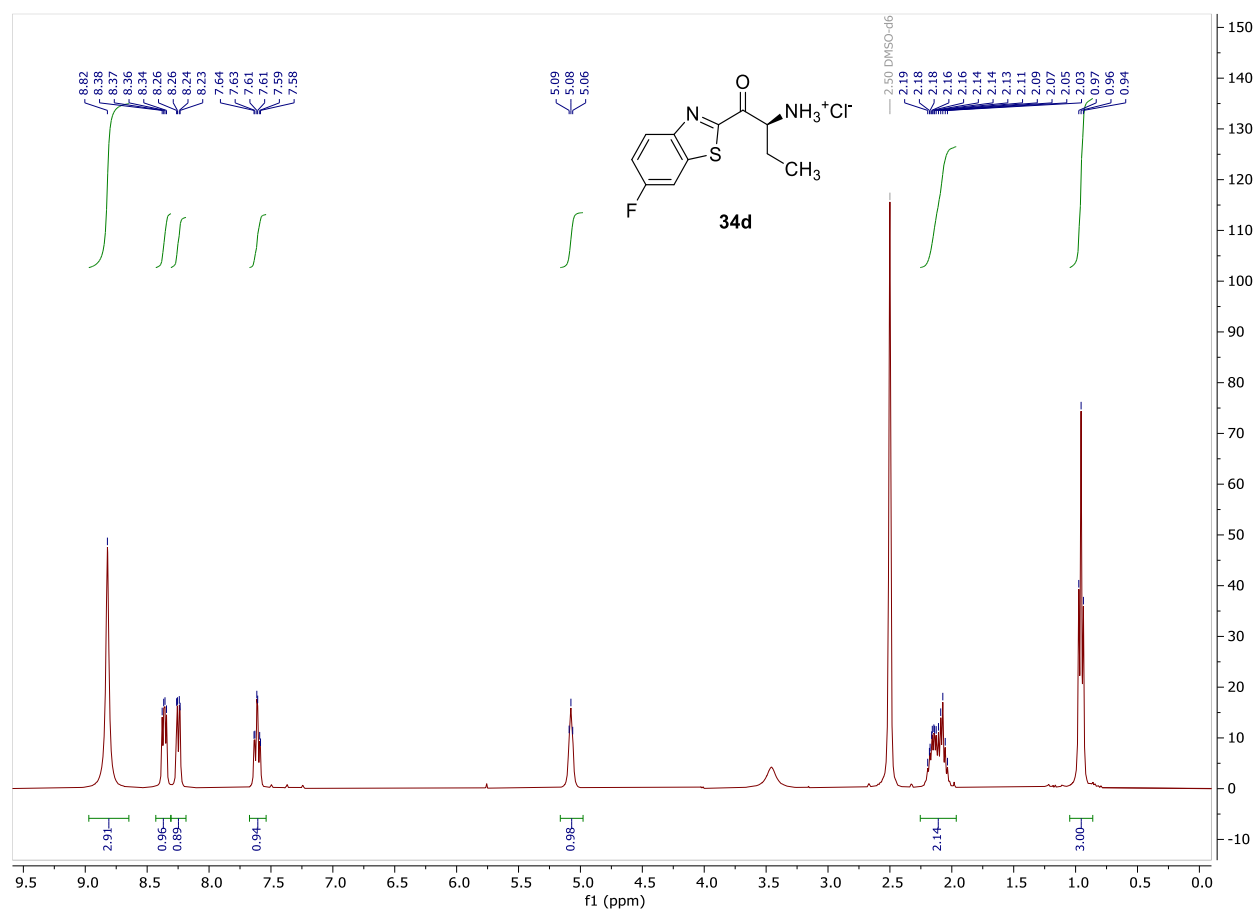

Compound **34d** ( $^{13}\text{C}$  NMR, 101 MHz):

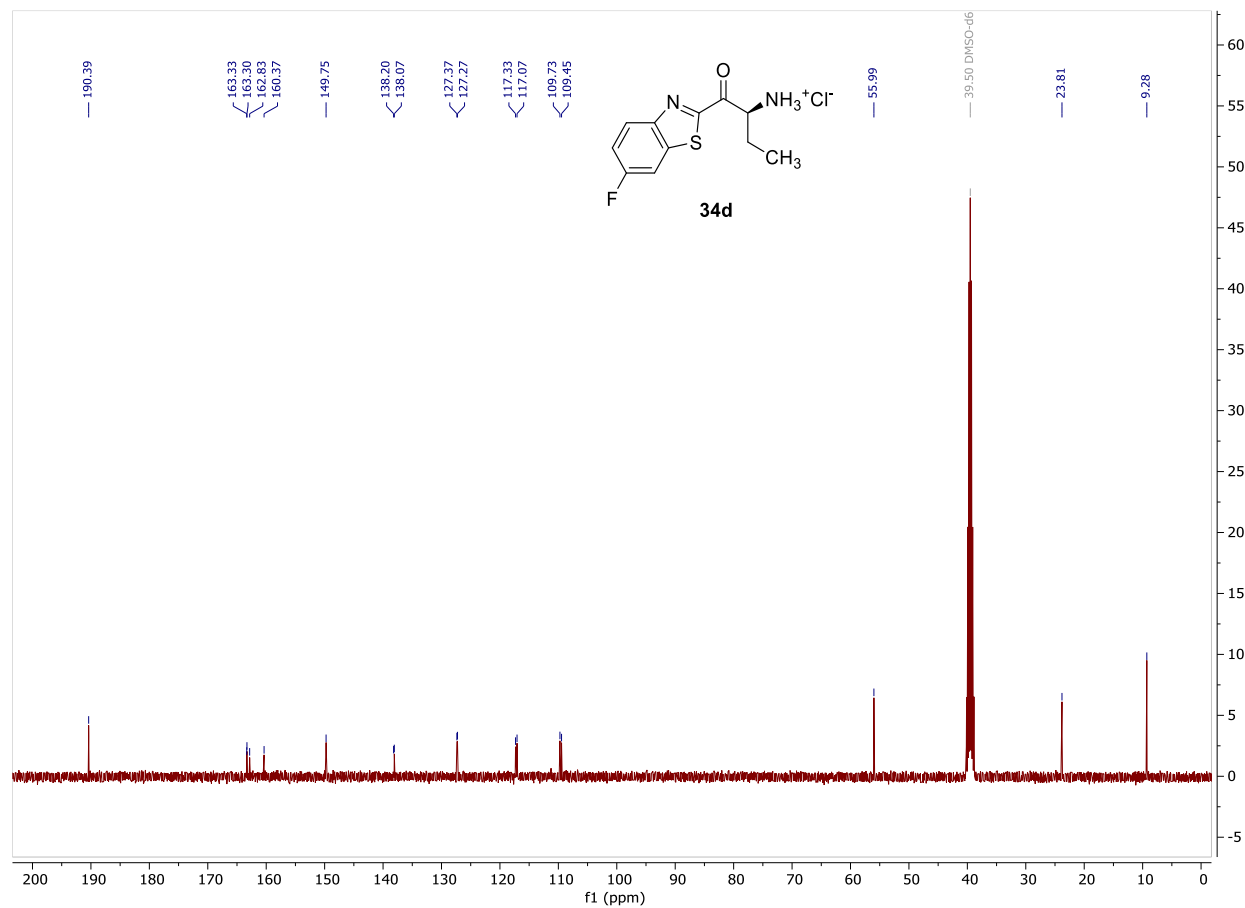

Compound **34d** ( $^{19}\text{F}$  NMR, 282 MHz):

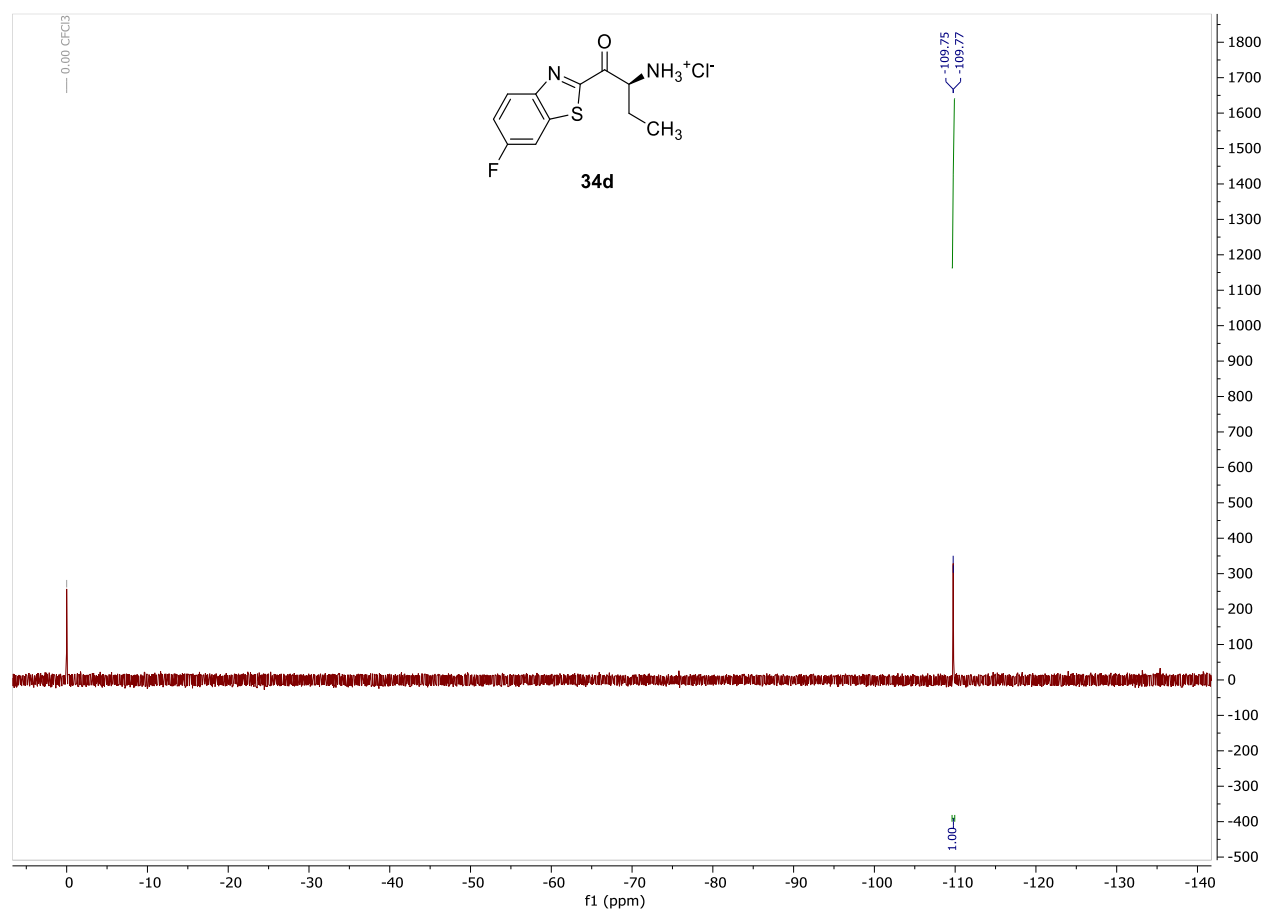

Compound **49a** ( $^1\text{H}$  NMR, 400 MHz):

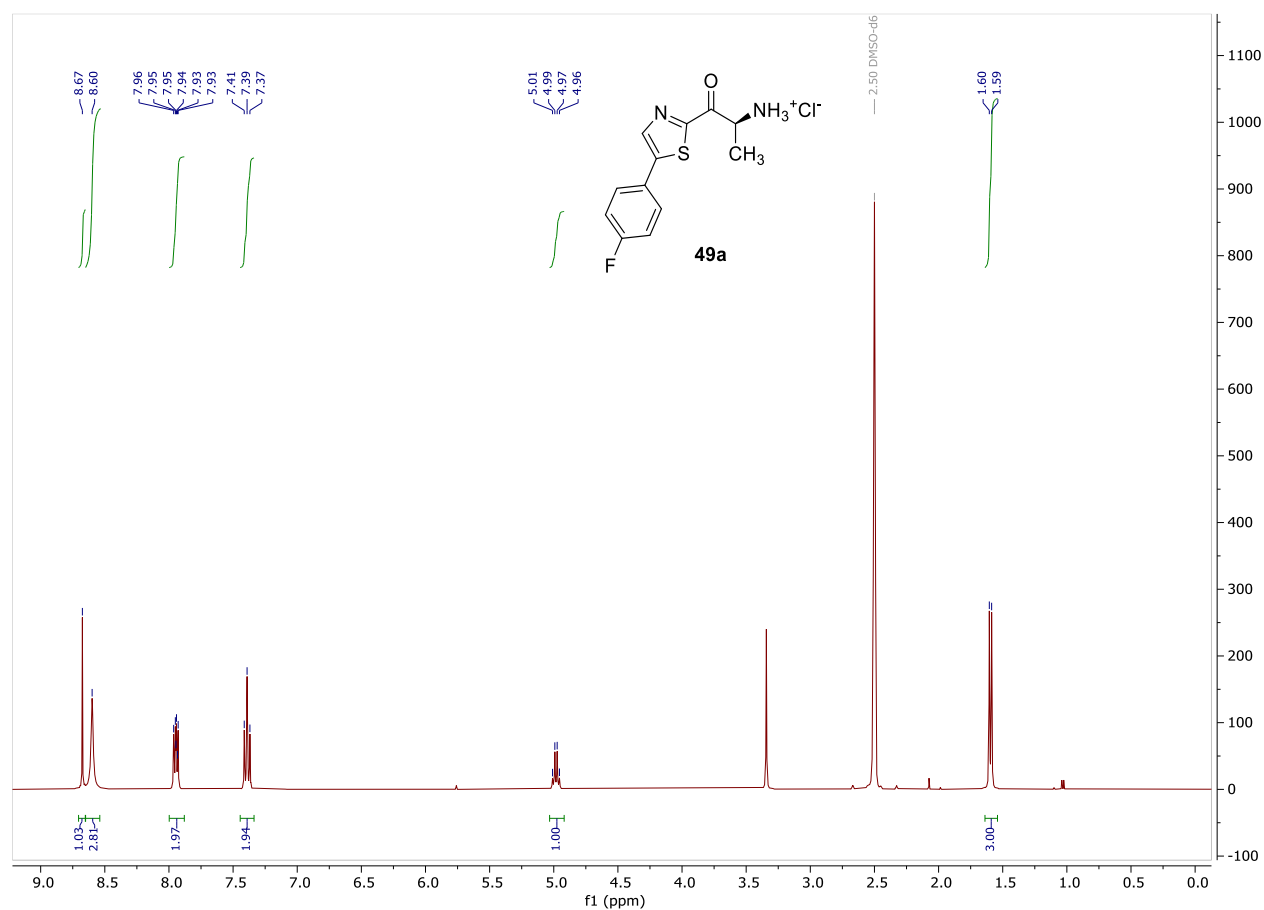

Compound **49a** ( $^{13}\text{C}$  NMR, 101 MHz):

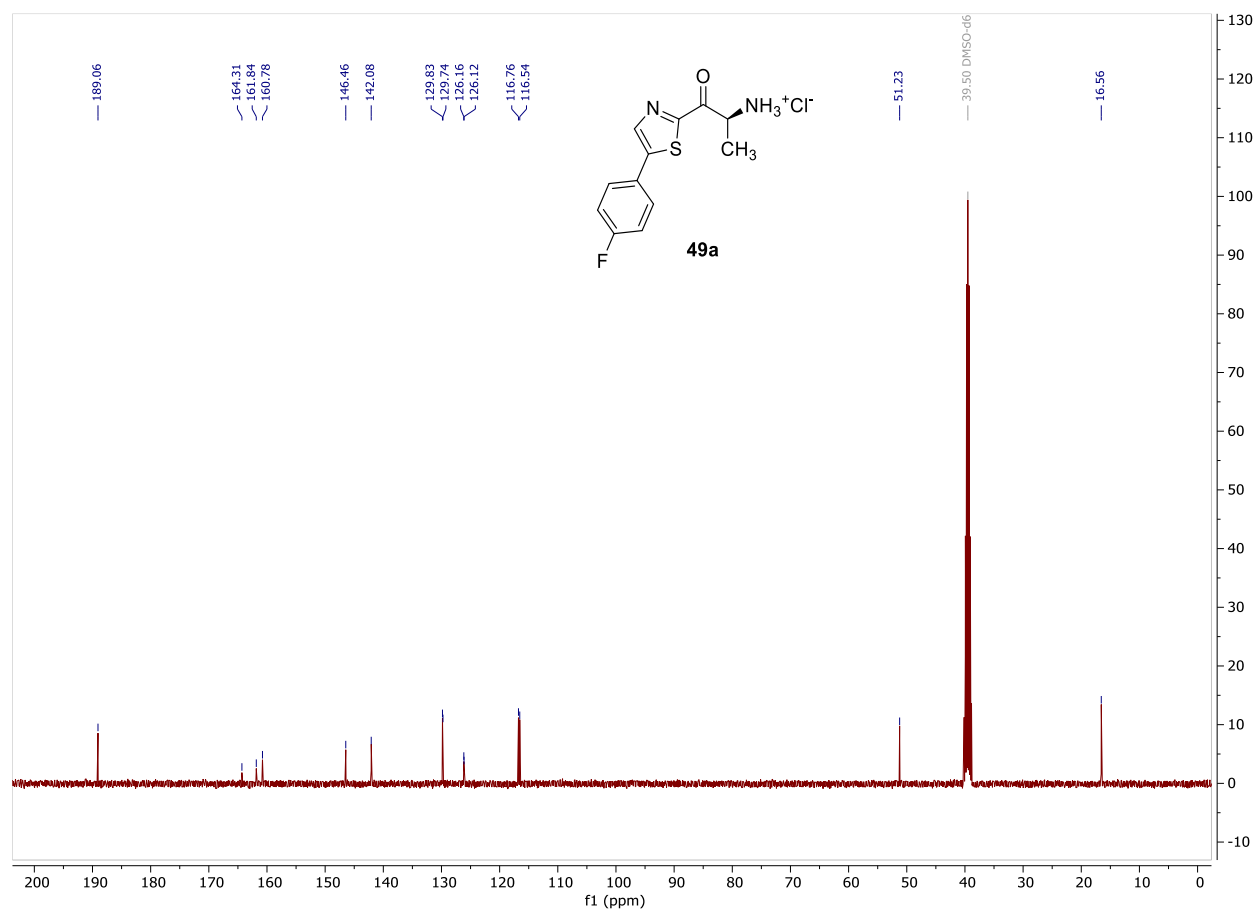

Compound **49a** ( $^{19}\text{F}$  NMR, 282 MHz):

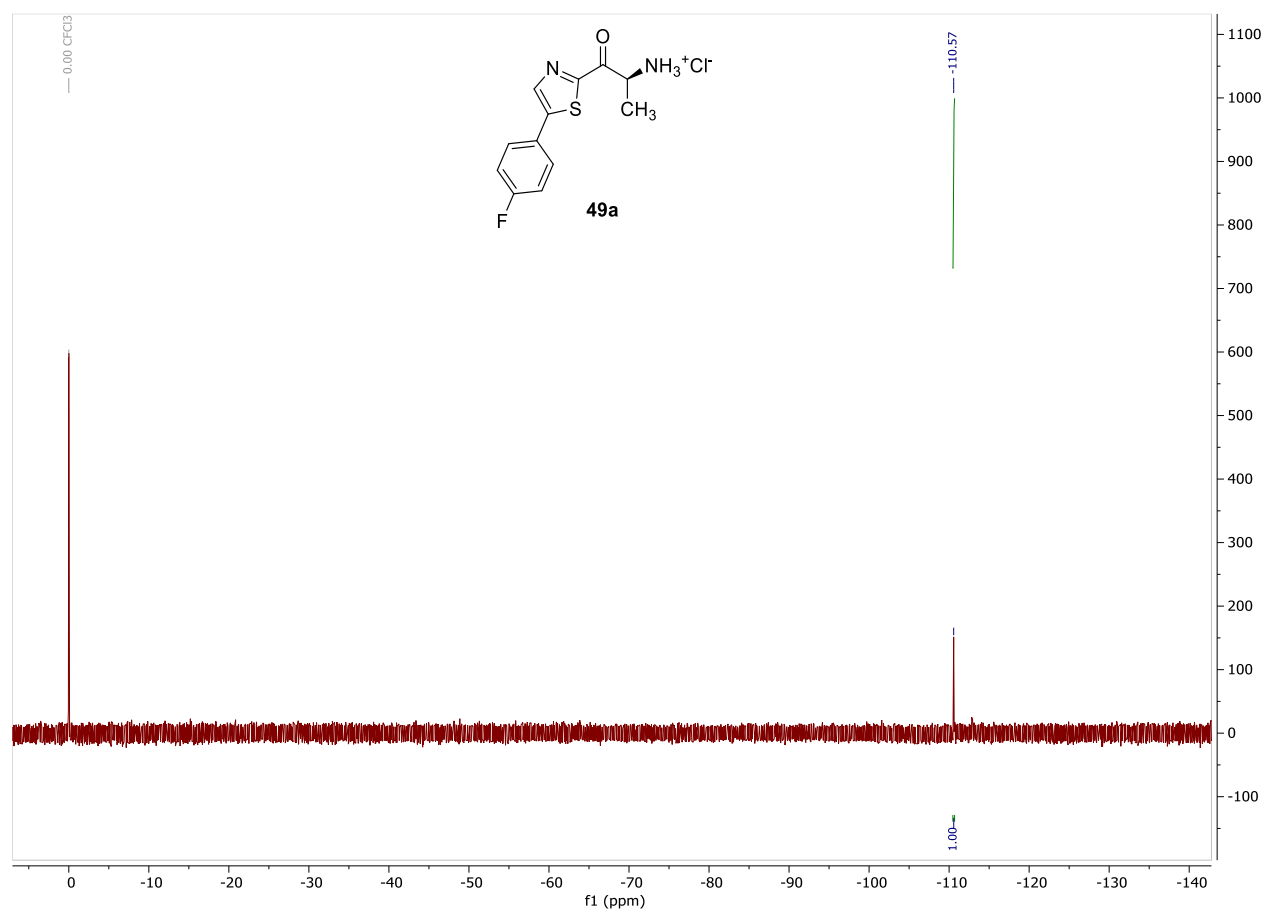



Compound **49b** ( $^1\text{H}$  NMR, 400 MHz):

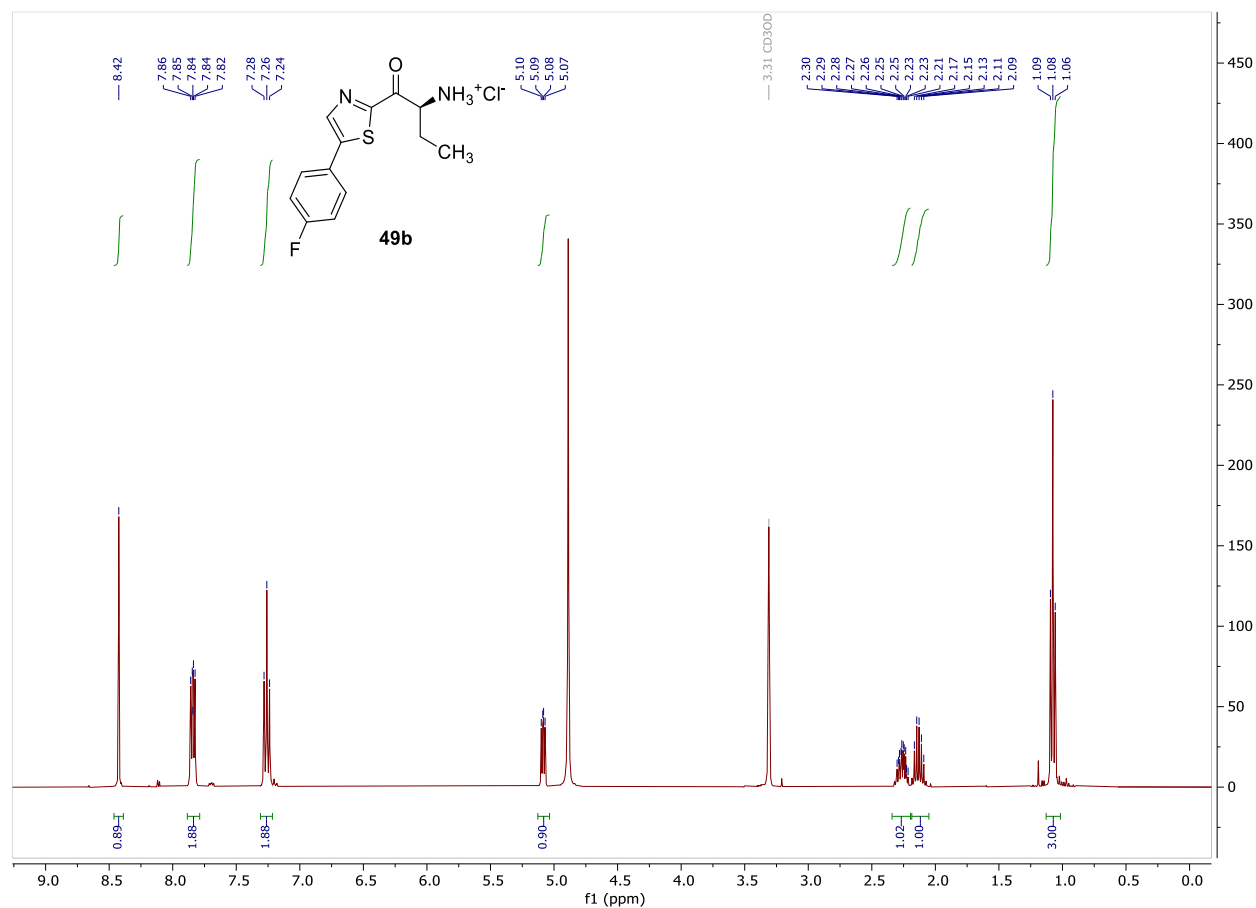

Compound **49b** ( $^{13}\text{C}$  NMR, 101 MHz):

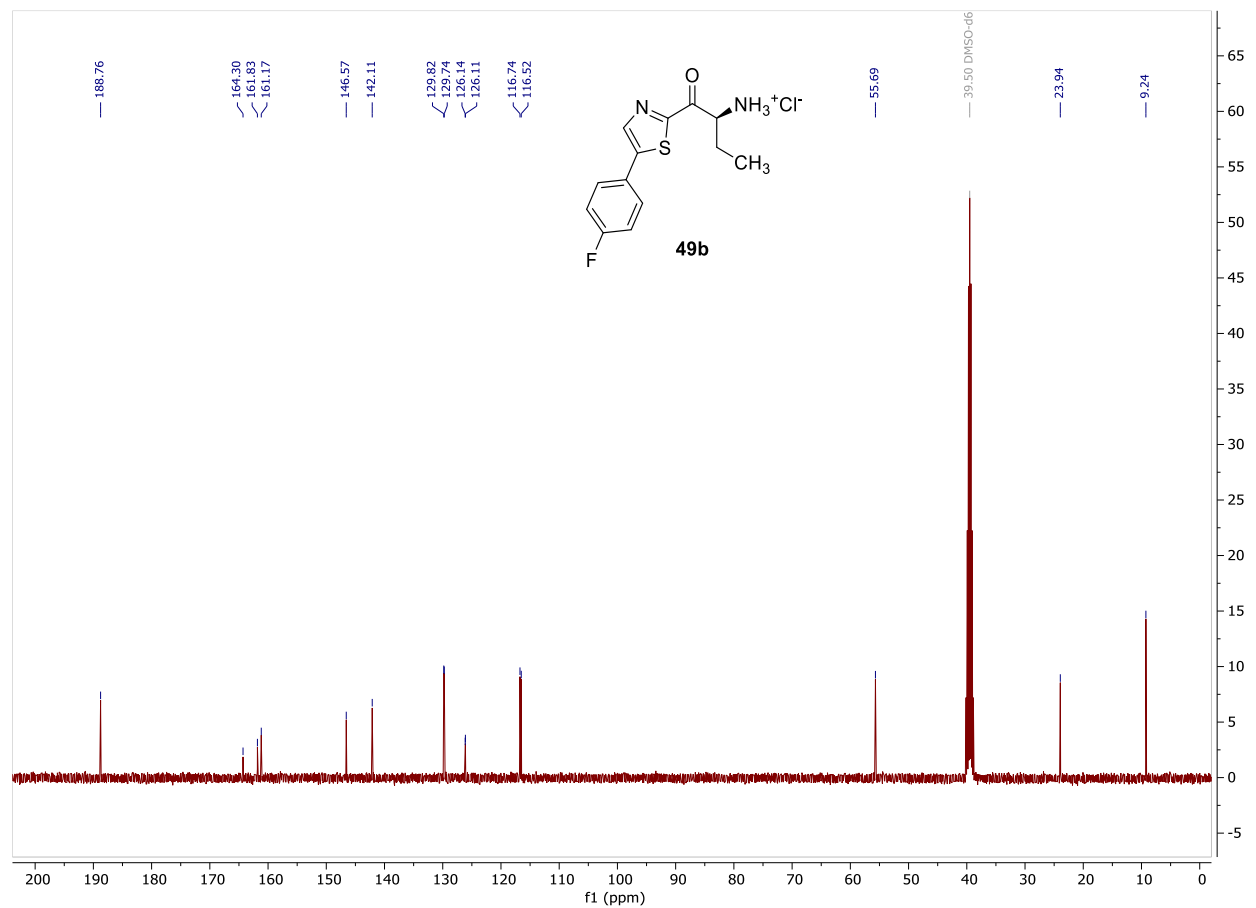

Compound **49b** ( $^{19}\text{F}$  NMR, 282 MHz):

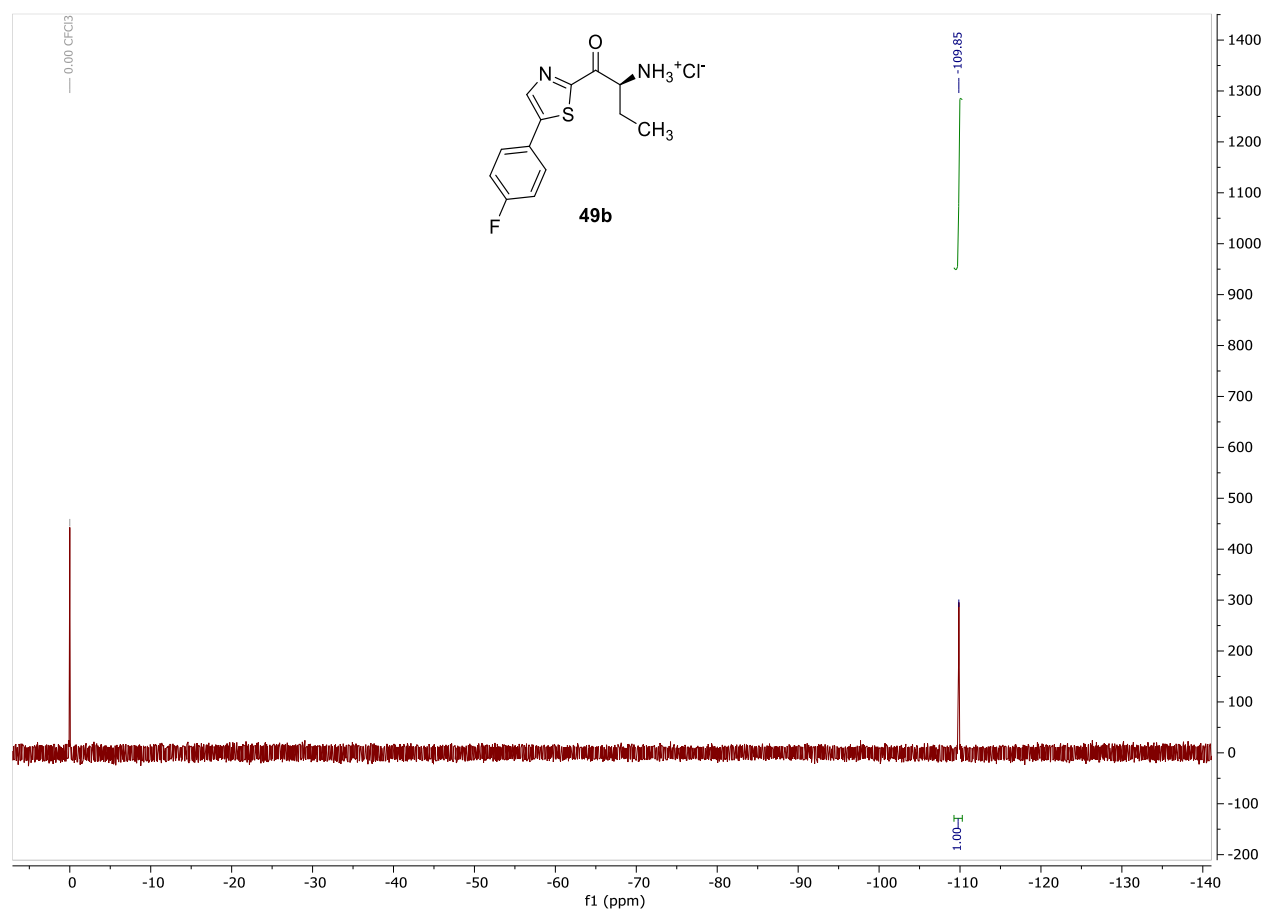

Compound **49c** ( $^1\text{H}$  NMR, 400 MHz):

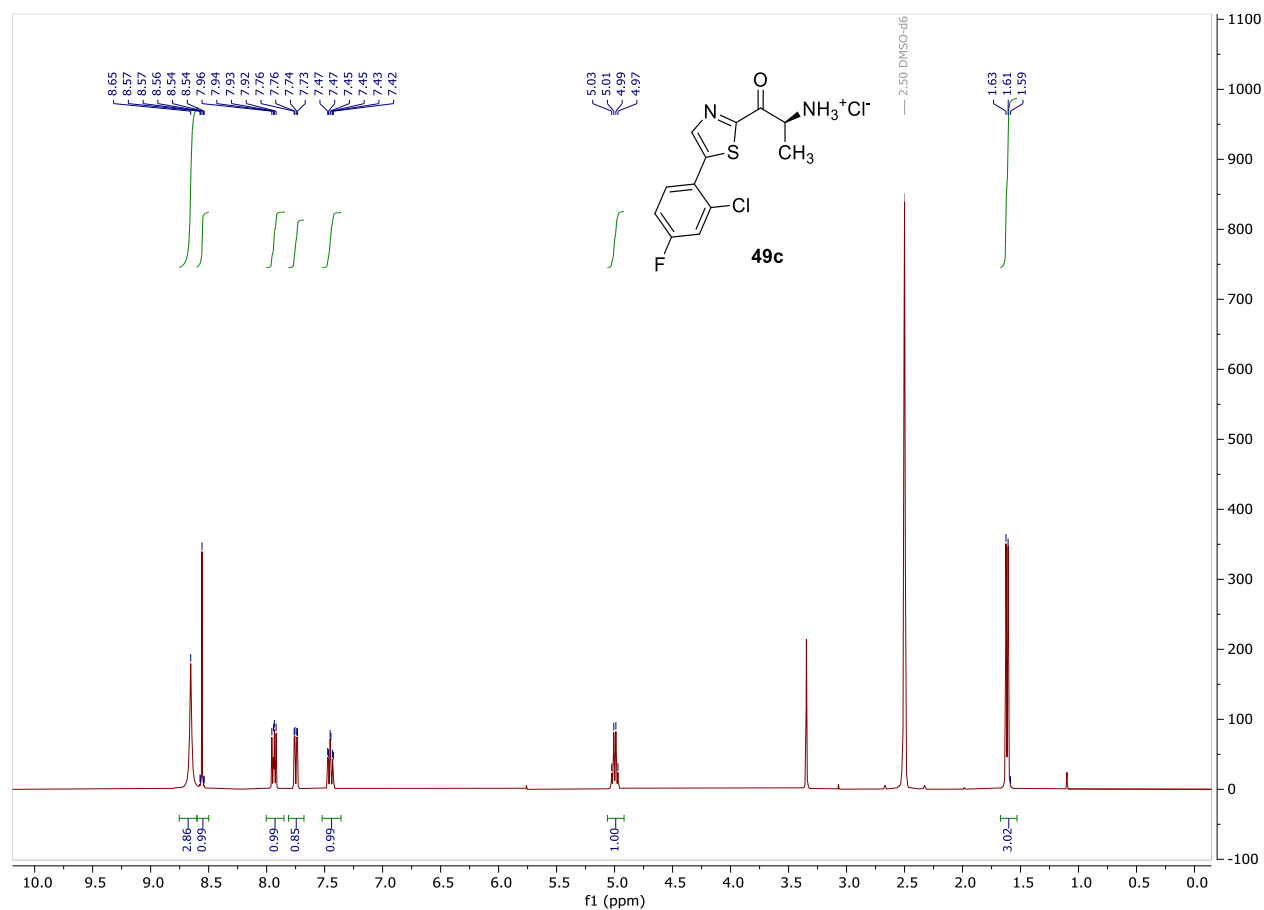

Compound **49c** ( $^{13}\text{C}$  NMR, 101 MHz):

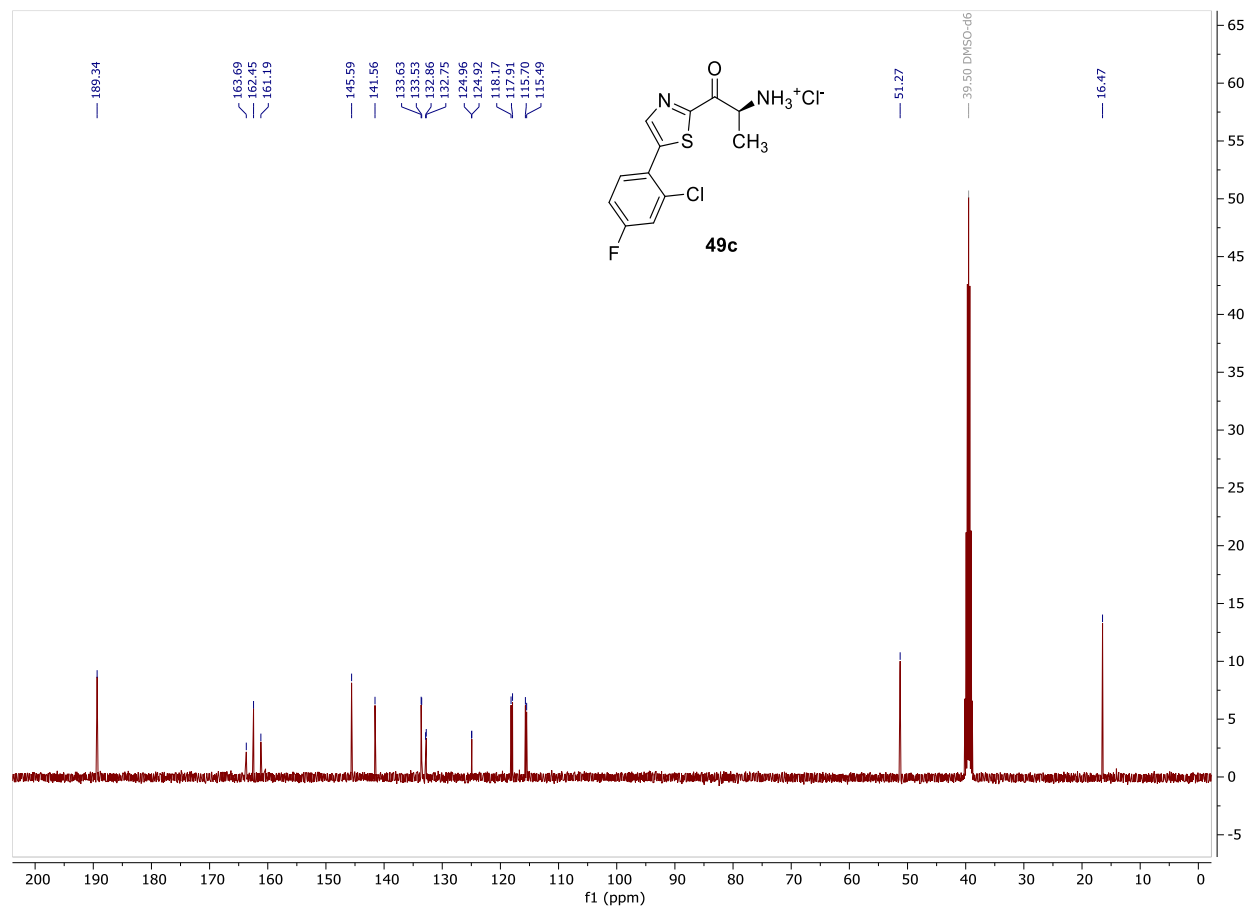

Compound **49c** ( $^{19}\text{F}$  NMR, 282 MHz):

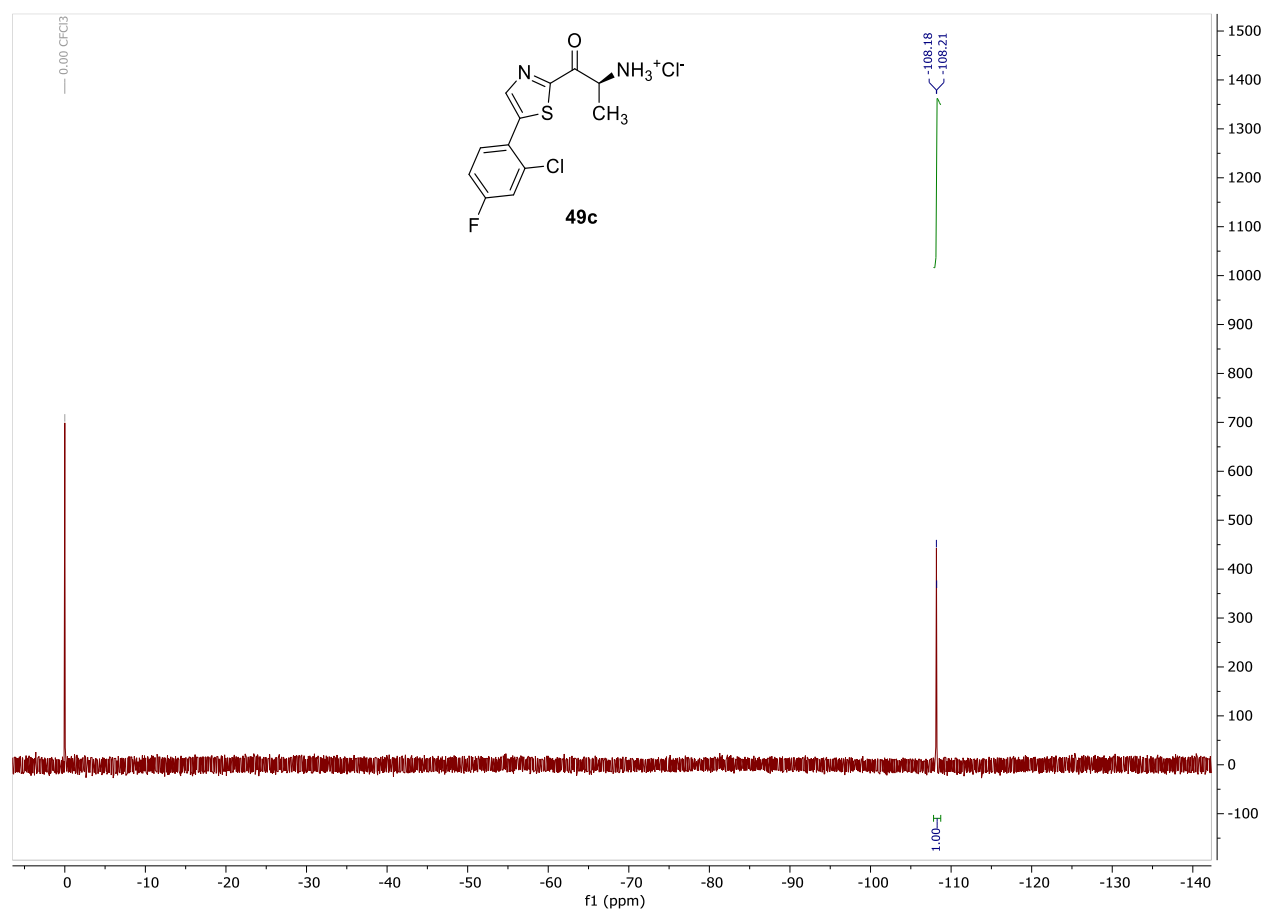

Compound **49d** ( $^1\text{H}$  NMR, 400 MHz):

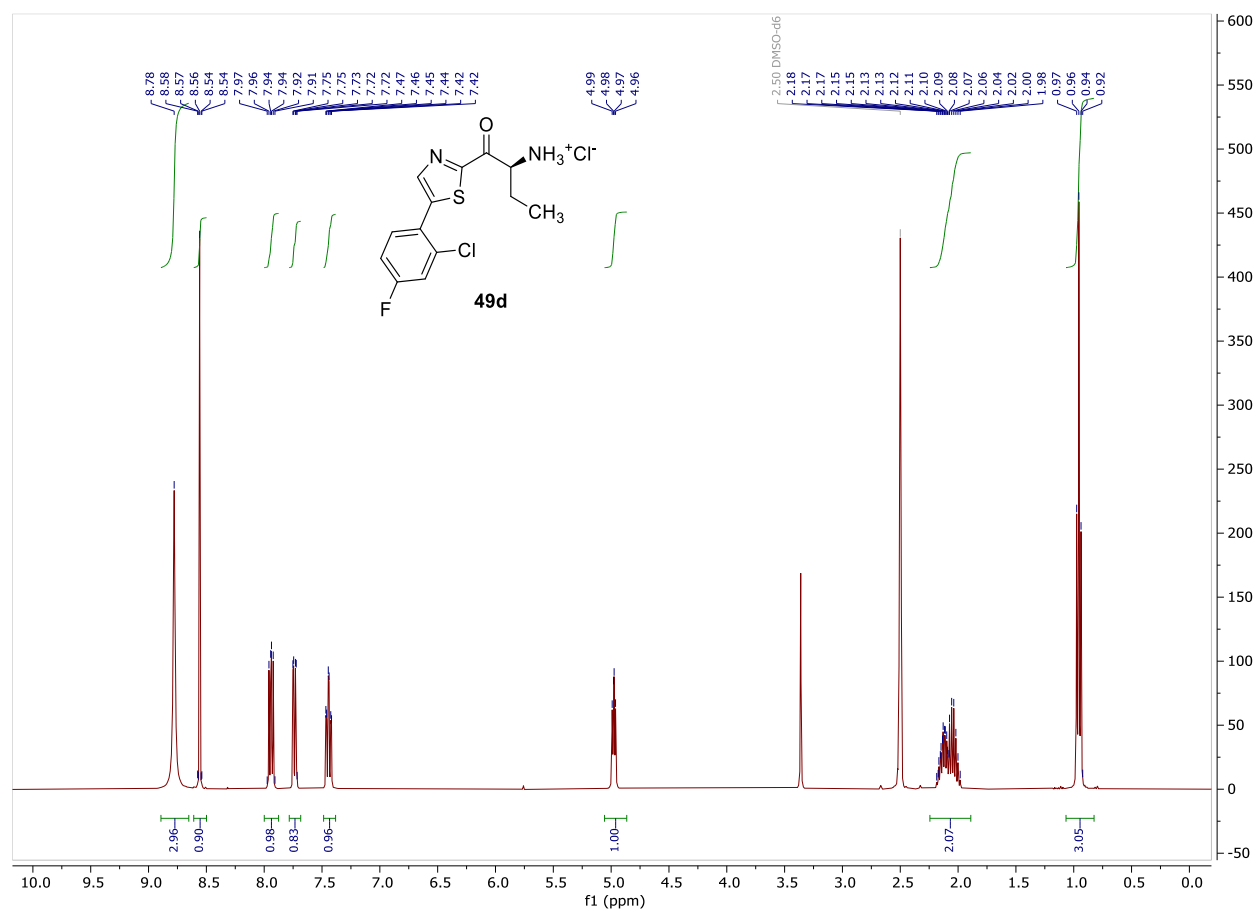

Compound **49d** ( $^{13}\text{C}$  NMR, 101 MHz):

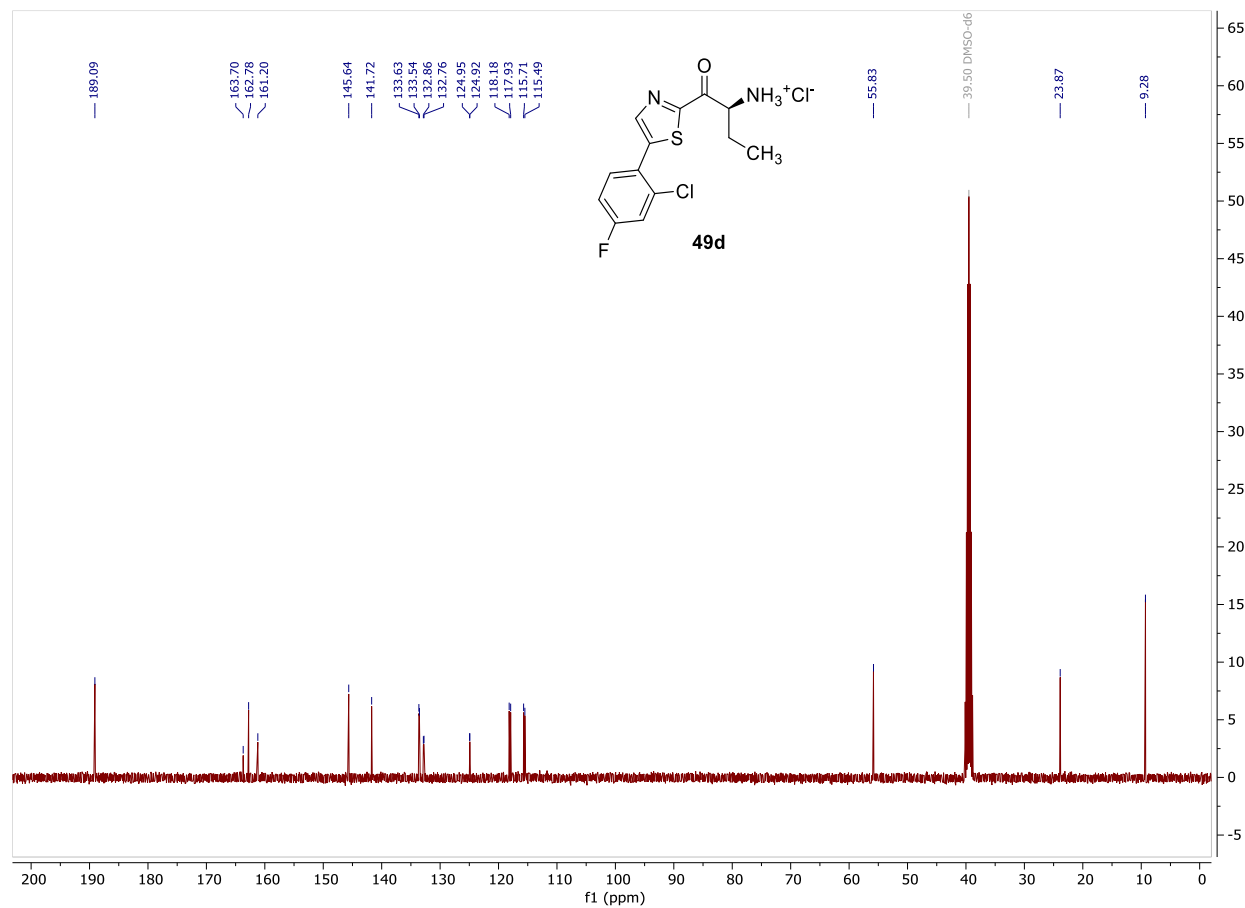

Compound **49d** ( $^{19}\text{F}$  NMR, 282 MHz):

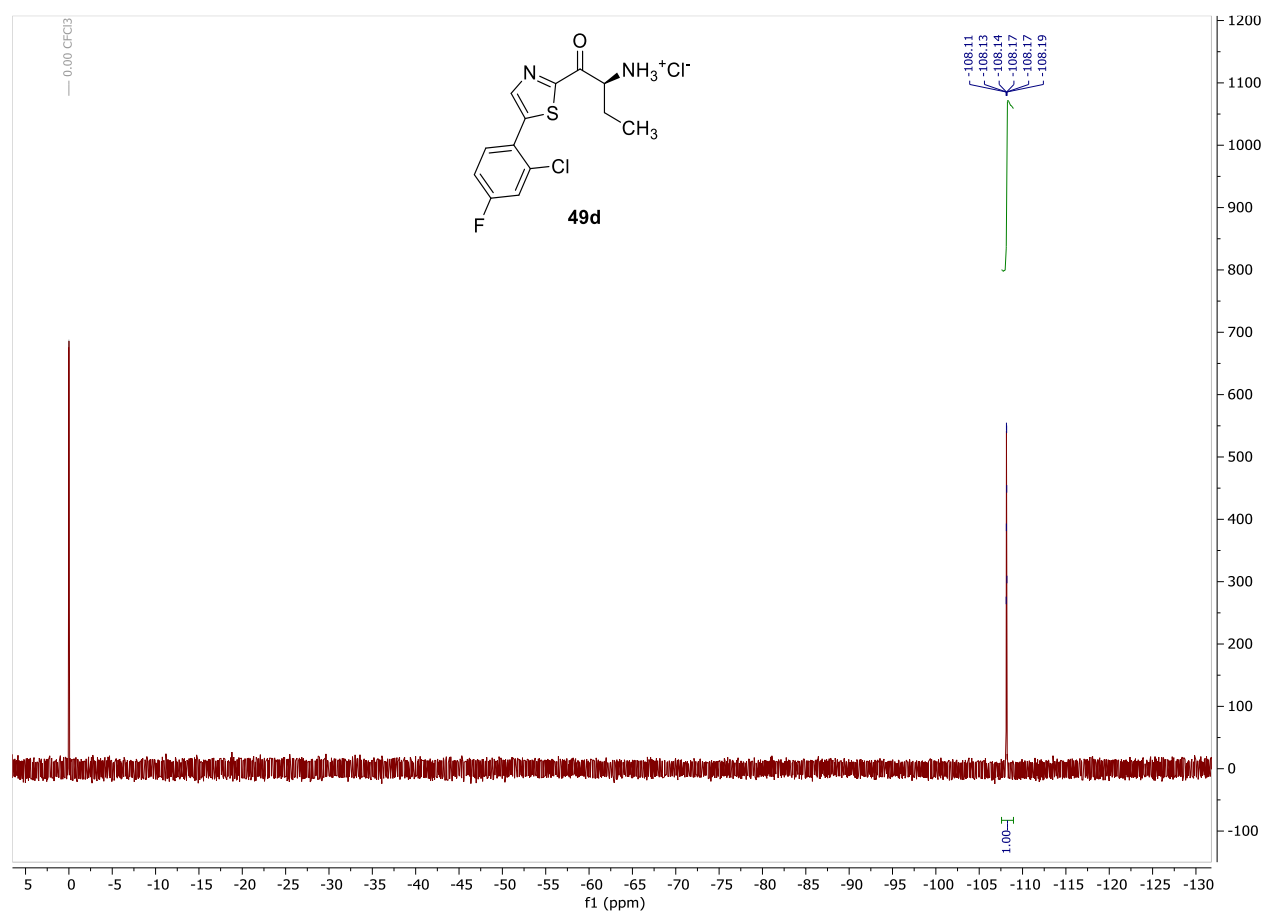

Supplement: s1 [file s1]
